# Supplementary material for: Size-dependent active site and its catalytic mechanism for CO2 hydrogenation reactivity and selectivity over Re/TiO2
Source: Research Square preprint supplement (doi:10.21203/rs.3.rs-2614327/v1), 2023-03-02
Supplement: Supplementary file 1 [file 6807691b1afa4da01217b26e.xlsx]

## Sheet: Figure 2a
	CO2 conversion(%)	Standard Deviation	CO selectivity(%)	CH4 selectivity(%)
0.5wt%Re/TiO2	3.4	0.00424	100	0
1.0wt%Re/TiO2	4.9	0.00424	100	0
1.5wt%Re/TiO2	5.3	0.0053	100	0
3.5wt%Re/TiO2	10.8	0.00707	91	9
5.0wt%Re/TiO2	16.3	0.01188	82	18
8.5wt%Re/TiO2	18.4	0.02263	72	28
12.0wt%Re/TiO2	25.9	0.01414	30	70
16.0wt%Re/TiO2	26.7	0.015	20	80
25.0wt%Re/TiO2	31.8	0.0129	9	91

## Sheet: Figure 2b
	TOF CO2	Standard Deviation		TOF CO	Standard Deviation		TOF CH4	Standard Deviation
0.5wt%Re/TiO2	0.08791	0.00853		0.08791	0.00853		0	0
1.0wt%Re/TiO2	0.06259	0.01069		0.06259	0.01069		0	0
1.5wt%Re/TiO2	0.04374	0.01245		0.04374	0.01245		0	0
3.5wt%Re/TiO2	0.03819	0.01257		0.03605	0.00675		0.00214	0.00601
5.0wt%Re/TiO2	0.04097	0.00994		0.03316	0.01135		0.00781	0.01724
8.5wt%Re/TiO2	0.07709	0.01462		0.05539	0.01153		0.02169	0.006
12.0wt%Re/TiO2	0.1564	0.01501		0.07029	0.00674		0.0861	0.01307
16.0wt%Re/TiO2	0.14947	0.01287		0.06541	0.00118		0.08405	0.01203
25.0wt%Re/TiO2	0.12878	0.01253		0.05689	0.00244		0.07189	0.01036

## Sheet: Figure 2c
	Ea(CO)(kJ/mol)	Standard Deviation	Ea(CH4)(kJ/mol)	Standard Deviation
0.5wt%Re/TiO2	87.7792	2.78069	--	0
1.0wt%Re/TiO2	86.5737	4.03348	--	0
1.5wt%Re/TiO2	86.5903	3.52909	--	0
3.5wt%Re/TiO2	86.9062	3.25512	133.556	2.65313
5.0wt%Re/TiO2	84.4536	2.09347	118.034	3.98882
8.5wt%Re/TiO2	84.4619	2.20517	109.504	2.38151
12.0wt%Re/TiO2	85.5344	3.15108	103.559	3.02763
16.0wt%Re/TiO2	85.6259	3.80952	109.487	4.71192
25.0wt%Re/TiO2	89.4503	3.23044	108.165	4.01528

## Sheet: Fgiure 2d
	PCO2-CH4	Standard Deviation	PH2-CH4	Standard Deviation	PCO2-CO	Standard Deviation	PH2-CO	Standard Deviation
0.5wt%Re/TiO2					0.453	0.03447	0.0188	0.03124
5.0wt%Re/TiO2	0.049	0.216	1.832	0.09	0.7157	0.121	0.244	0.02267
12.0wt%Re/TiO2	-0.1728	0.173	1.77	0.11	0.9346	0.12991	0.249	0.02454
