# Supplementary material for: Size-dependent active site and its catalytic mechanism for CO2 hydrogenation reactivity and selectivity over Re/TiO2
Source: Research Square preprint supplement (doi:10.21203/rs.3.rs-2614327/v1), 2023-03-02
Supplement: Supplementary file 2 [file c10e63ae988a2873d5432e81.xlsx]

## Sheet: Figure 1d
Wavenumber	0.5wt%Re/TiO2	1.0 wt%Re/TiO2	1.5wt%Re/TiO2	3.5wt%Re/TiO2	5.0wt%Re/TiO2	8.5wt%Re/TiO2	12.0wt%Re/TiO2	16.0wt%Re/TiO2	25.0wt%Re/TiO2
2201.38	-0.45446	-0.37128	-0.00107	0.02862	0.20591	0.06254	0.04633	0.22792	0.00222
2199.95	-0.45446	-0.37128	-0.00103	0.02865	0.20647	0.06254	0.04633	0.22801	0.00222
2198.52	-0.45454	-0.37088	-0.001	0.02868	0.20692	0.06254	0.04633	0.22808	0.00222
2197.1	-0.4547	-0.37088	-0.000986667	0.02869	0.20726	0.06254	0.04633	0.22815	0.00222
2195.67	-0.4547	-0.3716	-0.00096	0.0287	0.20751	0.06254	0.04649	0.22826	0.00222
2194.24	-0.45462	-0.37288	-0.00092	0.02871	0.20772	0.06254	0.04649	0.22836	0.00222
2192.81	-0.45462	-0.374	-0.000866667	0.02872	0.20799	0.06254	0.04649	0.22843	0.00222
2191.38	-0.45454	-0.37456	-0.00084	0.02875	0.20836	0.06254	0.04649	0.22846	0.00222
2189.96	-0.45446	-0.3748	-0.00084	0.02877	0.20879	0.06254	0.04665	0.2285	0.00222
2188.53	-0.45438	-0.3752	-0.000853333	0.0288	0.20915	0.06254	0.04665	0.22859	0.00222
2187.1	-0.45414	-0.37576	-0.000853333	0.02881	0.20935	0.06258	0.04681	0.2287	0.00222
2185.67	-0.45398	-0.3764	-0.000813333	0.02881	0.20936	0.06258	0.04681	0.22877	0.00222
2184.25	-0.4539	-0.37688	-0.000773333	0.02882	0.20923	0.06258	0.04681	0.22879	0.00222
2182.82	-0.45406	-0.37736	-0.000746667	0.02882	0.20905	0.06258	0.04681	0.22875	0.00222
2181.39	-0.4543	-0.37792	-0.000733333	0.02882	0.2089	0.06258	0.04665	0.22868	0.00222
2179.96	-0.45438	-0.37848	-0.000733333	0.02882	0.20884	0.06258	0.04665	0.22865	0.00222
2178.54	-0.45422	-0.37872	-0.000733333	0.02883	0.20889	0.06254	0.04681	0.22868	0.00222
2177.11	-0.4539	-0.37848	-0.00072	0.02884	0.20896	0.06254	0.04681	0.2287	0.00222
2175.68	-0.45358	-0.37776	-0.00072	0.02885	0.20892	0.06258	0.04697	0.22867	0.00222
2174.25	-0.45342	-0.37672	-0.000733333	0.02886	0.20876	0.06258	0.04697	0.22863	0.00222
2172.83	-0.45318	-0.37584	-0.000746667	0.02885	0.20857	0.06262	0.04697	0.2286	0.00222
2171.4	-0.45302	-0.37568	-0.000746667	0.02884	0.20849	0.06262	0.04697	0.22859	0.00222
2169.97	-0.45278	-0.37616	-0.000733333	0.02882	0.2086	0.06262	0.04697	0.22857	0.00222
2168.54	-0.45278	-0.3772	-0.000746667	0.02879	0.20883	0.06258	0.04697	0.22852	0.00222
2167.12	-0.45286	-0.37792	-0.000786667	0.02876	0.20903	0.06258	0.04697	0.22847	0.00222
2165.69	-0.45302	-0.37776	-0.000813333	0.02875	0.20909	0.06258	0.04697	0.22844	0.00222
2164.26	-0.45302	-0.37664	-0.000853333	0.02873	0.20897	0.06258	0.04697	0.22844	0.00222
2162.83	-0.45246	-0.37568	-0.00088	0.0287	0.20861	0.06258	0.04697	0.22841	0.00222
2161.41	-0.45166	-0.3752	-0.000906667	0.02867	0.20809	0.06258	0.04697	0.22832	0.00222
2159.98	-0.4507	-0.37456	-0.000946667	0.02862	0.20762	0.06258	0.04697	0.2282	0.00222
2158.55	-0.45006	-0.37336	-0.000973333	0.02859	0.20727	0.06258	0.04697	0.22806	0.00222
2157.12	-0.44958	-0.37208	-0.00101	0.02855	0.20696	0.06258	0.04713	0.22795	0.00222
2155.69	-0.44926	-0.3712	-0.00105	0.02851	0.20654	0.06258	0.04713	0.22786	0.00223
2154.27	-0.4491	-0.37112	-0.00108	0.0285	0.20595	0.06258	0.04713	0.22776	0.00223
2152.84	-0.44942	-0.37136	-0.00108	0.02852	0.20531	0.06258	0.04713	0.22766	0.00223
2151.41	-0.45038	-0.37144	-0.00101	0.0286	0.20479	0.06258	0.04697	0.22754	0.00223
2149.98	-0.45198	-0.3712	-0.000893333	0.02869	0.20439	0.06254	0.04697	0.22743	0.00223
2148.56	-0.45382	-0.37104	-0.00076	0.02878	0.20399	0.06254	0.04713	0.22733	0.00223
2147.13	-0.4555	-0.37104	-0.000626667	0.02888	0.20349	0.06258	0.04713	0.22722	0.00223
2145.7	-0.45654	-0.37088	-0.000493333	0.02899	0.20289	0.06258	0.04713	0.22712	0.00223
2144.27	-0.45694	-0.3704	-0.000333333	0.02914	0.20244	0.06258	0.04713	0.22707	0.00223
2142.85	-0.45662	-0.3692	-0.000133333	0.02933	0.20258	0.06262	0.04713	0.22721	0.00223
2141.42	-0.45558	-0.36784	0.00016	0.02961	0.20354	0.06266	0.04713	0.22754	0.00224
2139.99	-0.45374	-0.3668	0.000586667	0.02996	0.20511	0.0627	0.04713	0.22794	0.00224
2138.56	-0.45094	-0.36616	0.00116	0.03045	0.20699	0.06282	0.04729	0.22835	0.00227
2137.14	-0.44734	-0.36512	0.00192	0.03113	0.20906	0.06294	0.04745	0.22881	0.00229
2135.71	-0.44262	-0.36312	0.00295	0.0321	0.2114	0.0631	0.04777	0.22935	0.00235
2134.28	-0.4363	-0.35968	0.0044	0.03351	0.21426	0.06342	0.04825	0.22999	0.00248
2132.85	-0.42734	-0.35416	0.00651	0.03555	0.21791	0.06386	0.04889	0.23075	0.00273
2131.43	-0.41446	-0.34568	0.00957	0.03845	0.22249	0.06462	0.05001	0.23165	0.0032
2130	-0.39662	-0.33272	0.01397	0.04248	0.22789	0.06582	0.05161	0.23279	0.00402
2128.57	-0.3739	-0.31464	0.02008	0.04772	0.23383	0.0677	0.05369	0.23426	0.00531
2127.14	-0.34734	-0.2924	0.02799	0.05399	0.23995	0.07062	0.05641	0.23609	0.00709
2125.71	-0.31886	-0.26736	0.03736	0.06087	0.2461	0.07482	0.05977	0.23818	0.00921
2124.29	-0.29126	-0.24112	0.04752	0.0677	0.25224	0.08022	0.06313	0.24036	0.01129
2122.86	-0.26766	-0.21784	0.05756	0.07388	0.25805	0.08626	0.06633	0.24251	0.01289
2121.43	-0.25134	-0.2024	0.06663	0.07886	0.26298	0.09186	0.06841	0.2445	0.01366
2120	-0.24446	-0.19664	0.07393	0.08204	0.26653	0.09582	0.06921	0.24623	0.01346
2118.58	-0.24782	-0.20072	0.07847	0.08253	0.26828	0.09734	0.06873	0.24753	0.0124
2117.15	-0.26102	-0.2148	0.079	0.07984	0.26789	0.09634	0.06729	0.24824	0.01081
2115.72	-0.28214	-0.23704	0.07483	0.07428	0.26545	0.09334	0.06505	0.24827	0.00899
2114.29	-0.30838	-0.26288	0.06652	0.06706	0.26134	0.08906	0.06265	0.2476	0.00724
2112.87	-0.33654	-0.28824	0.05585	0.05961	0.25593	0.08434	0.05993	0.24628	0.00577
2111.44	-0.36398	-0.3112	0.04493	0.05303	0.24956	0.07978	0.05737	0.24445	0.00463
2110.01	-0.3887	-0.33016	0.03533	0.04778	0.24277	0.07574	0.05529	0.24233	0.00381
2108.58	-0.40934	-0.34504	0.02765	0.04382	0.23617	0.07238	0.05337	0.24011	0.00323
2107.16	-0.42558	-0.3568	0.02184	0.04093	0.23022	0.06974	0.05177	0.23796	0.00287
2105.73	-0.43782	-0.36584	0.01759	0.03883	0.22499	0.06778	0.05065	0.23601	0.00263
2104.3	-0.4467	-0.372	0.01451	0.03728	0.22035	0.0663	0.04969	0.23431	0.00248
2102.87	-0.45286	-0.37568	0.01224	0.03613	0.21641	0.06522	0.04889	0.23295	0.00239
2101.45	-0.45702	-0.37784	0.01056	0.03529	0.21354	0.06446	0.04841	0.23195	0.00234
2100.02	-0.45982	-0.3792	0.00931	0.03466	0.21182	0.06394	0.04793	0.2313	0.0023
2098.59	-0.46158	-0.38008	0.00836	0.03418	0.21087	0.06358	0.04761	0.23091	0.00228
2097.16	-0.4627	-0.3808	0.00765	0.03381	0.21017	0.06334	0.04745	0.2307	0.00227
2095.73	-0.46342	-0.38128	0.00712	0.03355	0.20943	0.06318	0.04713	0.23059	0.00226
2094.31	-0.4639	-0.38152	0.00672	0.03335	0.20877	0.06302	0.04697	0.23049	0.00226
2092.88	-0.46422	-0.38168	0.00641	0.03321	0.20838	0.0629	0.04681	0.2304	0.00224
2091.45	-0.46454	-0.38144	0.00619	0.03313	0.20818	0.06278	0.04681	0.23032	0.00224
2090.02	-0.46494	-0.38096	0.00604	0.03308	0.20793	0.06274	0.04681	0.23026	0.00224
2088.6	-0.46526	-0.38056	0.00672	0.03304	0.20758	0.0627	0.04681	0.23023	0.00224
2087.17	-0.46566	-0.38064	0.00641	0.03294	0.20728	0.0627	0.04665	0.23024	0.00198
2085.74	-0.46606	-0.38096	0.00619	0.03278	0.20718	0.0627	0.04665	0.23027	0.00208
2084.31	-0.46646	-0.38136	0.00604	0.03264	0.20739	0.06266	0.04665	0.23033	0.00198
2082.89	-0.46678	-0.38176	0.00641	0.03256	0.20786	0.0627	0.04665	0.23047	0.00198
2081.46	-0.46694	-0.38216	0.00619	0.03257	0.20839	0.06266	0.04665	0.23068	0.00198
2080.03	-0.46694	-0.38248	0.00604	0.03256	0.20892	0.0627	0.04665	0.23094	0.00198
2078.6	-0.4667	-0.38224	0.00488	0.03259	0.20949	0.06346	0.042	0.23196	0.0015
2077.18	-0.46638	-0.38128	0.00376	0.03277	0.21007	0.06429	0.04338	0.23313	0.00084
2075.75	-0.46606	-0.38	0.00274	0.03315	0.21067	0.06502	0.04425	0.23456	0.0003
2074.32	-0.46582	-0.37896	0.00186	0.03363	0.21136	0.06562	0.04452	0.23624	0
2072.89	-0.46574	-0.37856	0.00118	0.03277	0.21219	0.06627	0.04482	0.23798	6e-05
2071.47	-0.4659	-0.3788	0.00066	0.03315	0.21313	0.06714	0.04572	0.23966	0.00048
2070.04	-0.46622	-0.37912	0.0003	0.03363	0.2142	0.06827	0.04719	0.2414	0.00144
2068.61	-0.46678	-0.37936	0.0001	0.03277	0.21543	0.06966	0.04905	0.24332	0.00294
2067.18	-0.46742	-0.37952	0	0.03315	0.21687	0.07131	0.05121	0.24549	0.00516
2065.76	-0.46814	-0.3796	0	0.03363	0.21856	0.07323	0.05364	0.24801	0.0084
2064.33	-0.4687	-0.37952	0	0.03419	0.22042	0.07552	0.05646	0.25079	0.01302
2062.9	-0.46926	-0.37944	0	0.03483	0.2225	0.07824	0.05997	0.2538	0.0192
2061.47	-0.46974	-0.3796	4e-05	0.03555	0.22515	0.08146	0.06423	0.25737	0.0273
2060.04	-0.4703	-0.38	0.00044	0.03637	0.22868	0.08529	0.06933	0.26192	0.03786
2058.62	-0.47078	-0.38056	0.00116	0.03733	0.23321	0.08987	0.07527	0.26762	0.051
2057.19	-0.47126	-0.38112	0.00218	0.03843	0.23882	0.09524	0.08214	0.27469	0.06696
2055.76	-0.47166	-0.38144	0.0035	0.03973	0.24556	0.10148	0.09003	0.28315	0.08616
2054.33	-0.47198	-0.38128	0.0051	0.04136	0.25323	0.10872	0.09906	0.29288	0.10818
2052.91	-0.47214	-0.3808	0.00698	0.04339	0.26174	0.11705	0.10914	0.30392	0.13254
2051.48	-0.47238	-0.38048	0.00916	0.04589	0.27123	0.12648	0.1203	0.31656	0.15936
2050.05	-0.4727	-0.3804	0.01162	0.04901	0.2818	0.13698	0.13251	0.33085	0.1878
2048.62	-0.47302	-0.38056	0.01436	0.05285	0.29348	0.14828	0.14559	0.34675	0.21708
2047.2	-0.47334	-0.38112	0.01734	0.05749	0.30621	0.15998	0.15912	0.36447	0.24822
2045.77	-0.47358	-0.38192	0.02046	0.06309	0.31969	0.17171	0.17277	0.38426	0.28134
2044.34	-0.47374	-0.3824	0.02354	0.06971	0.33354	0.18318	0.18603	0.4061	0.31536
2042.91	-0.47374	-0.38208	0.02646	0.07736	0.34749	0.19415	0.19812	0.42962	0.34992
2041.49	-0.47358	-0.38128	0.0291	0.08605	0.36092	0.20459	0.20895	0.45407	0.38388
2040.06	-0.47326	-0.38088	0.0313	0.09581	0.37277	0.21457	0.21894	0.47835	0.4146
2038.63	-0.47278	-0.38088	0.03294	0.10632	0.38222	0.22403	0.22839	0.50133	0.4401
2037.2	-0.4723	-0.38088	0.03396	0.11741	0.38872	0.23279	0.23712	0.52129	0.45834
2035.78	-0.47214	-0.3808	0.03434	0.12877	0.3915	0.24045	0.24489	0.53558	0.46518
2034.35	-0.47222	-0.3804	0.03408	0.13987	0.39002	0.24645	0.25149	0.54177	0.45828
2032.92	-0.4727	-0.38008	0.03326	0.14992	0.38425	0.2504	0.25683	0.53877	0.43872
2031.49	-0.47334	-0.37976	0.03196	0.15803	0.37472	0.25215	0.26076	0.52695	0.40824
2030.06	-0.47398	-0.37968	0.03018	0.16328	0.36245	0.25164	0.26283	0.50827	0.3702
2028.64	-0.47446	-0.37976	0.02798	0.16504	0.34874	0.24892	0.26295	0.4857	0.3294
2027.21	-0.47494	-0.37976	0.02542	0.16323	0.33464	0.24429	0.26133	0.46199	0.2892
2025.78	-0.47534	-0.38	0.02258	0.15816	0.32092	0.23805	0.25797	0.43892	0.25164
2024.35	-0.47566	-0.38024	0.01956	0.15064	0.30813	0.2306	0.25293	0.41732	0.21834
2022.93	-0.47598	-0.38064	0.01648	0.14171	0.29652	0.22235	0.24666	0.39749	0.18906
2021.5	-0.47622	-0.38112	0.01346	0.13232	0.28612	0.21363	0.23961	0.37968	0.1629
2020.07	-0.47622	-0.38168	0.01058	0.12317	0.27689	0.20468	0.23202	0.36413	0.13986
2018.64	-0.47614	-0.38216	0.00796	0.11461	0.26872	0.19568	0.22401	0.35051	0.12024
2017.22	-0.47598	-0.38208	0.00566	0.10667	0.26146	0.18682	0.21597	0.33835	0.10392
2015.79	-0.47582	-0.38136	0.00378	0.09936	0.25512	0.17845	0.20844	0.32756	0.09048
2014.36	-0.4755	-0.3804	0.0023	0.09288	0.24973	0.17092	0.20193	0.31833	0.07902
2012.93	-0.4751	-0.38	0.00122	0.08728	0.24524	0.16429	0.19614	0.31061	0.069
2011.51	-0.47462	-0.38016	0.0005	0.08251	0.24161	0.15841	0.19062	0.30431	0.06042
2010.08	-0.4743	-0.3804	8e-05	0.07845	0.23874	0.15325	0.18522	0.29933	0.05358
2008.65	-0.47414	-0.3804	0	0.07507	0.23639	0.14881	0.1803	0.29534	0.04794
2007.22	-0.47414	-0.38008	0	0.07221	0.23443	0.14497	0.17589	0.29205	0.0429
2005.8	-0.4739	-0.37976	0	0.06979	0.23296	0.14162	0.17184	0.28932	0.03858
2004.37	-0.4735	-0.37936	0	0.06765	0.23201	0.13873	0.16809	0.28715	0.0348
2002.94	-0.47286	-0.3788	0	0.06573	0.2315	0.13623	0.16464	0.28561	0.03126
2001.51	-0.47222	-0.37816	0	0.06397	0.23141	0.13403	0.16164	0.28492	0.02796
2000.08	-0.4719	-0.3776	0	0.0624	0.23168	0.13215	0.15909	0.28473	0.02502
1998.66	-0.4719	-0.37704	0	0.06096	0.23222	0.1307	0.15687	0.28496	0.0225
1997.23	-0.47222	-0.37672	0	0.05963	0.23294	0.12975	0.15492	0.28565	0.02052
1995.8	-0.47278	-0.37712	0	0.0584	0.2338	0.1292	0.15321	0.28701	0.01896
1994.37	-0.4735	-0.37848	0	0.05736	0.23473	0.12886	0.1515	0.28903	0.01746
1992.95	-0.4743	-0.38008	0	0.05659	0.2356	0.12863	0.14982	0.29117	0.01614
1991.52	-0.47494	-0.38064	0	0.05605	0.23626	0.12862	0.14862	0.29277	0.01506
1990.09	-0.47534	-0.38	0	0.05568	0.23677	0.12902	0.1485	0.29373	0.01428
1988.66	-0.47534	-0.37896	2e-05	0.05541	0.23735	0.12986	0.14925	0.29456	0.01362
1987.24	-0.47502	-0.37816	0	0.05517	0.23819	0.13101	0.15039	0.29566	0.01308
1985.81	-0.47446	-0.37776	0	0.05488	0.23939	0.13235	0.15186	0.29712	0.0126
1984.38	-0.47398	-0.37768	0	0.05459	0.24088	0.1338	0.15363	0.29888	0.01224
1982.95	-0.47374	-0.37784	0	0.05432	0.24245	0.13541	0.1557	0.30069	0.012
1981.53	-0.47366	-0.37816	0	0.05411	0.24383	0.13726	0.15789	0.30221	0.01182
1980.1	-0.47358	-0.37848	0	0.05403	0.24506	0.13938	0.16023	0.30335	0.01176
1978.67	-0.47342	-0.3788	0	0.05405	0.24641	0.14169	0.16269	0.30436	0.01176
1977.24	-0.47326	-0.37896	0	0.05424	0.24812	0.14402	0.165	0.30547	0.01188
1975.82	-0.47318	-0.37864	0	0.05469	0.25028	0.14618	0.16704	0.30681	0.01206
1974.39	-0.47334	-0.37816	0.00022	0.05533	0.25288	0.1481	0.16872	0.30842	0.01236
1972.96	-0.47374	-0.37792	0.00064	0.05611	0.2558	0.1498	0.16998	0.31044	0.0129
1971.53	-0.4743	-0.37848	0.00122	0.05693	0.25899	0.1514	0.17073	0.31315	0.01362
1970.1	-0.47486	-0.37984	0.00192	0.05773	0.26252	0.15298	0.17097	0.31675	0.01452
1968.68	-0.47534	-0.38112	0.00268	0.05859	0.26642	0.15462	0.17094	0.3209	0.01584
1967.25	-0.47566	-0.3816	0.0035	0.05941	0.27049	0.15645	0.17118	0.32484	0.01776
1965.82	-0.47574	-0.38096	0.00436	0.06016	0.27449	0.15868	0.17244	0.32812	0.02028
1964.39	-0.4755	-0.37992	0.00522	0.06077	0.27846	0.16139	0.17487	0.33112	0.0231
1962.97	-0.4751	-0.37904	0.00608	0.06139	0.2826	0.16437	0.17778	0.33454	0.02604
1961.54	-0.47462	-0.3784	0.00694	0.06213	0.28701	0.16733	0.18069	0.33891	0.02922
1960.11	-0.47406	-0.37792	0.0079	0.06307	0.29161	0.17018	0.1836	0.34417	0.03288
1958.68	-0.4735	-0.37776	0.00902	0.06416	0.29643	0.17286	0.18636	0.34987	0.0372
1957.26	-0.47302	-0.37792	0.01032	0.06541	0.30161	0.17533	0.1884	0.35547	0.04236
1955.83	-0.47262	-0.378	0.01174	0.06691	0.30708	0.17753	0.18927	0.36071	0.0483
1954.4	-0.47222	-0.37768	0.01318	0.06856	0.3125	0.17952	0.18906	0.36574	0.0549
1952.97	-0.47198	-0.37696	0.01462	0.07035	0.31771	0.1814	0.18813	0.37092	0.06216
1951.55	-0.47198	-0.3764	0.01614	0.07243	0.32278	0.18321	0.18675	0.37662	0.06996
1950.12	-0.47238	-0.37656	0.0178	0.07485	0.32782	0.18491	0.18504	0.383	0.078
1948.69	-0.47334	-0.37736	0.01958	0.07771	0.33276	0.18666	0.18318	0.38983	0.0858
1947.26	-0.47446	-0.3784	0.02136	0.08088	0.33736	0.18871	0.18138	0.39674	0.09288
1945.84	-0.47542	-0.37968	0.02304	0.08435	0.34133	0.19114	0.17967	0.40347	0.09894
1944.41	-0.47598	-0.38104	0.02452	0.08795	0.34435	0.1938	0.17793	0.40958	0.10416
1942.98	-0.47598	-0.3816	0.02578	0.09173	0.34612	0.19669	0.1764	0.41383	0.10902
1941.55	-0.47542	-0.3804	0.02674	0.09573	0.34662	0.20002	0.17622	0.41515	0.11376
1940.13	-0.47446	-0.378	0.02746	0.09963	0.34628	0.20374	0.17808	0.4143	0.11748
1938.7	-0.47334	-0.376	0.02794	0.10309	0.34565	0.20734	0.18105	0.41305	0.11928
1937.27	-0.47214	-0.3752	0.02816	0.10603	0.34492	0.21028	0.18357	0.41214	0.11898
1935.84	-0.47102	-0.37536	0.02812	0.10845	0.34387	0.21238	0.18492	0.41115	0.1167
1934.41	-0.47022	-0.37584	0.02776	0.11029	0.34228	0.21375	0.1854	0.4096	0.11304
1932.99	-0.4699	-0.37632	0.02714	0.11141	0.34022	0.21444	0.18546	0.40733	0.1083
1931.56	-0.46998	-0.37656	0.02622	0.11192	0.33793	0.21443	0.18516	0.4044	0.10332
1930.13	-0.47046	-0.3764	0.025	0.11184	0.33556	0.21378	0.18438	0.40099	0.09834
1928.7	-0.4711	-0.37592	0.0235	0.1112	0.33299	0.21266	0.18294	0.39748	0.0933
1927.28	-0.47182	-0.37592	0.02192	0.11008	0.33023	0.21116	0.1809	0.39448	0.0879
1925.85	-0.47286	-0.37704	0.02042	0.10859	0.32749	0.20925	0.17814	0.39243	0.08208
1924.42	-0.47414	-0.37888	0.01902	0.10675	0.32489	0.20687	0.17448	0.39079	0.07608
1922.99	-0.47542	-0.37992	0.01762	0.10445	0.32239	0.20411	0.17013	0.3885	0.07044
1921.57	-0.4763	-0.38008	0.01614	0.10179	0.31999	0.20127	0.16617	0.38538	0.06546
1920.14	-0.47654	-0.38048	0.01458	0.09901	0.31773	0.1986	0.16305	0.38212	0.06084
1918.71	-0.47622	-0.38104	0.013	0.09632	0.31539	0.19598	0.16011	0.37862	0.05646
1917.28	-0.47542	-0.37992	0.0115	0.09363	0.31276	0.19328	0.15729	0.3742	0.0528
1915.86	-0.4743	-0.37704	0.01008	0.09083	0.30996	0.19074	0.15549	0.36923	0.04986
1914.43	-0.47318	-0.3744	0.00866	0.08816	0.30726	0.18854	0.15468	0.36504	0.04722
1913	-0.47198	-0.3736	0.00728	0.08571	0.3048	0.18641	0.15354	0.36222	0.04428
1911.57	-0.47078	-0.3744	0.00596	0.08341	0.30265	0.18407	0.1512	0.36023	0.04098
1910.15	-0.46974	-0.37536	0.00468	0.08112	0.30084	0.18151	0.14802	0.35808	0.03774
1908.72	-0.46902	-0.37536	0.00344	0.07875	0.29926	0.17898	0.14478	0.35516	0.03498
1907.29	-0.46846	-0.37464	0.00234	0.0764	0.29767	0.17677	0.1422	0.35168	0.03282
1905.86	-0.46774	-0.37384	0.0015	0.07419	0.2961	0.17496	0.14034	0.34841	0.03096
1904.43	-0.46678	-0.3732	0.00096	0.07224	0.29477	0.17337	0.13875	0.34582	0.0291
1903.01	-0.46598	-0.37248	0.00062	0.07061	0.29389	0.17175	0.13686	0.34389	0.02736
1901.58	-0.46534	-0.37144	0.0004	0.06917	0.29348	0.16999	0.1344	0.34242	0.02586
1900.15	-0.46494	-0.37056	0.0003	0.06795	0.29352	0.1681	0.13161	0.34151	0.02466
1898.72	-0.4647	-0.37048	0.00026	0.06707	0.29394	0.16618	0.12879	0.34137	0.0237
1897.3	-0.46486	-0.37096	0.0002	0.06664	0.29461	0.16423	0.12603	0.34185	0.02298
1895.87	-0.46534	-0.37128	0.0001	0.06664	0.29542	0.16225	0.12315	0.34245	0.02268
1894.44	-0.4659	-0.37096	2e-05	0.06691	0.29631	0.16044	0.1203	0.34304	0.02286
1893.01	-0.46638	-0.37096	6e-05	0.06728	0.29734	0.15899	0.11772	0.34426	0.02322
1891.59	-0.46654	-0.37208	0.00018	0.06773	0.29853	0.15777	0.11508	0.34652	0.02346
1890.16	-0.46622	-0.37312	0.00028	0.06837	0.29978	0.1565	0.11205	0.34887	0.02394
1888.73	-0.4655	-0.37264	0.00026	0.0692	0.30086	0.15523	0.10926	0.34991	0.02502
1887.3	-0.46446	-0.37072	0.00012	0.07013	0.30181	0.15426	0.10776	0.3499	0.02646
1885.88	-0.46318	-0.3688	0	0.07107	0.30286	0.15363	0.10722	0.35019	0.0279
1884.45	-0.46166	-0.36752	0	0.07208	0.30406	0.15312	0.10656	0.35128	0.02916
1883.02	-0.46006	-0.36648	0	0.07315	0.30525	0.15247	0.10536	0.35262	0.03036
1881.59	-0.45846	-0.3656	0.00016	0.07429	0.30628	0.15159	0.10389	0.35377	0.03156
1880.17	-0.45718	-0.36488	0.00038	0.07541	0.30717	0.15053	0.10239	0.35473	0.0327
1878.74	-0.45638	-0.36416	0.00062	0.07643	0.30799	0.14935	0.10086	0.35553	0.0336
1877.31	-0.45654	-0.36336	0.00084	0.0772	0.30875	0.14804	0.09918	0.35606	0.03426
1875.88	-0.45814	-0.3628	0.00106	0.07765	0.30929	0.14659	0.09747	0.35619	0.03438
1874.45	-0.46062	-0.36312	0.00128	0.07779	0.30936	0.14494	0.09564	0.35617	0.03378
1873.03	-0.4631	-0.36536	0.00158	0.07768	0.30896	0.14304	0.09342	0.35685	0.0321
1871.6	-0.46494	-0.36984	0.00196	0.07752	0.30825	0.14084	0.09027	0.35883	0.02946
1870.17	-0.46574	-0.37448	0.00232	0.07731	0.30714	0.13823	0.08574	0.36098	0.02628
1868.74	-0.46558	-0.3756	0.00258	0.0768	0.30524	0.13514	0.08061	0.36035	0.0237
1867.32	-0.46454	-0.372	0.00268	0.07584	0.30242	0.1321	0.07704	0.3554	0.0222
1865.89	-0.46246	-0.3664	0.00266	0.0744	0.29918	0.12972	0.07629	0.34822	0.02124
1864.46	-0.4595	-0.36224	0.00254	0.07283	0.296	0.12787	0.07692	0.34159	0.01974
1863.03	-0.45606	-0.36024	0.00236	0.07125	0.29292	0.12596	0.07701	0.33639	0.01752
1861.61	-0.45294	-0.35952	0.0023	0.06963	0.2898	0.1237	0.07593	0.33212	0.0147
1860.18	-0.45102	-0.35896	0.00252	0.06787	0.28659	0.12119	0.07413	0.32799	0.01188
1858.75	-0.45038	-0.35824	0.00298	0.06597	0.28335	0.11857	0.07203	0.32361	0.0093
1857.32	-0.4503	-0.35744	0.00352	0.064	0.28005	0.11593	0.06993	0.31895	0.00708
1855.9	-0.45022	-0.35696	0.00404	0.06197	0.27668	0.11322	0.06789	0.31427	0.0051
1854.47	-0.45014	-0.35696	0.00458	0.05997	0.27341	0.11043	0.06597	0.3099	0.00342
1853.04	-0.45094	-0.35728	0.00534	0.058	0.27045	0.10757	0.06417	0.30617	0.00204
1851.61	-0.45318	-0.35808	0.00642	0.05608	0.26785	0.10471	0.06234	0.30341	0.00096
1850.19	-0.45646	-0.35968	0.00772	0.05427	0.26556	0.10197	0.06024	0.3018	0.0003
1848.76	-0.45966	-0.36272	0.00902	0.05261	0.26369	0.09934	0.05769	0.30128	0
1847.33	-0.46206	-0.36744	0.01022	0.05112	0.2624	0.09675	0.05478	0.30169	0.00012
1845.9	-0.46334	-0.37248	0.0115	0.04976	0.26149	0.09411	0.05163	0.30224	0.0006
1844.48	-0.4635	-0.37376	0.01296	0.04837	0.26036	0.09143	0.04857	0.30105	0.0012
1843.05	-0.46246	-0.36936	0.01462	0.04691	0.25872	0.08906	0.04671	0.29717	0.00162
1841.62	-0.46006	-0.36304	0.01648	0.04552	0.25703	0.08749	0.04683	0.29253	0.00186
1840.19	-0.4567	-0.3592	0.01852	0.0444	0.25574	0.08654	0.04785	0.28937	0.0021
1838.76	-0.45342	-0.35808	0.02064	0.04355	0.25489	0.08565	0.0483	0.28794	0.00258
1837.34	-0.4515	-0.35768	0.02268	0.04283	0.25435	0.08456	0.04791	0.28722	0.00312
1835.91	-0.45174	-0.3568	0.02458	0.04219	0.25402	0.08343	0.04722	0.2865	0.00366
1834.48	-0.45382	-0.3568	0.02634	0.0416	0.25395	0.08252	0.04668	0.28633	0.0042
1833.05	-0.45678	-0.35968	0.028	0.04112	0.25432	0.08182	0.04599	0.28782	0.00486
1831.63	-0.4595	-0.36456	0.02962	0.04077	0.25505	0.08103	0.04452	0.29089	0.0057
1830.2	-0.46142	-0.36784	0.03124	0.04056	0.25563	0.08005	0.04239	0.29347	0.00642
1828.77	-0.46198	-0.36736	0.033	0.04035	0.25568	0.0792	0.04068	0.29368	0.00672
1827.34	-0.4611	-0.36528	0.03506	0.04011	0.25547	0.07883	0.04026	0.29235	0.00678
1825.92	-0.45894	-0.36352	0.03742	0.03984	0.25531	0.07884	0.04062	0.29088	0.00684
1824.49	-0.45558	-0.36128	0.0398	0.0396	0.25509	0.07895	0.04113	0.28912	0.00678
1823.06	-0.45182	-0.35784	0.04194	0.03931	0.25465	0.07912	0.04191	0.28686	0.00654
1821.63	-0.44838	-0.35472	0.04378	0.03896	0.2541	0.07938	0.04305	0.28489	0.00636
1820.21	-0.44606	-0.35296	0.04534	0.03861	0.25364	0.07963	0.04401	0.28385	0.00636
1818.78	-0.44486	-0.3524	0.04666	0.03832	0.25333	0.07975	0.04434	0.28347	0.00672
1817.35	-0.4447	-0.35224	0.04784	0.03811	0.25316	0.07974	0.04416	0.28313	0.00714
1815.92	-0.44542	-0.35216	0.04894	0.03781	0.25312	0.07964	0.04386	0.28278	0.00762
1814.5	-0.4463	-0.35288	0.05004	0.03749	0.25321	0.07942	0.04344	0.28299	0.00822
1813.07	-0.44678	-0.35432	0.05122	0.03712	0.25334	0.07907	0.04272	0.28397	0.00894
1811.64	-0.44662	-0.35576	0.05248	0.0368	0.25323	0.07857	0.04164	0.28483	0.00972
1810.21	-0.4463	-0.3556	0.05376	0.0364	0.25261	0.07799	0.04056	0.28429	0.01032
1808.78	-0.4463	-0.35392	0.05516	0.03587	0.25153	0.07746	0.04002	0.28227	0.01068
1807.36	-0.44678	-0.352	0.05676	0.03525	0.25038	0.07702	0.04002	0.27999	0.01104
1805.93	-0.44734	-0.35176	0.0584	0.03464	0.2495	0.07655	0.04005	0.27859	0.0117
1804.5	-0.44766	-0.35384	0.05982	0.03411	0.24893	0.07592	0.03957	0.27851	0.01284
1803.07	-0.44782	-0.35728	0.0609	0.0336	0.24849	0.07508	0.0384	0.2794	0.0144
1801.65	-0.44846	-0.35992	0.06166	0.03312	0.24793	0.07405	0.03672	0.28013	0.01596
1800.22	-0.4503	-0.35968	0.06218	0.03253	0.2471	0.07291	0.03519	0.27957	0.01722
1798.79	-0.45302	-0.35744	0.0625	0.03179	0.24609	0.07183	0.03438	0.27786	0.01806
1797.36	-0.45558	-0.35608	0.06272	0.03109	0.24509	0.07089	0.03414	0.27639	0.0189
1795.94	-0.4567	-0.35824	0.06302	0.03056	0.24429	0.06991	0.03375	0.27636	0.02028
1794.51	-0.45654	-0.36368	0.06344	0.03013	0.24374	0.06869	0.03264	0.27767	0.02226
1793.08	-0.45542	-0.36808	0.06394	0.02968	0.24312	0.06719	0.03075	0.27842	0.02448
1791.65	-0.45406	-0.36592	0.06434	0.02909	0.24196	0.06567	0.02898	0.27617	0.02574
1790.23	-0.45222	-0.35832	0.06464	0.02837	0.24034	0.06466	0.02877	0.27136	0.02568
1788.8	-0.44982	-0.35144	0.065	0.02765	0.23879	0.06424	0.03009	0.26687	0.02544
1787.37	-0.44678	-0.34872	0.0656	0.02712	0.23757	0.06392	0.03138	0.26434	0.02586
1785.94	-0.44358	-0.3488	0.0666	0.02669	0.23657	0.06336	0.03153	0.26351	0.02724
1784.52	-0.44086	-0.34912	0.06794	0.02635	0.23571	0.06255	0.03075	0.2635	0.02898
1783.09	-0.43934	-0.34872	0.06952	0.02605	0.23498	0.06166	0.0297	0.26374	0.03078
1781.66	-0.43934	-0.34816	0.07108	0.02581	0.23433	0.06078	0.0288	0.26374	0.03222
1780.23	-0.4407	-0.3472	0.0725	0.02555	0.23364	0.05991	0.02811	0.26297	0.0333
1778.8	-0.4435	-0.346	0.07384	0.02523	0.23298	0.05911	0.02772	0.26172	0.03414
1777.38	-0.44726	-0.34648	0.07524	0.02493	0.23258	0.0584	0.02754	0.26136	0.03528
1775.95	-0.45118	-0.35096	0.07686	0.02467	0.23255	0.05765	0.02703	0.26301	0.03726
1774.52	-0.45446	-0.35928	0.07868	0.02451	0.23272	0.05663	0.02556	0.26639	0.04032
1773.09	-0.45622	-0.36688	0.08052	0.0244	0.23268	0.05528	0.02316	0.26929	0.04356
1771.67	-0.45622	-0.368	0.08212	0.02427	0.232	0.05395	0.021	0.26892	0.04542
1770.24	-0.45478	-0.36248	0.0833	0.02403	0.23081	0.05322	0.02049	0.26533	0.0453
1768.81	-0.45198	-0.35472	0.08406	0.02376	0.22951	0.05318	0.02157	0.26087	0.04428
1767.38	-0.44798	-0.34776	0.08462	0.02349	0.22834	0.05338	0.02307	0.25707	0.04332
1765.96	-0.44342	-0.34368	0.08534	0.02325	0.22751	0.05345	0.0243	0.25477	0.0429
1764.53	-0.43958	-0.34376	0.0864	0.02307	0.22716	0.05328	0.02487	0.25448	0.04344
1763.1	-0.43718	-0.34648	0.08784	0.02291	0.22706	0.05283	0.02451	0.25547	0.04476
1761.67	-0.4359	-0.3476	0.08944	0.0228	0.22674	0.0522	0.02352	0.25591	0.04602
1760.25	-0.43518	-0.346	0.09102	0.02269	0.22617	0.05166	0.0228	0.2552	0.04656
1758.82	-0.43534	-0.344	0.09252	0.02259	0.22563	0.05134	0.02277	0.25436	0.04692
1757.39	-0.43662	-0.34272	0.09412	0.02251	0.22514	0.05109	0.0228	0.25368	0.04734
1755.96	-0.43862	-0.3416	0.09596	0.02237	0.2246	0.05082	0.02268	0.25285	0.04782
1754.54	-0.44102	-0.34224	0.09802	0.02221	0.22433	0.05057	0.02253	0.25276	0.04866
1753.11	-0.44342	-0.3468	0.1001	0.02211	0.22465	0.05025	0.02211	0.25488	0.05064
1751.68	-0.44542	-0.35368	0.102	0.02208	0.22533	0.04966	0.02082	0.259	0.05388
1750.25	-0.44654	-0.35768	0.10384	0.02216	0.22565	0.04878	0.01875	0.26246	0.0567
1748.83	-0.44686	-0.35576	0.1057	0.02229	0.22513	0.04795	0.01707	0.26263	0.05754
1747.4	-0.4463	-0.35032	0.10756	0.02229	0.22415	0.04757	0.01683	0.26015	0.05688
1745.97	-0.44422	-0.34512	0.10942	0.02219	0.22331	0.04758	0.01767	0.25733	0.05592
1744.54	-0.4407	-0.34232	0.11122	0.02208	0.2228	0.04767	0.01854	0.25547	0.05538
1743.11	-0.43726	-0.34208	0.11278	0.02192	0.22244	0.04766	0.01896	0.25456	0.05532
1741.69	-0.43646	-0.34328	0.11388	0.02176	0.22198	0.04752	0.01887	0.25405	0.05568
1740.26	-0.4387	-0.34336	0.11448	0.02163	0.22133	0.04731	0.0186	0.25332	0.0561
1738.83	-0.4423	-0.34224	0.11456	0.02155	0.22068	0.04714	0.01842	0.25249	0.0564
1737.4	-0.44526	-0.344	0.11408	0.02147	0.22039	0.04704	0.01836	0.25281	0.0573
1735.98	-0.44622	-0.35096	0.11316	0.02136	0.22059	0.04679	0.0177	0.25521	0.0597
1734.55	-0.44494	-0.35728	0.1123	0.02128	0.22082	0.04617	0.01593	0.25788	0.0627
1733.12	-0.44142	-0.354	0.1121	0.0212	0.22039	0.04544	0.0141	0.25715	0.06312
1731.69	-0.43614	-0.3432	0.11274	0.02117	0.21942	0.04532	0.01419	0.25306	0.0606
1730.27	-0.42934	-0.33264	0.11388	0.02109	0.21831	0.04583	0.01605	0.24829	0.0576
1728.84	-0.4211	-0.32496	0.11516	0.02096	0.21721	0.04643	0.01815	0.2441	0.05508
1727.41	-0.41286	-0.31992	0.11622	0.02077	0.21631	0.04688	0.01977	0.2412	0.05346
1725.98	-0.40782	-0.31736	0.11696	0.02064	0.2158	0.04711	0.02073	0.23999	0.05286
1724.56	-0.40862	-0.31648	0.11738	0.02053	0.21554	0.04711	0.021	0.23991	0.0531
1723.13	-0.41406	-0.31696	0.11764	0.02048	0.21536	0.04693	0.02076	0.24032	0.05406
1721.7	-0.42118	-0.32112	0.11778	0.02048	0.21541	0.04668	0.02022	0.24184	0.05592
1720.27	-0.4275	-0.33104	0.11776	0.02048	0.2159	0.04628	0.01914	0.24564	0.05946
1718.85	-0.43126	-0.34384	0.11758	0.02048	0.21661	0.04555	0.01686	0.25116	0.06438
1717.42	-0.4319	-0.35024	0.11764	0.02053	0.21662	0.04445	0.01362	0.25449	0.06792
1715.99	-0.4295	-0.34432	0.1183	0.02067	0.21533	0.04356	0.01134	0.25208	0.06696
1714.56	-0.42502	-0.33168	0.1195	0.02069	0.21339	0.04361	0.01197	0.24618	0.06318
1713.13	-0.41902	-0.32016	0.12102	0.02053	0.21156	0.04432	0.01449	0.2405	0.05952
1711.71	-0.41214	-0.31312	0.12256	0.02035	0.21014	0.04504	0.01695	0.23667	0.05736
1710.28	-0.40614	-0.31088	0.12372	0.02021	0.20929	0.04547	0.01836	0.23521	0.05706
1708.85	-0.40382	-0.31288	0.12414	0.02016	0.20897	0.04554	0.01857	0.23617	0.0585
1707.42	-0.40694	-0.31712	0.12376	0.02019	0.20877	0.04526	0.0177	0.2385	0.0609
1706	-0.41414	-0.32056	0.12272	0.02021	0.20818	0.04473	0.01623	0.24006	0.063
1704.57	-0.42286	-0.3232	0.1211	0.02021	0.20715	0.04423	0.015	0.24004	0.06414
1703.14	-0.43094	-0.32872	0.11908	0.02019	0.20609	0.04394	0.01425	0.24016	0.06534
1701.71	-0.43646	-0.33824	0.11714	0.02011	0.20515	0.04363	0.01326	0.2418	0.06792
1700.29	-0.4379	-0.3452	0.11582	0.02003	0.20423	0.04306	0.01146	0.2435	0.07122

## Sheet: Figure 1c
energy	0.5wt%Re/TiO2	5.0wt%Re/TiO2	12.0wt%Re/TiO2	Re_foil
10337	0.03239	0.01955	0.01367	0.01447
10341.6	0.03134	0.01691	0.01236	0.01385
10346.7	0.02805	0.01731	0.01195	0.01317
10351.5	0.02689	0.01409	0.00992	0.01207
10356.7	0.02446	0.01343	0.00922	0.01183
10361.4	0.02272	0.01	0.00725	0.01073
10366.8	0.02064	0.00949	0.00716	0.01009
10371.5	0.01902	0.00661	0.00518	0.00897
10376.8	0.0177	0.00736	0.0052	0.00792
10381.8	0.01483	0.00624	0.00408	0.00684
10386.6	0.01349	0.00547	0.0039	0.00601
10391.8	0.01223	0.00465	0.00326	0.00449
10396.6	0.00955	0.00323	0.00279	0.00389
10401.7	0.00841	0.00246	0.00238	0.00332
10406.6	0.00553	0.00131	0.00109	0.00245
10411.7	0.00463	0.00192	0.0012	0.00224
10416.6	0.0032	0.000258597	7.17481e-05	0.00102
10421.7	0.000888539	0.00022278	-9.20449e-05	0.00084689
10426.4	-0.000814594	-0.00185	-0.00136	-0.000595255
10431.7	-0.00242	-0.00204	-0.00114	-0.000907521
10436.4	-0.00441	-0.00342	-0.00226	-0.00254
10441.8	-0.00555	-0.00236	-0.00198	-0.00269
10446.5	-0.00634	-0.00469	-0.00326	-0.00349
10451.8	-0.00801	-0.00317	-0.00269	-0.00379
10456.7	-0.00775	-0.00406	-0.00305	-0.00411
10461.7	-0.01078	-0.00308	-0.0025	-0.0039
10466.9	-0.01122	-0.00289	-0.00248	-0.00423
10471.6	-0.01068	-0.00193	-0.0023	-0.00375
10476.8	-0.01048	-0.00101	-0.00167	-0.00394
10481.6	-0.01039	-0.000227352	-0.000857853	-0.00365
10486.7	-0.01004	0.000922827	0.000840595	-0.00324
10491.6	-0.00839	0.00213	0.00224	-0.00202
10496.6	-0.00533	0.00557	0.00482	-0.000539356
10501.6	6.54925e-05	0.00887	0.00792	0.00277
10506.7	0.00781	0.01553	0.01331	0.00755
10511.5	0.01909	0.02113	0.01998	0.01608
10511.8	0.02003	0.02147	0.02043	0.01667
10512.1	0.02119	0.02209	0.021	0.01736
10512.4	0.02144	0.02282	0.02165	0.01812
10512.7	0.02393	0.02351	0.02236	0.01884
10513	0.02496	0.02424	0.02293	0.01956
10513.4	0.02591	0.02488	0.02364	0.02038
10513.6	0.02579	0.02554	0.02442	0.02107
10513.9	0.02721	0.02668	0.02522	0.02179
10514.3	0.02827	0.02772	0.02586	0.02256
10514.6	0.0287	0.02844	0.02643	0.02325
10514.9	0.0295	0.02957	0.02718	0.02398
10515.2	0.03035	0.03046	0.02817	0.02466
10515.4	0.03114	0.03082	0.02871	0.02535
10515.7	0.03324	0.03154	0.02967	0.02605
10516	0.03334	0.0326	0.03065	0.02675
10516.3	0.0341	0.0336	0.03132	0.02742
10516.6	0.03621	0.03358	0.03233	0.02816
10516.9	0.03671	0.03372	0.03335	0.02892
10517.2	0.03909	0.03432	0.03426	0.03005
10517.5	0.04083	0.03574	0.03528	0.03118
10517.8	0.04289	0.0373	0.03686	0.03247
10518.1	0.04469	0.03772	0.03772	0.03351
10518.4	0.04651	0.03854	0.03878	0.03462
10518.7	0.04888	0.0396	0.03994	0.03575
10519	0.05087	0.04071	0.04149	0.03717
10519.3	0.05202	0.04164	0.04263	0.0386
10519.6	0.05389	0.04301	0.04389	0.04026
10519.9	0.05523	0.04439	0.04509	0.04213
10520.2	0.05754	0.04596	0.04676	0.04462
10520.5	0.05917	0.04744	0.04829	0.04684
10520.8	0.06129	0.04927	0.0503	0.04948
10521.1	0.06433	0.05099	0.05216	0.05174
10521.4	0.06702	0.05269	0.05401	0.05415
10521.7	0.06973	0.05468	0.05629	0.05578
10522	0.0737	0.05659	0.05826	0.05731
10522.3	0.0759	0.05873	0.06047	0.05917
10522.6	0.07911	0.06096	0.06272	0.06091
10522.9	0.08338	0.06308	0.06456	0.06244
10523.2	0.08562	0.06488	0.06623	0.06425
10523.6	0.08912	0.06763	0.06843	0.06642
10523.9	0.09127	0.07027	0.07045	0.06816
10524.2	0.09302	0.07242	0.0727	0.07049
10524.5	0.09464	0.07378	0.07465	0.07265
10524.8	0.0968	0.07596	0.07693	0.07533
10525	0.09991	0.07889	0.07945	0.0785
10525.3	0.10162	0.08168	0.08218	0.08184
10525.6	0.10636	0.0846	0.08557	0.08617
10525.9	0.10912	0.08726	0.0889	0.09008
10526.2	0.11456	0.09184	0.09357	0.09559
10526.5	0.12129	0.09579	0.0981	0.10051
10526.8	0.12561	0.10013	0.10225	0.10552
10527.1	0.1326	0.10529	0.10724	0.11052
10527.4	0.14047	0.11096	0.1128	0.11581
10527.7	0.14714	0.11574	0.11778	0.12007
10528	0.15339	0.12068	0.12361	0.12485
10528.3	0.16197	0.12608	0.12905	0.13015
10528.6	0.17047	0.13253	0.1359	0.13718
10528.9	0.17744	0.13856	0.1415	0.14386
10529.2	0.1863	0.14524	0.14799	0.15333
10529.5	0.19296	0.15172	0.15504	0.1637
10529.8	0.20239	0.15866	0.16268	0.17421
10530.1	0.21136	0.16816	0.17365	0.18927
10530.4	0.22102	0.17813	0.18448	0.20147
10530.7	0.23377	0.19001	0.19632	0.21392
10531	0.2484	0.20305	0.21024	0.22552
10531.3	0.26502	0.21897	0.2273	0.23738
10531.6	0.28392	0.23411	0.24285	0.24842
10531.9	0.30486	0.24994	0.25967	0.26035
10532.2	0.32509	0.26336	0.27426	0.27245
10532.6	0.34651	0.27963	0.29093	0.28776
10532.9	0.36283	0.29397	0.30504	0.30132
10533.1	0.37963	0.3076	0.31886	0.31711
10533.5	0.39567	0.32286	0.33527	0.33572
10533.8	0.41188	0.33813	0.35223	0.35633
10534.1	0.4279	0.35602	0.37243	0.38504
10534.4	0.44663	0.3755	0.39405	0.41902
10534.6	0.46505	0.39658	0.41781	0.45819
10534.9	0.48778	0.42439	0.45083	0.50553
10535.2	0.51407	0.46101	0.49388	0.56106
10535.5	0.54521	0.50413	0.54308	0.62045
10535.8	0.58556	0.55658	0.60169	0.68313
10536.1	0.63536	0.6184	0.67074	0.76117
10536.4	0.68436	0.68298	0.74285	0.83681
10536.7	0.75421	0.77213	0.84149	0.93174
10537	0.82232	0.86395	0.94196	1.02325
10537.3	0.89551	0.95919	1.04487	1.11295
10537.6	0.97232	1.063	1.15764	1.21166
10537.9	1.07124	1.19761	1.29738	1.33522
10538.2	1.15136	1.30895	1.41812	1.45
10538.5	1.23696	1.42776	1.53852	1.58045
10538.8	1.32167	1.56663	1.68246	1.90557
10539.1	1.52648	1.70628	1.82606	2.1252
10539.5	1.73713	1.88148	2.00602	2.3458
10539.7	1.90697	2.04116	2.16118	2.50656
10540	2.11886	2.23273	2.3548	2.6413
10540.3	2.34405	2.4291	2.53539	2.7591
10540.6	2.56252	2.61991	2.70826	2.81276
10540.9	2.75569	2.78142	2.83787	2.86032
10541.2	2.92397	2.91145	2.93987	2.88074
10541.5	3.04338	3.00611	3.00353	2.88716
10541.8	3.11694	3.06648	3.04167	2.88199
10542.1	3.1635	3.10902	3.06613	2.86473
10542.4	3.18126	3.13032	3.07345	2.83592
10542.8	3.18759	3.14145	3.07163	2.79103
10543	3.18586	3.14164	3.06371	2.742
10543.3	3.17484	3.13607	3.04738	2.67362
10543.7	3.15738	3.11924	3.01648	2.56185
10544	3.14154	3.09738	2.98684	2.46903
10544.2	3.11423	3.05808	2.93589	2.34675
10544.5	3.08201	2.99816	2.86707	2.23251
10544.8	3.03613	2.91581	2.77285	2.12155
10545.1	2.966	2.78732	2.62683	1.9981
10545.4	2.87917	2.64947	2.48735	1.90083
10545.7	2.77105	2.50154	2.34015	1.8156
10546	2.63864	2.35479	2.20018	1.74273
10546.3	2.48988	2.19754	2.05654	1.67135
10546.6	2.31123	2.02746	1.90309	1.60391
10546.9	2.16909	1.90706	1.79566	1.55374
10547.2	2.01558	1.79975	1.69964	1.51217
10547.5	1.86926	1.70214	1.61491	1.47117
10547.8	1.74235	1.61987	1.54654	1.43361
10548.1	1.62756	1.54734	1.48229	1.39929
10548.4	1.5326	1.48969	1.43151	1.36981
10548.7	1.45376	1.43642	1.38643	1.34383
10549	1.37987	1.38956	1.34194	1.32211
10549.3	1.31393	1.34655	1.3023	1.30169
10549.6	1.28546	1.30041	1.26182	1.28855
10549.9	1.25784	1.26558	1.23244	1.27857
10550.2	1.2311	1.23569	1.20829	1.27037
10550.5	1.20676	1.21305	1.18965	1.26396
10550.8	1.18536	1.19511	1.17522	1.25921
10551.1	1.16525	1.18203	1.16571	1.25508
10551.4	1.1525	1.17376	1.15896	1.25141
10551.7	1.14016	1.16698	1.15435	1.24857
10552	1.13195	1.16238	1.15157	1.24597
10552.3	1.12692	1.1593	1.14917	1.24375
10552.6	1.12184	1.15623	1.14705	1.24213
10553	1.11629	1.15381	1.14548	1.24058
10553.3	1.11152	1.1516	1.14396	1.23868
10553.6	1.10939	1.14889	1.14285	1.23766
10553.9	1.10434	1.14683	1.14148	1.23692
10554.1	1.10227	1.14492	1.14015	1.23554
10554.4	1.0979	1.14229	1.13873	1.2335
10554.7	1.09472	1.1397	1.13648	1.23079
10555	1.09168	1.13699	1.13353	1.2266
10555.3	1.08737	1.13299	1.1304	1.22191
10555.6	1.08387	1.12737	1.12585	1.21575
10555.9	1.08041	1.1215	1.12027	1.20949
10556.2	1.07575	1.11442	1.11379	1.20168
10556.5	1.07316	1.10739	1.10615	1.19415
10556.8	1.06997	1.10009	1.09846	1.1863
10557.1	1.06522	1.09246	1.0902	1.17673
10557.4	1.06065	1.08465	1.0824	1.16637
10557.7	1.05714	1.07616	1.074	1.154
10558	1.05276	1.06899	1.06686	1.14115
10558.3	1.04735	1.06172	1.05878	1.12739
10558.6	1.04333	1.05424	1.05047	1.11308
10558.9	1.04069	1.04671	1.04209	1.10064
10559.2	1.03528	1.03714	1.03139	1.08626
10559.5	1.03038	1.02761	1.02167	1.07642
10559.8	1.02506	1.01911	1.01363	1.06799
10560.1	1.02003	1.01079	1.00607	1.06121
10560.4	1.01545	1.00427	1.00051	1.05595
10560.7	1.00989	0.99845	0.99506	1.05179
10561	1.00498	0.99437	0.9915	1.04776
10561.4	1.00122	0.99031	0.98825	1.04281
10561.6	0.99789	0.98776	0.98611	1.04011
10561.9	0.99739	0.9861	0.98431	1.03744
10562.3	0.99405	0.98481	0.98251	1.03465
10562.6	0.99274	0.98336	0.98095	1.03254
10562.9	0.99092	0.98196	0.97959	1.03105
10563.2	0.9896	0.98033	0.97784	1.02948
10563.5	0.98803	0.97923	0.97659	1.02917
10563.8	0.98692	0.97747	0.97506	1.02984
10564	0.985	0.97598	0.9734	1.03067
10564.3	0.98273	0.97376	0.97145	1.03166
10564.6	0.98151	0.97138	0.96978	1.03336
10564.9	0.97862	0.9688	0.96755	1.03547
10565.2	0.97639	0.96684	0.96569	1.03776
10565.5	0.97504	0.96511	0.96414	1.03942
10565.8	0.97273	0.96355	0.96256	1.04097
10566.1	0.97104	0.9619	0.96049	1.04279
10566.4	0.96977	0.95965	0.95884	1.04448
10566.7	0.9671	0.95751	0.95741	1.0455
10567	0.9664	0.95581	0.95582	1.04658
10567.3	0.965	0.95482	0.95436	1.04756
10567.6	0.96374	0.95385	0.95321	1.04783
10567.9	0.962	0.95269	0.9517	1.04779
10568.2	0.96016	0.95114	0.9503	1.04728
10568.5	0.95898	0.94886	0.94866	1.04575
10568.8	0.95881	0.9465	0.94654	1.04389
10569.1	0.95711	0.94441	0.94459	1.04222
10569.4	0.95578	0.94235	0.94246	1.04043
10569.7	0.95458	0.94064	0.94093	1.03881
10570	0.95438	0.93867	0.93877	1.03727
10570.3	0.95284	0.93686	0.93722	1.0359
10570.6	0.95217	0.93535	0.93641	1.03432
10570.9	0.9506	0.93422	0.93602	1.03228
10571.2	0.94965	0.93375	0.9355	1.03119
10571.6	0.94948	0.93358	0.93518	1.02957
10571.9	0.94993	0.93353	0.9349	1.02778
10573.1	0.94902	0.93284	0.93401	1.01939
10573.9	0.949	0.93126	0.93339	1.01327
10574.8	0.94848	0.92963	0.93301	1.0065
10575.8	0.94946	0.92894	0.9339	1.00058
10576.9	0.95057	0.92997	0.93576	0.99351
10577.9	0.95301	0.93212	0.93797	0.98399
10578.8	0.95587	0.93426	0.94052	0.97351
10579.8	0.96093	0.93734	0.94369	0.96742
10580.9	0.96553	0.94168	0.94782	0.96326
10582	0.97075	0.94672	0.95252	0.95999
10582.9	0.97369	0.9514	0.95678	0.95879
10583.9	0.97822	0.95744	0.96224	0.96041
10584.8	0.98407	0.96363	0.96813	0.96455
10585.8	0.99071	0.97018	0.97463	0.96938
10586.8	0.99626	0.97638	0.98066	0.97578
10587.9	1.00163	0.98264	0.98677	0.9827
10588.8	1.00654	0.9881	0.99184	0.98744
10589.8	1.01074	0.99277	0.99624	0.99076
10590.9	1.01296	0.99702	1.00039	0.99368
10592.1	1.01399	1.00054	1.00362	0.99685
10592.9	1.01424	1.00242	1.00541	0.99889
10593.9	1.01514	1.00419	1.00688	1.00105
10594.8	1.01488	1.00518	1.00731	1.00279
10595.9	1.01317	1.00574	1.00735	1.0045
10596.9	1.0119	1.00596	1.00747	1.00623
10597.8	1.01033	1.00567	1.00678	1.0085
10598.8	1.00957	1.0045	1.00551	1.01125
10599.8	1.00813	1.00392	1.00521	1.01347
10600.9	1.00747	1.00507	1.00563	1.01614
10602.1	1.00658	1.00663	1.00573	1.01904
10602.9	1.00589	1.00699	1.00528	1.01725
10603.8	1.00543	1.00632	1.00421	1.01531
10604.8	1.00432	1.00487	1.00277	1.01471
10605.8	1.0045	1.00395	1.00169	1.0143
10606.9	1.00381	1.00389	1.00099	1.01472
10607.9	1.00221	1.00346	0.99976	1.01443
10608.8	1.00236	1.00221	0.99814	1.01302
10609.8	1.00095	1.00136	0.99701	1.0112
10610.9	1.00092	1.00147	0.99691	1.01012
10612	0.9995	1.00169	0.99688	1.00831
10612.9	1.00011	1.00128	0.9961	1.00625
10613.8	0.99986	1.00031	0.99463	1.00376
10614.9	0.99856	0.9994	0.99313	1.00135
10615.9	0.99858	0.99838	0.99209	0.99896
10616.9	0.99802	0.9974	0.99107	0.99647
10617.8	0.99735	0.99588	0.98992	0.99422
10618.8	0.99642	0.99401	0.98864	0.99134
10619.9	0.99666	0.99351	0.98818	0.98758
10621.1	0.99568	0.99445	0.98836	0.98425
10621.9	0.99464	0.99491	0.9882	0.98101
10622.9	0.99473	0.9941	0.98732	0.97649
10623.8	0.9943	0.99253	0.9864	0.97338
10624.8	0.99376	0.99122	0.98555	0.97083
10625.9	0.99389	0.99062	0.98522	0.967
10626.8	0.99422	0.99042	0.98527	0.96316
10627.8	0.99351	0.98957	0.98461	0.96137
10628.8	0.9932	0.98872	0.9842	0.96105
10629.9	0.99406	0.9889	0.98476	0.96184
10631.1	0.99334	0.98959	0.9858	0.96466
10631.9	0.99348	0.99034	0.98614	0.96734
10632.9	0.99342	0.99062	0.98626	0.97082
10633.8	0.99332	0.98988	0.98596	0.97358
10634.8	0.99313	0.98938	0.98598	0.97596
10635.9	0.99387	0.98908	0.9863	0.97936
10636.9	0.99323	0.98839	0.98646	0.98285
10637.8	0.99397	0.98741	0.98607	0.98514
10638.8	0.99461	0.98697	0.98613	0.98685
10639.9	0.99435	0.98771	0.98695	0.98867
10641.1	0.99508	0.98877	0.98797	0.99084
10641.9	0.99586	0.98883	0.98848	0.99398
10642.8	0.99667	0.98811	0.98849	0.9999
10643.8	0.9963	0.98754	0.98822	1.00184
10644.8	0.99642	0.9876	0.98827	0.99843
10645.9	0.99662	0.98766	0.98855	0.99666
10646.9	0.99625	0.98713	0.98812	0.99754
10647.8	0.99661	0.98598	0.98757	0.99851
10648.8	0.99578	0.98542	0.98775	0.99913
10649.9	0.99646	0.98622	0.98871	1.00001
10651.1	0.99567	0.98797	0.98964	1.00119
10651.8	0.99574	0.98838	0.98987	1.00191
10652.8	0.99518	0.9882	0.99007	1.00311
10653.8	0.99507	0.98762	0.99031	1.00441
10654.8	0.99492	0.98748	0.9908	1.00604
10655.9	0.99564	0.98784	0.99144	1.00828
10656.9	0.99558	0.98771	0.99189	1.01127
10657.8	0.99378	0.98768	0.99219	1.01396
10658.8	0.99621	0.98836	0.99289	1.01664
10660	0.99482	0.98986	0.9945	1.02179
10661	0.99553	0.99164	0.99584	1.02932
10661.9	0.9944	0.99205	0.99639	1.02956
10662.8	0.99484	0.99189	0.99667	1.02699
10663.8	0.99401	0.99197	0.99687	1.02657
10664.9	0.99431	0.99238	0.99721	1.02792
10665.9	0.99432	0.9927	0.99749	1.02894
10666.9	0.99369	0.99203	0.99729	1.02933
10667.8	0.99385	0.99102	0.99691	1.02943
10668.8	0.99317	0.99121	0.99705	1.02924
10670	0.99318	0.99291	0.99786	1.02866
10670.9	0.9923	0.99381	0.99827	1.02744
10671.9	0.9917	0.9938	0.99798	1.0253
10672.8	0.9917	0.99309	0.99714	1.02285
10673.8	0.99118	0.99225	0.99636	1.02008
10674.9	0.9921	0.99206	0.99609	1.0164
10675.9	0.99202	0.99217	0.99592	1.01101
10676.8	0.99181	0.99153	0.99471	1.00561
10677.8	0.99242	0.9905	0.99351	1.00121
10678.9	0.99215	0.9902	0.99325	0.99717
10680	0.99143	0.99118	0.99354	0.99246
10680.9	0.99095	0.99221	0.99374	0.98752
10681.9	0.9914	0.99229	0.99328	0.98179
10683.8	0.99216	0.9913	0.99196	0.97444
10685.9	0.99162	0.99097	0.99095	0.97024
10687.8	0.99187	0.99003	0.9903	0.974
10690	0.99247	0.99141	0.99095	0.97761
10692.1	0.99281	0.99311	0.99177	0.97493
10693.8	0.99328	0.99312	0.99147	0.97728
10695.9	0.99409	0.99358	0.99187	0.98214
10697.8	0.99499	0.99384	0.99222	0.98497
10700	0.99525	0.99553	0.99352	0.98776
10702.1	0.99658	0.99704	0.99492	0.99012
10703.8	0.99776	0.99729	0.99521	0.99229
10705.9	0.99887	0.99884	0.9961	0.99811
10707.8	1.00004	0.99897	0.99662	1.00248
10710	1.00042	1.00158	0.9982	1.00048
10712	1.00149	1.00316	0.9996	1.00185
10713.8	1.00286	1.00305	1.00024	1.00334
10715.9	1.00406	1.00355	1.00158	1.00468
10717.8	1.00488	1.00392	1.00244	1.00533
10720	1.00707	1.00638	1.00458	1.00642
10722	1.00635	1.00782	1.00592	1.00765
10723.8	1.00741	1.0075	1.00656	1.01029
10725.9	1.00806	1.00782	1.00765	1.01476
10727.7	1.00822	1.00785	1.00807	1.0187
10730.1	1.009	1.00997	1.00983	1.02329
10731.9	1.00815	1.01118	1.01074	1.0269
10733.8	1.00814	1.01038	1.0103	1.02976
10735.9	1.0081	1.00914	1.00977	1.03049
10737.8	1.00769	1.00692	1.00894	1.02819
10740.1	1.00696	1.00745	1.00904	1.02415
10741.9	1.00626	1.00752	1.00868	1.01771
10743.8	1.00443	1.00585	1.00733	1.01159
10745.9	1.00456	1.00461	1.00584	1.00288
10747.8	1.00371	1.00239	1.00402	0.99792
10750.1	1.00199	1.00252	1.00366	0.9926
10751.9	1.0009	1.00188	1.00278	0.98871
10753.8	0.99855	0.99956	1.00113	0.98651
10755.9	0.99811	0.99824	0.9997	0.98569
10757.8	0.99785	0.99643	0.99809	0.98549
10760.1	0.99721	0.99674	0.998	0.98565
10762	0.9961	0.99661	0.99764	0.98466
10763.8	0.99559	0.99431	0.99605	0.98352
10765.9	0.99478	0.99347	0.99478	0.98106
10767.8	0.99352	0.99203	0.99374	0.9798
10770	0.99383	0.99269	0.994	0.97856
10772.1	0.99302	0.9934	0.99424	0.97795
10773.8	0.99332	0.99254	0.99351	0.97856
10775.9	0.9928	0.99169	0.99308	0.98141
10777.8	0.99241	0.99063	0.99276	0.98492
10780	0.99149	0.99211	0.99367	0.98908
10782.2	0.99296	0.99328	0.99446	0.99408
10783.8	0.99284	0.99269	0.99451	0.99813
10785.9	0.9935	0.99279	0.99484	1.00855
10787.8	0.99334	0.99215	0.99461	1.0103
10790	0.99368	0.99251	0.9953	1.01212
10792.2	0.9937	0.99412	0.99665	1.01557
10793.8	0.99438	0.99401	0.99662	1.01738
10795.9	0.99434	0.99418	0.99676	1.01934
10797.8	0.9952	0.9937	0.99666	1.01988
10800	0.99687	0.99457	0.99724	1.02214
10802.2	0.99594	0.99585	0.99794	1.02181
10803.8	0.99662	0.99576	0.99769	1.01888
10805.9	0.99693	0.99597	0.99775	1.01567
10807.8	0.99765	0.99573	0.99737	1.01409
10810	0.99863	0.99645	0.9978	1.01245
10812.3	0.99985	0.99785	0.99883	1.02264
10813.8	0.99926	0.99732	0.99849	1.01176
10815.9	0.99932	0.99755	0.99831	1.00428
10817.8	1.00025	0.99773	0.99837	1.00197
10820	1.00173	0.99901	0.99898	1.00039
10822.3	1.00149	1.00119	1.00004	0.99774
10823.8	1.00288	1.00071	1.00001	0.99997
10825.9	1.00233	1.00068	0.9998	0.99364
10827.8	1.00327	1.00018	0.99966	0.99068
10830	1.00286	1.00102	0.99984	0.98981
10832.4	1.00238	1.00352	1.00086	0.9892
10834.8	1.00278	1.00313	1.00078	0.98874
10837.8	1.00376	1.0039	1.00121	0.99159
10841.1	1.00366	1.00377	1.00179	0.99117
10843.9	1.00457	1.00429	1.00237	0.98926
10846.9	1.00395	1.00412	1.0018	0.9906
10849.9	1.00411	1.00359	1.00174	0.99387
10853.4	1.00363	1.00564	1.00301	0.99446
10855.8	1.0026	1.00468	1.00245	0.99774
10858.8	1.00183	1.00446	1.0025	1.00082
10862.1	1.00243	1.00534	1.00385	0.99985
10864.8	1.00287	1.00563	1.00435	1.00394
10867.9	1.00255	1.00576	1.0045	1.00796
10871.1	1.00257	1.00543	1.00448	1.01156
10874.2	1.0025	1.00674	1.0057	1.01813
10876.9	1.00138	1.00492	1.005	1.01914
10879.8	1.00143	1.00376	1.00459	1.01678
10883.4	1.00122	1.0059	1.00575	1.01534
10885.7	1.00154	1.00479	1.00463	1.01297
10888.9	1.00119	1.00446	1.00421	1.0095
10892.1	1.00034	1.00395	1.0037	1.00548
10895	1.00096	1.00369	1.00349	1.0011
10898	1.00137	1.00198	1.00229	0.99685
10900.8	1.00121	1.00017	1.0013	0.99477
10904.5	1.0009	1.0018	1.00216	0.99342
10906.8	1.00066	1.00023	1.00086	0.99257
10909.8	1.00083	0.99941	1.00021	0.99212
10913	1.00098	0.99933	1.00041	0.99265
10915.9	1.00068	0.99948	0.99998	0.99287
10918.9	1.00046	0.99836	0.99907	0.99311
10921.9	1.00024	0.99686	0.99809	0.99393
10925.4	1.00065	0.99875	0.99898	0.99457
10927.8	0.9996	0.997	0.99775	0.99428
10930.8	0.99976	0.99631	0.99732	0.99367
10934	0.99925	0.99669	0.99762	0.9933
10936.8	0.99889	0.99664	0.99739	0.99325
10939.9	0.99882	0.9962	0.99692	0.99389
10943	0.99954	0.99548	0.99668	0.99511
10946.3	0.99854	0.99732	0.99747	0.99725
10948.8	0.999	0.99611	0.99662	0.99761
10951.8	0.99897	0.99557	0.99666	0.99831
10955.3	0.9979	0.99725	0.99773	0.99951
10957.8	0.99862	0.99723	0.99795	1.00091
10960.9	0.99856	0.99756	0.99815	1.00301
10964.1	0.99943	0.99728	0.99808	1.0052
10967.3	0.99858	0.99899	0.99932	1.00743
10969.9	0.99913	0.9981	0.99896	1.00932
10972.8	0.99876	0.9978	0.99912	1.01068
10976.3	0.99866	1.00005	1.00055	1.0116
10978.8	0.99916	1.00006	1.0003	1.01155
10981.9	0.99899	1.00045	1.00023	1.00968
10986.1	1.00016	1.00032	1.00035	1.00655
10989.9	0.99989	0.99982	1.00011	1.00191
10993.8	0.99993	0.99922	0.99975	0.99772
10998.4	0.99976	1.00161	1.001	0.99235
11002	0.99961	1.00099	1.00011	0.98956
11006.2	1.00097	1.00038	0.99957	0.9878
11010.1	1.00052	1.0016	1.00036	0.98598
11013.8	1.00063	1.00107	1.00014	0.98466
11018	1.00102	1.0015	1.00075	0.98501
11021.9	1.00063	1.00089	1.00027	0.98623
11025.8	1.00123	1.00092	0.99971	0.98873
11030.4	1.00198	1.00326	1.00127	0.99111
11034	1.00115	1.00257	1.00091	0.99342
11038.2	1.00127	1.00228	1.00077	0.99609
11041.9	1.00108	1.00263	1.00117	0.99908
11045.8	1.00107	1.00206	1.00093	1.00162
11050.1	1.00099	1.00336	1.00146	1.00399
11053.8	1.00058	1.00186	1.00064	1.00537
11057.8	1.00049	1.00034	1.00015	1.00679
11062.4	0.99956	1.00249	1.0012	1.00897
11066	0.99999	1.00126	1.0008	1.00783
11070.2	0.99902	1.00065	1.00065	1.00761
11073.9	0.99988	1.00126	1.00047	1.00852
11077.8	0.99941	1.00135	1.00021	1.00804
11082.2	0.99925	1.00251	1.00097	1.00778
11085.8	0.99966	0.99992	0.99967	1.00575
11089.9	0.99946	0.99852	0.999	1.00469
11094.4	0.99883	1.00056	0.99997	1.00319
11098	0.99823	1.00021	0.99961	1.00184
11102.2	0.99953	0.9999	0.99922	1.00035
11105.9	0.99925	1.00045	0.99909	0.99796
11109.8	0.99846	0.99954	0.99872	0.99497
11114.2	0.99921	1.0004	0.99938	0.99393
11117.9	0.9994	0.99873	0.99823	0.99329
11121.8	0.99938	0.99754	0.99767	0.9912
11126.4	1.00017	0.99995	0.9988	0.99106
11130	1.00075	0.99882	0.99831	0.98915
11134.2	1.00071	0.99811	0.99802	0.98902
11138.9	1.00074	0.99804	0.99823	0.98997
11143.9	1.00105	0.99768	0.99768	0.99159
11149.2	1.0004	0.99904	0.99862	0.99424
11153.7	1.00108	0.99898	0.99825	0.99622
11159.3	1.00116	1.00058	0.99958	0.9993
11163.8	1.00171	0.99954	0.99919	1.00108
11169.2	1.00162	1.00067	1.0002	1.0035
11173.9	1.00135	0.99974	1.00007	1.00441
11179.1	1.00216	1.00065	1.00084	1.00578
11184	1.00182	1.00007	1.00067	1.00531
11189	1.00127	1.00036	1.00116	1.00464
11193.9	1.0024	0.9995	1.00097	1.00319
11199.2	1.00243	0.99956	1.0008	1.00237
11203.9	1.00201	0.99947	1.00099	1.00183
11208.9	1.00241	0.99825	1.00047	1.00248
11214.2	1.00228	1.00032	1.00136	1.00245
11218.7	1.00183	0.99933	1.00084	1.00323
11224.3	1.00191	1.00049	1.00214	1.00875
11228.8	1.00238	0.99938	1.00167	1.01123
11234.2	1.00263	1.00047	1.00237	0.99734
11239	1.00256	0.99825	1.00155	0.99557
11244	1.00201	0.99899	1.00183	0.99355
11249	1.00295	0.99852	1.00143	0.99288
11254.2	1.00299	0.99818	1.00132	0.99329
11258.9	1.00291	0.99707	1.00117	0.99503
11263.9	1.00252	0.99562	1.00064	0.99681
11269.1	1.0022	0.99653	1.00149	0.99979
11273.7	1.00401	0.99562	1.00078	1.0023
11279.3	1.00238	0.99749	1.0022	1.00612
11283.8	1.00259	0.99691	1.00222	1.00949
11289.1	1.00328	0.99786	1.00313	1.01468
11294	1.00457	0.99664	1.0028	1.02653
11299	1.00261	0.99668	1.00276	1.02128
11303.9	1.00388	0.99587	1.00224	1.02558
11309.2	1.00248	0.99573	1.00202	1.01521
11313.9	1.00349	0.99548	1.00222	1.01484
11318.8	1.00343	0.99417	1.00147	1.01765
11324.3	1.00322	0.99518	1.00265	1.01475
11328.7	1.00393	0.99529	1.00249	1.02108

## Sheet: Figure 1f
0.5wt%Re/TiO2				5.0 wt% Re/TiO2				12.0 wt% Re/TiO2
B.E.(eV)	Intensity			B.E.(eV)	Intensity			B.E.(eV)	Intensity
53.2983	434.058			53.2983	481.351			53.2983	1310.7
53.1983	432.815			53.1983	481.214			53.1983	1337.42
53.0983	442.254			53.0983	488.857			53.0983	1310.69
52.9983	436.6			52.9983	486.024			52.9983	1337.41
52.8983	436.152			52.8983	485.787			52.8983	1320.96
52.7983	438.245			52.7983	488.391			52.7983	1300.91
52.6983	428.933			52.6983	480.594			52.6983	1324
52.5983	429.147			52.5983	482.307			52.5983	1308.15
52.4983	436.658			52.4983	486.318			52.4983	1289.03
52.3983	440.306			52.3983	489.48			52.3983	1312.51
52.2983	433.689			52.2983	486.382			52.2983	1301.61
52.1983	433.394			52.1983	486.597			52.1983	1314.02
52.0983	429.808			52.0983	486.519			52.0983	1316.32
51.9983	428.785			51.9983	486.001			51.9983	1295.28
51.8983	431.467			51.8983	487.185			51.8983	1322.03
51.7983	419.437			51.7983	478.662			51.7983	1304.82
51.6983	423.367			51.6983	482.079			51.6983	1327.73
51.5983	436.07			51.5983	493.277			51.5983	1298.11
51.4983	439.011			51.4983	493.734			51.4983	1313.36
51.3983	428.166			51.3983	488.412			51.3983	1308.01
51.2983	432.537			51.2983	491.287			51.2983	1342.55
51.1983	431.425			51.1983	491.688			51.1983	1327.84
51.0983	430.954			51.0983	491.728			51.0983	1315.97
50.9983	437.923			50.9983	496.21			50.9983	1348.05
50.8983	433.419			50.8983	494.23			50.8983	1326.07
50.7983	424.651			50.7983	488.978			50.7983	1355.27
50.6983	436.534			50.6983	496.365			50.6983	1339.02
50.5983	441.118			50.5983	498.474			50.5983	1342.24
50.4983	426.739			50.4983	492.627			50.4983	1384.43
50.3983	433.126			50.3983	496.525			50.3983	1347.53
50.2983	428.738			50.2983	494.659			50.2983	1346.94
50.1983	431.602			50.1983	497.038			50.1983	1353.78
50.0983	434.885			50.0983	498.743			50.0983	1386.99
49.9983	434.882			49.9983	499.368			49.9983	1369.39
49.8983	439.799			49.8983	504.815			49.8983	1347.58
49.7983	446.792			49.7983	508.349			49.7983	1354.23
49.6983	446.365			49.6983	506.474			49.6983	1367.97
49.5983	442.255			49.5983	504.919			49.5983	1381.49
49.4983	434.312			49.4983	501.526			49.4983	1350.5
49.3983	433.708			49.3983	501.458			49.3983	1367.65
49.2983	439.481			49.2983	505.771			49.2983	1367.04
49.1983	432.464			49.1983	501.304			49.1983	1363.57
49.0983	432.172			49.0983	501.553			49.0983	1329.12
48.9983	438.531			48.9983	506.455			48.9983	1356.76
48.8983	441.235			48.8983	507.716			48.8983	1339.15
48.7983	442.125			48.7983	510.169			48.7983	1337.18
48.6983	434.82			48.6983	506.433			48.6983	1342.85
48.5983	436.356			48.5983	508.528			48.5983	1344.32
48.4983	430.624			48.4983	505.362			48.4983	1344.46
48.3983	437.695			48.3983	508.993			48.3983	1336.53
48.2983	438.011			48.2983	509.884			48.2983	1347.16
48.1983	437.184			48.1983	509.639			48.1983	1342.22
48.0983	436.163			48.0983	510.202			48.0983	1344.53
47.9983	437.286			47.9983	511.913			47.9983	1346.5
47.8983	436.371			47.8983	512.594			47.8983	1344.87
47.7983	440.241			47.7983	517.064			47.7983	1343.29
47.6983	432.294			47.6983	509.731			47.6983	1352.68
47.5983	445.245			47.5983	513.29			47.5983	1339.17
47.4983	436.035			47.4983	513.719			47.4983	1368.67
47.3983	437.379			47.3983	514.694			47.3983	1338.67
47.2983	442.538			47.2983	517.498			47.2983	1343.09
47.1983	435.196			47.1983	515.82			47.1983	1363.31
47.0983	437.288			47.0983	517.576			47.0983	1364.1
46.9983	434.599			46.9983	516.569			46.9983	1365.02
46.8983	436.984			46.8983	518.647			46.8983	1355.24
46.7983	432.33			46.7983	514.707			46.7983	1363.46
46.6983	435.008			46.6983	518.11			46.6983	1354.14
46.5983	436.603			46.5983	520.458			46.5983	1364.99
46.4983	439.124			46.4983	524.759			46.4983	1371.82
46.3983	433.514			46.3983	519.963			46.3983	1383.87
46.2983	440.935			46.2983	528.225			46.2983	1376.37
46.1983	434.858			46.1983	523.044			46.1983	1381.68
46.0983	434.399			46.0983	523.527			46.0983	1377.29
45.9983	426.109			45.9983	523.251			45.9983	1364.18
45.8983	435.325			45.8983	526.569			45.8983	1363.99
45.7983	444.06			45.7983	531.563			45.7983	1379.33
45.6983	459.472			45.6983	533.448			45.6983	1401.37
45.5983	447.225			45.5983	534.983			45.5983	1401.34
45.4983	445.908			45.4983	553.822			45.4983	1390.33
45.3983	451.325			45.3983	551.925			45.3983	1397.64
45.2983	455.341			45.2983	549.34			45.2983	1396.67
45.1983	448.091			45.1983	556.389			45.1983	1384.72
45.0983	445.027			45.0983	558.702			45.0983	1394.59
44.9983	434.517			44.9983	544.845			44.9983	1395.1
44.8983	441.733			44.8983	570.136			44.8983	1416.46
44.7983	441.724			44.7983	569.766			44.7983	1428.06
44.6983	444.75			44.6983	594.028			44.6983	1425.4
44.5983	431.402			44.5983	611.469			44.5983	1405.02
44.4983	451.496			44.4983	627.708			44.4983	1416.4
44.3983	452.682			44.3983	644.113			44.3983	1423.95
44.2983	468.449			44.2983	685.612			44.2983	1457.65
44.1983	470.228			44.1983	692.952			44.1983	1486.64
44.0983	477.037			44.0983	704.333			44.0983	1518.97
43.9983	484.496			43.9983	724.678			43.9983	1540.14
43.8983	493.644			43.8983	754.491			43.8983	1614.42
43.7983	508.865			43.7983	787.783			43.7983	1638.45
43.6983	514.169			43.6983	798.298			43.6983	1691.08
43.5983	507.504			43.5983	783.649			43.5983	1722.62
43.4983	519.003			43.4983	803.289			43.4983	1757.11
43.3983	511.227			43.3983	768.812			43.3983	1817.55
43.2983	506.343			43.2983	761.878			43.2983	1831.85
43.1983	504.922			43.1983	734.113			43.1983	1847.05
43.0983	498.397			43.0983	709.442			43.0983	1779.5
42.9983	493.795			42.9983	687.643			42.9983	1774.63
42.8983	489.882			42.8983	689.538			42.8983	1766.24
42.7983	470.885			42.7983	640.458			42.7983	1751.38
42.6983	483.833			42.6983	657.773			42.6983	1756.39
42.5983	478.05			42.5983	657.784			42.5983	1681.48
42.4983	473.319			42.4983	648.933			42.4983	1630.89
42.3983	473.387			42.3983	660.537			42.3983	1619.21
42.2983	466.457			42.2983	667.333			42.2983	1565.26
42.1983	459.282			42.1983	653.571			42.1983	1535.36
42.0983	473.13			42.0983	697			42.0983	1510.01
41.9983	475.583			41.9983	717.669			41.9983	1514.4
41.8983	490.206			41.8983	743.463			41.8983	1505.23
41.7983	491.152			41.7983	768.827			41.7983	1555.61
41.6983	498.643			41.6983	797.26			41.6983	1609.14
41.5983	509.829			41.5983	822.336			41.5983	1685.11
41.4983	510.399			41.4983	822.231			41.4983	1678.86
41.3983	520.725			41.3983	843.726			41.3983	1705.09
41.2983	537.735			41.2983	887.223			41.2983	1751.2
41.1983	549.274			41.1983	872.308			41.1983	1793.54
41.0983	547.938			41.0983	909.344			41.0983	1803.57
40.9983	549.488			40.9983	901.681			40.9983	1827.95
40.8983	543.947			40.8983	899.431			40.8983	1830.85
40.7983	536.067			40.7983	882.498			40.7983	1875.73
40.6983	527.933			40.6983	850.909			40.6983	1894.86
40.5983	508.205			40.5983	819.725			40.5983	1912.75
40.4983	512.865			40.4983	786.328			40.4983	1913.6
40.3983	502.599			40.3983	750.463			40.3983	1915.06
40.2983	524.817			40.2983	715.658			40.2983	1869.53
40.1983	480.736			40.1983	661.669			40.1983	1851.97
40.0983	467.46			40.0983	635.62			40.0983	1812.48
39.9983	483.008			39.9983	637.411			39.9983	1753.53
39.8983	456.378			39.8983	596.057			39.8983	1714.39
39.7983	470.584			39.7983	612.045			39.7983	1647.42
39.6983	461.641			39.6983	596.194			39.6983	1592.33
39.5983	459.577			39.5983	589.313			39.5983	1545.33
39.4983	440.411			39.4983	582.942			39.4983	1471.99
39.3983	436.175			39.3983	552.385			39.3983	1464.12
39.2983	448.873			39.2983	549.38			39.2983	1410.24
39.1983	438.575			39.1983	562.995			39.1983	1376.81
39.0983	425.394			39.0983	570.434			39.0983	1396.59
38.9983	437.955			38.9983	612.091			38.9983	1414.56
38.8983	471.657			38.8983	639.85			38.8983	1455.6
38.7983	447.312			38.7983	660.796			38.7983	1498.2
38.6983	475.374			38.6983	703.899			38.6983	1519.41
38.5983	456.32			38.5983	752.731			38.5983	1587.96
38.4983	470.555			38.4983	790.549			38.4983	1636.29
38.4483	485			38.3983	817.544			38.3983	1678.89
38.3983	508.341			38.2983	852.178			38.2983	1751.28
