# Supplementary material for: Size-dependent active site and its catalytic mechanism for CO2 hydrogenation reactivity and selectivity over Re/TiO2
Source: Research Square preprint supplement (doi:10.21203/rs.3.rs-2614327/v1), 2023-03-02
Supplement: Supplementary file 3 [file f93e938bcd08425077353a22.xlsx]

## Sheet: 3a
wavenumber	0.5wt%Re/TiO2	12.0wt%Re/TiO2
3200.92	0.0267	0.07359
3199.49	0.0267	0.07359
3198.06	0.0267	0.07355
3196.64	0.0267	0.07343
3195.21	0.0267	0.07319
3193.78	0.0267	0.07283
3192.36	0.0267	0.07247
3190.93	0.0267	0.07219
3189.5	0.0267	0.07195
3188.07	0.0267	0.07163
3186.65	0.0267	0.07119
3185.22	0.0272	0.07071
3183.79	0.0272	0.07027
3182.37	0.0272	0.06991
3180.94	0.0272	0.06983
3179.51	0.0267	0.07007
3178.09	0.0267	0.07063
3176.66	0.0262	0.07123
3175.23	0.0262	0.07167
3173.8	0.0262	0.07199
3172.38	0.0262	0.07223
3170.95	0.0257	0.07243
3169.52	0.0257	0.07267
3168.1	0.0257	0.07291
3166.67	0.0257	0.07319
3165.24	0.0252	0.07339
3163.81	0.0252	0.07355
3162.39	0.0247	0.07363
3160.96	0.0247	0.07351
3159.53	0.0247	0.07343
3158.11	0.0252	0.07351
3156.68	0.0252	0.07375
3155.25	0.0252	0.07399
3153.83	0.0252	0.07399
3152.4	0.0252	0.07379
3150.97	0.0247	0.07355
3149.54	0.0247	0.07339
3148.12	0.0242	0.07323
3146.69	0.0237	0.07311
3145.26	0.0237	0.07303
3143.84	0.0237	0.07299
3142.41	0.0237	0.07299
3140.98	0.0237	0.07299
3139.55	0.0242	0.07295
3138.13	0.0242	0.07283
3136.7	0.0242	0.07267
3135.27	0.0242	0.07239
3133.85	0.0242	0.07215
3132.42	0.0237	0.07199
3130.99	0.0237	0.07199
3129.57	0.0237	0.07219
3128.14	0.0237	0.07231
3126.71	0.0237	0.07223
3125.28	0.0237	0.07191
3123.86	0.0237	0.07163
3122.43	0.0237	0.07175
3121	0.0237	0.07231
3119.58	0.0237	0.07315
3118.15	0.0237	0.07395
3116.72	0.0232	0.07459
3115.29	0.0232	0.07503
3113.87	0.0227	0.07539
3112.44	0.0222	0.07587
3111.01	0.0217	0.07643
3109.59	0.0212	0.07687
3108.16	0.0212	0.07683
3106.73	0.0212	0.07635
3105.3	0.0212	0.07551
3103.88	0.0212	0.07471
3102.45	0.0212	0.07419
3101.02	0.0207	0.07407
3099.6	0.0207	0.07423
3098.17	0.0202	0.07443
3096.74	0.0197	0.07459
3095.32	0.0192	0.07491
3093.89	0.0187	0.07563
3092.46	0.0187	0.07667
3091.03	0.0182	0.07763
3089.61	0.0177	0.07815
3088.18	0.0177	0.07799
3086.75	0.0177	0.07727
3085.33	0.0177	0.07647
3083.9	0.0177	0.07595
3082.47	0.0172	0.07579
3081.04	0.0172	0.07575
3079.62	0.0167	0.07567
3078.19	0.0167	0.07543
3076.76	0.0162	0.07539
3075.34	0.0157	0.07583
3073.91	0.0152	0.07675
3072.48	0.0147	0.07803
3071.06	0.0147	0.07919
3069.63	0.0142	0.07987
3068.2	0.0142	0.08007
3066.77	0.0142	0.08003
3065.35	0.0142	0.08003
3063.92	0.0142	0.08015
3062.49	0.0142	0.08035
3061.07	0.0142	0.08035
3059.64	0.0142	0.07999
3058.21	0.0142	0.07939
3056.78	0.0142	0.07883
3055.36	0.0137	0.07851
3053.93	0.0137	0.07847
3052.5	0.0137	0.07851
3051.08	0.0137	0.07827
3049.65	0.0137	0.07775
3048.22	0.0137	0.07707
3046.8	0.0137	0.07655
3045.37	0.0132	0.07643
3043.94	0.0132	0.07663
3042.51	0.0132	0.07699
3041.09	0.0132	0.07719
3039.66	0.0127	0.07723
3038.23	0.0127	0.07711
3036.81	0.0127	0.07707
3035.38	0.0127	0.07719
3033.95	0.0132	0.07727
3032.52	0.0132	0.07707
3031.1	0.0132	0.07635
3029.67	0.0132	0.07531
3028.24	0.0132	0.07467
3026.82	0.0127	0.07543
3025.39	0.0127	0.07799
3023.96	0.0122	0.08203
3022.53	0.0112	0.08667
3021.11	0.0107	0.09111
3019.68	0.0102	0.09483
3018.25	0.0102	0.09755
3016.83	0.0102	0.09923
3015.4	0.0102	0.09991
3013.97	0.0107	0.09951
3012.55	0.0107	0.09791
3011.12	0.0112	0.09495
3009.69	0.0117	0.09079
3008.26	0.0117	0.08587
3006.84	0.0117	0.08107
3005.41	0.0117	0.07751
3003.98	0.0117	0.07567
3002.56	0.0117	0.07527
3001.13	0.0112	0.07563
2999.7	0.0112	0.07627
2998.27	0.0112	0.07707
2996.85	0.0112	0.07795
2995.42	0.0107	0.07883
2993.99	0.0107	0.07959
2992.57	0.0107	0.08015
2991.14	0.0107	0.08051
2989.71	0.0112	0.08083
2988.29	0.0112	0.08111
2986.86	0.0112	0.08139
2985.43	0.0112	0.08163
2984	0.0107	0.08179
2982.58	0.0107	0.08183
2981.15	0.0107	0.08183
2979.72	0.0107	0.08195
2978.3	0.0107	0.08223
2976.87	0.0112	0.08267
2975.44	0.0117	0.08327
2974.01	0.0122	0.08375
2972.59	0.0127	0.08403
2971.16	0.0137	0.08407
2969.73	0.0142	0.08407
2968.31	0.0147	0.08435
2966.88	0.0147	0.08507
2965.45	0.0152	0.08611
2964.02	0.0152	0.08715
2962.6	0.0152	0.08799
2961.17	0.0152	0.08851
2959.74	0.0152	0.08879
2958.32	0.0152	0.08891
2956.89	0.0157	0.08907
2955.46	0.0157	0.08919
2954.04	0.0157	0.08919
2952.61	0.0152	0.08887
2951.18	0.0152	0.08827
2949.75	0.0147	0.08739
2948.33	0.0142	0.08651
2946.9	0.0137	0.08595
2945.47	0.0127	0.08575
2944.05	0.0122	0.08579
2942.62	0.0112	0.08575
2941.19	0.0107	0.08539
2939.76	0.0102	0.08479
2938.34	0.0097	0.08411
2936.91	0.0092	0.08367
2935.48	0.0087	0.08359
2934.06	0.0087	0.08371
2932.63	0.0082	0.08379
2931.2	0.0082	0.08367
2929.78	0.0082	0.08327
2928.35	0.0082	0.08271
2926.92	0.0077	0.08219
2925.49	0.0077	0.08191
2924.07	0.0072	0.08195
2922.64	0.0072	0.08219
2921.21	0.0072	0.08227
2919.79	0.0072	0.08215
2918.36	0.0072	0.08179
2916.93	0.0072	0.08143
2915.5	0.0072	0.08131
2914.08	0.0072	0.08147
2912.65	0.0072	0.08163
2911.22	0.0072	0.08155
2909.8	0.0072	0.08123
2908.37	0.0077	0.08067
2906.94	0.0077	0.07999
2905.52	0.0082	0.07939
2904.09	0.0087	0.07915
2902.66	0.0087	0.07931
2901.23	0.0092	0.07979
2899.81	0.0097	0.08031
2898.38	0.0102	0.08067
2896.95	0.0102	0.08087
2895.53	0.0112	0.08103
2894.1	0.0117	0.08131
2892.67	0.0122	0.08167
2891.24	0.0132	0.08191
2889.82	0.0137	0.08199
2888.39	0.0142	0.08183
2886.96	0.0147	0.08155
2885.54	0.0152	0.08123
2884.11	0.0152	0.08103
2882.68	0.0152	0.08099
2881.25	0.0147	0.08103
2879.83	0.0142	0.08119
2878.4	0.0137	0.08123
2876.97	0.0132	0.08119
2875.55	0.0127	0.08111
2874.12	0.0122	0.08111
2872.69	0.0117	0.08119
2871.27	0.0112	0.08131
2869.84	0.0107	0.08143
2868.41	0.0102	0.08143
2866.98	0.0092	0.08131
2865.56	0.0087	0.08115
2864.13	0.0082	0.08087
2862.7	0.0077	0.08059
2861.28	0.0072	0.08027
2859.85	0.0072	0.07991
2858.42	0.0067	0.07947
2856.99	0.0062	0.07899
2855.57	0.0062	0.07847
2854.14	0.0057	0.07803
2852.71	0.0052	0.07771
2851.29	0.0047	0.07739
2849.86	0.0047	0.07711
2848.43	0.0042	0.07687
2847.01	0.0042	0.07675
2845.58	0.0042	0.07671
2844.15	0.0042	0.07675
2842.72	0.0042	0.07675
2841.3	0.0042	0.07671
2839.87	0.0042	0.07675
2838.44	0.0042	0.07691
2837.02	0.0042	0.07707
2835.59	0.0037	0.07719
2834.16	0.0037	0.07723
2832.73	0.0037	0.07719
2831.31	0.0032	0.07711
2829.88	0.0032	0.07691
2828.45	0.0032	0.07667
2827.03	0.0032	0.07631
2825.6	0.0032	0.07595
2824.17	0.0032	0.07567
2822.74	0.0027	0.07547
2821.32	0.0027	0.07531
2819.89	0.0027	0.07519
2818.46	0.0022	0.07507
2817.04	0.0022	0.07499
2815.61	0.0022	0.07491
2814.18	0.0017	0.07483
2812.76	0.0017	0.07471
2811.33	0.0017	0.07455
2809.9	0.0017	0.07435
2808.47	0.0012	0.07419
2807.05	0.0012	0.07395
2805.62	0.0012	0.07371
2804.19	0.0012	0.07343
2802.77	0.0012	0.07331
2801.34	0.0012	0.07335
2799.91	0.00035	0.07338
2798.48	0.00035	0.07344
2797.06	0.00035	0.07348
2795.63	0.00035	0.07351
2794.2	0.00035	0.07351
2792.78	0.00035	0.07352
2791.35	0.00035	0.07351
2789.92	0.00035	0.07348
2788.5	0.0003	0.07342
2787.07	0.0003	0.07335
2785.64	0.0003	0.07327
2784.21	0.0003	0.0732
2782.79	0.0003	0.07313
2781.36	0.00025	0.07308
2779.93	0.00025	0.07305
2778.51	0.00025	0.07303
2777.08	0.00025	0.07303
2775.65	0.00025	0.07304
2774.22	0.00025	0.07307
2772.8	0.00025	0.07309
2771.37	0.00025	0.0731
2769.94	0.00025	0.07309
2768.52	0.00025	0.07307
2767.09	0.00025	0.07304
2765.66	0.00025	0.07301
2764.24	0.00025	0.07297
2762.81	0.00025	0.07293
2761.38	0.0002	0.07289
2759.95	0.0002	0.07284
2758.53	0.0002	0.07278
2757.1	0.0002	0.07272
2755.67	0.0002	0.07266
2754.25	0.0002	0.07264
2752.82	0.0002	0.07266
2751.39	0.0002	0.0727
2749.96	0.0002	0.07274
2748.54	0.0002	0.07276
2747.11	0.0002	0.07276
2745.68	0.0002	0.07274
2744.26	0.0002	0.07269
2742.83	0.0002	0.07261
2741.4	0.0002	0.07252
2739.97	0.0002	0.07242
2738.55	0.0002	0.07234
2737.12	0.0002	0.07228
2735.69	0.0002	0.07225
2734.27	0.00015	0.07226
2732.84	0.00015	0.0723
2731.41	0.00015	0.07237
2729.99	0.00015	0.07246
2728.56	0.00015	0.07255
2727.13	0.00015	0.07262
2725.7	0.00015	0.07265
2724.28	0.00015	0.07264
2722.85	0.00015	0.07259
2721.42	0.00015	0.07253
2720	0.00015	0.07245
2718.57	0.00015	0.07238
2717.14	0.0001	0.07231
2715.71	0.0001	0.07225
2714.29	0.0001	0.07222
2712.86	0.0001	0.07222
2711.43	0.0001	0.07223
2710.01	0.0001	0.07225
2708.58	0.0001	0.07225
2707.15	0.0001	0.07225
2705.73	5e-05	0.07222
2704.3	5e-05	0.07216
2702.87	0.0001	0.07206
2701.44	0.0001	0.07193
2700.02	0.0001	0.0718
2200.54	5e-05	0.07691
2199.12	5e-05	0.07757
2197.69	5e-05	0.0782
2196.26	5e-05	0.07881
2194.83	5e-05	0.07942
2193.41	5e-05	0.08
2191.98	5e-05	0.08058
2190.55	5e-05	0.08114
2189.13	5e-05	0.08169
2187.7	5e-05	0.08221
2186.27	5e-05	0.08271
2184.84	5e-05	0.08318
2183.42	5e-05	0.08361
2181.99	5e-05	0.084
2180.56	5e-05	0.08434
2179.14	5e-05	0.08462
2177.71	5e-05	0.08484
2176.28	5e-05	0.085
2174.86	5e-05	0.08509
2173.43	5e-05	0.08513
2172	5e-05	0.0851
2170.57	5e-05	0.08501
2169.15	5e-05	0.08485
2167.72	5e-05	0.08461
2166.29	5e-05	0.0843
2164.87	5e-05	0.08391
2163.44	5e-05	0.08344
2162.01	5e-05	0.08288
2160.58	5e-05	0.08224
2159.16	5e-05	0.08148
2157.73	5e-05	0.08062
2156.3	5e-05	0.07965
2154.88	5e-05	0.07852
2153.45	5e-05	0.07716
2152.02	5e-05	0.07559
2150.59	5e-05	0.07389
2149.17	5e-05	0.07221
2147.74	0.0001	0.07069
2146.31	0.0001	0.06943
2144.89	0.0001	0.06852
2143.46	0.0001	0.06801
2142.03	0.0001	0.06794
2140.61	0.0001	0.06831
2139.18	0.0001	0.0691
2137.75	0.0001	0.07023
2136.32	0.0001	0.07161
2134.9	0.0001	0.07314
2133.47	0.00015	0.07469
2132.04	0.00015	0.07612
2130.62	0.00025	0.07732
2129.19	0.00035	0.07828
2127.76	0.0006	0.07909
2126.33	0.0011	0.07982
2124.91	0.0021	0.08051
2123.48	0.004	0.08123
2122.05	0.00725	0.08202
2120.63	0.0124	0.08287
2119.2	0.01955	0.08381
2117.77	0.028	0.08484
2116.35	0.03635	0.08594
2114.92	0.04275	0.08705
2113.49	0.0458	0.08811
2112.06	0.045	0.08903
2110.64	0.0408	0.08972
2109.21	0.0344	0.09013
2107.78	0.02715	0.09019
2106.36	0.02015	0.0899
2104.93	0.01425	0.0893
2103.5	0.0097	0.08846
2102.07	0.0064	0.08746
2100.65	0.0041	0.08639
2099.22	0.00265	0.08527
2097.79	0.0017	0.08416
2096.37	0.0011	0.08313
2094.94	0.00075	0.08223
2093.51	0.00055	0.08149
2092.09	0.0004	0.08087
2090.66	0.0003	0.08035
2089.23	0.00025	0.07995
2087.8	0.0002	0.07979
2086.38	0.0002	0.07993
2084.95	0.00015	0.0803
2083.52	0.00015	0.08076
2082.1	0.00015	0.08123
2080.67	0.00015	0.0817
2079.24	0.00015	0.08217
2077.81	0.00015	0.08262
2076.39	0.00015	0.08305
2074.96	0.0001	0.08345
2073.53	0.0001	0.08383
2072.11	0.0001	0.08424
2070.68	0.00015	0.08473
2069.25	0.00015	0.08537
2067.82	0.00015	0.08627
2066.4	0.00015	0.08762
2064.97	0.00015	0.08955
2063.54	0.00015	0.09208
2062.12	0.00015	0.09511
2060.69	0.00015	0.09862
2059.26	0.00015	0.1027
2057.84	0.00015	0.10745
2056.41	0.0001	0.11294
2054.98	0.0001	0.11918
2053.55	0.0001	0.12611
2052.13	0.0001	0.13363
2050.7	0.0001	0.14166
2049.27	0.0001	0.15011
2047.85	0.0001	0.15884
2046.42	0.0001	0.16772
2044.99	0.0001	0.17661
2043.56	0.0001	0.18535
2042.14	0.0001	0.19383
2040.71	0.0001	0.20193
2039.28	0.0001	0.20952
2037.86	0.0001	0.21653
2036.43	0.0001	0.22286
2035	0.0001	0.22839
2033.58	0.0001	0.23297
2032.15	0.0001	0.23651
2030.72	0.0001	0.23892
2029.29	0.0001	0.24012
2027.87	0.0001	0.24012
2026.44	0.0001	0.23891
2025.01	0.0001	0.23657
2023.59	0.0001	0.23327
2022.16	0.0001	0.22924
2020.73	0.0001	0.2247
2019.3	0.0001	0.21985
2017.88	0.0001	0.21486
2016.45	0.0001	0.20989
2015.02	0.0001	0.20507
2013.6	0.0001	0.20048
2012.17	0.0001	0.19614
2010.74	0.0001	0.19205
2009.31	0.0001	0.18823
2007.89	0.0001	0.18467
2006.46	0.0001	0.18137
2005.03	0.0001	0.1783
2003.61	0.0001	0.17541
2002.18	0.0001	0.17268
2000.75	0.0001	0.1701
1999.33	0.00025	0.16771
1997.9	0.00025	0.16552
1996.47	0.00025	0.16355
1995.04	0.00025	0.16181
1993.62	0.00025	0.16032
1992.19	0.00025	0.15911
1990.76	0.0005	0.15817
1989.34	0.0005	0.15747
1987.91	0.0005	0.15699
1986.48	0.00025	0.15674
1985.05	0.00025	0.15675
1983.63	0.00025	0.15704
1982.2	0.00025	0.15758
1980.77	0.00025	0.1583
1979.35	0.00025	0.15906
1977.92	0.00025	0.15974
1976.49	0.00025	0.16031
1975.07	0.00025	0.16077
1973.64	0.00025	0.16117
1972.21	0.00025	0.16156
1970.78	0.00025	0.16196
1969.36	0.00025	0.16238
1967.93	0.00025	0.16283
1966.5	0.00025	0.16332
1965.08	0.00025	0.16387
1963.65	0.00025	0.16449
1962.22	0.00025	0.16523
1960.79	0.00025	0.1661
1959.37	0.00025	0.16703
1957.94	0.00025	0.16791
1956.51	0.00025	0.16859
1955.09	0.00025	0.16896
1953.66	0.00025	0.16895
1952.23	0.00025	0.16856
1950.81	0.00025	0.16789
1949.38	0.00025	0.16707
1947.95	0.00025	0.16626
1946.52	0.00025	0.16553
1945.1	0.00025	0.16495
1943.67	0.00025	0.16456
1942.24	0.00025	0.16441
1940.82	0.00025	0.1645
1939.39	0.00025	0.16485
1937.96	0.00025	0.16543
1936.53	0.00025	0.16616
1935.11	0.00025	0.16694
1933.68	0.00025	0.16758
1932.25	0.00025	0.16789
1930.83	0.00025	0.16775
1929.4	0.00025	0.16718
1927.97	0.00025	0.16624
1926.54	0.00025	0.16504
1925.12	0.0005	0.16372
1923.69	0.0005	0.16238
1922.26	0.0005	0.16105
1920.84	0.00075	0.15973
1919.41	0.00075	0.15838
1917.98	0.00075	0.15698
1916.56	0.00075	0.15563
1915.13	0.001	0.15439
1913.7	0.001	0.15327
1912.27	0.001	0.15218
1910.85	0.001	0.15102
1909.42	0.001	0.14978
1907.99	0.001	0.14848
1906.57	0.001	0.14712
1905.14	0.00075	0.14566
1903.71	0.00075	0.14412
1902.28	0.00075	0.1426
1900.86	0.00075	0.14111
1899.43	0.00075	0.13954
1898	0.0005	0.13779
1896.58	0.0005	0.13591
1895.15	0.0005	0.13399
1893.72	0.0005	0.13215
1892.3	0.0005	0.13045
1890.87	0.0005	0.1289
1889.44	0.0005	0.12751
1888.01	0.0005	0.12631
1886.59	0.0005	0.12532
1885.16	0.0005	0.12453
1883.73	0.0005	0.12388
1882.31	0.0005	0.12335
1880.88	0.0005	0.12287
1879.45	0.0005	0.12223
1878.02	0.0005	0.12118
1876.6	0.0005	0.1197
1875.17	0.00025	0.11799
1873.74	0.0005	0.11627
1872.32	0.0005	0.11466
1870.89	0.0005	0.11316
1869.46	0.0005	0.11177
1868.03	0.0005	0.11047
1866.61	0.0005	0.10928
1865.18	0.0005	0.1082
1863.75	0.0005	0.10724
1862.33	0.0005	0.10642
1860.9	0.00025	0.10571
1859.47	0.00025	0.10503
1858.05	0.0005	0.10417
1856.62	0.0005	0.10292
1855.19	0.0005	0.10117
1853.76	0.0005	0.09902
1852.34	0.0005	0.0967
1850.91	0.0005	0.09442
1849.48	0.0005	0.0923
1848.06	0.0005	0.09034
1846.63	0.0005	0.08855
1845.2	0.0005	0.08692
1843.77	0.0005	0.08554
1842.35	0.0005	0.08443
1840.92	0.0005	0.08354
1839.49	0.0005	0.08274
1838.07	0.0005	0.08197
1836.64	0.0005	0.08122
1835.21	0.0005	0.08047
1833.79	0.0005	0.07965
1832.36	0.0005	0.07872
1830.93	0.0005	0.07776
1829.5	0.0005	0.07692
1828.08	0.0005	0.07631
1826.65	0.0005	0.07595
1825.22	0.0005	0.07578
1823.8	0.0005	0.07578
1822.37	0.0005	0.0759
1820.94	0.0005	0.07605
1819.51	0.0005	0.0761
1818.09	0.0005	0.07595
1816.66	0.0005	0.07557
1815.23	0.0005	0.07507
1813.81	0.0005	0.07454
1812.38	0.0005	0.07395
1810.95	0.00075	0.07327
1809.53	0.00075	0.07251
1808.1	0.00075	0.07173
1806.67	0.00075	0.07099
1805.24	0.00075	0.07032
1803.82	0.00075	0.06968
1802.39	0.00075	0.06894
1800.96	0.00075	0.06803
1799.54	0.00075	0.067
1798.11	0.00075	0.06597
1796.68	0.00075	0.06505
1795.25	0.00075	0.06435
1793.83	0.00075	0.06388
1792.4	0.00075	0.06361
1790.97	0.00075	0.06347
1789.55	0.00075	0.06336
1788.12	0.00075	0.06325
1786.69	0.00075	0.06321
1785.26	0.00075	0.06327
1783.84	0.00075	0.06334
1782.41	0.001	0.06318
1780.98	0.001	0.0626
1779.56	0.001	0.0616
1778.13	0.001	0.0604
1776.7	0.001	0.05929
1775.28	0.001	0.05845
1773.85	0.001	0.0579
1772.42	0.001	0.05753
1770.99	0.001	0.05726
1769.57	0.001	0.05707
1768.14	0.001	0.05696
1766.71	0.001	0.05697
1765.29	0.00125	0.05714
1763.86	0.00125	0.0575
1762.43	0.00125	0.05794
1761	0.00125	0.0582
1759.58	0.00125	0.05801
1758.15	0.00125	0.05736
1756.72	0.00125	0.05646
1755.3	0.00125	0.05553
1753.87	0.00125	0.0547
1752.44	0.0015	0.05401
1751.02	0.0015	0.05341
1749.59	0.0015	0.05286
1748.16	0.0015	0.05238
1746.73	0.00175	0.05209
1745.31	0.00175	0.05197
1743.88	0.00175	0.05187
1742.45	0.00175	0.0517
1741.03	0.00175	0.05151
1739.6	0.00175	0.05135
1738.17	0.00175	0.05116
1736.74	0.00175	0.05096
1735.32	0.00175	0.05085
1733.89	0.00175	0.05094
1732.46	0.002	0.05125
1731.04	0.002	0.05178
1729.61	0.00225	0.0525
1728.18	0.00225	0.05321
1726.76	0.00225	0.0536
1725.33	0.00225	0.05356
1723.9	0.00225	0.05321
1722.47	0.00225	0.05262
1721.05	0.0025	0.05181
1719.62	0.0025	0.05094
1718.19	0.0025	0.05021
1716.77	0.00275	0.04969
1715.34	0.003	0.04937
1713.91	0.003	0.04924
1712.48	0.003	0.04933
1711.06	0.003	0.0496
1709.63	0.003	0.04993
1708.2	0.003	0.05014
1706.78	0.003	0.05002
1705.35	0.00325	0.04941
1703.92	0.003	0.04841
1702.49	0.003	0.04738
1701.07	0.003	0.04668
1699.64	0.003	0.04641
1698.21	0.00325	0.04657
1696.79	0.00325	0.04708
1695.36	0.00325	0.04771
1693.93	0.00325	0.04812
1692.51	0.00325	0.0482
1691.08	0.0035	0.04814
1689.65	0.0035	0.0481
1688.22	0.0035	0.04812
1686.8	0.00375	0.04808
1685.37	0.00375	0.0479
1683.94	0.004	0.04764
1682.52	0.004	0.04748
1681.09	0.004	0.04752
1679.66	0.004	0.04768
1678.23	0.004	0.04792
1676.81	0.004	0.04829
1675.38	0.004	0.0488
1673.95	0.004	0.04936
1672.53	0.004	0.0497
1671.1	0.00425	0.0497
1669.67	0.00425	0.04961
1668.25	0.00425	0.04974
1666.82	0.00425	0.05019
1665.39	0.00425	0.0509
1663.96	0.0045	0.05153
1662.54	0.0045	0.05176
1661.11	0.00475	0.05168
1659.68	0.00475	0.05143
1658.26	0.00475	0.05095
1656.83	0.00475	0.05007
1655.4	0.005	0.04896
1653.97	0.00525	0.04799
1652.55	0.0055	0.04735
1651.12	0.00575	0.04707
1649.69	0.006	0.04712
1648.27	0.006	0.04751
1646.84	0.00625	0.04814
1645.41	0.0065	0.04881
1643.98	0.00675	0.04947
1642.56	0.007	0.05011
1641.13	0.007	0.05059
1639.7	0.0075	0.05094
1638.28	0.00775	0.05133
1636.85	0.00825	0.0517
1635.42	0.0085	0.05184
1634	0.00875	0.05165
1632.57	0.009	0.05126
1631.14	0.00925	0.05093
1629.71	0.0095	0.05076
1628.29	0.01	0.05069
1626.86	0.0105	0.05052
1625.43	0.01125	0.05004
1624.01	0.01175	0.04922
1622.58	0.01225	0.04822
1621.15	0.01275	0.04737
1619.72	0.013	0.04682
1618.3	0.01325	0.04655
1616.87	0.0135	0.0465
1615.44	0.0135	0.04662
1614.02	0.0135	0.04691
1612.59	0.01325	0.04731
1611.16	0.01325	0.04778
1609.74	0.01325	0.04835
1608.31	0.013	0.04907
1606.88	0.0125	0.04991
1605.45	0.01225	0.05072
1604.03	0.012	0.05136
1602.6	0.01175	0.05186
1601.17	0.01175	0.05237
1599.75	0.0115	0.0529
1598.32	0.01125	0.05345
1596.89	0.011	0.05397
1595.46	0.011	0.05446
1594.04	0.011	0.05495
1592.61	0.011	0.05547
1591.18	0.011	0.05602
1589.76	0.011	0.05662
1588.33	0.011	0.05723
1586.9	0.01125	0.05772
1585.48	0.0115	0.05799
1584.05	0.012	0.05815
1582.62	0.01225	0.05829
1581.19	0.01275	0.05845
1579.77	0.013	0.05855
1578.34	0.0135	0.05857
1576.91	0.01425	0.05863
1575.49	0.015	0.05884
1574.06	0.01575	0.05928
1572.63	0.01625	0.06
1571.2	0.01675	0.061
1569.78	0.0175	0.06204
1568.35	0.01825	0.06264
1566.92	0.019	0.06275
1565.5	0.01975	0.06249
1564.07	0.02025	0.06202
1562.64	0.02075	0.06154
1561.21	0.02125	0.06132
1559.79	0.02175	0.06139
1558.36	0.023	0.06173
1556.93	0.02425	0.06232
1555.51	0.02475	0.06324
1554.08	0.025	0.06445
1552.65	0.02525	0.06573
1551.23	0.0255	0.06663
1549.8	0.026	0.0669
1548.37	0.02625	0.0667
1546.94	0.02675	0.06607
1545.52	0.02725	0.06503
1544.09	0.028	0.06394
1542.66	0.0285	0.063
1541.24	0.029	0.06236
1539.81	0.02925	0.06218
1538.38	0.029	0.0625
1536.95	0.029	0.06324
1535.53	0.02875	0.06429
1534.1	0.0285	0.0655
1532.67	0.0285	0.06655
1531.25	0.02875	0.06699
1529.82	0.02875	0.06654
1528.39	0.02875	0.06517
1526.97	0.02875	0.06323
1525.54	0.0285	0.06129
1524.11	0.0285	0.05962
1522.68	0.02825	0.0583
1521.26	0.0275	0.05729
1519.83	0.02675	0.05661
1518.4	0.026	0.05613
1516.98	0.0255	0.05551
1515.55	0.02475	0.05471
1514.12	0.02375	0.05393
1512.69	0.02275	0.05331
1511.27	0.02225	0.0529
1509.84	0.022	0.0526
1508.41	0.02175	0.05225
1506.99	0.0205	0.0518
1505.56	0.0185	0.05133
1504.13	0.01725	0.05099
1502.7	0.0165	0.05098
1501.28	0.016	0.05136
1499.85	0.01525	0.05192
1498.42	0.0145	0.05231
1497	0.01375	0.05235
1495.57	0.01275	0.05191
1494.14	0.01225	0.05105
1492.72	0.01175	0.05026
1491.29	0.0115	0.04985
1489.86	0.01125	0.04983
1488.43	0.01075	0.05012
1487.01	0.01	0.0506
1485.58	0.0095	0.05102
1484.15	0.00925	0.05117
1482.73	0.009	0.05099
1481.3	0.00875	0.05065
1479.87	0.0085	0.05031
1478.44	0.00825	0.04997
1477.02	0.008	0.04949
1475.59	0.008	0.04886
1474.16	0.00775	0.04827
1472.74	0.00775	0.04792
1471.31	0.0075	0.04795
1469.88	0.0075	0.04833
1468.46	0.0075	0.04884
1467.03	0.0075	0.04914
1465.6	0.0075	0.04922
1464.17	0.00775	0.0492
1462.75	0.008	0.04911
1461.32	0.008	0.04891
1459.89	0.00825	0.04865
1458.47	0.0085	0.04853
1457.04	0.00875	0.0487
1455.61	0.0095	0.0492
1454.18	0.00975	0.05001
1452.76	0.01025	0.0511
1451.33	0.01075	0.05249
1449.9	0.0115	0.05422
1448.48	0.012	0.05617
1447.05	0.013	0.05797
1445.62	0.014	0.05925
1444.2	0.01475	0.05994
1442.77	0.01575	0.06037
1441.34	0.01675	0.0608
1439.91	0.01775	0.06121
1438.49	0.01875	0.06156
1437.06	0.01975	0.06182
1435.63	0.02125	0.06196
1434.21	0.02225	0.06199
1432.78	0.023	0.06193
1431.35	0.0235	0.06186
1429.92	0.02375	0.06171
1428.5	0.02375	0.06135
1427.07	0.02375	0.06071
1425.64	0.0235	0.05983
1424.22	0.023	0.05877
1422.79	0.0225	0.05765
1421.36	0.022	0.05664
1419.93	0.02175	0.05579
1418.51	0.02125	0.05509
1417.08	0.02075	0.05454
1415.65	0.02	0.05414
1414.23	0.0195	0.05388
1412.8	0.01925	0.05376
1411.37	0.019	0.05373
1409.95	0.019	0.05375
1408.52	0.019	0.05369
1407.09	0.019	0.05335
1405.66	0.01925	0.05265
1404.24	0.0195	0.05171
1402.81	0.01975	0.05076
1401.38	0.02	0.04997
1399.96	0.0205	0.04941
1398.53	0.0205	0.04902
1397.1	0.0205	0.04873
1395.67	0.02025	0.04852
1394.25	0.02	0.0484
1392.82	0.01975	0.04842
1391.39	0.0195	0.04859
1389.97	0.01925	0.04896
1388.54	0.019	0.0495
1387.11	0.01875	0.05008
1385.69	0.0185	0.05055
1384.26	0.01825	0.05076
1382.83	0.01775	0.05071
1381.4	0.01725	0.05051
1379.98	0.01675	0.0503
1378.55	0.0165	0.05013
1377.12	0.01625	0.04995
1375.7	0.016	0.04969
1374.27	0.0155	0.04929
1372.84	0.015	0.04876
1371.41	0.0145	0.04816
1369.99	0.01425	0.04763
1368.56	0.014	0.04729
1367.13	0.01375	0.04718
1365.71	0.01325	0.04724
1364.28	0.013	0.0474
1362.85	0.01275	0.04752
1361.43	0.013	0.04758
1360	0.013	0.04761
1358.57	0.013	0.04767
1357.14	0.01325	0.04777
1355.72	0.01325	0.04792
1354.29	0.01325	0.04809
1352.86	0.01325	0.04826
1351.44	0.01325	0.04828
1350.01	0.01325	0.04802
1348.58	0.01325	0.04746
1347.15	0.013	0.04668
1345.73	0.01275	0.04576
1344.3	0.01275	0.04472
1342.87	0.0125	0.04354
1341.45	0.01225	0.04223
1340.02	0.01175	0.0408
1338.59	0.01125	0.03929
1337.16	0.01075	0.03775
1335.74	0.01025	0.03627
1334.31	0.00975	0.03489
1332.88	0.0095	0.03366
1331.46	0.009	0.0326
1330.03	0.00875	0.03164
1328.6	0.00825	0.0307
1327.18	0.00775	0.02968
1325.75	0.0075	0.02859
1324.32	0.00725	0.0275
1322.89	0.00725	0.02647
1321.47	0.007	0.02554
1320.04	0.00675	0.02469
1318.61	0.0065	0.02392
1317.19	0.006	0.02322
1315.76	0.00575	0.02267
1314.33	0.0055	0.02228
1312.9	0.0055	0.02203
1311.48	0.0055	0.02187
1310.05	0.0055	0.02175
1308.62	0.00525	0.02162
1307.2	0.005	0.02146
1305.77	0.00475	0.02125
1304.34	0.00475	0.02098
1302.92	0.005	0.02068
1301.49	0.00525	0.02033
1300.06	0.00525	0.0199

## Sheet: 3b
Time(min)	2120cm-1	1547cm-1
0	0	0
0.5	0	0.004
1	0.003	0.009
1.5	0.005	0.012
2	0.006	0.038
2.5	0.0008	0.059
3	0.0003	0.075
3.5	0.001	0.087
4	0.0015	0.109
4.5	0.002	0.177
5	0.00257	0.185
5.5	0.0035	0.197
6	0.0044	0.207
6.5	0.0051	0.23
7	0.0071	0.262
7.5	0.0086	0.264
8	0.0168	0.285
8.5	0.0223	0.287
9	0.0214	0.288
9.5	0.0376	0.298
10	0.04228	0.291
10.5	0.052	0.297
11	0.061	0.299
11.5	0.073	0.3
12	0.086	0.299
12.5	0.1082	0.302
13	0.112	0.303
13.5	0.12	0.319
14	0.128	0.316
14.5	0.136	0.319
15	0.142	0.304
15.5	0.15	0.315
16	0.158	0.35
16.5	0.16	0.359
17	0.17	0.372
17.5	0.18	0.379
18	0.186	0.35
18.5	0.1901	0.393
19	0.192	0.404
19.5	0.206	0.421
20	0.222	0.441
20.5	0.243	0.475
21	0.265	0.509
21.5	0.235	0.452
22	0.274	0.523
22.5	0.282	0.542
23	0.284	0.549
23.5	0.286	0.556
24	0.287	0.559
24.5	0.288	0.565
25	0.281	0.555
25.5	0.287	0.568
26	0.284	0.562
26.5	0.284	0.563
27	0.277	0.556
27.5	0.297	0.594
28	0.292	0.587
28.5	0.287	0.583
29	0.272	0.557
29.5	0.283	0.576
30	0.278	0.574
30.5	0.287	0.586
31	0.287	0.59
31.5	0.271	0.56
32	0.28	0.581
32.5	0.288	0.593
33	0.275	0.573
33.5	0.284	0.593
34	0.279	0.584
34.5	0.272	0.577
35	0.275	0.584
35.5	0.273	0.581
36	0.268	0.573
36.5	0.264	0.568
37	0.276	0.59
37.5	0.278	0.598
38	0.264	0.575
38.5	0.267	0.578
39	0.27	0.585
39.5	0.259	0.564
40	0.259	0.569
40.5	0.26	0.571
41	0.263	0.579
41.5	0.253	0.564
42	0.247	0.552
42.5	0.262	0.583
43	0.266	0.589
43.5	0.25	0.56
44	0.258	0.577
44.5	0.27	0.602
45	0.258	0.582
45.5	0.263	0.595
46	0.271	0.611
46.5	0.258	0.589
47	0.24	0.551
47.5	0.255	0.584
48	0.255	0.582
48.5	0.244	0.566
49	0.26	0.598
49.5	0.248	0.578
50	0.242	0.568

## Sheet: 3c
	3018	2170	2120	2025	1925	1547
0	0	0	0	0	0	0.013
0.5	0	0	0	0.204	0.319	0.01
1	0.045	0.018	0	2.328	3.319	0.207
1.5	0.065	0.048	0	3.959	5.568	0.349
2	0.06	0.059	0	3.944	5.34	0.349
2.5	0.04	0.07	0.001	3.458	4.647	0.306
3	0.07	0.087	0	3.204	4.126	0.308
3.5	0.092	0.109	0	3.075	3.812	0.336
4	0.085	0.121	0.001	3.832	3.348	0.308
4.5	0.06	0.116	0.002	3.391	2.679	0.214
5	0.07	0.146	0.002	3.444	2.626	0.263
5.5	0.12	0.162	0.003	3.44	2.517	0.28
6	0.12	0.18	0.003	3.362	2.344	0.257
6.5	0.105	0.187	0.003	3.364	2.254	0.278
7	0.105	0.209	0.004	3.368	2.175	0.285
7.5	0.135	0.216	0.004	3.359	2.102	0.276
8	0.145	0.218	0.004	3.244	1.945	0.236
8.5	0.115	0.213	0.004	3.106	1.759	0.191
9	0.095	0.236	0.004	3.14	1.737	0.205
9.5	0.14	0.279	0.006	3.345	1.836	0.285
10	0.155	0.299	0.006	3.332	1.806	0.267
10.5	0.145	0.293	0.005	3.281	1.747	0.252
11	0.155	0.319	0.006	3.344	1.772	0.272
11.5	0.17	0.328	0.006	3.346	1.856	0.3
12	0.145	0.347	0.008	3.671	2.073	0.36
12.5	0.175	0.345	0.007	3.753	2.223	0.342
13	0.18	0.334	0.008	3.891	2.454	0.314
13.5	0.24	0.4323	0.01	3.669	3.322	0.487
14	0.215	0.425	0.01	4.044	3.801	0.473
14.5	0.21	0.442	0.007	4.435	4.238	0.517
15	0.23	0.438	0.009	4.463	4.257	0.51
15.5	0.235	0.511	0.011	4.928	4.694	0.642
16	0.22	0.491	0.01	4.823	4.533	0.59
16.5	0.295	0.518	0.012	4.888	4.539	0.592
17	0.305	0.518	0.012	4.761	4.328	0.586
17.5	0.295	0.611	0.013	4.62	4.165	0.6
18	0.26	0.561	0.013	4.839	4.277	0.636
18.5	0.255	0.522	0.009	4.454	3.855	0.539
19	0.24	0.535	0.013	4.393	3.73	0.531
19.5	0.275	0.571	0.012	4.501	3.782	0.602
20	0.265	0.563	0.01	4.405	3.591	0.578
20.5	0.26	0.53	0.01	4.163	3.368	0.526
21	0.205	0.537	0.011	4.407	3.207	0.504
21.5	0.255	0.569	0.013	4.201	3.248	0.566
22	0.295	0.634	0.014	4.35	3.358	0.639
22.5	0.295	0.611	0.013	4.162	3.165	0.6
23	0.29	0.604	0.014	4.125	3.064	0.597
23.5	0.29	0.619	0.015	4.107	2.978	0.624
24	0.295	0.68	0.015	4.283	3.096	0.7
24.5	0.32	0.658	0.014	4.206	2.999	0.695
25	0.3	0.637	0.014	3.973	2.753	0.604
25.5	0.37	0.748	0.017	4.426	3.056	0.833
26	0.35	0.744	0.017	4.341	2.949	0.81
26.5	0.285	0.702	0.015	4.101	2.814	0.714
27	0.345	0.769	0.017	4.307	2.845	0.829
27.5	0.315	0.791	0.015	4.332	2.816	0.832
28	0.355	0.778	0.018	4.243	2.716	0.848
28.5	0.37	0.78	0.019	4.24	2.794	0.832
29	0.34	0.797	0.02	4.183	2.729	0.873
29.5	0.315	0.679	0.016	3.715	2.658	0.674
30	0.31	0.737	0.018	3.943	2.685	0.786
30.5	0.41	0.814	0.018	4.132	2.669	0.897
31	0.34	0.826	0.019	4.185	2.685	0.919
31.5	0.36	0.765	0.02	3.922	2.674	0.814
32	0.325	0.796	0.02	3.999	2.678	0.886
32.5	0.335	0.695	0.017	3.571	2.721	0.709
33	0.4	0.815	0.019	3.958	2.713	0.898
33.5	0.415	0.877	0.021	4.118	2.808	0.994
34	0.415	0.872	0.02	4.078	2.653	0.966
34.5	0.395	0.858	0.022	4.016	2.54	0.982
35	0.385	0.849	0.022	3.972	2.542	0.97
35.5	0.355	0.843	0.021	3.91	2.555	0.928
36	0.37	0.791	0.02	3.7	2.623	0.897
36.5	0.34	0.845	0.021	3.81	2.624	0.944
37	0.44	0.886	0.021	3.974	2.46	1.047
37.5	0.41	0.879	0.023	3.928	2.585	1.041
38	0.365	0.883	0.022	3.864	2.704	1.024
38.5	0.315	0.758	0.021	3.431	2.78	0.812
39	0.405	0.879	0.022	3.781	2.658	1.006
39.5	0.365	0.89	0.024	3.814	2.713	1.073
40	0.415	0.888	0.022	3.804	2.708	1.076
40.5	0.325	0.859	0.02	3.677	2.753	1.045
41	0.385	0.929	0.023	3.822	2.754	1.139
41.5	0.415	0.914	0.024	3.809	2.742	1.132
42	0.375	0.946	0.025	3.833	2.755	1.185
42.5	0.4	0.95	0.027	3.841	2.785	1.203
43	0.43	0.95	0.023	3.873	2.774	1.24
43.5	0.41	0.978	0.027	3.851	2.78	1.25
44	0.43	0.971	0.026	3.832	2.795	1.238
44.5	0.44	0.985	0.026	3.855	2.725	1.272
45	0.44	0.97	0.025	3.802	2.7308	1.262
45.5	0.465	0.959	0.027	3.976	2.753	1.296
46	0.395	0.986	0.026	3.78	2.754	1.305
46.5	0.38	0.981	0.025	3.75	2.574	1.295
47	0.39	0.964	0.026	3.917	2.755	1.293
47.5	0.35	0.988	0.026	3.737	2.785	1.319
48	0.395	0.992	0.028	3.761	2.874	1.35
48.5	0.395	0.983	0.029	3.749	2.78	1.323
49	0.37	1.034	0.028	3.796	2.852	1.388
49.5	0.395	0.983	0.029	3.749	2.7213	1.323
50	0.37	1.034	0.028	3.796	2.708	1.388
					--
					--
					--
					--
					--
					--
					--

## Sheet: 3d
wavenumber	1	2	3	4	5	6	7	8	9	10
3200.92	8e-05	0.00072	0.00157	0.00246	0.00214	0.00195	0.00195	0.00131	0.00134	0.00089
3199.49	8e-05	0.00068	0.00155	0.00252	0.00206	0.00193	0.00193	0.00129	0.00134	0.00089
3198.06	8e-05	0.00064	0.00153	0.00258	0.002	0.00193	0.00193	0.00129	0.00134	0.00089
3196.64	8e-05	0.00066	0.00151	0.0026	0.00198	0.00193	0.00193	0.00129	0.00131	0.00089
3195.21	8e-05	0.00068	0.00151	0.00256	0.00202	0.00195	0.00195	0.00131	0.00131	0.00089
3193.78	8e-05	0.00068	0.00153	0.0025	0.00208	0.00197	0.00197	0.00131	0.00131	0.00089
3192.36	8e-05	0.00068	0.00155	0.00244	0.00212	0.00199	0.00199	0.00133	0.00131	0.00089
3190.93	8e-05	0.00066	0.00157	0.00242	0.00214	0.00197	0.00197	0.00133	0.00131	0.00089
3189.5	8e-05	0.00064	0.00157	0.00242	0.00214	0.00195	0.00195	0.00131	0.00128	0.00089
3188.07	8e-05	0.00064	0.00157	0.00242	0.00212	0.00191	0.00191	0.00129	0.00128	0.00089
3186.65	8e-05	0.00062	0.00155	0.00246	0.00206	0.00189	0.00189	0.00125	0.00128	0.0009
3185.22	8e-05	0.0006	0.00155	0.00248	0.00202	0.00187	0.00187	0.00125	0.00128	0.0009
3183.79	8e-05	0.00058	0.00155	0.00248	0.00198	0.00187	0.00187	0.00125	0.00128	0.0009
3182.37	8e-05	0.0006	0.00155	0.00246	0.002	0.00189	0.00189	0.00127	0.00128	0.0009
3180.94	8e-05	0.00062	0.00153	0.00244	0.00204	0.00187	0.00187	0.00127	0.00128	0.0009
3179.51	8e-05	0.00062	0.00151	0.00248	0.00204	0.00185	0.00185	0.00125	0.00128	0.00089
3178.09	8e-05	0.00062	0.00147	0.00254	0.002	0.00185	0.00185	0.00121	0.00128	0.00089
3176.66	8e-05	0.00062	0.00145	0.00252	0.00198	0.00187	0.00187	0.00121	0.00128	0.00089
3175.23	8e-05	0.00064	0.00143	0.00246	0.002	0.00191	0.00191	0.00125	0.00125	0.00088
3173.8	8e-05	0.00064	0.00145	0.00238	0.00206	0.00195	0.00195	0.00131	0.00125	0.00088
3172.38	6e-05	0.00064	0.00147	0.00234	0.0021	0.00195	0.00195	0.00135	0.00125	0.00088
3170.95	6e-05	0.00064	0.00147	0.0023	0.0021	0.00193	0.00193	0.00133	0.00125	0.00088
3169.52	6e-05	0.0006	0.00147	0.0023	0.00208	0.00191	0.00191	0.00131	0.00125	0.00087
3168.1	6e-05	0.00058	0.00145	0.00232	0.00204	0.00187	0.00187	0.00129	0.00125	0.00087
3166.67	8e-05	0.00058	0.00143	0.0023	0.00204	0.00185	0.00185	0.00129	0.00125	0.00087
3165.24	8e-05	0.00058	0.00143	0.00228	0.00208	0.00185	0.00185	0.00129	0.00125	0.00087
3163.81	8e-05	0.00058	0.00143	0.00224	0.0021	0.00185	0.00185	0.00129	0.00125	0.00087
3162.39	8e-05	0.00058	0.00145	0.00222	0.0021	0.00187	0.00187	0.00129	0.00125	0.00087
3160.96	8e-05	0.00058	0.00145	0.00224	0.00206	0.00189	0.00189	0.00129	0.00125	0.00087
3159.53	8e-05	0.0006	0.00147	0.00224	0.00202	0.00189	0.00189	0.00129	0.00125	0.00087
3158.11	6e-05	0.00062	0.00147	0.00226	0.002	0.00189	0.00189	0.00127	0.00125	0.00087
3156.68	6e-05	0.00064	0.00147	0.00226	0.002	0.00187	0.00187	0.00127	0.00122	0.00088
3155.25	6e-05	0.00062	0.00143	0.00226	0.00198	0.00187	0.00187	0.00125	0.00122	0.00088
3153.83	6e-05	0.0006	0.00141	0.00222	0.00194	0.00185	0.00185	0.00125	0.00122	0.00088
3152.4	6e-05	0.00058	0.00139	0.0022	0.00192	0.00183	0.00183	0.00125	0.00119	0.00088
3150.97	6e-05	0.00058	0.00139	0.0022	0.00194	0.00183	0.00183	0.00123	0.00119	0.00088
3149.54	6e-05	0.00058	0.00137	0.0022	0.00196	0.00185	0.00185	0.00123	0.00119	0.00087
3148.12	6e-05	0.0006	0.00137	0.0022	0.002	0.00187	0.00187	0.00123	0.00119	0.00087
3146.69	6e-05	0.0006	0.00135	0.0022	0.00202	0.00187	0.00187	0.00123	0.00116	0.00087
3145.26	6e-05	0.00058	0.00135	0.0022	0.00202	0.00185	0.00185	0.00127	0.00116	0.00087
3143.84	6e-05	0.00058	0.00135	0.0022	0.00202	0.00185	0.00185	0.00129	0.00116	0.00086
3142.41	6e-05	0.00056	0.00137	0.0022	0.002	0.00187	0.00187	0.00129	0.00116	0.00086
3140.98	6e-05	0.00056	0.00137	0.0022	0.00196	0.00185	0.00185	0.00127	0.00116	0.00087
3139.55	6e-05	0.00056	0.00135	0.0022	0.00194	0.00185	0.00185	0.00125	0.00119	0.00087
3138.13	6e-05	0.00056	0.00131	0.0022	0.00192	0.00183	0.00183	0.00125	0.00119	0.00087
3136.7	6e-05	0.00054	0.00129	0.00222	0.00192	0.00181	0.00181	0.00123	0.00119	0.00087
3135.27	6e-05	0.0005	0.00127	0.00226	0.00192	0.00175	0.00175	0.00119	0.00119	0.00087
3133.85	6e-05	0.00044	0.00127	0.00228	0.0019	0.00171	0.00171	0.00117	0.00119	0.00087
3132.42	6e-05	0.0004	0.00127	0.00228	0.00188	0.00169	0.00169	0.00115	0.00119	0.00088
3130.99	6e-05	0.00042	0.00129	0.00224	0.00188	0.00173	0.00173	0.00117	0.00119	0.00087
3129.57	6e-05	0.00044	0.00133	0.0022	0.00188	0.00175	0.00175	0.00119	0.00119	0.00087
3128.14	6e-05	0.00046	0.00133	0.00222	0.00188	0.00175	0.00175	0.00119	0.00119	0.00087
3126.71	6e-05	0.00046	0.00131	0.00224	0.00188	0.00171	0.00171	0.00119	0.00119	0.00087
3125.28	6e-05	0.00046	0.00131	0.00228	0.00188	0.00169	0.00169	0.00117	0.00119	0.00088
3123.86	6e-05	0.00044	0.00131	0.00232	0.00188	0.00169	0.00169	0.00117	0.00119	0.00088
3122.43	6e-05	0.00044	0.00131	0.00238	0.00188	0.00167	0.00167	0.00117	0.00119	0.00088
3121	6e-05	0.00044	0.00129	0.0024	0.00186	0.00167	0.00167	0.00117	0.00119	0.00088
3119.58	6e-05	0.00044	0.00127	0.00242	0.00184	0.00165	0.00165	0.00115	0.00119	0.00088
3118.15	6e-05	0.00044	0.00129	0.00242	0.0018	0.00165	0.00165	0.00113	0.00119	0.00087
3116.72	6e-05	0.00042	0.00127	0.00244	0.00178	0.00167	0.00167	0.00111	0.00119	0.00087
3115.29	6e-05	0.00042	0.00123	0.00242	0.00178	0.00167	0.00167	0.00111	0.00116	0.00086
3113.87	6e-05	0.00042	0.00119	0.00236	0.0018	0.00169	0.00169	0.00115	0.00116	0.00085
3112.44	6e-05	0.00042	0.00121	0.0023	0.00182	0.00169	0.00169	0.00119	0.00113	0.00084
3111.01	6e-05	0.00046	0.00125	0.00228	0.00182	0.00171	0.00171	0.00121	0.0011	0.00083
3109.59	6e-05	0.00046	0.00129	0.00228	0.00182	0.00173	0.00173	0.00121	0.0011	0.00083
3108.16	6e-05	0.00046	0.00129	0.00224	0.00184	0.00173	0.00173	0.00123	0.0011	0.00082
3106.73	6e-05	0.00046	0.00129	0.0022	0.00184	0.00175	0.00175	0.00123	0.0011	0.00082
3105.3	6e-05	0.00046	0.00127	0.00218	0.00184	0.00175	0.00175	0.00123	0.0011	0.00082
3103.88	6e-05	0.00046	0.00125	0.0022	0.0018	0.00171	0.00171	0.00121	0.0011	0.00083
3102.45	6e-05	0.00044	0.00121	0.00226	0.00174	0.00163	0.00163	0.00119	0.00113	0.00083
3101.02	6e-05	0.0004	0.00115	0.0023	0.0017	0.00157	0.00157	0.00115	0.00113	0.00084
3099.6	6e-05	0.0004	0.00113	0.00232	0.0017	0.00153	0.00153	0.00111	0.00113	0.00084
3098.17	6e-05	0.0004	0.00115	0.0023	0.00172	0.00153	0.00153	0.00109	0.00113	0.00084
3096.74	6e-05	0.00038	0.00117	0.0023	0.00174	0.00155	0.00155	0.00107	0.00113	0.00084
3095.32	6e-05	0.00038	0.00115	0.00226	0.00174	0.00157	0.00157	0.00107	0.00113	0.00084
3093.89	6e-05	0.00038	0.00113	0.0022	0.00174	0.00157	0.00157	0.00107	0.0011	0.00083
3092.46	6e-05	0.00038	0.00113	0.0021	0.00176	0.00159	0.00159	0.00107	0.0011	0.00083
3091.03	6e-05	0.0004	0.00113	0.002	0.00178	0.00163	0.00163	0.00109	0.00107	0.00082
3089.61	6e-05	0.00042	0.00115	0.00196	0.00182	0.00165	0.00165	0.00109	0.00107	0.00082
3088.18	6e-05	0.00042	0.00117	0.00192	0.00182	0.00167	0.00167	0.00111	0.00104	0.00081
3086.75	4e-05	0.00044	0.00119	0.00192	0.0018	0.00167	0.00167	0.00113	0.00104	0.00081
3085.33	4e-05	0.00044	0.00121	0.00194	0.00178	0.00167	0.00167	0.00115	0.00107	0.00081
3083.9	4e-05	0.00044	0.00119	0.00198	0.00176	0.00165	0.00165	0.00115	0.00107	0.00081
3082.47	6e-05	0.00042	0.00117	0.00204	0.00172	0.00161	0.00161	0.00113	0.00107	0.00081
3081.04	6e-05	0.00038	0.00115	0.00212	0.0017	0.00159	0.00159	0.00111	0.00107	0.00081
3079.62	6e-05	0.00036	0.00113	0.00214	0.00168	0.00157	0.00157	0.00109	0.00107	0.00081
3078.19	6e-05	0.00036	0.00113	0.00212	0.00168	0.00159	0.00159	0.00111	0.00107	0.00081
3076.76	6e-05	0.0004	0.00113	0.00206	0.00168	0.00161	0.00161	0.00111	0.00107	0.0008
3075.34	6e-05	0.00044	0.00113	0.00198	0.0017	0.00163	0.00163	0.00113	0.00107	0.0008
3073.91	4e-05	0.00044	0.00115	0.00196	0.00172	0.00165	0.00165	0.00113	0.00107	0.0008
3072.48	4e-05	0.00046	0.00115	0.00194	0.00172	0.00167	0.00167	0.00113	0.00104	0.0008
3071.06	4e-05	0.00044	0.00113	0.00198	0.00174	0.00165	0.00165	0.00113	0.00104	0.0008
3069.63	4e-05	0.00042	0.00111	0.002	0.00174	0.00161	0.00161	0.00113	0.00104	0.0008
3068.2	4e-05	0.00038	0.00109	0.00206	0.00172	0.00157	0.00157	0.00111	0.00101	0.0008
3066.77	4e-05	0.00034	0.00107	0.00214	0.00168	0.00151	0.00151	0.00109	0.00101	0.0008
3065.35	4e-05	0.00032	0.00107	0.00218	0.00164	0.00151	0.00151	0.00105	0.00101	0.00081
3063.92	4e-05	0.00032	0.00107	0.00216	0.00162	0.00153	0.00153	0.00105	0.00101	0.00081
3062.49	4e-05	0.00034	0.00109	0.00212	0.00164	0.00155	0.00155	0.00105	0.00101	0.00081
3061.07	4e-05	0.00036	0.00109	0.00206	0.00164	0.00157	0.00157	0.00109	0.00101	0.00081
3059.64	4e-05	0.00036	0.00109	0.002	0.00164	0.00155	0.00155	0.00109	0.00101	0.00081
3058.21	4e-05	0.00034	0.00107	0.00198	0.00162	0.00153	0.00153	0.00109	0.00101	0.00081
3056.78	4e-05	0.00032	0.00107	0.00198	0.00162	0.00149	0.00149	0.00107	0.00101	0.0008
3055.36	4e-05	0.00032	0.00107	0.00198	0.00164	0.00149	0.00149	0.00107	0.00101	0.0008
3053.93	4e-05	0.00032	0.00107	0.00192	0.00166	0.00149	0.00149	0.00107	0.00101	0.0008
3052.5	6e-05	0.00032	0.00109	0.00188	0.00166	0.00149	0.00149	0.00109	0.00101	0.0008
3051.08	4e-05	0.00034	0.00109	0.00186	0.00164	0.00151	0.00151	0.00111	0.00101	0.0008
3049.65	4e-05	0.00032	0.00111	0.00188	0.00164	0.00151	0.00151	0.00111	0.00101	0.0008
3048.22	4e-05	0.00032	0.00109	0.0019	0.00164	0.00151	0.00151	0.00109	0.00101	0.0008
3046.8	4e-05	0.00034	0.00109	0.00188	0.00166	0.00155	0.00155	0.00109	0.00098	0.00079
3045.37	4e-05	0.00036	0.00107	0.00182	0.00166	0.00157	0.00157	0.00109	0.00098	0.00079
3043.94	4e-05	0.00038	0.00105	0.0018	0.00168	0.00159	0.00159	0.00111	0.00098	0.00079
3042.51	4e-05	0.00038	0.00107	0.0018	0.00168	0.00157	0.00157	0.00113	0.00098	0.0008
3041.09	4e-05	0.00038	0.00107	0.00182	0.00166	0.00157	0.00157	0.00113	0.00098	0.0008
3039.66	4e-05	0.00036	0.00107	0.00182	0.00166	0.00153	0.00153	0.00113	0.00101	0.0008
3038.23	4e-05	0.00034	0.00107	0.00184	0.00164	0.00151	0.00151	0.00111	0.00101	0.00081
3036.81	4e-05	0.00032	0.00107	0.0019	0.00164	0.00149	0.00149	0.00109	0.00104	0.00081
3035.38	4e-05	0.0003	0.00105	0.00198	0.00162	0.00145	0.00145	0.00105	0.00104	0.00081
3033.95	4e-05	0.00026	0.00103	0.00206	0.0016	0.00145	0.00145	0.00101	0.00107	0.00081
3032.52	4e-05	0.00024	0.00101	0.00212	0.00158	0.00143	0.00143	0.00099	0.00107	0.00081
3031.1	4e-05	0.00024	0.00101	0.00212	0.00156	0.00143	0.00143	0.00097	0.00107	0.00081
3029.67	4e-05	0.00026	0.00103	0.00206	0.00156	0.00147	0.00147	0.00099	0.00107	0.00082
3028.24	4e-05	0.0003	0.00105	0.00198	0.00158	0.00151	0.00151	0.00101	0.00104	0.00082
3026.82	4e-05	0.0003	0.00105	0.0019	0.0016	0.00153	0.00153	0.00103	0.00104	0.00081
3025.39	4e-05	0.0003	0.00103	0.00186	0.00162	0.00153	0.00153	0.00105	0.00104	0.00081
3023.96	4e-05	0.0003	0.00103	0.00188	0.00164	0.00153	0.00153	0.00105	0.00104	0.0008
3022.53	4e-05	0.0003	0.00103	0.00188	0.00164	0.00153	0.00153	0.00105	0.00101	0.00079
3021.11	4e-05	0.00028	0.00103	0.00186	0.00164	0.00155	0.00155	0.00105	0.00101	0.00079
3019.68	4e-05	0.00028	0.00103	0.00182	0.00162	0.00155	0.00155	0.00105	0.00104	0.00079
3018.25	4e-05	0.00028	0.00101	0.00178	0.0016	0.00153	0.00153	0.00105	0.00104	0.00079
3016.83	4e-05	0.0003	0.00099	0.00178	0.0016	0.00151	0.00151	0.00105	0.00104	0.00079
3015.4	4e-05	0.0003	0.00097	0.00182	0.0016	0.00147	0.00147	0.00105	0.00104	0.00079
3013.97	4e-05	0.0003	0.00097	0.0019	0.0016	0.00145	0.00145	0.00105	0.00104	0.00079
3012.55	4e-05	0.00028	0.00097	0.00198	0.00158	0.00143	0.00143	0.00105	0.00104	0.00079
3011.12	4e-05	0.00028	0.00099	0.002	0.00158	0.00143	0.00143	0.00103	0.00104	0.00079
3009.69	4e-05	0.0003	0.00099	0.00198	0.0016	0.00143	0.00143	0.00103	0.00104	0.0008
3008.26	4e-05	0.00032	0.00101	0.00194	0.00162	0.00145	0.00145	0.00103	0.00104	0.0008
3006.84	4e-05	0.00032	0.00101	0.00192	0.00162	0.00147	0.00147	0.00105	0.00104	0.0008
3005.41	4e-05	0.0003	0.00101	0.00192	0.00162	0.00147	0.00147	0.00105	0.00104	0.0008
3003.98	4e-05	0.00028	0.00101	0.0019	0.0016	0.00147	0.00147	0.00105	0.00104	0.0008
3002.56	4e-05	0.00028	0.00103	0.00186	0.0016	0.00149	0.00149	0.00107	0.00104	0.0008
3001.13	4e-05	0.0003	0.00105	0.00182	0.0016	0.00149	0.00149	0.00107	0.00104	0.0008
2999.7	4e-05	0.00032	0.00105	0.00178	0.0016	0.00151	0.00151	0.00107	0.00107	0.0008
2998.27	4e-05	0.0003	0.00103	0.00178	0.0016	0.00151	0.00151	0.00105	0.00107	0.0008
2996.85	4e-05	0.00028	0.00101	0.0018	0.0016	0.00149	0.00149	0.00105	0.00107	0.0008
2995.42	4e-05	0.00028	0.00099	0.00184	0.0016	0.00147	0.00147	0.00105	0.00107	0.0008
2993.99	4e-05	0.00028	0.00097	0.00188	0.0016	0.00147	0.00147	0.00103	0.00107	0.0008
2992.57	4e-05	0.0003	0.00097	0.00188	0.0016	0.00145	0.00145	0.00105	0.00107	0.0008
2991.14	4e-05	0.0003	0.00095	0.00186	0.0016	0.00145	0.00145	0.00105	0.00107	0.0008
2989.71	4e-05	0.00028	0.00095	0.00182	0.0016	0.00145	0.00145	0.00107	0.00107	0.0008
2988.29	4e-05	0.00028	0.00097	0.00182	0.00162	0.00145	0.00145	0.00107	0.00107	0.0008
2986.86	4e-05	0.0003	0.00099	0.00184	0.00162	0.00145	0.00145	0.00107	0.00107	0.0008
2985.43	4e-05	0.0003	0.00101	0.00184	0.00162	0.00147	0.00147	0.00107	0.00107	0.0008
2984	4e-05	0.00032	0.00103	0.00184	0.0016	0.00149	0.00149	0.00107	0.00107	0.0008
2982.58	4e-05	0.0003	0.00101	0.00186	0.0016	0.00149	0.00149	0.00107	0.00107	0.00081
2981.15	4e-05	0.0003	0.00101	0.00188	0.0016	0.00147	0.00147	0.00105	0.00107	0.00081
2979.72	4e-05	0.00028	0.00103	0.0019	0.00162	0.00145	0.00145	0.00105	0.00107	0.00081
2978.3	4e-05	0.0003	0.00105	0.00192	0.00164	0.00145	0.00145	0.00105	0.00107	0.00081
2976.87	4e-05	0.00032	0.00109	0.00194	0.00166	0.00147	0.00147	0.00105	0.00107	0.00081
2975.44	4e-05	0.00034	0.00113	0.00198	0.00166	0.00149	0.00149	0.00105	0.00107	0.00081
2974.01	4e-05	0.00036	0.00117	0.00204	0.0017	0.00151	0.00151	0.00105	0.00107	0.0008
2972.59	4e-05	0.0004	0.00123	0.00208	0.00176	0.00155	0.00155	0.00109	0.00107	0.0008
2971.16	4e-05	0.00042	0.00127	0.0021	0.0018	0.00159	0.00159	0.00111	0.00107	0.00079
2969.73	4e-05	0.00044	0.00131	0.00212	0.00184	0.00163	0.00163	0.00115	0.00107	0.00079
2968.31	4e-05	0.00046	0.00131	0.00214	0.00186	0.00165	0.00165	0.00117	0.00107	0.00079
2966.88	4e-05	0.00046	0.00131	0.00214	0.00186	0.00165	0.00165	0.00115	0.00107	0.00078
2965.45	4e-05	0.00048	0.00131	0.00214	0.00186	0.00163	0.00163	0.00115	0.00107	0.00078
2964.02	4e-05	0.00048	0.00131	0.00214	0.00188	0.00163	0.00163	0.00117	0.00107	0.00078
2962.6	4e-05	0.00048	0.00133	0.00216	0.0019	0.00165	0.00165	0.00117	0.00107	0.00078
2961.17	4e-05	0.00046	0.00133	0.00218	0.00192	0.00167	0.00167	0.00119	0.00107	0.00078
2959.74	4e-05	0.00046	0.00133	0.0022	0.00194	0.00169	0.00169	0.00119	0.00107	0.00078
2958.32	4e-05	0.00046	0.00135	0.00222	0.00194	0.00173	0.00173	0.00119	0.00107	0.00078
2956.89	4e-05	0.00046	0.00137	0.00226	0.00196	0.00175	0.00175	0.00119	0.00107	0.00078
2955.46	4e-05	0.00048	0.00137	0.0023	0.00196	0.00175	0.00175	0.00119	0.00107	0.00078
2954.04	4e-05	0.00048	0.00137	0.00232	0.00196	0.00173	0.00173	0.00119	0.00107	0.00078
2952.61	4e-05	0.00046	0.00135	0.0023	0.00196	0.00171	0.00171	0.00119	0.00107	0.00078
2951.18	4e-05	0.00044	0.00133	0.00226	0.00194	0.00169	0.00169	0.00117	0.00107	0.00078
2949.75	4e-05	0.00042	0.00129	0.00222	0.0019	0.00167	0.00167	0.00115	0.00107	0.00078
2948.33	4e-05	0.0004	0.00125	0.00218	0.00186	0.00167	0.00167	0.00115	0.00107	0.00077
2946.9	4e-05	0.00038	0.00119	0.00214	0.00184	0.00165	0.00165	0.00115	0.00107	0.00077
2945.47	4e-05	0.00036	0.00115	0.00208	0.0018	0.00165	0.00165	0.00115	0.00107	0.00077
2944.05	4e-05	0.00034	0.00111	0.00204	0.00178	0.00161	0.00161	0.00115	0.00107	0.00077
2942.62	4e-05	0.00032	0.00111	0.00202	0.00174	0.00157	0.00157	0.00113	0.00107	0.00077
2941.19	4e-05	0.00032	0.00109	0.00198	0.00172	0.00155	0.00155	0.00113	0.00107	0.00077
2939.76	4e-05	0.00032	0.00109	0.00194	0.0017	0.00153	0.00153	0.00113	0.00107	0.00077
2938.34	4e-05	0.0003	0.00107	0.00192	0.00166	0.00153	0.00153	0.00111	0.00107	0.00077
2936.91	4e-05	0.00028	0.00107	0.0019	0.00164	0.00153	0.00153	0.00109	0.00107	0.00077
2935.48	4e-05	0.00028	0.00103	0.0019	0.00164	0.00151	0.00151	0.00107	0.00107	0.00077
2934.06	4e-05	0.00028	0.00101	0.00188	0.00164	0.00149	0.00149	0.00105	0.00107	0.00077
2932.63	4e-05	0.00028	0.00099	0.00184	0.00164	0.00147	0.00147	0.00103	0.00107	0.00077
2931.2	4e-05	0.00028	0.00099	0.00182	0.00164	0.00143	0.00143	0.00103	0.00107	0.00077
2929.78	4e-05	0.00028	0.00097	0.0018	0.00162	0.00143	0.00143	0.00103	0.00107	0.00077
2928.35	4e-05	0.00028	0.00097	0.00178	0.0016	0.00145	0.00145	0.00105	0.00107	0.00077
2926.92	4e-05	0.00026	0.00097	0.00176	0.0016	0.00145	0.00145	0.00105	0.00107	0.00077
2925.49	4e-05	0.00028	0.00093	0.00176	0.00158	0.00145	0.00145	0.00105	0.00107	0.00077
2924.07	4e-05	0.00028	0.00091	0.00176	0.00158	0.00145	0.00145	0.00103	0.00104	0.00077
2922.64	4e-05	0.00026	0.00087	0.00176	0.00156	0.00143	0.00143	0.00101	0.00104	0.00076
2921.21	4e-05	0.00026	0.00087	0.00176	0.00154	0.00141	0.00141	0.00101	0.00104	0.00076
2919.79	4e-05	0.00024	0.00087	0.00174	0.0015	0.00139	0.00139	0.00101	0.00104	0.00076
2918.36	4e-05	0.00024	0.00087	0.00172	0.0015	0.00139	0.00139	0.00101	0.00104	0.00075
2916.93	2e-05	0.00024	0.00087	0.0017	0.0015	0.00137	0.00137	0.00101	0.00104	0.00075
2915.5	2e-05	0.00024	0.00087	0.00168	0.0015	0.00137	0.00137	0.00103	0.00104	0.00075
2914.08	2e-05	0.00022	0.00087	0.00166	0.0015	0.00139	0.00139	0.00103	0.00104	0.00075
2912.65	4e-05	0.00022	0.00089	0.00162	0.0015	0.00139	0.00139	0.00101	0.00104	0.00075
2911.22	4e-05	0.00022	0.00089	0.0016	0.0015	0.00141	0.00141	0.00101	0.00104	0.00075
2909.8	4e-05	0.00022	0.00089	0.00162	0.00148	0.00141	0.00141	0.00103	0.00104	0.00075
2908.37	4e-05	0.00024	0.00091	0.00162	0.00148	0.00141	0.00141	0.00103	0.00107	0.00075
2906.94	4e-05	0.00024	0.00091	0.00164	0.00148	0.00141	0.00141	0.00103	0.00107	0.00075
2905.52	4e-05	0.00024	0.00093	0.00166	0.0015	0.00141	0.00141	0.00103	0.00107	0.00074
2904.09	4e-05	0.00024	0.00093	0.00168	0.0015	0.00141	0.00141	0.00103	0.00104	0.00074
2902.66	4e-05	0.00024	0.00095	0.0017	0.0015	0.00141	0.00141	0.00103	0.00104	0.00074
2901.23	4e-05	0.00026	0.00095	0.00172	0.0015	0.00141	0.00141	0.00105	0.00101	0.00074
2899.81	2e-05	0.00026	0.00095	0.00174	0.00152	0.00143	0.00143	0.00105	0.00101	0.00074
2898.38	2e-05	0.00026	0.00095	0.00174	0.00152	0.00143	0.00143	0.00105	0.00101	0.00074
2896.95	2e-05	0.00026	0.00097	0.00178	0.00152	0.00143	0.00143	0.00105	0.00098	0.00074
2895.53	2e-05	0.00026	0.00099	0.0018	0.00152	0.00143	0.00143	0.00105	0.00098	0.00074
2894.1	2e-05	0.00028	0.00103	0.00184	0.00156	0.00143	0.00143	0.00105	0.00098	0.00074
2892.67	2e-05	0.0003	0.00103	0.00186	0.0016	0.00143	0.00143	0.00105	0.00098	0.00073
2891.24	2e-05	0.0003	0.00105	0.00186	0.00162	0.00145	0.00145	0.00107	0.00098	0.00073
2889.82	2e-05	0.0003	0.00105	0.00186	0.00164	0.00147	0.00147	0.00107	0.00098	0.00073
2888.39	4e-05	0.00032	0.00103	0.00186	0.00164	0.00147	0.00147	0.00107	0.00098	0.00073
2886.96	4e-05	0.00032	0.00105	0.00186	0.00166	0.00149	0.00149	0.00109	0.00098	0.00073
2885.54	2e-05	0.00034	0.00105	0.00184	0.00168	0.00149	0.00149	0.00109	0.00098	0.00073
2884.11	2e-05	0.00036	0.00105	0.00186	0.0017	0.00149	0.00149	0.00109	0.00098	0.00074
2882.68	2e-05	0.00036	0.00107	0.00186	0.0017	0.00149	0.00149	0.00111	0.00098	0.00074
2881.25	2e-05	0.00034	0.00105	0.00186	0.00168	0.00149	0.00149	0.00111	0.00101	0.00074
2879.83	2e-05	0.00032	0.00105	0.00184	0.00166	0.00149	0.00149	0.00109	0.00101	0.00074
2878.4	2e-05	0.0003	0.00103	0.00184	0.00164	0.00149	0.00149	0.00107	0.00101	0.00074
2876.97	2e-05	0.00028	0.00099	0.00184	0.0016	0.00147	0.00147	0.00105	0.00101	0.00074
2875.55	2e-05	0.00028	0.00097	0.00182	0.00156	0.00145	0.00145	0.00105	0.00101	0.00073
2874.12	2e-05	0.00026	0.00095	0.00178	0.00154	0.00143	0.00143	0.00105	0.00101	0.00073
2872.69	2e-05	0.00026	0.00093	0.00174	0.00152	0.00143	0.00143	0.00105	0.00104	0.00073
2871.27	2e-05	0.00026	0.00091	0.00172	0.0015	0.00143	0.00143	0.00105	0.00104	0.00072
2869.84	2e-05	0.00028	0.00089	0.00168	0.0015	0.00143	0.00143	0.00105	0.00104	0.00072
2868.41	2e-05	0.00028	0.00089	0.00164	0.00148	0.00143	0.00143	0.00103	0.00104	0.00072
2866.98	2e-05	0.00026	0.00087	0.00162	0.00148	0.00141	0.00141	0.00103	0.00104	0.00072
2865.56	2e-05	0.00024	0.00085	0.0016	0.00146	0.00139	0.00139	0.00101	0.00104	0.00072
2864.13	2e-05	0.00022	0.00081	0.00158	0.00144	0.00135	0.00135	0.00101	0.00104	0.00072
2862.7	2e-05	0.0002	0.00079	0.00158	0.00142	0.00135	0.00135	0.00101	0.00104	0.00072
2861.28	2e-05	0.0002	0.00077	0.00156	0.00142	0.00135	0.00135	0.00099	0.00104	0.00072
2859.85	2e-05	0.0002	0.00075	0.00156	0.00142	0.00137	0.00137	0.00099	0.00101	0.00072
2858.42	2e-05	0.0002	0.00075	0.00154	0.0014	0.00135	0.00135	0.00099	0.00101	0.00072
2856.99	2e-05	0.0002	0.00075	0.00154	0.00138	0.00133	0.00133	0.00097	0.00098	0.00072
2855.57	2e-05	0.00018	0.00073	0.0015	0.00136	0.00131	0.00131	0.00097	0.00098	0.00071
2854.14	2e-05	0.00016	0.00069	0.00146	0.00132	0.00129	0.00129	0.00097	0.00095	0.00071
2852.71	2e-05	0.00014	0.00067	0.0014	0.0013	0.00129	0.00129	0.00095	0.00095	0.00071
2851.29	2e-05	0.00012	0.00063	0.00136	0.0013	0.00127	0.00127	0.00095	0.00095	0.0007
2849.86	2e-05	0.0001	0.00059	0.00134	0.00128	0.00125	0.00125	0.00093	0.00095	0.0007
2848.43	2e-05	8e-05	0.00059	0.00132	0.00128	0.00123	0.00123	0.00091	0.00095	0.0007
2847.01	2e-05	8e-05	0.00057	0.0013	0.00124	0.00121	0.00121	0.00091	0.00095	0.0007
2845.58	2e-05	0.0001	0.00057	0.00128	0.00122	0.00119	0.00119	0.00089	0.00095	0.0007
2844.15	2e-05	0.0001	0.00057	0.00128	0.00118	0.00119	0.00119	0.00089	0.00095	0.0007
2842.72	2e-05	0.0001	0.00059	0.00128	0.00118	0.00119	0.00119	0.00091	0.00098	0.0007
2841.3	2e-05	8e-05	0.00057	0.00126	0.00118	0.00119	0.00119	0.00091	0.00098	0.0007
2839.87	2e-05	8e-05	0.00057	0.00124	0.00118	0.00117	0.00117	0.00091	0.00098	0.0007
2838.44	2e-05	6e-05	0.00053	0.00124	0.00116	0.00117	0.00117	0.00091	0.00098	0.0007
2837.02	2e-05	6e-05	0.00051	0.00124	0.00114	0.00117	0.00117	0.00089	0.00098	0.0007
2835.59	2e-05	4e-05	0.00051	0.00126	0.00114	0.00117	0.00117	0.00089	0.00098	0.0007
2834.16	2e-05	4e-05	0.00051	0.00126	0.00114	0.00117	0.00117	0.00087	0.00098	0.0007
2832.73	2e-05	4e-05	0.00051	0.00126	0.00116	0.00115	0.00115	0.00087	0.00098	0.0007
2831.31	2e-05	4e-05	0.00051	0.00124	0.00116	0.00113	0.00113	0.00089	0.00098	0.0007
2829.88	2e-05	4e-05	0.00051	0.00124	0.00116	0.00111	0.00111	0.00089	0.00098	0.00069
2828.45	2e-05	4e-05	0.00051	0.00122	0.00116	0.00111	0.00111	0.00089	0.00098	0.00069
2827.03	2e-05	4e-05	0.00049	0.0012	0.00114	0.00111	0.00111	0.00089	0.00098	0.00068
2825.6	2e-05	4e-05	0.00049	0.00118	0.00114	0.00113	0.00113	0.00089	0.00098	0.00068
2824.17	2e-05	4e-05	0.00047	0.00114	0.00112	0.00113	0.00113	0.00087	0.00098	0.00068
2822.74	2e-05	4e-05	0.00045	0.00114	0.0011	0.00115	0.00115	0.00087	0.00098	0.00069
2821.32	2e-05	2e-05	0.00043	0.00112	0.00108	0.00115	0.00115	0.00087	0.00098	0.00069
2819.89	2e-05	2e-05	0.00041	0.0011	0.00106	0.00115	0.00115	0.00087	0.00098	0.00069
2818.46	2e-05	0	0.00039	0.00108	0.00104	0.00113	0.00113	0.00085	0.00098	0.00069
2817.04	2e-05	0	0.00035	0.00106	0.00104	0.00113	0.00113	0.00085	0.00101	0.00069
2815.61	2e-05	0	0.00033	0.00104	0.00104	0.00113	0.00113	0.00085	0.00101	0.00069
2814.18	2e-05	0	0.00033	0.00104	0.00102	0.00111	0.00111	0.00083	0.00101	0.00069
2812.76	2e-05	0	0.00033	0.00104	0.00102	0.00111	0.00111	0.00083	0.00101	0.00068
2811.33	2e-05	0	0.00033	0.00104	0.00102	0.00111	0.00111	0.00083	0.00101	0.00068
2809.9	2e-05	0	0.00031	0.00104	0.001	0.00109	0.00109	0.00083	0.00098	0.00068
2808.47	2e-05	0	0.00031	0.00102	0.001	0.00109	0.00109	0.00083	0.00098	0.00067
2807.05	2e-05	-2e-05	0.00031	0.001	0.001	0.00109	0.00109	0.00085	0.00098	0.00067
2805.62	2e-05	-2e-05	0.00031	0.001	0.001	0.00107	0.00107	0.00085	0.00095	0.00066
2804.19	2e-05	0	0.00029	0.001	0.00102	0.00105	0.00105	0.00085	0.00095	0.00066
2802.77	2e-05	0	0.00029	0.001	0.00102	0.00105	0.00105	0.00085	0.00095	0.00066
2801.34	2e-05	0	0.00029	0.001	0.001	0.00103	0.00103	0.00085	0.00095	0.00066
2200.54	0	0.00026	0.00036	0.00085	0.00069	0.00091	0.00091	0.00064	0.00145	0.00048
2199.12	0	0.00026	0.00036	0.00084	0.00068	0.00091	0.00091	0.00064	0.00145	0.00047
2197.69	0	0.00025	0.00033	0.00083	0.00067	0.0009	0.0009	0.00064	0.00145	0.00047
2196.26	0	0.00025	0.00033	0.00083	0.00066	0.0009	0.0009	0.00064	0.00145	0.00047
2194.83	0	0.00025	0.00033	0.00083	0.00065	0.0009	0.0009	0.00064	0.00145	0.00047
2193.41	0	0.00025	0.00033	0.00083	0.00065	0.0009	0.0009	0.00065	0.00145	0.00047
2191.98	0	0.00025	0.00033	0.00083	0.00065	0.0009	0.0009	0.00065	0.00145	0.00047
2190.55	0	0.00025	0.00033	0.00083	0.00064	0.00091	0.00091	0.00065	0.00145	0.00047
2189.13	0	0.00025	0.00033	0.00083	0.00064	0.00091	0.00091	0.00065	0.00146	0.00047
2187.7	0	0.00024	0.00033	0.00082	0.00064	0.0009	0.0009	0.00065	0.00146	0.00047
2186.27	0	0.00024	0.00033	0.00083	0.00064	0.0009	0.0009	0.00065	0.00146	0.00047
2184.84	0	0.00024	0.00033	0.00083	0.00064	0.0009	0.0009	0.00065	0.00146	0.00048
2183.42	0	0.00024	0.00033	0.00083	0.00064	0.0009	0.0009	0.00064	0.00147	0.00048
2181.99	0	0.00024	0.00033	0.00082	0.00063	0.00091	0.00091	0.00065	0.00147	0.00048
2180.56	0	0.00024	0.00033	0.00082	0.00063	0.00091	0.00091	0.00065	0.00147	0.00048
2179.14	0	0.00024	0.00033	0.00082	0.00063	0.00091	0.00091	0.00065	0.00147	0.00048
2177.71	0	0.00024	0.00033	0.00082	0.00062	0.0009	0.0009	0.00065	0.00147	0.00048
2176.28	0	0.00024	0.00033	0.00081	0.00062	0.0009	0.0009	0.00065	0.00147	0.00048
2174.86	0	0.00023	0.00033	0.00081	0.00062	0.0009	0.0009	0.00065	0.00147	0.00048
2173.43	0	0.00023	0.00033	0.00081	0.00062	0.0009	0.0009	0.00065	0.00147	0.00048
2172	0	0.00023	0.0003	0.00081	0.00062	0.0009	0.0009	0.00065	0.00147	0.00048
2170.57	0	0.00023	0.0003	0.00081	0.00062	0.0009	0.0009	0.00065	0.00147	0.00048
2169.15	0	0.00023	0.0003	0.0008	0.00061	0.0009	0.0009	0.00065	0.00148	0.00048
2167.72	0	0.00023	0.0003	0.0008	0.00061	0.00091	0.00091	0.00065	0.00148	0.00048
2166.29	0	0.00023	0.0003	0.0008	0.00061	0.00091	0.00091	0.00066	0.00148	0.00048
2164.87	0	0.00023	0.0003	0.00081	0.00062	0.00091	0.00091	0.00066	0.00148	0.00048
2163.44	0	0.00023	0.0003	0.00081	0.00062	0.00091	0.00091	0.00066	0.00148	0.00048
2162.01	0	0.00023	0.0003	0.00081	0.00062	0.00091	0.00091	0.00066	0.00149	0.00048
2160.58	0	0.00023	0.0003	0.00081	0.00062	0.00091	0.00091	0.00066	0.00149	0.00048
2159.16	0	0.00023	0.0003	0.00081	0.00062	0.00091	0.00091	0.00066	0.00149	0.00048
2157.73	0	0.00023	0.0003	0.0008	0.00062	0.00091	0.00091	0.00066	0.00149	0.00049
2156.3	0	0.00023	0.0003	0.0008	0.00062	0.00091	0.00091	0.00066	0.00149	0.00049
2154.88	0	0.00023	0.0003	0.0008	0.00061	0.00091	0.00091	0.00066	0.00149	0.00049
2153.45	0	0.00023	0.0003	0.0008	0.00061	0.00091	0.00091	0.00065	0.0015	0.00049
2152.02	0	0.00023	0.0003	0.0008	0.00061	0.00091	0.00091	0.00065	0.0015	0.00049
2150.59	0	0.00023	0.0003	0.0008	0.00061	0.00091	0.00091	0.00065	0.0015	0.00049
2149.17	0	0.00023	0.0003	0.00081	0.00061	0.00091	0.00091	0.00066	0.00151	0.00049
2147.74	0	0.00023	0.0003	0.0008	0.00061	0.00091	0.00091	0.00065	0.00151	0.00049
2146.31	0	0.00023	0.0003	0.0008	0.00061	0.00091	0.00091	0.00065	0.00152	0.00049
2144.89	0	0.00023	0.0003	0.0008	0.00061	0.00091	0.00091	0.00065	0.00152	0.00049
2143.46	0	0.00023	0.0003	0.0008	0.00061	0.00091	0.00091	0.00066	0.00152	0.00049
2142.03	0	0.00023	0.0003	0.0008	0.00061	0.00092	0.00092	0.00066	0.00152	0.00049
2140.61	0	0.00023	0.0003	0.0008	0.00061	0.00092	0.00092	0.00067	0.00152	0.00049
2139.18	0	0.00023	0.0003	0.0008	0.00062	0.00093	0.00093	0.00068	0.00152	0.00049
2137.75	0	0.00023	0.0003	0.0008	0.00062	0.00094	0.00094	0.0007	0.00153	0.00049
2136.32	0	0.00023	0.0003	0.0008	0.00062	0.00096	0.00096	0.00072	0.00153	0.00049
2134.9	0	0.00023	0.0003	0.0008	0.00063	0.00097	0.00097	0.00074	0.00153	0.00049
2133.47	0	0.00023	0.0003	0.0008	0.00064	0.001	0.001	0.00077	0.00154	0.0005
2132.04	0	0.00023	0.0003	0.00081	0.00066	0.00104	0.00104	0.00081	0.00157	0.0005
2130.62	0	0.00024	0.00033	0.00083	0.0007	0.00111	0.00111	0.00088	0.00161	0.00052
2129.19	0	0.00025	0.00033	0.00084	0.00074	0.0012	0.0012	0.00098	0.00167	0.00054
2127.76	0	0.00025	0.00036	0.00085	0.00079	0.00132	0.00132	0.00111	0.00178	0.00057
2126.33	0	0.00026	0.00036	0.00085	0.00086	0.00148	0.00148	0.0013	0.00193	0.00062
2124.91	0	0.00027	0.00036	0.00087	0.00096	0.00171	0.00171	0.00157	0.00212	0.00067
2123.48	0	0.00028	0.00039	0.0009	0.00111	0.00203	0.00203	0.00196	0.00234	0.00074
2122.05	2e-05	0.00031	0.00042	0.00094	0.00132	0.00247	0.00247	0.00249	0.0026	0.00082
2120.63	2e-05	0.00033	0.00045	0.00099	0.00158	0.00303	0.00303	0.00316	0.00286	0.00089
2119.2	4e-05	0.00036	0.00048	0.00105	0.00187	0.00367	0.00367	0.00393	0.00311	0.00096
2117.77	6e-05	0.00038	0.00051	0.0011	0.00217	0.00432	0.00432	0.0047	0.00333	0.00102
2116.35	8e-05	0.0004	0.00051	0.00115	0.00242	0.00486	0.00486	0.00535	0.0035	0.00107
2114.92	0.0001	0.00041	0.00054	0.00118	0.00258	0.00521	0.00521	0.00576	0.0036	0.00109
2113.49	0.0001	0.00041	0.00054	0.00119	0.00263	0.00531	0.00531	0.00587	0.00362	0.00109
2112.06	0.0001	0.0004	0.00051	0.00117	0.00255	0.00515	0.00515	0.00566	0.00357	0.00107
2110.64	8e-05	0.00038	0.00051	0.00114	0.00238	0.00478	0.00478	0.00519	0.00344	0.00103
2109.21	6e-05	0.00036	0.00048	0.0011	0.00214	0.00427	0.00427	0.00455	0.00326	0.00097
2107.78	4e-05	0.00034	0.00045	0.00105	0.00187	0.00369	0.00369	0.00383	0.00303	0.0009
2106.36	2e-05	0.00032	0.00042	0.001	0.0016	0.00311	0.00311	0.00314	0.00278	0.00083
2104.93	2e-05	0.00029	0.00039	0.00096	0.00136	0.00259	0.00259	0.00254	0.00253	0.00076
2103.5	0	0.00027	0.00036	0.00092	0.00116	0.00215	0.00215	0.00205	0.0023	0.0007
2102.07	0	0.00025	0.00033	0.00088	0.00101	0.00181	0.00181	0.00167	0.00211	0.00064
2100.65	0	0.00024	0.00033	0.00086	0.00089	0.00156	0.00156	0.00138	0.00195	0.0006
2099.22	0	0.00023	0.0003	0.00083	0.00081	0.00137	0.00137	0.00116	0.00182	0.00057
2097.79	0	0.00023	0.0003	0.00082	0.00075	0.00123	0.00123	0.00101	0.00173	0.00055
2096.37	0	0.00023	0.0003	0.00081	0.00072	0.00114	0.00114	0.0009	0.00166	0.00053
2094.94	0	0.00023	0.0003	0.00081	0.0007	0.00108	0.00108	0.00083	0.00162	0.00052
2093.51	0	0.00024	0.00033	0.00081	0.00069	0.00103	0.00103	0.00079	0.00159	0.00051
2092.09	0	0.00023	0.00033	0.00081	0.00067	0.001	0.001	0.00076	0.00156	0.00051
2090.66	0	0.00023	0.0003	0.0008	0.00065	0.00097	0.00097	0.00073	0.00155	0.0005
2089.23	0	0.00022	0.0003	0.00079	0.00064	0.00095	0.00095	0.00071	0.00154	0.0005
2087.8	0	0.00022	0.0003	0.00079	0.00063	0.00094	0.00094	0.0007	0.00153	0.0005
2086.38	0	0.00023	0.0003	0.00079	0.00062	0.00093	0.00093	0.00069	0.00153	0.0005
2084.95	0	0.00023	0.0003	0.00079	0.00062	0.00092	0.00092	0.00069	0.00153	0.0005
2083.52	0	0.00023	0.0003	0.00079	0.00062	0.00092	0.00092	0.00069	0.00154	0.0005
2082.1	0	0.00023	0.0003	0.0008	0.00062	0.00092	0.00092	0.00068	0.00154	0.00051
2080.67	0	0.00024	0.00033	0.00082	0.00064	0.00093	0.00093	0.00069	0.00155	0.00051
2079.24	0	0.00026	0.00036	0.00086	0.00067	0.00096	0.00096	0.00071	0.00155	0.00051
2077.81	0	0.00028	0.00042	0.0009	0.0007	0.00098	0.00098	0.00073	0.00155	0.00051
2076.39	0	0.00028	0.00042	0.0009	0.0007	0.00098	0.00098	0.00073	0.00155	0.00051
2074.96	0	0.00026	0.00039	0.00087	0.00067	0.00095	0.00095	0.00071	0.00155	0.00051
2073.53	0	0.00024	0.00033	0.00082	0.00064	0.00092	0.00092	0.00068	0.00155	0.00051
2072.11	0	0.00023	0.00033	0.0008	0.00062	0.00091	0.00091	0.00067	0.00155	0.00051
2070.68	0	0.00022	0.0003	0.00079	0.00062	0.00091	0.00091	0.00066	0.00154	0.00051
2069.25	0	0.00022	0.00033	0.00079	0.00062	0.00091	0.00091	0.00066	0.00154	0.00051
2067.82	0	0.00023	0.00033	0.0008	0.00063	0.00092	0.00092	0.00067	0.00153	0.00051
2066.4	0	0.00023	0.00033	0.00081	0.00064	0.00093	0.00093	0.00067	0.00153	0.00051
2064.97	0	0.00023	0.00033	0.00082	0.00064	0.00093	0.00093	0.00067	0.00153	0.00051
2063.54	0	0.00023	0.00033	0.00082	0.00064	0.00093	0.00093	0.00067	0.00153	0.00051
2062.12	0	0.00023	0.00033	0.00082	0.00063	0.00092	0.00092	0.00067	0.00153	0.00051
2060.69	0	0.00023	0.00033	0.00082	0.00063	0.00092	0.00092	0.00066	0.00152	0.00051
2059.26	0	0.00023	0.00033	0.00082	0.00063	0.00091	0.00091	0.00066	0.00152	0.00051
2057.84	0	0.00024	0.00033	0.00082	0.00063	0.00091	0.00091	0.00066	0.00152	0.0005
2056.41	0	0.00024	0.00033	0.00081	0.00063	0.00091	0.00091	0.00065	0.00151	0.0005
2054.98	0	0.00024	0.00033	0.00081	0.00062	0.00091	0.00091	0.00065	0.0015	0.0005
2053.55	0	0.00024	0.00033	0.00081	0.00062	0.0009	0.0009	0.00065	0.0015	0.0005
2052.13	0	0.00023	0.00033	0.00081	0.00061	0.00089	0.00089	0.00064	0.0015	0.0005
2050.7	0	0.00023	0.00033	0.00081	0.00061	0.00088	0.00088	0.00064	0.0015	0.0005
2049.27	0	0.00023	0.00033	0.00081	0.0006	0.00087	0.00087	0.00063	0.0015	0.00051
2047.85	0	0.00023	0.00033	0.0008	0.0006	0.00086	0.00086	0.00063	0.00151	0.00051
2046.42	0	0.00022	0.0003	0.00079	0.00059	0.00085	0.00085	0.00062	0.00152	0.00052
2044.99	0	0.00022	0.0003	0.00078	0.00059	0.00085	0.00085	0.00062	0.00152	0.00052
2043.56	0	0.00022	0.0003	0.00078	0.00059	0.00085	0.00085	0.00062	0.00153	0.00053
2042.14	0	0.00022	0.0003	0.00078	0.00059	0.00085	0.00085	0.00062	0.00154	0.00053
2040.71	0	0.00022	0.0003	0.00078	0.00059	0.00086	0.00086	0.00062	0.00154	0.00054
2039.28	0	0.00022	0.0003	0.00078	0.00059	0.00086	0.00086	0.00061	0.00155	0.00055
2037.86	0	0.00022	0.0003	0.00078	0.00059	0.00085	0.00085	0.00061	0.00155	0.00056
2036.43	0	0.00021	0.0003	0.00078	0.00058	0.00085	0.00085	0.00061	0.00156	0.00057
2035	0	0.00021	0.0003	0.00077	0.00058	0.00084	0.00084	0.00061	0.00157	0.00058
2033.58	0	0.00021	0.0003	0.00077	0.00057	0.00083	0.00083	0.00061	0.00158	0.00059
2032.15	0	0.00021	0.00027	0.00077	0.00057	0.00083	0.00083	0.0006	0.00158	0.0006
2030.72	0	0.00021	0.00027	0.00076	0.00057	0.00083	0.00083	0.0006	0.00159	0.0006
2029.29	0	0.00021	0.00027	0.00076	0.00056	0.00084	0.00084	0.0006	0.00159	0.00061
2027.87	0	0.00021	0.0003	0.00076	0.00056	0.00084	0.00084	0.0006	0.00159	0.00061
2026.44	0	0.00021	0.0003	0.00076	0.00056	0.00084	0.00084	0.0006	0.00159	0.00061
2025.01	0	0.0002	0.0003	0.00076	0.00056	0.00084	0.00084	0.0006	0.00159	0.0006
2023.59	0	0.0002	0.0003	0.00076	0.00056	0.00084	0.00084	0.0006	0.00159	0.0006
2022.16	0	0.0002	0.00027	0.00076	0.00056	0.00084	0.00084	0.0006	0.00158	0.00059
2020.73	0	0.00021	0.00027	0.00076	0.00056	0.00083	0.00083	0.0006	0.00157	0.00058
2019.3	0	0.00021	0.00027	0.00077	0.00057	0.00083	0.00083	0.0006	0.00156	0.00056
2017.88	0	0.00021	0.0003	0.00077	0.00057	0.00084	0.00084	0.0006	0.00155	0.00055
2016.45	0	0.00021	0.0003	0.00077	0.00057	0.00084	0.00084	0.0006	0.00154	0.00054
2015.02	0	0.00021	0.0003	0.00077	0.00057	0.00084	0.00084	0.00059	0.00152	0.00053
2013.6	0	0.00021	0.0003	0.00077	0.00056	0.00084	0.00084	0.00059	0.00151	0.00052
2012.17	0	0.0002	0.00027	0.00076	0.00056	0.00084	0.00084	0.00059	0.0015	0.00051
2010.74	0	0.0002	0.00027	0.00076	0.00056	0.00083	0.00083	0.00059	0.00149	0.0005
2009.31	0	0.0002	0.00027	0.00076	0.00056	0.00083	0.00083	0.00058	0.00147	0.0005
2007.89	0	0.0002	0.00027	0.00076	0.00056	0.00082	0.00082	0.00058	0.00146	0.00049
2006.46	0	0.0002	0.00027	0.00076	0.00055	0.00082	0.00082	0.00058	0.00145	0.00048
2005.03	0	0.0002	0.00027	0.00075	0.00055	0.00082	0.00082	0.00057	0.00143	0.00048
2003.61	0	0.0002	0.00027	0.00075	0.00055	0.00081	0.00081	0.00056	0.00143	0.00047
2002.18	0	0.0002	0.00027	0.00074	0.00055	0.0008	0.0008	0.00056	0.00142	0.00047
2000.75	0	0.0002	0.00027	0.00074	0.00055	0.00079	0.00079	0.00055	0.00142	0.00047
1999.33	0	0.0002	0.00027	0.00074	0.00054	0.00079	0.00079	0.00055	0.00142	0.00048
1997.9	0	0.0002	0.00027	0.00074	0.00054	0.00079	0.00079	0.00055	0.00142	0.00048
1996.47	0	0.0002	0.00027	0.00074	0.00054	0.00079	0.00079	0.00055	0.00143	0.00049
1995.04	0	0.0002	0.00027	0.00075	0.00054	0.0008	0.0008	0.00055	0.00143	0.00049
1993.62	0	0.00021	0.0003	0.00076	0.00055	0.00081	0.00081	0.00056	0.00143	0.00049
1992.19	0	0.00021	0.0003	0.00077	0.00056	0.00082	0.00082	0.00056	0.00144	0.0005
1990.76	0	0.00022	0.0003	0.00078	0.00056	0.00083	0.00083	0.00056	0.00144	0.0005
1989.34	0	0.00022	0.0003	0.00079	0.00057	0.00083	0.00083	0.00056	0.00144	0.0005
1987.91	0	0.00022	0.0003	0.00079	0.00057	0.00083	0.00083	0.00056	0.00144	0.0005
1986.48	0	0.00022	0.0003	0.00079	0.00057	0.00082	0.00082	0.00055	0.00144	0.0005
1985.05	0	0.00021	0.0003	0.00078	0.00057	0.00082	0.00082	0.00055	0.00144	0.00049
1983.63	0	0.00021	0.0003	0.00077	0.00056	0.00082	0.00082	0.00055	0.00144	0.00049
1982.2	0	0.00021	0.00027	0.00076	0.00056	0.00081	0.00081	0.00055	0.00144	0.00048
1980.77	0	0.00021	0.00027	0.00076	0.00056	0.00081	0.00081	0.00055	0.00143	0.00048
1979.35	0	0.00021	0.00027	0.00076	0.00056	0.00081	0.00081	0.00054	0.00143	0.00048
1977.92	0	0.00021	0.00027	0.00076	0.00056	0.00081	0.00081	0.00054	0.00144	0.00048
1976.49	0	0.00021	0.00027	0.00076	0.00056	0.0008	0.0008	0.00054	0.00144	0.00048
1975.07	0	0.00021	0.00027	0.00076	0.00056	0.0008	0.0008	0.00054	0.00145	0.00048
1973.64	0	0.00021	0.00027	0.00076	0.00056	0.0008	0.0008	0.00054	0.00147	0.00049
1972.21	0	0.00021	0.00027	0.00076	0.00055	0.0008	0.0008	0.00054	0.00147	0.00049
1970.78	0	0.0002	0.00027	0.00076	0.00055	0.0008	0.0008	0.00054	0.00148	0.0005
1969.36	0	0.0002	0.00027	0.00076	0.00055	0.0008	0.0008	0.00055	0.00148	0.0005
1967.93	0	0.00021	0.00027	0.00076	0.00055	0.0008	0.0008	0.00055	0.00149	0.0005
1966.5	0	0.00021	0.00027	0.00076	0.00055	0.0008	0.0008	0.00054	0.00149	0.0005
1965.08	0	0.0002	0.00027	0.00075	0.00055	0.00079	0.00079	0.00053	0.00149	0.0005
1963.65	0	0.0002	0.00027	0.00074	0.00054	0.00078	0.00078	0.00053	0.00149	0.0005
1962.22	0	0.0002	0.00027	0.00074	0.00054	0.00078	0.00078	0.00052	0.00148	0.00049
1960.79	0	0.0002	0.00027	0.00074	0.00054	0.00077	0.00077	0.00052	0.00148	0.00049
1959.37	0	0.0002	0.00027	0.00074	0.00054	0.00077	0.00077	0.00052	0.00147	0.00049
1957.94	0	0.0002	0.00027	0.00074	0.00054	0.00077	0.00077	0.00052	0.00146	0.00048
1956.51	0	0.0002	0.00027	0.00074	0.00054	0.00076	0.00076	0.00052	0.00146	0.00048
1955.09	0	0.0002	0.00027	0.00073	0.00054	0.00076	0.00076	0.00052	0.00145	0.00048
1953.66	0	0.0002	0.00027	0.00073	0.00054	0.00077	0.00077	0.00052	0.00145	0.00048
1952.23	0	0.0002	0.00024	0.00073	0.00054	0.00077	0.00077	0.00052	0.00146	0.00049
1950.81	0	0.0002	0.00024	0.00073	0.00054	0.00076	0.00076	0.00052	0.00146	0.0005
1949.38	0	0.0002	0.00024	0.00073	0.00054	0.00076	0.00076	0.00051	0.00147	0.00051
1947.95	0	0.0002	0.00024	0.00073	0.00054	0.00076	0.00076	0.00051	0.00148	0.00052
1946.52	0	0.0002	0.00027	0.00073	0.00055	0.00076	0.00076	0.00051	0.00148	0.00052
1945.1	0	0.0002	0.00027	0.00073	0.00055	0.00076	0.00076	0.00051	0.00148	0.00052
1943.67	2e-05	0.0002	0.00027	0.00073	0.00055	0.00076	0.00076	0.00051	0.00147	0.00052
1942.24	2e-05	0.0002	0.00027	0.00073	0.00055	0.00076	0.00076	0.0005	0.00146	0.00052
1940.82	0	0.0002	0.00027	0.00073	0.00055	0.00075	0.00075	0.0005	0.00145	0.00052
1939.39	0	0.0002	0.00027	0.00073	0.00055	0.00075	0.00075	0.0005	0.00143	0.00051
1937.96	0	0.0002	0.00027	0.00073	0.00055	0.00075	0.00075	0.0005	0.00142	0.00051
1936.53	0	0.0002	0.00027	0.00073	0.00055	0.00075	0.00075	0.0005	0.0014	0.0005
1935.11	0	0.0002	0.00027	0.00073	0.00056	0.00075	0.00075	0.00049	0.00138	0.00049
1933.68	0	0.00021	0.00027	0.00073	0.00056	0.00075	0.00075	0.00049	0.00136	0.00048
1932.25	0	0.00021	0.00027	0.00073	0.00056	0.00074	0.00074	0.00049	0.00135	0.00047
1930.83	0	0.00021	0.00027	0.00073	0.00056	0.00074	0.00074	0.00049	0.00135	0.00047
1929.4	0	0.00021	0.00027	0.00072	0.00056	0.00074	0.00074	0.00049	0.00136	0.00048
1927.97	0	0.00021	0.00027	0.00072	0.00055	0.00074	0.00074	0.00048	0.00138	0.00049
1926.54	0	0.0002	0.00027	0.00072	0.00055	0.00074	0.00074	0.00048	0.0014	0.00051
1925.12	0	0.0002	0.00027	0.00072	0.00055	0.00074	0.00074	0.00048	0.00142	0.00052
1923.69	0	0.0002	0.00027	0.00072	0.00055	0.00074	0.00074	0.00048	0.00143	0.00052
1922.26	0	0.0002	0.00027	0.00072	0.00055	0.00073	0.00073	0.00048	0.00144	0.00053
1920.84	0	0.0002	0.00027	0.00072	0.00055	0.00073	0.00073	0.00047	0.00145	0.00053
1919.41	0	0.0002	0.00027	0.00072	0.00055	0.00073	0.00073	0.00047	0.00145	0.00053
1917.98	0	0.0002	0.00027	0.00072	0.00055	0.00073	0.00073	0.00047	0.00146	0.00053
1916.56	0	0.0002	0.00027	0.00072	0.00056	0.00073	0.00073	0.00047	0.00146	0.00053
1915.13	0	0.0002	0.00027	0.00072	0.00056	0.00073	0.00073	0.00046	0.00145	0.00053
1913.7	0	0.0002	0.00027	0.00072	0.00056	0.00072	0.00072	0.00046	0.00144	0.00052
1912.27	0	0.0002	0.00027	0.00072	0.00056	0.00072	0.00072	0.00046	0.00143	0.00051
1910.85	0	0.0002	0.00027	0.00072	0.00056	0.00072	0.00072	0.00046	0.00141	0.0005
1909.42	0	0.0002	0.00027	0.00072	0.00056	0.00072	0.00072	0.00046	0.0014	0.00049
1907.99	0	0.0002	0.00027	0.00072	0.00055	0.00072	0.00072	0.00045	0.00138	0.00048
1906.57	0	0.00019	0.00027	0.00072	0.00055	0.00072	0.00072	0.00045	0.00136	0.00047
1905.14	0	0.00019	0.00024	0.00072	0.00054	0.00072	0.00072	0.00045	0.00135	0.00046
1903.71	0	0.00019	0.00024	0.00072	0.00055	0.00071	0.00071	0.00045	0.00133	0.00045
1902.28	0	0.00019	0.00024	0.00072	0.00055	0.00071	0.00071	0.00045	0.00132	0.00044
1900.86	0	0.00019	0.00024	0.00071	0.00055	0.00071	0.00071	0.00044	0.0013	0.00043
1899.43	0	0.00019	0.00024	0.00071	0.00055	0.00071	0.00071	0.00044	0.00128	0.00042
1898	0	0.0002	0.00024	0.00071	0.00055	0.00071	0.00071	0.00044	0.00126	0.00042
1896.58	0	0.0002	0.00024	0.00071	0.00055	0.00071	0.00071	0.00044	0.00125	0.00042
1895.15	0	0.0002	0.00024	0.00071	0.00054	0.00071	0.00071	0.00044	0.00125	0.00042
1893.72	0	0.0002	0.00024	0.00071	0.00054	0.0007	0.0007	0.00043	0.00124	0.00042
1892.3	0	0.00019	0.00024	0.00071	0.00054	0.0007	0.0007	0.00043	0.00122	0.00042
1890.87	0	0.00019	0.00024	0.00071	0.00054	0.0007	0.0007	0.00043	0.00121	0.00041
1889.44	0	0.00019	0.00024	0.00071	0.00054	0.0007	0.0007	0.00043	0.00119	0.00041
1888.01	0	0.00019	0.00024	0.00071	0.00053	0.0007	0.0007	0.00043	0.00117	0.0004
1886.59	0	0.00019	0.00024	0.00071	0.00053	0.0007	0.0007	0.00042	0.00114	0.00039
1885.16	0	0.00019	0.00024	0.00071	0.00053	0.00069	0.00069	0.00042	0.00112	0.00038
1883.73	0	0.00019	0.00024	0.00071	0.00053	0.00069	0.00069	0.00042	0.00109	0.00037
1882.31	0	0.00018	0.00024	0.00071	0.00053	0.00069	0.00069	0.00042	0.00107	0.00036
1880.88	0	0.00018	0.00024	0.00071	0.00053	0.00069	0.00069	0.00042	0.00104	0.00034
1879.45	0	0.00018	0.00024	0.00071	0.00053	0.00069	0.00069	0.00041	0.00102	0.00033
1878.02	0	0.00018	0.00024	0.00071	0.00053	0.00069	0.00069	0.00041	0.00101	0.00033
1876.6	0	0.00018	0.00024	0.00071	0.00053	0.00069	0.00069	0.00041	0.00102	0.00034
1875.17	2e-05	0.00018	0.00024	0.00071	0.00053	0.00068	0.00068	0.00041	0.00104	0.00035
1873.74	2e-05	0.00018	0.00024	0.00071	0.00052	0.00068	0.00068	0.0004	0.00105	0.00037
1872.32	2e-05	0.00018	0.00024	0.00071	0.00052	0.00068	0.00068	0.0004	0.00106	0.00038
1870.89	2e-05	0.00018	0.00024	0.0007	0.00053	0.00068	0.00068	0.0004	0.00107	0.00038
1869.46	2e-05	0.00019	0.00024	0.0007	0.00053	0.00068	0.00068	0.0004	0.00107	0.00039
1868.03	2e-05	0.00019	0.00024	0.0007	0.00053	0.00068	0.00068	0.0004	0.00107	0.00039
1866.61	2e-05	0.00019	0.00024	0.0007	0.00053	0.00067	0.00067	0.00039	0.00106	0.00039
1865.18	2e-05	0.00018	0.00024	0.0007	0.00053	0.00067	0.00067	0.00039	0.00105	0.00038
1863.75	2e-05	0.00018	0.00021	0.0007	0.00052	0.00067	0.00067	0.00039	0.00103	0.00037
1862.33	2e-05	0.00018	0.00021	0.0007	0.00052	0.00067	0.00067	0.00039	0.001	0.00035
1860.9	2e-05	0.00018	0.00021	0.0007	0.00052	0.00067	0.00067	0.00039	0.00096	0.00033
1859.47	2e-05	0.00017	0.00021	0.0007	0.00051	0.00067	0.00067	0.00038	0.00093	0.00031
1858.05	2e-05	0.00017	0.00021	0.0007	0.00051	0.00067	0.00067	0.00038	0.00089	0.00029
1856.62	2e-05	0.00017	0.00021	0.0007	0.0005	0.00066	0.00066	0.00038	0.00087	0.00028
1855.19	2e-05	0.00017	0.00021	0.0007	0.0005	0.00066	0.00066	0.00038	0.00087	0.00027
1853.76	2e-05	0.00017	0.00021	0.0007	0.0005	0.00066	0.00066	0.00038	0.00088	0.00028
1852.34	2e-05	0.00017	0.00021	0.0007	0.0005	0.00066	0.00066	0.00037	0.0009	0.0003
1850.91	2e-05	0.00017	0.00021	0.0007	0.00051	0.00066	0.00066	0.00037	0.00091	0.00031
1849.48	2e-05	0.00018	0.00021	0.0007	0.00051	0.00066	0.00066	0.00037	0.00093	0.00032
1848.06	2e-05	0.00018	0.00021	0.0007	0.00052	0.00065	0.00065	0.00037	0.00094	0.00033
1846.63	2e-05	0.00018	0.00021	0.0007	0.00053	0.00065	0.00065	0.00037	0.00095	0.00034
1845.2	2e-05	0.00018	0.00021	0.0007	0.00053	0.00065	0.00065	0.00036	0.00095	0.00034
1843.77	2e-05	0.00018	0.00021	0.0007	0.00053	0.00065	0.00065	0.00036	0.00095	0.00034
1842.35	2e-05	0.00018	0.00021	0.00069	0.00052	0.00065	0.00065	0.00036	0.00094	0.00034
1840.92	2e-05	0.00018	0.00021	0.00069	0.00051	0.00065	0.00065	0.00036	0.00092	0.00033
1839.49	2e-05	0.00018	0.00021	0.00069	0.00051	0.00065	0.00065	0.00036	0.00091	0.00032
1838.07	2e-05	0.00017	0.00021	0.00069	0.0005	0.00064	0.00064	0.00035	0.0009	0.00032
1836.64	2e-05	0.00017	0.00021	0.00069	0.0005	0.00064	0.00064	0.00035	0.0009	0.00032
1835.21	2e-05	0.00017	0.00021	0.00069	0.0005	0.00064	0.00064	0.00035	0.0009	0.00032
1833.79	2e-05	0.00017	0.00021	0.00069	0.00051	0.00064	0.00064	0.00035	0.0009	0.00032
1832.36	2e-05	0.00018	0.00021	0.00069	0.00051	0.00064	0.00064	0.00034	0.00091	0.00033
1830.93	2e-05	0.00018	0.00024	0.00069	0.00051	0.00064	0.00064	0.00034	0.00092	0.00034
1829.5	2e-05	0.00018	0.00024	0.00069	0.00051	0.00063	0.00063	0.00034	0.00093	0.00035
1828.08	2e-05	0.00018	0.00024	0.00069	0.00051	0.00063	0.00063	0.00034	0.00093	0.00035
1826.65	2e-05	0.00018	0.00024	0.00069	0.00052	0.00063	0.00063	0.00034	0.00092	0.00035
1825.22	2e-05	0.00018	0.00021	0.00069	0.00053	0.00063	0.00063	0.00033	0.00091	0.00034
1823.8	2e-05	0.00018	0.00021	0.00069	0.00052	0.00063	0.00063	0.00033	0.00089	0.00033
1822.37	2e-05	0.00017	0.00021	0.00069	0.00052	0.00063	0.00063	0.00033	0.00087	0.00031
1820.94	2e-05	0.00017	0.00021	0.00069	0.00051	0.00063	0.00063	0.00033	0.00084	0.0003
1819.51	2e-05	0.00018	0.00021	0.00069	0.00051	0.00062	0.00062	0.00033	0.00082	0.00028
1818.09	2e-05	0.00018	0.00021	0.00069	0.00052	0.00062	0.00062	0.00032	0.00081	0.00027
1816.66	2e-05	0.00018	0.00021	0.00069	0.00052	0.00062	0.00062	0.00032	0.00081	0.00027
1815.23	2e-05	0.00018	0.00021	0.00068	0.00052	0.00062	0.00062	0.00032	0.00081	0.00027
1813.81	2e-05	0.00018	0.00021	0.00069	0.00052	0.00062	0.00062	0.00032	0.00081	0.00027
1812.38	2e-05	0.00018	0.00021	0.00069	0.00052	0.00062	0.00062	0.00032	0.00081	0.00027
1810.95	2e-05	0.00018	0.00021	0.0007	0.00052	0.00063	0.00063	0.00032	0.00081	0.00028
1809.53	2e-05	0.00018	0.00021	0.0007	0.00052	0.00062	0.00062	0.00032	0.00082	0.00028
1808.1	2e-05	0.00018	0.00021	0.00069	0.00052	0.00062	0.00062	0.00032	0.00082	0.00029
1806.67	2e-05	0.00018	0.00021	0.00069	0.00052	0.00061	0.00061	0.00031	0.00083	0.00029
1805.24	2e-05	0.00018	0.00021	0.00069	0.00052	0.00061	0.00061	0.00031	0.00083	0.0003
1803.82	2e-05	0.00018	0.00021	0.0007	0.00053	0.00062	0.00062	0.00031	0.00083	0.0003
1802.39	2e-05	0.00019	0.00021	0.00071	0.00053	0.00063	0.00063	0.00032	0.00084	0.0003
1800.96	2e-05	0.00019	0.00021	0.00071	0.00053	0.00063	0.00063	0.00032	0.00085	0.00031
1799.54	2e-05	0.00019	0.00024	0.00071	0.00053	0.00063	0.00063	0.00032	0.00086	0.00033
1798.11	2e-05	0.00019	0.00024	0.00071	0.00053	0.00062	0.00062	0.00032	0.00087	0.00034
1796.68	2e-05	0.00019	0.00024	0.00071	0.00052	0.00062	0.00062	0.00032	0.00088	0.00035
1795.25	2e-05	0.00019	0.00024	0.00071	0.00052	0.00062	0.00062	0.00032	0.00088	0.00035
1793.83	4e-05	0.00019	0.00024	0.00073	0.00053	0.00063	0.00063	0.00032	0.00087	0.00035
1792.4	4e-05	0.00019	0.00024	0.00074	0.00053	0.00064	0.00064	0.00033	0.00085	0.00034
1790.97	4e-05	0.00019	0.00024	0.00073	0.00053	0.00064	0.00064	0.00032	0.00083	0.00033
1789.55	2e-05	0.00019	0.00024	0.00072	0.00053	0.00063	0.00063	0.00031	0.00082	0.00032
1788.12	2e-05	0.00018	0.00024	0.0007	0.00053	0.00061	0.00061	0.0003	0.0008	0.00031
1786.69	2e-05	0.00019	0.00024	0.0007	0.00053	0.00061	0.00061	0.00029	0.00079	0.0003
1785.26	2e-05	0.00019	0.00024	0.0007	0.00053	0.00061	0.00061	0.00029	0.00077	0.00028
1783.84	2e-05	0.00019	0.00024	0.00071	0.00053	0.00061	0.00061	0.00029	0.00075	0.00027
1782.41	2e-05	0.00019	0.00024	0.00071	0.00053	0.00061	0.00061	0.00029	0.00074	0.00027
1780.98	2e-05	0.00019	0.00024	0.00071	0.00054	0.00061	0.00061	0.00029	0.00075	0.00028
1779.56	2e-05	0.00019	0.00024	0.00072	0.00055	0.00062	0.00062	0.00029	0.00078	0.0003
1778.13	2e-05	0.00019	0.00024	0.00072	0.00056	0.00062	0.00062	0.00029	0.00081	0.00032
1776.7	2e-05	0.00019	0.00024	0.00073	0.00055	0.00061	0.00061	0.00029	0.00084	0.00035
1775.28	2e-05	0.00019	0.00024	0.00073	0.00055	0.00062	0.00062	0.0003	0.00086	0.00036
1773.85	4e-05	0.0002	0.00024	0.00075	0.00054	0.00063	0.00063	0.0003	0.00086	0.00037
1772.42	4e-05	0.0002	0.00027	0.00076	0.00054	0.00064	0.00064	0.00031	0.00086	0.00037
1770.99	4e-05	0.00021	0.00027	0.00077	0.00055	0.00065	0.00065	0.00031	0.00085	0.00036
1769.57	4e-05	0.00021	0.00027	0.00076	0.00056	0.00064	0.00064	0.0003	0.00084	0.00036
1768.14	4e-05	0.00021	0.00027	0.00074	0.00056	0.00063	0.00063	0.0003	0.00083	0.00035
1766.71	4e-05	0.0002	0.00027	0.00073	0.00056	0.00062	0.00062	0.00029	0.00081	0.00034
1765.29	2e-05	0.0002	0.00027	0.00072	0.00055	0.00061	0.00061	0.00028	0.00079	0.00033
1763.86	2e-05	0.0002	0.00027	0.00073	0.00055	0.00061	0.00061	0.00028	0.00076	0.00031
1762.43	4e-05	0.0002	0.00027	0.00074	0.00055	0.00061	0.00061	0.00028	0.00073	0.00028
1761	4e-05	0.0002	0.00027	0.00074	0.00056	0.00062	0.00062	0.00028	0.0007	0.00027
1759.58	4e-05	0.00021	0.00027	0.00074	0.00056	0.00061	0.00061	0.00028	0.0007	0.00027
1758.15	4e-05	0.00021	0.00027	0.00074	0.00056	0.00061	0.00061	0.00028	0.00071	0.00028
1756.72	4e-05	0.0002	0.00027	0.00074	0.00055	0.0006	0.0006	0.00028	0.00074	0.0003
1755.3	4e-05	0.0002	0.00027	0.00073	0.00055	0.0006	0.0006	0.00028	0.00076	0.00033
1753.87	4e-05	0.0002	0.00027	0.00073	0.00055	0.0006	0.0006	0.00027	0.00079	0.00035
1752.44	4e-05	0.0002	0.00027	0.00075	0.00055	0.00062	0.00062	0.00028	0.0008	0.00036
1751.02	4e-05	0.00021	0.00027	0.00077	0.00055	0.00064	0.00064	0.00028	0.00082	0.00038
1749.59	6e-05	0.00021	0.00027	0.00078	0.00056	0.00065	0.00065	0.00029	0.00083	0.00039
1748.16	6e-05	0.00021	0.00027	0.00078	0.00056	0.00065	0.00065	0.00029	0.00084	0.0004
1746.73	4e-05	0.00021	0.00027	0.00077	0.00056	0.00064	0.00064	0.00029	0.00084	0.0004
1745.31	4e-05	0.00022	0.00027	0.00077	0.00055	0.00063	0.00063	0.00028	0.00084	0.0004
1743.88	4e-05	0.00022	0.00027	0.00076	0.00055	0.00063	0.00063	0.00028	0.00084	0.0004
1742.45	4e-05	0.00021	0.00027	0.00076	0.00055	0.00063	0.00063	0.00027	0.00083	0.0004
1741.03	4e-05	0.00021	0.00027	0.00076	0.00056	0.00062	0.00062	0.00027	0.00083	0.0004
1739.6	4e-05	0.00021	0.00027	0.00076	0.00056	0.00062	0.00062	0.00027	0.00082	0.0004
1738.17	4e-05	0.00021	0.00027	0.00076	0.00056	0.00062	0.00062	0.00027	0.00081	0.00039
1736.74	4e-05	0.00021	0.0003	0.00077	0.00056	0.00062	0.00062	0.00027	0.0008	0.00039
1735.32	4e-05	0.00021	0.0003	0.00079	0.00056	0.00063	0.00063	0.00027	0.00079	0.00039
1733.89	6e-05	0.00021	0.0003	0.00081	0.00056	0.00064	0.00064	0.00028	0.00077	0.00039
1732.46	6e-05	0.00021	0.0003	0.00081	0.00056	0.00064	0.00064	0.00028	0.00075	0.00037
1731.04	4e-05	0.00021	0.0003	0.00079	0.00056	0.00063	0.00063	0.00027	0.00071	0.00035
1729.61	4e-05	0.00021	0.0003	0.00078	0.00056	0.00061	0.00061	0.00026	0.00067	0.00032
1728.18	4e-05	0.00021	0.0003	0.00076	0.00056	0.00059	0.00059	0.00025	0.00064	0.0003
1726.76	4e-05	0.00021	0.00027	0.00075	0.00056	0.00058	0.00058	0.00025	0.00062	0.00028
1725.33	4e-05	0.00021	0.00027	0.00075	0.00056	0.00058	0.00058	0.00024	0.00061	0.00028
1723.9	4e-05	0.00021	0.0003	0.00075	0.00056	0.00059	0.00059	0.00024	0.00061	0.00029
1722.47	4e-05	0.00022	0.0003	0.00076	0.00057	0.00059	0.00059	0.00024	0.00062	0.0003
1721.05	4e-05	0.00022	0.0003	0.00077	0.00058	0.0006	0.0006	0.00025	0.00064	0.00032
1719.62	4e-05	0.00023	0.00033	0.0008	0.00059	0.00062	0.00062	0.00025	0.00067	0.00034
1718.19	6e-05	0.00024	0.00033	0.00084	0.0006	0.00065	0.00065	0.00027	0.00068	0.00036
1716.77	6e-05	0.00025	0.00033	0.00087	0.00061	0.00067	0.00067	0.00028	0.00069	0.00037
1715.34	6e-05	0.00025	0.00036	0.00088	0.00062	0.00068	0.00068	0.00028	0.0007	0.00037
1713.91	4e-05	0.00025	0.00036	0.00086	0.00061	0.00066	0.00066	0.00027	0.0007	0.00037
1712.48	4e-05	0.00024	0.00033	0.00084	0.00061	0.00065	0.00065	0.00026	0.00069	0.00036
1711.06	4e-05	0.00024	0.00033	0.00082	0.00061	0.00064	0.00064	0.00025	0.00067	0.00035
1709.63	4e-05	0.00024	0.00033	0.00082	0.00061	0.00064	0.00064	0.00025	0.00066	0.00034
1708.2	4e-05	0.00025	0.00033	0.00083	0.00061	0.00065	0.00065	0.00026	0.00065	0.00034
1706.78	4e-05	0.00025	0.00036	0.00085	0.00062	0.00066	0.00066	0.00026	0.00066	0.00035
1705.35	4e-05	0.00026	0.00036	0.00087	0.00063	0.00067	0.00067	0.00027	0.00069	0.00038
1703.92	4e-05	0.00026	0.00039	0.00089	0.00065	0.00068	0.00068	0.00027	0.00073	0.00042
1702.49	4e-05	0.00027	0.00039	0.00091	0.00066	0.0007	0.0007	0.00028	0.00076	0.00046
1701.07	6e-05	0.00027	0.00039	0.00094	0.00067	0.00072	0.00072	0.00028	0.00078	0.00048
1699.64	6e-05	0.00027	0.00042	0.00096	0.00068	0.00074	0.00074	0.00029	0.00078	0.00049
1698.21	6e-05	0.00027	0.00042	0.00097	0.00068	0.00075	0.00075	0.0003	0.00077	0.00048
1696.79	6e-05	0.00027	0.00045	0.00095	0.00068	0.00074	0.00074	0.00029	0.00074	0.00045
1695.36	6e-05	0.00027	0.00045	0.00093	0.00068	0.00072	0.00072	0.00028	0.0007	0.00042
1693.93	4e-05	0.00028	0.00042	0.00091	0.00068	0.00069	0.00069	0.00027	0.00068	0.0004
1692.51	4e-05	0.00028	0.00042	0.0009	0.00068	0.00068	0.00068	0.00026	0.00067	0.00039
1691.08	2e-05	0.00029	0.00042	0.0009	0.00069	0.00068	0.00068	0.00026	0.00066	0.00039
1689.65	4e-05	0.0003	0.00042	0.00092	0.0007	0.00069	0.00069	0.00026	0.00065	0.00038
1688.22	4e-05	0.0003	0.00045	0.00094	0.00072	0.00071	0.00071	0.00027	0.00065	0.00038
1686.8	4e-05	0.00031	0.00045	0.00097	0.00073	0.00074	0.00074	0.00028	0.00065	0.00039
1685.37	4e-05	0.00031	0.00048	0.00101	0.00075	0.00078	0.00078	0.00029	0.00066	0.0004
1683.94	6e-05	0.00032	0.00048	0.00105	0.00076	0.00081	0.00081	0.0003	0.00067	0.00041
1682.52	4e-05	0.00032	0.00051	0.00105	0.00077	0.00081	0.00081	0.0003	0.00068	0.00042
1681.09	4e-05	0.00033	0.00051	0.00103	0.00077	0.00078	0.00078	0.00029	0.00068	0.00042
1679.66	2e-05	0.00034	0.00051	0.00102	0.00077	0.00077	0.00077	0.00029	0.00067	0.00042
1678.23	2e-05	0.00034	0.00054	0.00102	0.00078	0.00076	0.00076	0.00028	0.00066	0.00042
1676.81	2e-05	0.00035	0.00051	0.00103	0.00078	0.00076	0.00076	0.00029	0.00064	0.00041
1675.38	2e-05	0.00035	0.00054	0.00105	0.00079	0.00077	0.00077	0.00029	0.00062	0.00039
1673.95	2e-05	0.00036	0.00054	0.00107	0.00081	0.00079	0.00079	0.0003	0.00059	0.00037
1672.53	4e-05	0.00036	0.00057	0.00109	0.00082	0.0008	0.0008	0.00031	0.00058	0.00036
1671.1	4e-05	0.00037	0.0006	0.00111	0.00084	0.00082	0.00082	0.00032	0.00058	0.00036
1669.67	4e-05	0.00039	0.00063	0.00114	0.00086	0.00085	0.00085	0.00033	0.00058	0.00037
1668.25	2e-05	0.0004	0.00063	0.00114	0.00087	0.00085	0.00085	0.00033	0.00058	0.00037
1666.82	2e-05	0.0004	0.00063	0.00113	0.00088	0.00084	0.00084	0.00032	0.00056	0.00035
1665.39	2e-05	0.00041	0.00063	0.00113	0.00089	0.00083	0.00083	0.00031	0.00053	0.00033
1663.96	2e-05	0.00042	0.00066	0.00115	0.0009	0.00084	0.00084	0.00032	0.0005	0.0003
1662.54	2e-05	0.00043	0.00069	0.00118	0.00092	0.00087	0.00087	0.00033	0.0005	0.0003
1661.11	2e-05	0.00045	0.00072	0.00121	0.00095	0.0009	0.0009	0.00035	0.00051	0.00032
1659.68	0	0.00046	0.00075	0.00124	0.00097	0.00093	0.00093	0.00036	0.00053	0.00034
1658.26	0	0.00048	0.00078	0.00127	0.001	0.00095	0.00095	0.00037	0.00056	0.00037
1656.83	2e-05	0.0005	0.00078	0.00131	0.00103	0.00099	0.00099	0.00039	0.00061	0.00041
1655.4	2e-05	0.00052	0.00084	0.00138	0.00106	0.00105	0.00105	0.00041	0.00067	0.00047
1653.97	2e-05	0.00056	0.0009	0.00149	0.00111	0.00114	0.00114	0.00045	0.00073	0.00053
1652.55	2e-05	0.00061	0.00096	0.0016	0.00118	0.00124	0.00124	0.00049	0.00078	0.00057
1651.12	2e-05	0.00063	0.00105	0.00164	0.00122	0.00127	0.00127	0.00052	0.00081	0.00059
1649.69	0	0.00065	0.00108	0.00165	0.00126	0.00129	0.00129	0.00054	0.00082	0.0006
1648.27	0	0.00067	0.00111	0.00171	0.00131	0.00134	0.00134	0.00058	0.00082	0.00059
1646.84	0	0.00072	0.0012	0.00179	0.00139	0.00143	0.00143	0.00062	0.0008	0.00057
1645.41	0	0.00077	0.00129	0.00187	0.00148	0.0015	0.0015	0.00065	0.00079	0.00056
1643.98	0	0.00081	0.00138	0.0019	0.00155	0.00154	0.00154	0.00066	0.00079	0.00055
1642.56	0	0.00085	0.00147	0.00194	0.0016	0.00158	0.00158	0.00068	0.00078	0.00054
1641.13	0	0.00089	0.00153	0.002	0.00167	0.00163	0.00163	0.00072	0.00079	0.00054
1639.7	0	0.00094	0.00162	0.0021	0.00175	0.00172	0.00172	0.00077	0.0008	0.00055
1638.28	0	0.00101	0.00174	0.00223	0.00185	0.00184	0.00184	0.00084	0.00081	0.00055
1636.85	0	0.00109	0.00192	0.00241	0.00199	0.002	0.002	0.00093	0.00081	0.00055
1635.42	2e-05	0.0012	0.0021	0.0026	0.00215	0.00218	0.00218	0.00103	0.00083	0.00056
1634	4e-05	0.0013	0.00228	0.00273	0.00229	0.00231	0.00231	0.0011	0.00085	0.00058
1632.57	6e-05	0.00137	0.0024	0.00282	0.0024	0.00238	0.00238	0.00114	0.00089	0.0006
1631.14	8e-05	0.00143	0.00252	0.00291	0.0025	0.00246	0.00246	0.0012	0.00092	0.00062
1629.71	0.0001	0.00151	0.00264	0.00305	0.00263	0.00258	0.00258	0.00127	0.00093	0.00063
1628.29	0.0001	0.0016	0.00282	0.00322	0.00279	0.00274	0.00274	0.00136	0.00094	0.00062
1626.86	0.00014	0.0017	0.00303	0.00341	0.00295	0.00293	0.00293	0.00146	0.00094	0.00061
1625.43	0.00016	0.00181	0.00324	0.00361	0.00311	0.00311	0.00311	0.00155	0.00096	0.0006
1624.01	0.00018	0.00192	0.00342	0.00381	0.00328	0.00329	0.00329	0.00165	0.00098	0.00062
1622.58	0.00022	0.00204	0.00363	0.00399	0.00347	0.00346	0.00346	0.00175	0.00101	0.00064
1621.15	0.00026	0.00215	0.00381	0.00413	0.00364	0.00358	0.00358	0.00182	0.00103	0.00065
1619.72	0.0003	0.00222	0.00393	0.00422	0.00375	0.00366	0.00366	0.00188	0.00104	0.00064
1618.3	0.0003	0.00228	0.00402	0.00431	0.00384	0.00374	0.00374	0.00192	0.00102	0.00063
1616.87	0.00028	0.0023	0.00411	0.00437	0.00389	0.0038	0.0038	0.00194	0.00099	0.0006
1615.44	0.00028	0.00228	0.00408	0.00434	0.00388	0.00377	0.00377	0.00191	0.00095	0.00057
1614.02	0.00028	0.00223	0.00399	0.00423	0.00381	0.00366	0.00366	0.00184	0.0009	0.00053
1612.59	0.00028	0.00217	0.00384	0.00408	0.00371	0.00351	0.00351	0.00175	0.00085	0.0005
1611.16	0.00026	0.00208	0.00366	0.00392	0.00358	0.00335	0.00335	0.00165	0.00079	0.00046
1609.74	0.00022	0.00197	0.00342	0.00374	0.00342	0.00316	0.00316	0.00154	0.00074	0.00043
1608.31	0.00018	0.00184	0.00318	0.00354	0.00323	0.00295	0.00295	0.00142	0.00068	0.00039
1606.88	0.00014	0.0017	0.00291	0.00333	0.00303	0.00274	0.00274	0.00129	0.00062	0.00035
1605.45	0.00012	0.00158	0.0027	0.00312	0.00285	0.00253	0.00253	0.00117	0.00056	0.00032
1604.03	0.0001	0.00147	0.00249	0.00292	0.00268	0.00235	0.00235	0.00106	0.00052	0.0003
1602.6	6e-05	0.00137	0.00228	0.00273	0.00251	0.00219	0.00219	0.00097	0.00048	0.00028
1601.17	4e-05	0.00127	0.0021	0.00257	0.00236	0.00204	0.00204	0.00088	0.00044	0.00027
1599.75	4e-05	0.00119	0.00195	0.00243	0.00223	0.0019	0.0019	0.0008	0.0004	0.00025
1598.32	2e-05	0.00111	0.00183	0.00232	0.00213	0.00178	0.00178	0.00073	0.00037	0.00023
1596.89	2e-05	0.00104	0.00174	0.00223	0.00205	0.00168	0.00168	0.00067	0.00034	0.00021
1595.46	0	0.00099	0.00162	0.00215	0.00198	0.00159	0.00159	0.00062	0.00031	0.00019
1594.04	0	0.00095	0.00153	0.00208	0.00191	0.00152	0.00152	0.00057	0.00029	0.00018
1592.61	0	0.00091	0.00147	0.002	0.00185	0.00145	0.00145	0.00053	0.00027	0.00017
1591.18	0	0.00088	0.00141	0.00193	0.0018	0.00139	0.00139	0.0005	0.00025	0.00016
1589.76	0	0.00085	0.00135	0.00187	0.00177	0.00134	0.00134	0.00047	0.00023	0.00014
1588.33	0	0.00082	0.00132	0.00183	0.00174	0.0013	0.0013	0.00044	0.00021	0.00013
1586.9	0	0.0008	0.00129	0.00179	0.00173	0.00126	0.00126	0.00042	0.00019	0.00012
1585.48	0	0.00079	0.00126	0.00177	0.00171	0.00123	0.00123	0.00041	0.00018	0.00012
1584.05	0	0.00078	0.00123	0.00175	0.0017	0.00122	0.00122	0.0004	0.00018	0.00012
1582.62	0	0.00078	0.00123	0.00174	0.0017	0.0012	0.0012	0.00039	0.00018	0.00013
1581.19	0	0.00079	0.00123	0.00174	0.0017	0.00119	0.00119	0.00038	0.00018	0.00013
1579.77	2e-05	0.0008	0.00123	0.00175	0.0017	0.00119	0.00119	0.00038	0.00019	0.00014
1578.34	2e-05	0.00081	0.00126	0.00178	0.00171	0.00121	0.00121	0.00038	0.0002	0.00015
1576.91	4e-05	0.00082	0.00129	0.00184	0.00174	0.00124	0.00124	0.00039	0.00021	0.00017
1575.49	4e-05	0.00084	0.00132	0.00188	0.00179	0.00127	0.00127	0.00039	0.00022	0.00018
1574.06	4e-05	0.00085	0.00138	0.0019	0.00184	0.00127	0.00127	0.0004	0.00022	0.00018
1572.63	4e-05	0.00087	0.00141	0.0019	0.00188	0.00127	0.00127	0.0004	0.00022	0.00018
1571.2	4e-05	0.0009	0.00147	0.00193	0.00192	0.0013	0.0013	0.00041	0.00021	0.00017
1569.78	4e-05	0.00093	0.00153	0.00199	0.00198	0.00133	0.00133	0.00043	0.0002	0.00016
1568.35	4e-05	0.00097	0.00162	0.00203	0.00203	0.00136	0.00136	0.00043	0.0002	0.00017
1566.92	4e-05	0.001	0.00168	0.00205	0.00208	0.00136	0.00136	0.00043	0.00022	0.00019
1565.5	4e-05	0.00102	0.00171	0.00208	0.00212	0.00137	0.00137	0.00042	0.00023	0.00022
1564.07	4e-05	0.00105	0.00177	0.00212	0.00218	0.00138	0.00138	0.00042	0.00026	0.00025
1562.64	4e-05	0.00108	0.00183	0.00218	0.00223	0.0014	0.0014	0.00042	0.00028	0.00028
1561.21	6e-05	0.00112	0.00189	0.00229	0.0023	0.00144	0.00144	0.00044	0.00029	0.00029
1559.79	0.0001	0.00118	0.00195	0.00245	0.00239	0.00152	0.00152	0.00046	0.00029	0.0003
1558.36	0.00014	0.00126	0.00204	0.0026	0.0025	0.00158	0.00158	0.00046	0.00029	0.0003
1556.93	0.00012	0.00132	0.0021	0.00259	0.00257	0.00156	0.00156	0.00045	0.00028	0.00029
1555.51	8e-05	0.00133	0.00219	0.00252	0.00259	0.00152	0.00152	0.00043	0.00027	0.00028
1554.08	6e-05	0.00134	0.00225	0.00249	0.00262	0.00149	0.00149	0.00041	0.00025	0.00025
1552.65	6e-05	0.00136	0.00234	0.00249	0.00265	0.00146	0.00146	0.00041	0.00022	0.00022
1551.23	4e-05	0.00139	0.0024	0.00251	0.00269	0.00144	0.00144	0.0004	0.0002	0.00019
1549.8	4e-05	0.00142	0.00246	0.00253	0.00272	0.00142	0.00142	0.00038	0.00019	0.00019
1548.37	4e-05	0.00146	0.00255	0.00256	0.00276	0.00141	0.00141	0.00037	0.00019	0.00019
1546.94	6e-05	0.0015	0.00261	0.0026	0.00281	0.00142	0.00142	0.00037	0.00021	0.00021
1545.52	6e-05	0.00154	0.00267	0.00268	0.00287	0.00145	0.00145	0.00037	0.00023	0.00025
1544.09	8e-05	0.00158	0.00276	0.00279	0.00294	0.0015	0.0015	0.00038	0.00026	0.00029
1542.66	0.0001	0.00162	0.00288	0.0029	0.003	0.00156	0.00156	0.00039	0.00028	0.00031
1541.24	0.00014	0.00166	0.00297	0.00298	0.00304	0.0016	0.0016	0.00039	0.00029	0.00033
1539.81	0.00014	0.00169	0.00309	0.00298	0.00305	0.00159	0.00159	0.00038	0.00029	0.00033
1538.38	0.0001	0.00173	0.00318	0.0029	0.00304	0.00151	0.00151	0.00036	0.00028	0.00032
1536.95	8e-05	0.00174	0.00324	0.00283	0.00303	0.00145	0.00145	0.00034	0.00026	0.0003
1535.53	6e-05	0.00176	0.00324	0.0028	0.00304	0.00141	0.00141	0.00033	0.00023	0.00027
1534.1	6e-05	0.00177	0.00327	0.0028	0.00305	0.00139	0.00139	0.00031	0.0002	0.00023
1532.67	6e-05	0.00178	0.00327	0.00279	0.00306	0.00136	0.00136	0.0003	0.00016	0.00019
1531.25	6e-05	0.00178	0.00327	0.00276	0.00306	0.00131	0.00131	0.00028	0.00014	0.00016
1529.82	6e-05	0.00179	0.00324	0.00273	0.00306	0.00128	0.00128	0.00028	0.00012	0.00014
1528.39	6e-05	0.00179	0.00324	0.00272	0.00306	0.00125	0.00125	0.00027	0.00013	0.00015
1526.97	8e-05	0.00178	0.00321	0.00273	0.00306	0.00123	0.00123	0.00027	0.00014	0.00018
1525.54	8e-05	0.00177	0.00318	0.00275	0.00304	0.00122	0.00122	0.00026	0.00016	0.0002
1524.11	0.0001	0.00175	0.00315	0.00277	0.00302	0.00123	0.00123	0.00025	0.00017	0.00022
1522.68	0.00012	0.00173	0.00309	0.00276	0.00298	0.00124	0.00124	0.00024	0.00017	0.00023
1521.26	0.00012	0.00169	0.00303	0.00273	0.00292	0.00123	0.00123	0.00022	0.00017	0.00023
1519.83	0.00014	0.00166	0.00294	0.00266	0.00285	0.00119	0.00119	0.00021	0.00016	0.00022
1518.4	0.00014	0.00163	0.00288	0.00259	0.0028	0.00114	0.00114	0.0002	0.00015	0.0002
1516.98	0.00012	0.00159	0.00282	0.00251	0.00276	0.00109	0.00109	0.00019	0.00015	0.0002
1515.55	0.00012	0.00154	0.00276	0.00242	0.0027	0.00104	0.00104	0.00018	0.00015	0.0002
1514.12	0.0001	0.00148	0.00267	0.00232	0.00264	0.00099	0.00099	0.00016	0.00015	0.0002
1512.69	0.0001	0.00144	0.00258	0.00224	0.00259	0.00095	0.00095	0.00014	0.00015	0.0002
1511.27	0.0001	0.0014	0.00252	0.00222	0.00255	0.00094	0.00094	0.00014	0.00014	0.00019
1509.84	0.00012	0.00138	0.00243	0.00224	0.00253	0.00095	0.00095	0.00013	0.00014	0.00018
1508.41	0.00016	0.00134	0.00234	0.0023	0.00249	0.00098	0.00098	0.00013	0.00013	0.00018
1506.99	0.0002	0.00127	0.00222	0.00227	0.00241	0.00095	0.00095	0.00012	0.00013	0.00017
1505.56	0.00018	0.00117	0.00201	0.00207	0.00225	0.00085	0.00085	0.0001	0.00012	0.00017
1504.13	0.00014	0.0011	0.00186	0.00186	0.00212	0.00074	0.00074	8e-05	0.00012	0.00016
1502.7	0.0001	0.00105	0.00174	0.00173	0.00203	0.00068	0.00068	7e-05	0.0001	0.00015
1501.28	0.0001	0.001	0.00168	0.00167	0.00196	0.00064	0.00064	7e-05	9e-05	0.00013
1499.85	0.0001	0.00096	0.00159	0.00162	0.00189	0.00062	0.00062	6e-05	6e-05	0.0001
1498.42	0.00012	0.0009	0.0015	0.00159	0.00181	0.0006	0.0006	5e-05	4e-05	7e-05
1497	0.00014	0.00085	0.00141	0.00153	0.00174	0.00057	0.00057	4e-05	3e-05	5e-05
1495.57	0.00014	0.0008	0.00135	0.00147	0.00168	0.00054	0.00054	4e-05	3e-05	5e-05
1494.14	0.00014	0.00076	0.00126	0.0014	0.00162	0.00051	0.00051	3e-05	3e-05	6e-05
1492.72	0.00014	0.00073	0.0012	0.00136	0.00158	0.0005	0.0005	3e-05	4e-05	7e-05
1491.29	0.00016	0.00071	0.00114	0.00134	0.00155	0.0005	0.0005	3e-05	4e-05	7e-05
1489.86	0.00018	0.00069	0.00105	0.00132	0.00151	0.00049	0.00049	3e-05	4e-05	7e-05
1488.43	0.00018	0.00067	0.00099	0.00127	0.00146	0.00048	0.00048	3e-05	3e-05	6e-05
1487.01	0.00016	0.00064	0.00093	0.00121	0.00141	0.00044	0.00044	2e-05	3e-05	5e-05
1485.58	0.00014	0.00061	0.0009	0.00115	0.00137	0.00041	0.00041	2e-05	2e-05	4e-05
1484.15	0.00012	0.00058	0.00084	0.00111	0.00134	0.00039	0.00039	1e-05	2e-05	4e-05
1482.73	0.00012	0.00055	0.00084	0.00109	0.00132	0.00038	0.00038	1e-05	2e-05	4e-05
1481.3	0.00012	0.00053	0.00081	0.00107	0.0013	0.00037	0.00037	1e-05	2e-05	4e-05
1479.87	0.00012	0.00051	0.00078	0.00105	0.00127	0.00036	0.00036	1e-05	2e-05	4e-05
1478.44	0.00014	0.0005	0.00075	0.00103	0.00125	0.00035	0.00035	1e-05	2e-05	4e-05
1477.02	0.00016	0.00049	0.00069	0.00102	0.00123	0.00035	0.00035	1e-05	2e-05	5e-05
1475.59	0.00018	0.00048	0.00066	0.00103	0.00122	0.00036	0.00036	1e-05	2e-05	5e-05
1474.16	0.0002	0.00047	0.00066	0.00105	0.00122	0.00037	0.00037	1e-05	3e-05	6e-05
1472.74	0.0002	0.00046	0.00063	0.00105	0.00121	0.00037	0.00037	1e-05	3e-05	6e-05
1471.31	0.0002	0.00046	0.00063	0.00102	0.00119	0.00036	0.00036	1e-05	3e-05	6e-05
1469.88	0.00016	0.00045	0.00063	0.00098	0.00117	0.00034	0.00034	1e-05	2e-05	6e-05
1468.46	0.00016	0.00045	0.00063	0.00095	0.00117	0.00033	0.00033	1e-05	2e-05	5e-05
1467.03	0.00016	0.00045	0.00063	0.00095	0.00118	0.00033	0.00033	1e-05	2e-05	5e-05
1465.6	0.00016	0.00046	0.00063	0.00097	0.00119	0.00034	0.00034	1e-05	2e-05	5e-05
1464.17	0.00018	0.00048	0.00066	0.00099	0.0012	0.00034	0.00034	1e-05	2e-05	5e-05
1462.75	0.00018	0.00048	0.00069	0.00101	0.00121	0.00034	0.00034	1e-05	2e-05	5e-05
1461.32	0.00018	0.00049	0.00072	0.00103	0.00122	0.00033	0.00033	1e-05	2e-05	6e-05
1459.89	0.0002	0.0005	0.00072	0.00106	0.00124	0.00035	0.00035	1e-05	2e-05	6e-05
1458.47	0.00026	0.00052	0.00075	0.00112	0.00128	0.00038	0.00038	1e-05	3e-05	7e-05
1457.04	0.00028	0.00055	0.00081	0.00118	0.00132	0.00042	0.00042	1e-05	3e-05	7e-05
1455.61	0.00026	0.00058	0.00087	0.00119	0.00136	0.00042	0.00042	1e-05	3e-05	7e-05
1454.18	0.0002	0.0006	0.00093	0.00119	0.00139	0.00041	0.00041	1e-05	2e-05	6e-05
1452.76	0.00018	0.00062	0.00096	0.00119	0.00142	0.0004	0.0004	1e-05	2e-05	6e-05
1451.33	0.00016	0.00065	0.00099	0.00121	0.00146	0.00041	0.00041	1e-05	2e-05	5e-05
1449.9	0.00016	0.00068	0.00105	0.00126	0.0015	0.00042	0.00042	2e-05	1e-05	4e-05
1448.48	0.00016	0.00072	0.00111	0.00131	0.00156	0.00044	0.00044	2e-05	1e-05	2e-05
1447.05	0.00016	0.00077	0.0012	0.00136	0.00162	0.00046	0.00046	2e-05	0	1e-05
1445.62	0.00014	0.00082	0.00132	0.00142	0.00169	0.00048	0.00048	2e-05	0	0
1444.2	0.00014	0.00088	0.00141	0.00148	0.00176	0.0005	0.0005	2e-05	0	1e-05
1442.77	0.00014	0.00094	0.00153	0.00155	0.00185	0.00052	0.00052	3e-05	0	1e-05
1441.34	0.00014	0.001	0.00165	0.00162	0.00194	0.00055	0.00055	3e-05	0	1e-05
1439.91	0.00014	0.00106	0.0018	0.0017	0.00203	0.00058	0.00058	4e-05	0	2e-05
1438.49	0.00016	0.00113	0.00195	0.0018	0.00212	0.00063	0.00063	5e-05	1e-05	2e-05
1437.06	0.00016	0.0012	0.00213	0.00192	0.00222	0.00069	0.00069	6e-05	1e-05	2e-05
1435.63	0.00016	0.00129	0.00234	0.00204	0.00234	0.00075	0.00075	6e-05	1e-05	2e-05
1434.21	0.00014	0.00136	0.00246	0.00211	0.00242	0.00077	0.00077	7e-05	1e-05	2e-05
1432.78	0.00012	0.00141	0.00252	0.00216	0.00246	0.00079	0.00079	7e-05	1e-05	2e-05
1431.35	0.00012	0.00144	0.00258	0.0022	0.00249	0.00081	0.00081	7e-05	1e-05	2e-05
1429.92	0.00012	0.00147	0.00261	0.00224	0.00253	0.00082	0.00082	7e-05	1e-05	2e-05
1428.5	0.00014	0.00148	0.00261	0.00224	0.00256	0.00081	0.00081	8e-05	1e-05	2e-05
1427.07	0.00012	0.00146	0.00261	0.00223	0.00257	0.0008	0.0008	8e-05	1e-05	3e-05
1425.64	0.00014	0.00143	0.00255	0.00222	0.00256	0.00079	0.00079	7e-05	1e-05	3e-05
1424.22	0.00014	0.0014	0.00249	0.0022	0.00253	0.00079	0.00079	7e-05	1e-05	3e-05
1422.79	0.00016	0.00137	0.0024	0.00217	0.00249	0.00079	0.00079	7e-05	1e-05	4e-05
1421.36	0.00018	0.00134	0.00228	0.00216	0.00245	0.00079	0.00079	6e-05	1e-05	4e-05
1419.93	0.0002	0.00131	0.00219	0.00215	0.00241	0.0008	0.0008	6e-05	1e-05	4e-05
1418.51	0.00022	0.00126	0.0021	0.00212	0.00235	0.00079	0.00079	5e-05	1e-05	4e-05
1417.08	0.0002	0.00121	0.00201	0.00205	0.00229	0.00076	0.00076	5e-05	1e-05	4e-05
1415.65	0.00018	0.00116	0.00195	0.00197	0.00222	0.00072	0.00072	5e-05	1e-05	3e-05
1414.23	0.00016	0.00111	0.00192	0.0019	0.00216	0.00069	0.00069	5e-05	1e-05	3e-05
1412.8	0.00016	0.00108	0.00186	0.00184	0.00211	0.00067	0.00067	5e-05	0	2e-05
1411.37	0.00018	0.00106	0.00177	0.0018	0.00206	0.00066	0.00066	5e-05	0	2e-05
1409.95	0.00018	0.00104	0.00174	0.00178	0.00202	0.00065	0.00065	5e-05	0	1e-05
1408.52	0.00018	0.00102	0.00171	0.00178	0.002	0.00066	0.00066	5e-05	0	1e-05
1407.09	0.00018	0.001	0.00171	0.0018	0.00199	0.00066	0.00066	5e-05	0	1e-05
1405.66	0.0002	0.00099	0.00168	0.00181	0.00199	0.00067	0.00067	4e-05	0	1e-05
1404.24	0.0002	0.00098	0.00168	0.0018	0.00198	0.00067	0.00067	5e-05	0	2e-05
1402.81	0.00022	0.00097	0.00165	0.00179	0.00196	0.00066	0.00066	5e-05	0	2e-05
1401.38	0.00022	0.00096	0.00162	0.00178	0.00195	0.00065	0.00065	4e-05	0	3e-05
1399.96	0.00024	0.00096	0.00159	0.00179	0.00195	0.00066	0.00066	4e-05	0	3e-05
1398.53	0.00026	0.00098	0.00159	0.00183	0.00196	0.00067	0.00067	4e-05	0	3e-05
1397.1	0.00026	0.00099	0.00162	0.00186	0.00196	0.00068	0.00068	4e-05	0	3e-05
1395.67	0.00026	0.001	0.00165	0.00188	0.00196	0.00069	0.00069	4e-05	0	3e-05
1394.25	0.00026	0.001	0.00165	0.00185	0.00195	0.00068	0.00068	4e-05	0	3e-05
1392.82	0.00022	0.00099	0.00162	0.00179	0.00194	0.00066	0.00066	4e-05	0	3e-05
1391.39	0.0002	0.00097	0.00156	0.00174	0.00194	0.00064	0.00064	4e-05	0	3e-05
1389.97	0.0002	0.00095	0.0015	0.00171	0.00194	0.00063	0.00063	4e-05	0	3e-05
1388.54	0.00022	0.00092	0.00144	0.0017	0.00194	0.00062	0.00062	4e-05	0	2e-05
1387.11	0.00022	0.00088	0.00135	0.00168	0.00192	0.00061	0.00061	4e-05	0	2e-05
1385.69	0.00022	0.00085	0.00129	0.00164	0.00188	0.00059	0.00059	3e-05	0	1e-05
1384.26	0.00022	0.00082	0.00123	0.00159	0.00182	0.00058	0.00058	3e-05	0	1e-05
1382.83	0.0002	0.0008	0.0012	0.00154	0.00178	0.00058	0.00058	3e-05	0	1e-05
1381.4	0.0002	0.00077	0.0012	0.0015	0.00175	0.00058	0.00058	3e-05	0	2e-05
1379.98	0.0002	0.00075	0.00114	0.00147	0.00174	0.00057	0.00057	3e-05	0	2e-05
1378.55	0.0002	0.00073	0.00108	0.00146	0.00171	0.00055	0.00055	2e-05	0	2e-05
1377.12	0.00022	0.00071	0.00102	0.00144	0.00167	0.00054	0.00054	2e-05	0	2e-05
1375.7	0.00022	0.00069	0.00099	0.00142	0.00163	0.00053	0.00053	2e-05	0	2e-05
1374.27	0.00024	0.00066	0.00093	0.0014	0.0016	0.00052	0.00052	3e-05	0	2e-05
1372.84	0.00024	0.00064	0.0009	0.00136	0.00157	0.00052	0.00052	3e-05	0	2e-05
1371.41	0.00024	0.00061	0.00087	0.00131	0.00153	0.0005	0.0005	2e-05	0	2e-05
1369.99	0.00022	0.00058	0.00081	0.00125	0.00148	0.00047	0.00047	2e-05	0	3e-05
1368.56	0.00022	0.00054	0.00078	0.00121	0.00142	0.00044	0.00044	1e-05	0	3e-05
1367.13	0.00022	0.00051	0.00072	0.00118	0.00135	0.00041	0.00041	1e-05	0	3e-05
1365.71	0.00022	0.00048	0.00066	0.00117	0.0013	0.0004	0.0004	1e-05	0	2e-05
1364.28	0.00026	0.00046	0.0006	0.00116	0.00126	0.0004	0.0004	1e-05	0	2e-05
1362.85	0.0003	0.00044	0.00054	0.00113	0.00122	0.00039	0.00039	1e-05	0	2e-05
1361.43	0.00034	0.0004	0.00048	0.00106	0.00115	0.00036	0.00036	0	0	2e-05
1360	0.00034	0.00036	0.00042	0.00096	0.00106	0.00032	0.00032	0	0	2e-05
1358.57	0.00034	0.00032	0.00036	0.00086	0.00097	0.00028	0.00028	0	0	3e-05
1357.14	0.00036	0.00027	0.00027	0.00077	0.00088	0.00023	0.00023	0	0	3e-05
1355.72	0.0004	0.00023	0.00021	0.00068	0.0008	0.00019	0.00019	1e-05	0	3e-05
1354.29	0.0004	0.00019	0.00015	0.00063	0.00073	0.00016	0.00016	1e-05	0	4e-05
1352.86	0.00042	0.00017	0.00012	0.0006	0.00069	0.00015	0.00015	1e-05	0	4e-05
1351.44	0.0004	0.00016	0.00012	0.0006	0.00069	0.00016	0.00016	1e-05	0	4e-05
1350.01	0.00036	0.00016	0.00012	0.00063	0.00071	0.00018	0.00018	1e-05	1e-05	5e-05
1348.58	0.00032	0.00017	0.00012	0.00067	0.00075	0.0002	0.0002	0	1e-05	6e-05
1347.15	0.00028	0.00018	0.00015	0.0007	0.00078	0.00022	0.00022	0	1e-05	7e-05
1345.73	0.00028	0.00019	0.00015	0.00071	0.00079	0.00023	0.00023	0	1e-05	7e-05
1344.3	0.00028	0.0002	0.00015	0.00071	0.00079	0.00023	0.00023	0	2e-05	8e-05
1342.87	0.00028	0.00019	0.00015	0.00071	0.00078	0.00024	0.00024	0	2e-05	8e-05
1341.45	0.0003	0.00019	0.00015	0.00072	0.00076	0.00025	0.00025	0	2e-05	8e-05
1340.02	0.00032	0.00018	0.00015	0.00072	0.00073	0.00026	0.00026	0	2e-05	8e-05
1338.59	0.00032	0.00017	0.00015	0.0007	0.00069	0.00025	0.00025	0	2e-05	8e-05
1337.16	0.00032	0.00016	0.00012	0.00065	0.00065	0.00024	0.00024	0	2e-05	8e-05
1335.74	0.0003	0.00014	0.00012	0.00061	0.00063	0.00022	0.00022	0	1e-05	8e-05
1334.31	0.0003	0.00013	9e-05	0.00058	0.0006	0.0002	0.0002	0	1e-05	7e-05
1332.88	0.0003	0.00012	9e-05	0.00057	0.00058	0.0002	0.0002	0	1e-05	7e-05
1331.46	0.0003	0.00012	6e-05	0.00057	0.00056	0.0002	0.0002	0	1e-05	6e-05
1330.03	0.0003	0.00011	6e-05	0.00055	0.00053	0.0002	0.0002	0	0	6e-05
1328.6	0.0003	0.0001	3e-05	0.00053	0.0005	0.0002	0.0002	0	0	5e-05
1327.18	0.0003	8e-05	3e-05	0.00051	0.00048	0.00019	0.00019	0	0	5e-05
1325.75	0.0003	7e-05	3e-05	0.0005	0.00045	0.00018	0.00018	0	0	5e-05
1324.32	0.0003	7e-05	3e-05	0.00049	0.00043	0.00017	0.00017	0	0	5e-05
1322.89	0.00032	6e-05	3e-05	0.00048	0.00041	0.00016	0.00016	0	0	5e-05
1321.47	0.00032	6e-05	0	0.00046	0.0004	0.00015	0.00015	0	0	5e-05
1320.04	0.00034	6e-05	0	0.00044	0.00038	0.00015	0.00015	0	0	5e-05
1318.61	0.00034	5e-05	0	0.00043	0.00037	0.00015	0.00015	0	0	5e-05
1317.19	0.00036	4e-05	0	0.00042	0.00035	0.00015	0.00015	0	0	5e-05
1315.76	0.00038	4e-05	0	0.00042	0.00034	0.00015	0.00015	0	0	5e-05
1314.33	0.0004	3e-05	0	0.00041	0.00034	0.00015	0.00015	0	0	5e-05
1312.9	0.0004	3e-05	0	0.00039	0.00032	0.00014	0.00014	1e-05	0	5e-05
1311.48	0.00042	2e-05	0	0.00037	0.0003	0.00012	0.00012	1e-05	0	4e-05
1310.05	0.00044	2e-05	0	0.00035	0.00028	0.0001	0.0001	1e-05	0	4e-05
1308.62	0.00044	1e-05	0	0.00033	0.00026	9e-05	9e-05	2e-05	0	4e-05
1307.2	0.00046	1e-05	0	0.00031	0.00024	9e-05	9e-05	2e-05	0	4e-05
1305.77	0.00046	1e-05	0	0.0003	0.00022	9e-05	9e-05	2e-05	0	4e-05
1304.34	0.00046	1e-05	0	0.00028	0.0002	9e-05	9e-05	2e-05	0	4e-05
1302.92	0.00046	0	0	0.00027	0.00019	9e-05	9e-05	2e-05	0	5e-05
1301.49	0.00046	0	3e-05	0.00026	0.00018	8e-05	8e-05	2e-05	0	5e-05
1300.06	0.00048	0	3e-05	0.00026	0.00017	9e-05	9e-05	2e-05	0	6e-05
1298.63	0.0005	0	3e-05	0.00025	0.00016	9e-05	9e-05	3e-05	0	6e-05
1297.21	0.00052	0	3e-05	0.00026	0.00015	9e-05	9e-05	3e-05	0	7e-05
1295.78	0.00052	0	3e-05	0.00026	0.00015	8e-05	8e-05	3e-05	1e-05	8e-05
1294.35	0.0005	0	3e-05	0.00027	0.00015	8e-05	8e-05	3e-05	1e-05	9e-05
1292.93	0.00048	0	3e-05	0.00028	0.00015	9e-05	9e-05	2e-05	1e-05	9e-05
1291.5	0.00048	0	3e-05	0.00029	0.00015	0.0001	0.0001	2e-05	1e-05	0.0001
1290.07	0.00048	0	3e-05	0.00029	0.00015	0.0001	0.0001	2e-05	2e-05	0.00011
1288.64	0.00048	0	3e-05	0.00029	0.00015	0.00011	0.00011	1e-05	2e-05	0.00013
1287.22	0.0005	0	3e-05	0.00029	0.00015	0.00011	0.00011	1e-05	3e-05	0.00014
1285.79	0.00052	0	3e-05	0.0003	0.00016	0.00011	0.00011	1e-05	3e-05	0.00015
1284.36	0.00052	0	0	0.00031	0.00017	0.00012	0.00012	1e-05	4e-05	0.00016
1282.94	0.00054	0	0	0.00033	0.00018	0.00014	0.00014	0	4e-05	0.00017
1281.51	0.00054	1e-05	0	0.00035	0.00018	0.00015	0.00015	0	5e-05	0.00019
1280.08	0.00056	1e-05	0	0.00037	0.00018	0.00016	0.00016	0	5e-05	0.0002
1278.65	0.00056	1e-05	0	0.00038	0.00018	0.00018	0.00018	0	6e-05	0.00021
1277.23	0.00056	1e-05	0	0.00039	0.00019	0.0002	0.0002	0	7e-05	0.00022
1275.8	0.00054	1e-05	0	0.0004	0.0002	0.00021	0.00021	0	7e-05	0.00023
1274.37	0.00054	1e-05	0	0.00042	0.00022	0.00023	0.00023	0	8e-05	0.00023
1272.95	0.00052	2e-05	0	0.00043	0.00023	0.00023	0.00023	0	8e-05	0.00023
1271.52	0.00052	2e-05	0	0.00044	0.00023	0.00023	0.00023	0	8e-05	0.00023
1270.09	0.00052	2e-05	0	0.00045	0.00023	0.00023	0.00023	0	8e-05	0.00023
1268.67	0.00052	1e-05	0	0.00045	0.00024	0.00022	0.00022	0	7e-05	0.00022
1267.24	0.00052	1e-05	0	0.00047	0.00024	0.00022	0.00022	0	7e-05	0.00021
1265.81	0.00052	1e-05	0	0.00049	0.00024	0.00022	0.00022	0	6e-05	0.0002
1264.38	0.0005	1e-05	0	0.0005	0.00023	0.00022	0.00022	0	6e-05	0.00019
1262.96	0.0005	1e-05	0	0.0005	0.00024	0.00023	0.00023	0	5e-05	0.00018
1261.53	0.0005	1e-05	0	0.0005	0.00024	0.00023	0.00023	0	4e-05	0.00017
1260.1	0.0005	1e-05	0	0.00049	0.00025	0.00022	0.00022	0	4e-05	0.00015
1258.68	0.00052	1e-05	0	0.00047	0.00025	0.00021	0.00021	0	3e-05	0.00014
1257.25	0.00054	1e-05	0	0.00045	0.00024	0.0002	0.0002	0	2e-05	0.00013
1255.82	0.00056	0	0	0.00043	0.00023	0.00018	0.00018	0	2e-05	0.00012
1254.39	0.00056	0	0	0.0004	0.00021	0.00016	0.00016	1e-05	1e-05	0.00012
1252.97	0.00058	0	3e-05	0.00038	0.0002	0.00015	0.00015	1e-05	1e-05	0.00011
1251.54	0.00058	0	3e-05	0.00037	0.0002	0.00015	0.00015	1e-05	1e-05	0.0001
1250.11	0.0006	0	3e-05	0.00036	0.00019	0.00015	0.00015	1e-05	0	9e-05
1248.69	0.00058	0	6e-05	0.00035	0.00018	0.00014	0.00014	1e-05	0	8e-05
1247.26	0.00058	0	6e-05	0.00034	0.00018	0.00014	0.00014	2e-05	0	7e-05
1245.83	0.0006	0	6e-05	0.00034	0.00017	0.00014	0.00014	2e-05	0	6e-05
1244.41	0.0006	0	6e-05	0.00033	0.00017	0.00014	0.00014	2e-05	0	6e-05
1242.98	0.00062	0	6e-05	0.00031	0.00016	0.00013	0.00013	2e-05	0	5e-05
1241.55	0.00066	0	9e-05	0.00028	0.00014	0.00012	0.00012	2e-05	0	5e-05
1240.12	0.0007	0	9e-05	0.00027	0.00013	0.00011	0.00011	2e-05	0	4e-05
1238.7	0.00072	0	0.00012	0.00027	0.00013	0.0001	0.0001	3e-05	0	3e-05
1237.27	0.00074	0	0.00012	0.00028	0.00013	0.0001	0.0001	4e-05	0	3e-05
1235.84	0.00074	0	0.00012	0.00029	0.00014	9e-05	9e-05	4e-05	1e-05	2e-05
1234.42	0.00074	0	0.00012	0.0003	0.00015	8e-05	8e-05	5e-05	1e-05	2e-05
1232.99	0.00074	0	0.00012	0.0003	0.00015	8e-05	8e-05	5e-05	1e-05	2e-05
1231.56	0.00076	1e-05	0.00012	0.00029	0.00015	8e-05	8e-05	5e-05	1e-05	2e-05
1230.13	0.00078	1e-05	0.00015	0.00028	0.00015	8e-05	8e-05	5e-05	1e-05	1e-05
1228.71	0.0008	0	0.00018	0.00027	0.00015	8e-05	8e-05	6e-05	1e-05	1e-05
1227.28	0.00082	0	0.00018	0.00027	0.00014	8e-05	8e-05	6e-05	2e-05	1e-05
1225.85	0.00082	0	0.00015	0.00027	0.00014	8e-05	8e-05	7e-05	2e-05	1e-05
1224.43	0.00082	1e-05	0.00012	0.00027	0.00014	7e-05	7e-05	7e-05	2e-05	1e-05
1223	0.00082	1e-05	0.00015	0.00026	0.00014	6e-05	6e-05	7e-05	2e-05	1e-05
1221.57	0.00086	1e-05	0.00018	0.00025	0.00014	6e-05	6e-05	7e-05	3e-05	1e-05
1220.15	0.00086	2e-05	0.00018	0.00025	0.00014	6e-05	6e-05	8e-05	3e-05	0
1218.72	0.00086	2e-05	0.00021	0.00024	0.00013	6e-05	6e-05	9e-05	4e-05	0
1217.29	0.00088	1e-05	0.00021	0.00025	0.00012	6e-05	6e-05	9e-05	4e-05	0
1215.86	0.0009	1e-05	0.00024	0.00025	0.0001	6e-05	6e-05	0.0001	4e-05	0
1214.44	0.00092	2e-05	0.00024	0.00026	9e-05	6e-05	6e-05	0.00012	5e-05	0
1213.01	0.00096	2e-05	0.00027	0.00026	9e-05	5e-05	5e-05	0.00013	5e-05	0
1211.58	0.00098	2e-05	0.00024	0.00026	0.0001	5e-05	5e-05	0.00013	5e-05	0
1210.16	0.00098	2e-05	0.00027	0.00027	0.00011	6e-05	6e-05	0.00013	6e-05	0
1208.73	0.00098	2e-05	0.00027	0.00027	0.00011	6e-05	6e-05	0.00012	6e-05	0
1207.3	0.00098	2e-05	0.00027	0.00028	0.00012	6e-05	6e-05	0.00012	6e-05	0
1205.87	0.00098	2e-05	0.00027	0.00028	0.00012	7e-05	7e-05	0.00012	6e-05	0
1204.45	0.001	2e-05	0.00027	0.00028	0.00013	7e-05	7e-05	0.00012	6e-05	0
1203.02	0.00104	2e-05	0.0003	0.00027	0.00013	7e-05	7e-05	0.00013	7e-05	0
1201.59	0.00108	2e-05	0.00033	0.00027	0.00012	6e-05	6e-05	0.00014	7e-05	0
1200.17	0.0011	2e-05	0.00036	0.00025	0.00012	6e-05	6e-05	0.00014	8e-05	0

## Sheet: 3e
wavenumber	1	2	3	4	5	6	7	8	9	10	11	12
3200.92	0.03438	0.07122	0.0585	0.04272	-0.06107	-0.06152	-0.02836	-0.00591	0.01136	0.00408	0.00134	0.00018
3199.49	0.03522	0.07056	0.05821	0.04272	-0.06083	-0.06428	-0.028	-0.00411	0.011	0.00405	0.00122	0.00018
3198.06	0.03522	0.0703	0.05955	0.04272	-0.06131	-0.06644	-0.02896	-0.00111	0.01064	0.00399	0.00107	0.00018
3196.64	0.0345	0.0706	0.06195	0.042	-0.06179	-0.06716	-0.03088	0.00285	0.01055	0.00396	0.00101	0.00018
3195.21	0.03378	0.07128	0.06483	0.0408	-0.06083	-0.06656	-0.03292	0.00609	0.01085	0.00405	0.0011	0.00018
3193.78	0.03354	0.07188	0.06656	0.0396	-0.05939	-0.0644	-0.03448	0.00657	0.0113	0.00423	0.00128	0.00018
3192.36	0.03348	0.07212	0.06618	0.03888	-0.05951	-0.06128	-0.03568	0.00417	0.01154	0.00438	0.00143	0.00018
3190.93	0.03324	0.07204	0.06406	0.03936	-0.06095	-0.05792	-0.03544	0.00069	0.01142	0.00441	0.00152	0.00018
3189.5	0.0327	0.0719	0.06205	0.04032	-0.06083	-0.05588	-0.03388	-0.00219	0.01112	0.00429	0.00152	0.00021
3188.07	0.03204	0.07182	0.06109	0.04032	-0.05867	-0.05612	-0.03268	-0.00435	0.01085	0.00414	0.00152	0.00021
3186.65	0.0315	0.07178	0.06032	0.0384	-0.05771	-0.05768	-0.03304	-0.00567	0.01067	0.00408	0.00149	0.00021
3185.22	0.03114	0.0716	0.05926	0.03648	-0.06071	-0.059	-0.0334	-0.00627	0.01064	0.00414	0.00143	0.00021
3183.79	0.03138	0.07128	0.05859	0.03624	-0.06539	-0.05864	-0.03148	-0.00627	0.01082	0.00435	0.00137	0.00021
3182.37	0.03228	0.07108	0.05898	0.0372	-0.06731	-0.0566	-0.02752	-0.00555	0.01112	0.00459	0.00131	0.00021
3180.94	0.03342	0.07122	0.05984	0.03864	-0.06491	-0.05348	-0.02428	-0.00387	0.01142	0.00465	0.00128	0.00024
3179.51	0.03426	0.07158	0.05994	0.03888	-0.06107	-0.0506	-0.02392	-0.00219	0.01166	0.00453	0.00134	0.00024
3178.09	0.03444	0.07182	0.05955	0.03816	-0.05915	-0.04904	-0.025	-0.00159	0.01184	0.00432	0.0014	0.00024
3176.66	0.03438	0.0717	0.06003	0.0372	-0.05963	-0.04772	-0.02428	-0.00171	0.01205	0.00426	0.00152	0.00021
3175.23	0.03438	0.07146	0.06157	0.03696	-0.06071	-0.0452	-0.0214	-0.00027	0.0122	0.00432	0.00161	0.00021
3173.8	0.03426	0.07138	0.0632	0.03768	-0.06059	-0.04208	-0.01924	0.00345	0.01226	0.00444	0.00167	0.00021
3172.38	0.03414	0.07158	0.06358	0.03888	-0.05819	-0.04064	-0.01912	0.00741	0.0122	0.00453	0.00167	0.00021
3170.95	0.03426	0.07198	0.06282	0.0408	-0.05387	-0.0416	-0.01816	0.00837	0.01205	0.00459	0.00161	0.00024
3169.52	0.03432	0.07248	0.06147	0.04296	-0.04967	-0.0434	-0.01516	0.00537	0.0119	0.00462	0.00161	0.00024
3168.1	0.03366	0.07288	0.06051	0.04488	-0.04739	-0.0452	-0.01264	0.00093	0.01178	0.00462	0.00164	0.00024
3166.67	0.03258	0.07296	0.06051	0.04584	-0.04619	-0.04664	-0.01216	-0.00135	0.01178	0.00471	0.00176	0.00027
3165.24	0.03192	0.07272	0.06109	0.04584	-0.04499	-0.04712	-0.01264	-0.00087	0.01187	0.00477	0.00191	0.00027
3163.81	0.0321	0.07238	0.06118	0.0444	-0.04463	-0.0464	-0.01252	0.00045	0.01199	0.0048	0.00197	0.00027
3162.39	0.03264	0.07216	0.06118	0.04272	-0.04583	-0.0446	-0.01264	0.00141	0.01205	0.0048	0.002	0.00027
3160.96	0.03324	0.07216	0.06186	0.04176	-0.04643	-0.04292	-0.0136	0.00237	0.01205	0.00486	0.00206	0.00024
3159.53	0.0336	0.0723	0.06339	0.042	-0.04427	-0.04208	-0.01432	0.00273	0.01199	0.00495	0.00206	0.00024
3158.11	0.0336	0.0724	0.06483	0.04296	-0.04091	-0.04184	-0.0136	0.00213	0.01193	0.00498	0.00197	0.00024
3156.68	0.03318	0.0724	0.06541	0.04368	-0.04019	-0.0422	-0.01228	0.00165	0.01196	0.00492	0.00182	0.00021
3155.25	0.033	0.07236	0.06531	0.04368	-0.04283	-0.04304	-0.0118	0.00261	0.01211	0.00486	0.00176	0.00021
3153.83	0.0336	0.0723	0.06483	0.0432	-0.04583	-0.04376	-0.01168	0.00453	0.0122	0.00498	0.00173	0.00021
3152.4	0.03456	0.0722	0.06426	0.04152	-0.04607	-0.0434	-0.01048	0.00549	0.01214	0.00519	0.00173	0.00021
3150.97	0.03498	0.07214	0.06378	0.03912	-0.04319	-0.04304	-0.00748	0.00501	0.0119	0.00543	0.0017	0.00021
3149.54	0.0345	0.07212	0.06358	0.0372	-0.03971	-0.04376	-0.004	0.00525	0.01178	0.00555	0.00164	0.00021
3148.12	0.03372	0.07202	0.06339	0.0372	-0.03779	-0.04544	-0.00172	0.00669	0.01187	0.00558	0.00161	0.00021
3146.69	0.03336	0.0718	0.0632	0.0384	-0.03767	-0.04628	-0.0016	0.00801	0.01214	0.00552	0.00167	0.00021
3145.26	0.03366	0.07168	0.06339	0.0396	-0.03767	-0.0458	-0.00316	0.00753	0.01235	0.00543	0.00173	0.00021
3143.84	0.0342	0.07182	0.06378	0.04056	-0.03707	-0.04448	-0.0052	0.00549	0.01244	0.00534	0.00179	0.00024
3142.41	0.03474	0.07206	0.06406	0.04176	-0.03695	-0.0434	-0.00604	0.00441	0.01241	0.00528	0.00185	0.00024
3140.98	0.03522	0.07208	0.06378	0.04344	-0.03815	-0.04316	-0.0052	0.00573	0.01235	0.00528	0.00191	0.00024
3139.55	0.03546	0.0719	0.06291	0.04488	-0.04007	-0.04316	-0.00328	0.00837	0.01235	0.00528	0.00197	0.00024
3138.13	0.03534	0.07174	0.06195	0.04584	-0.04223	-0.04256	-0.00268	0.00969	0.01238	0.00531	0.00206	0.00024
3136.7	0.03486	0.07174	0.06128	0.04632	-0.04427	-0.04112	-0.00484	0.00873	0.01238	0.0054	0.00212	0.00024
3135.27	0.03444	0.07168	0.06138	0.04656	-0.04607	-0.0398	-0.00784	0.00825	0.01235	0.00549	0.00212	0.00024
3133.85	0.03438	0.0715	0.06224	0.04608	-0.04631	-0.03932	-0.0076	0.01149	0.01235	0.00552	0.002	0.00024
3132.42	0.03438	0.0713	0.06349	0.04536	-0.04415	-0.0398	-0.00328	0.01857	0.01262	0.00555	0.00194	0.00027
3130.99	0.03432	0.07138	0.06464	0.04512	-0.04019	-0.04064	0.0008	0.02505	0.01298	0.00567	0.002	0.00027
3129.57	0.03444	0.07166	0.06512	0.04488	-0.03683	-0.04124	0.00068	0.02733	0.01325	0.00579	0.00209	0.00027
3128.14	0.03486	0.0719	0.06464	0.04392	-0.03527	-0.04136	-0.0028	0.02553	0.01331	0.00576	0.00212	0.0003
3126.71	0.0354	0.07196	0.06339	0.04224	-0.03443	-0.04088	-0.00688	0.02253	0.01316	0.00555	0.00206	0.00027
3125.28	0.03576	0.072	0.06195	0.04032	-0.03275	-0.03992	-0.00928	0.02049	0.01295	0.00531	0.00197	0.00027
3123.86	0.036	0.0722	0.06157	0.03888	-0.03059	-0.03836	-0.00952	0.02085	0.01265	0.00513	0.00188	0.00024
3122.43	0.03624	0.07252	0.06282	0.03792	-0.02987	-0.0362	-0.00712	0.02289	0.01238	0.00504	0.00176	0.00021
3121	0.03672	0.07284	0.06531	0.03816	-0.03191	-0.0338	-0.00292	0.02385	0.01226	0.00501	0.00164	0.00021
3119.58	0.03744	0.0731	0.06733	0.03984	-0.03599	-0.03164	0.00152	0.02157	0.01238	0.00504	0.00161	0.00021
3118.15	0.03786	0.07318	0.068	0.04176	-0.03971	-0.03044	0.00476	0.01665	0.01259	0.00513	0.0017	0.00024
3116.72	0.03762	0.07312	0.06781	0.04296	-0.04139	-0.0302	0.00704	0.01329	0.01283	0.00531	0.00182	0.00024
3115.29	0.03696	0.07304	0.06762	0.04296	-0.04031	-0.02996	0.011	0.01593	0.01307	0.00552	0.00188	0.00024
3113.87	0.03666	0.0731	0.06752	0.04296	-0.03695	-0.02948	0.017	0.02385	0.01331	0.00573	0.00191	0.00024
3112.44	0.0366	0.07326	0.06704	0.04296	-0.03275	-0.02996	0.02072	0.03093	0.01343	0.00582	0.00191	0.00024
3111.01	0.03624	0.0734	0.06618	0.04248	-0.03047	-0.03164	0.01844	0.03153	0.01343	0.00576	0.00197	0.00024
3109.59	0.03582	0.07328	0.0656	0.04128	-0.03095	-0.03308	0.01268	0.02721	0.01343	0.0057	0.00203	0.00024
3108.16	0.0357	0.07288	0.0655	0.04032	-0.03203	-0.03224	0.00836	0.02337	0.01352	0.00576	0.00203	0.00024
3106.73	0.036	0.07244	0.06598	0.04032	-0.03227	-0.0296	0.00716	0.02289	0.01367	0.00588	0.00206	0.00021
3105.3	0.03612	0.07214	0.06637	0.04104	-0.03203	-0.02672	0.0068	0.02433	0.01373	0.00597	0.00212	0.00021
3103.88	0.03576	0.07214	0.06637	0.042	-0.03131	-0.02432	0.00464	0.02481	0.01355	0.00591	0.00221	0.00021
3102.45	0.03504	0.07236	0.06608	0.04272	-0.02927	-0.02228	0.00068	0.02217	0.01319	0.0057	0.00224	0.00021
3101.02	0.03462	0.07272	0.06598	0.0432	-0.02627	-0.02072	-0.00328	0.01809	0.01295	0.00552	0.00221	0.00021
3099.6	0.03468	0.07318	0.06637	0.04368	-0.02399	-0.02012	-0.00424	0.01689	0.01301	0.00546	0.00221	0.00021
3098.17	0.03498	0.07362	0.06704	0.04368	-0.02339	-0.02	-0.00052	0.02085	0.01316	0.00546	0.00218	0.00021
3096.74	0.0351	0.07378	0.06685	0.04272	-0.02303	-0.02	0.00692	0.02889	0.01319	0.00546	0.00218	0.00021
3095.32	0.03516	0.07358	0.06579	0.04128	-0.02195	-0.02012	0.01376	0.03561	0.0131	0.00546	0.00218	0.00018
3093.89	0.03564	0.07324	0.06474	0.04032	-0.02075	-0.02048	0.01592	0.03705	0.01295	0.00546	0.00218	0.00018
3092.46	0.03648	0.07306	0.06445	0.04032	-0.02051	-0.02048	0.0134	0.03453	0.01283	0.00555	0.00218	0.00018
3091.03	0.03708	0.0731	0.06445	0.04224	-0.02039	-0.01844	0.0104	0.03261	0.01277	0.00561	0.00215	0.00018
3089.61	0.03726	0.07314	0.06454	0.04512	-0.01931	-0.014	0.01016	0.03345	0.01283	0.00564	0.00215	0.00018
3088.18	0.0372	0.07298	0.06474	0.04728	-0.01739	-0.00872	0.01304	0.03801	0.01304	0.0057	0.00218	0.00015
3086.75	0.03726	0.07268	0.0657	0.0468	-0.01667	-0.00524	0.0164	0.04497	0.01337	0.00576	0.00221	0.00015
3085.33	0.03708	0.07244	0.06714	0.04464	-0.01883	-0.00596	0.01628	0.04893	0.01367	0.00573	0.00221	0.00012
3083.9	0.0363	0.07232	0.06829	0.042	-0.02279	-0.01076	0.01208	0.04449	0.01373	0.00561	0.00218	0.00012
3082.47	0.03516	0.0723	0.06858	0.04056	-0.02579	-0.01748	0.00728	0.03345	0.01349	0.00549	0.00209	0.00012
3081.04	0.03438	0.07234	0.06848	0.04032	-0.02627	-0.02252	0.00584	0.02409	0.01313	0.0054	0.00194	0.00012
3079.62	0.0342	0.07252	0.06838	0.0408	-0.02495	-0.02252	0.00788	0.02241	0.01295	0.0054	0.00182	0.00012
3078.19	0.03432	0.07288	0.06829	0.042	-0.02219	-0.01772	0.01124	0.02817	0.01292	0.00546	0.00176	9e-05
3076.76	0.03462	0.0733	0.0679	0.04296	-0.01787	-0.01172	0.01472	0.03537	0.01295	0.00561	0.00182	0.00012
3075.34	0.03534	0.0736	0.06781	0.04368	-0.01343	-0.00824	0.01688	0.03693	0.01295	0.00573	0.00197	0.00012
3073.91	0.03618	0.07366	0.06781	0.04344	-0.01067	-0.00776	0.017	0.03189	0.01292	0.00582	0.00215	0.00012
3072.48	0.0366	0.07348	0.06771	0.04248	-0.00971	-0.00848	0.0158	0.02565	0.01292	0.00585	0.0023	0.00012
3071.06	0.03666	0.07318	0.06694	0.04176	-0.00983	-0.0086	0.01496	0.02373	0.01304	0.00591	0.00236	0.00012
3069.63	0.03666	0.07296	0.06627	0.04104	-0.01091	-0.00752	0.01508	0.02685	0.01322	0.00591	0.00227	0.00012
3068.2	0.03672	0.07294	0.06598	0.04008	-0.01271	-0.00656	0.01592	0.03285	0.01337	0.00579	0.00215	9e-05
3066.77	0.03654	0.07308	0.06608	0.03864	-0.01427	-0.00812	0.01628	0.03741	0.01337	0.00561	0.00203	9e-05
3065.35	0.03594	0.0732	0.06598	0.0372	-0.01487	-0.01196	0.01544	0.03753	0.01322	0.00549	0.00197	9e-05
3063.92	0.03534	0.07316	0.0656	0.03648	-0.01511	-0.01556	0.01496	0.03453	0.01319	0.00555	0.002	9e-05
3062.49	0.03564	0.07306	0.0655	0.03744	-0.01415	-0.01676	0.01676	0.03321	0.01337	0.00567	0.00215	9e-05
3061.07	0.0369	0.07308	0.06598	0.03912	-0.01175	-0.01592	0.02024	0.03645	0.01352	0.00579	0.00224	9e-05
3059.64	0.03804	0.07316	0.06666	0.0408	-0.00899	-0.014	0.02288	0.04221	0.01355	0.00579	0.00224	9e-05
3058.21	0.0381	0.0731	0.06694	0.04152	-0.00863	-0.0116	0.02312	0.04533	0.01346	0.0057	0.00212	9e-05
3056.78	0.03744	0.0729	0.06704	0.04152	-0.01019	-0.00944	0.02132	0.04245	0.0134	0.00558	0.002	9e-05
3055.36	0.03726	0.07278	0.06762	0.04128	-0.01115	-0.00848	0.01904	0.03633	0.01343	0.00558	0.002	9e-05
3053.93	0.03798	0.07288	0.06896	0.0408	-0.01007	-0.00824	0.01772	0.03261	0.01346	0.00561	0.00212	9e-05
3052.5	0.03918	0.07316	0.07011	0.04032	-0.00839	-0.00728	0.01736	0.03273	0.01352	0.00564	0.00224	9e-05
3051.08	0.0402	0.0733	0.07059	0.04008	-0.00707	-0.005	0.01784	0.03429	0.01352	0.00561	0.0023	9e-05
3049.65	0.04068	0.0732	0.07078	0.04032	-0.00515	-0.00248	0.01964	0.03585	0.01352	0.00561	0.00233	9e-05
3048.22	0.04044	0.07302	0.07126	0.04056	-0.00107	-0.00116	0.02228	0.03777	0.01355	0.00576	0.00236	9e-05
3046.8	0.03996	0.07302	0.07184	0.0408	0.00433	-0.00092	0.02408	0.03885	0.01373	0.006	0.00242	9e-05
3045.37	0.03984	0.07336	0.07222	0.04056	0.00973	-0.00092	0.02396	0.03849	0.01406	0.00627	0.00254	9e-05
3043.94	0.04002	0.07382	0.07251	0.04056	0.01333	-0.00068	0.02336	0.03813	0.01436	0.00648	0.00263	9e-05
3042.51	0.0402	0.07408	0.07261	0.0408	0.01333	-0.00104	0.02384	0.03873	0.01454	0.0066	0.00272	9e-05
3041.09	0.0399	0.07402	0.07222	0.04104	0.00937	-0.00248	0.0254	0.03897	0.01454	0.0066	0.00272	9e-05
3039.66	0.03936	0.07394	0.07117	0.0408	0.00337	-0.00416	0.02684	0.03765	0.01439	0.00657	0.00263	9e-05
3038.23	0.03894	0.074	0.0704	0.04104	-0.00107	-0.0044	0.02708	0.03561	0.01424	0.00651	0.00254	9e-05
3036.81	0.03876	0.0741	0.0703	0.04176	-0.00167	-0.00248	0.026	0.03417	0.01409	0.00645	0.00245	9e-05
3035.38	0.03876	0.07408	0.0705	0.04272	0.00049	0.00088	0.02444	0.03405	0.01394	0.00636	0.00239	9e-05
3033.95	0.03858	0.07394	0.07021	0.0432	0.00217	0.0034	0.023	0.03477	0.01376	0.00621	0.0023	9e-05
3032.52	0.03804	0.0738	0.06915	0.04272	0.00133	0.00364	0.02204	0.03585	0.01355	0.00603	0.00224	9e-05
3031.1	0.0375	0.0738	0.06848	0.04224	-0.00059	0.0022	0.02288	0.03765	0.01349	0.00597	0.00221	9e-05
3029.67	0.03756	0.0739	0.06906	0.042	-0.00095	0.00064	0.02588	0.03993	0.01373	0.00609	0.00227	9e-05
3028.24	0.03834	0.07396	0.0704	0.04176	0.00109	0.0004	0.02924	0.04125	0.01415	0.00633	0.00233	9e-05
3026.82	0.03924	0.07386	0.07165	0.04176	0.00397	0.00256	0.03068	0.04125	0.01442	0.00648	0.00233	9e-05
3025.39	0.03978	0.0737	0.07261	0.04152	0.00637	0.00664	0.03056	0.04113	0.01451	0.00654	0.00233	6e-05
3023.96	0.03966	0.0736	0.07328	0.04224	0.00877	0.01096	0.03056	0.04257	0.01451	0.0066	0.00239	6e-05
3022.53	0.0393	0.0737	0.07366	0.0432	0.01141	0.013	0.03224	0.04629	0.01454	0.00678	0.00254	9e-05
3021.11	0.03918	0.07402	0.07347	0.04416	0.01369	0.01288	0.0374	0.05565	0.01466	0.00699	0.00269	9e-05
3019.68	0.03936	0.07446	0.0728	0.04368	0.01537	0.0136	0.04772	0.07545	0.01481	0.00711	0.00284	6e-05
3018.25	0.03948	0.07478	0.07203	0.042	0.01813	0.01792	0.06248	0.10209	0.01493	0.00711	0.00287	6e-05
3016.83	0.0393	0.07482	0.07107	0.04032	0.02329	0.0244	0.07496	0.12057	0.01502	0.00702	0.00281	6e-05
3015.4	0.039	0.07462	0.0704	0.0396	0.02881	0.02896	0.07784	0.11865	0.01496	0.0069	0.00272	6e-05
3013.97	0.03882	0.07434	0.0705	0.04032	0.03073	0.02884	0.07004	0.10029	0.01481	0.00678	0.0026	6e-05
3012.55	0.03888	0.07416	0.07117	0.04128	0.02869	0.0256	0.05744	0.07929	0.0146	0.00663	0.00254	6e-05
3011.12	0.03936	0.07414	0.07146	0.04176	0.02593	0.02284	0.04664	0.06393	0.01439	0.00651	0.00257	6e-05
3009.69	0.04026	0.0743	0.07136	0.04224	0.02521	0.02176	0.04076	0.05469	0.01436	0.00648	0.00272	6e-05
3008.26	0.04152	0.0745	0.07222	0.04296	0.02593	0.02104	0.0398	0.05037	0.01448	0.00657	0.0029	9e-05
3006.84	0.04254	0.07464	0.07453	0.0432	0.02665	0.01912	0.04124	0.04905	0.01469	0.00675	0.00296	9e-05
3005.41	0.04254	0.07464	0.07702	0.04272	0.02689	0.01612	0.04232	0.04965	0.0149	0.00696	0.00293	6e-05
3003.98	0.04164	0.0746	0.07827	0.04248	0.02653	0.0136	0.0428	0.05061	0.01502	0.00711	0.00284	6e-05
3002.56	0.04056	0.07458	0.07789	0.04296	0.02545	0.01228	0.04412	0.05133	0.0152	0.00714	0.00284	6e-05
3001.13	0.03996	0.07458	0.07683	0.04416	0.02425	0.01216	0.04616	0.05133	0.01541	0.00705	0.00287	6e-05
2999.7	0.0396	0.07442	0.07616	0.04464	0.02437	0.01348	0.04736	0.05049	0.01556	0.0069	0.00293	6e-05
2998.27	0.0396	0.07416	0.07587	0.0444	0.02533	0.016	0.04652	0.04857	0.0155	0.00681	0.00293	6e-05
2996.85	0.04002	0.07412	0.0752	0.04344	0.02509	0.01804	0.044	0.04605	0.0152	0.00678	0.0029	6e-05
2995.42	0.04116	0.07444	0.07414	0.04272	0.02233	0.01864	0.04184	0.04425	0.01487	0.00681	0.00284	6e-05
2993.99	0.04242	0.07492	0.07357	0.0432	0.01921	0.019	0.04124	0.04485	0.01472	0.00684	0.00278	6e-05
2992.57	0.04338	0.07516	0.07405	0.04488	0.01801	0.02032	0.04208	0.04797	0.01481	0.00687	0.00275	6e-05
2991.14	0.04374	0.07504	0.07501	0.04632	0.01825	0.022	0.04364	0.05241	0.01505	0.00696	0.00275	6e-05
2989.71	0.0435	0.07478	0.07578	0.04584	0.01825	0.02296	0.0452	0.05625	0.0152	0.00702	0.00272	6e-05
2988.29	0.04272	0.07462	0.07654	0.04368	0.01861	0.0238	0.04628	0.05745	0.01526	0.00705	0.00272	6e-05
2986.86	0.0417	0.07466	0.07741	0.04152	0.02125	0.02488	0.04748	0.05541	0.01526	0.00717	0.00275	6e-05
2985.43	0.04104	0.0748	0.07808	0.0408	0.02605	0.02512	0.04904	0.05169	0.01538	0.00732	0.00284	6e-05
2984	0.04122	0.07482	0.07808	0.042	0.03013	0.02332	0.05012	0.04953	0.01553	0.00744	0.00293	6e-05
2982.58	0.04194	0.0747	0.07722	0.04368	0.03145	0.02104	0.04964	0.05061	0.01565	0.00744	0.00299	6e-05
2981.15	0.04248	0.07464	0.07635	0.04464	0.03061	0.02116	0.04856	0.05481	0.01565	0.00744	0.00299	6e-05
2979.72	0.0423	0.07482	0.07616	0.04512	0.02965	0.02428	0.04928	0.06129	0.01556	0.00744	0.00296	6e-05
2978.3	0.0417	0.07516	0.07674	0.0456	0.02929	0.02764	0.05108	0.06681	0.01544	0.00744	0.00293	6e-05
2976.87	0.04128	0.07544	0.07789	0.04632	0.02917	0.0286	0.0512	0.06789	0.01535	0.00747	0.00296	3e-05
2975.44	0.0414	0.07546	0.07885	0.04704	0.02941	0.02764	0.04892	0.06405	0.01535	0.00747	0.00299	3e-05
2974.01	0.04188	0.0752	0.07923	0.0468	0.03061	0.0274	0.04664	0.05973	0.01547	0.00744	0.00302	6e-05
2972.59	0.0423	0.0749	0.07933	0.04608	0.03193	0.0298	0.04736	0.05901	0.01553	0.00735	0.00302	3e-05
2971.16	0.04254	0.07476	0.07923	0.0456	0.03217	0.03364	0.05132	0.06165	0.01556	0.00723	0.00305	3e-05
2969.73	0.04236	0.07484	0.07856	0.04536	0.03097	0.03664	0.056	0.06453	0.01565	0.00714	0.00308	3e-05
2968.31	0.0417	0.07502	0.07779	0.04512	0.02977	0.03748	0.05816	0.06465	0.01589	0.00717	0.00311	3e-05
2966.88	0.04092	0.0753	0.0777	0.0444	0.03037	0.03712	0.05684	0.06225	0.01616	0.00726	0.00311	3e-05
2965.45	0.04032	0.07566	0.07846	0.04392	0.03301	0.03628	0.0542	0.06009	0.01637	0.00735	0.00314	3e-05
2964.02	0.0399	0.07592	0.07923	0.0444	0.03661	0.03556	0.053	0.05973	0.01646	0.00732	0.00317	3e-05
2962.6	0.03966	0.07592	0.07933	0.04584	0.03901	0.03544	0.05504	0.06093	0.01643	0.00732	0.0032	3e-05
2961.17	0.0399	0.07568	0.07914	0.04704	0.03961	0.0364	0.05972	0.06345	0.01634	0.00738	0.0032	3e-05
2959.74	0.04044	0.07538	0.07933	0.04776	0.03925	0.03892	0.065	0.06801	0.01625	0.00747	0.00314	3e-05
2958.32	0.04086	0.07524	0.0801	0.04776	0.03913	0.04192	0.06764	0.07245	0.01619	0.00753	0.00308	3e-05
2956.89	0.04098	0.07532	0.08115	0.04752	0.03925	0.04312	0.06644	0.07329	0.01625	0.00759	0.00305	3e-05
2955.46	0.0414	0.0756	0.08202	0.04656	0.03877	0.0412	0.06308	0.06993	0.01637	0.00768	0.00308	3e-05
2954.04	0.04212	0.07584	0.08259	0.04536	0.03733	0.0376	0.06044	0.06561	0.01652	0.0078	0.00311	3e-05
2952.61	0.04266	0.07588	0.08278	0.04368	0.03565	0.03508	0.05996	0.06273	0.01667	0.00786	0.00317	3e-05
2951.18	0.04272	0.07576	0.08259	0.04176	0.03565	0.03496	0.06128	0.06273	0.01676	0.00786	0.00317	3e-05
2949.75	0.04266	0.07566	0.08182	0.04008	0.03817	0.03748	0.06308	0.06513	0.0167	0.0078	0.00314	3e-05
2948.33	0.0426	0.07558	0.08077	0.04008	0.04213	0.0412	0.06344	0.06777	0.01643	0.00774	0.00308	3e-05
2946.9	0.04248	0.07542	0.08038	0.04152	0.04429	0.04324	0.06032	0.06681	0.0161	0.00768	0.00308	3e-05
2945.47	0.04212	0.07514	0.08106	0.04296	0.04261	0.04132	0.0548	0.06285	0.01595	0.00771	0.00311	3e-05
2944.05	0.042	0.07496	0.08202	0.04416	0.03841	0.03748	0.05024	0.05937	0.01601	0.00777	0.00317	3e-05
2942.62	0.04236	0.0751	0.08221	0.04416	0.03517	0.03568	0.04868	0.05829	0.01622	0.00786	0.00314	3e-05
2941.19	0.0429	0.07552	0.08154	0.04392	0.03505	0.03736	0.04964	0.05841	0.01637	0.00786	0.00308	3e-05
2939.76	0.04314	0.07594	0.08096	0.04368	0.03793	0.04024	0.05228	0.05889	0.0164	0.00786	0.00308	3e-05
2938.34	0.04296	0.07614	0.08096	0.04416	0.04213	0.04192	0.05612	0.06033	0.01634	0.00789	0.0032	3e-05
2936.91	0.04272	0.076	0.08077	0.04536	0.04513	0.04132	0.05924	0.06177	0.01631	0.00792	0.00332	3e-05
2935.48	0.04266	0.07572	0.07962	0.04608	0.04513	0.03952	0.05984	0.06165	0.01637	0.00798	0.00335	3e-05
2934.06	0.04272	0.0756	0.07808	0.04536	0.04261	0.0382	0.0572	0.05961	0.01649	0.00798	0.00332	3e-05
2932.63	0.04284	0.07574	0.07702	0.04392	0.04021	0.03808	0.0536	0.05709	0.01655	0.00798	0.00326	3e-05
2931.2	0.04296	0.07596	0.07693	0.04248	0.03937	0.0382	0.05216	0.05601	0.01655	0.00792	0.00323	3e-05
2929.78	0.0429	0.07608	0.0776	0.04176	0.03973	0.03736	0.05432	0.05769	0.01658	0.00789	0.00323	3e-05
2928.35	0.04254	0.07604	0.07866	0.042	0.04033	0.0358	0.0578	0.06165	0.01658	0.00789	0.00329	3e-05
2926.92	0.04206	0.07592	0.0801	0.04248	0.04057	0.0346	0.05936	0.06477	0.01658	0.00792	0.00329	3e-05
2925.49	0.04212	0.07572	0.08134	0.04296	0.04045	0.03412	0.05744	0.06393	0.01661	0.00792	0.00326	3e-05
2924.07	0.04284	0.07542	0.08202	0.04344	0.03997	0.03436	0.0542	0.05961	0.01661	0.00786	0.0032	3e-05
2922.64	0.04374	0.07516	0.08202	0.04392	0.04021	0.0358	0.05216	0.05481	0.01661	0.0078	0.00323	3e-05
2921.21	0.04422	0.07512	0.08163	0.04416	0.04165	0.0388	0.05204	0.05181	0.01655	0.00783	0.00326	3e-05
2919.79	0.0441	0.07528	0.08115	0.0444	0.04405	0.04276	0.05288	0.05157	0.01655	0.00792	0.00332	3e-05
2918.36	0.04374	0.07544	0.08106	0.04416	0.04621	0.04612	0.05432	0.05469	0.01658	0.00807	0.00338	3e-05
2916.93	0.04362	0.07542	0.08125	0.04344	0.04681	0.04792	0.05648	0.05961	0.01664	0.00819	0.00344	3e-05
2915.5	0.04368	0.07518	0.08192	0.04272	0.04573	0.04816	0.059	0.06321	0.01658	0.00825	0.00347	3e-05
2914.08	0.0438	0.07478	0.0825	0.04272	0.04465	0.04756	0.06104	0.06345	0.01646	0.00825	0.0035	3e-05
2912.65	0.04392	0.07444	0.0825	0.04368	0.04537	0.04636	0.06236	0.06153	0.01637	0.00816	0.00353	3e-05
2911.22	0.0441	0.07442	0.08173	0.04416	0.04729	0.04504	0.06284	0.05985	0.01643	0.0081	0.00353	3e-05
2909.8	0.04398	0.07478	0.08048	0.04392	0.04849	0.04372	0.0626	0.05985	0.01667	0.00807	0.00353	3e-05
2908.37	0.04344	0.0752	0.07971	0.0432	0.04801	0.04252	0.06116	0.06165	0.01694	0.00813	0.0035	3e-05
2906.94	0.04302	0.07542	0.07971	0.04248	0.04741	0.0418	0.059	0.06441	0.01712	0.00819	0.0035	3e-05
2905.52	0.04308	0.07558	0.0801	0.04224	0.04813	0.0418	0.0572	0.06657	0.01718	0.00819	0.00344	3e-05
2904.09	0.04344	0.07576	0.08058	0.04272	0.05053	0.04204	0.0566	0.06705	0.01709	0.00816	0.00338	3e-05
2902.66	0.04362	0.07584	0.08163	0.04392	0.05281	0.04144	0.05684	0.06561	0.017	0.00813	0.00335	0
2901.23	0.04332	0.07574	0.08298	0.04512	0.05281	0.04048	0.05708	0.06237	0.01697	0.00813	0.00335	0
2899.81	0.04242	0.07562	0.08384	0.04528	0.05053	0.04096	0.0578	0.05865	0.01703	0.0081	0.00338	0
2898.38	0.04128	0.07564	0.08384	0.0452	0.04837	0.04324	0.06032	0.05685	0.01715	0.0081	0.00344	0
2896.95	0.04068	0.07562	0.08326	0.04512	0.04765	0.04552	0.0638	0.05793	0.01724	0.00807	0.0035	0
2895.53	0.04092	0.07544	0.08278	0.0452	0.04717	0.04684	0.06548	0.05985	0.01721	0.00807	0.00356	0
2894.1	0.04176	0.07528	0.0825	0.04544	0.04633	0.04744	0.065	0.05985	0.01712	0.00807	0.00362	0
2892.67	0.0423	0.07526	0.08259	0.04592	0.04633	0.04816	0.06452	0.05829	0.01703	0.0081	0.00371	0
2891.24	0.04248	0.0753	0.08326	0.04624	0.04837	0.04864	0.06536	0.05709	0.01706	0.00819	0.00377	0
2889.82	0.04278	0.07532	0.08384	0.04624	0.05041	0.04792	0.06704	0.05709	0.01715	0.00831	0.0038	3e-05
2888.39	0.04338	0.07542	0.08413	0.046	0.05029	0.04648	0.06836	0.05805	0.01718	0.00837	0.0038	0
2886.96	0.04386	0.0757	0.08422	0.0456	0.04873	0.0448	0.06932	0.05937	0.01715	0.00834	0.00377	0
2885.54	0.04386	0.07604	0.08422	0.04536	0.04849	0.043	0.06956	0.06021	0.01718	0.00831	0.00371	0
2884.11	0.04344	0.07622	0.08374	0.04536	0.05041	0.04204	0.06824	0.05925	0.01727	0.00834	0.00365	0
2882.68	0.04308	0.0762	0.08269	0.04544	0.05209	0.04276	0.06572	0.05661	0.01739	0.00837	0.00362	0
2881.25	0.04302	0.07618	0.08221	0.04536	0.05137	0.0448	0.06284	0.05445	0.01742	0.00843	0.00365	0
2879.83	0.0429	0.07624	0.08307	0.04504	0.04873	0.04756	0.0608	0.05469	0.01733	0.00846	0.00371	0
2878.4	0.04266	0.07624	0.08461	0.0448	0.04633	0.05068	0.05984	0.05733	0.01727	0.00846	0.00377	0
2876.97	0.04236	0.076	0.08518	0.0448	0.04669	0.05356	0.06056	0.06129	0.01727	0.00849	0.0038	0
2875.55	0.04242	0.07564	0.0848	0.04504	0.05017	0.05524	0.0626	0.06465	0.01724	0.00846	0.00377	0
2874.12	0.04296	0.0754	0.08451	0.04528	0.05485	0.05572	0.06452	0.06705	0.01715	0.00846	0.00371	0
2872.69	0.04368	0.0754	0.08461	0.04528	0.05821	0.05572	0.06428	0.06861	0.017	0.00846	0.00371	0
2871.27	0.04416	0.0755	0.08451	0.04528	0.05941	0.0556	0.06212	0.06897	0.01694	0.00849	0.00368	0
2869.84	0.04434	0.07556	0.08365	0.04536	0.06025	0.05512	0.06068	0.06849	0.01694	0.00855	0.00371	0
2868.41	0.04452	0.07556	0.08269	0.0456	0.06121	0.05404	0.06212	0.06825	0.01703	0.00858	0.00371	0
2866.98	0.04476	0.07558	0.0825	0.04576	0.06169	0.05272	0.06536	0.06897	0.01715	0.00861	0.00374	0
2865.56	0.04488	0.0756	0.08278	0.0456	0.06109	0.05164	0.06812	0.07017	0.01727	0.00861	0.00377	0
2864.13	0.04464	0.07562	0.08307	0.04528	0.05977	0.05128	0.06932	0.07065	0.0173	0.00861	0.0038	0
2862.7	0.04434	0.07568	0.08326	0.0448	0.05893	0.052	0.06932	0.06981	0.01721	0.00864	0.00386	0
2861.28	0.0441	0.07574	0.08394	0.04448	0.05917	0.05344	0.06848	0.06813	0.01709	0.0087	0.00392	0
2859.85	0.0438	0.07568	0.0849	0.04432	0.06025	0.05488	0.06776	0.06717	0.01703	0.0087	0.00398	0
2858.42	0.04332	0.07552	0.08547	0.0444	0.06109	0.05548	0.06704	0.06837	0.01712	0.00864	0.00398	0
2856.99	0.04302	0.0755	0.08538	0.04456	0.06073	0.0556	0.06608	0.07101	0.01727	0.00861	0.00392	0
2855.57	0.04314	0.07576	0.08499	0.04488	0.05893	0.05584	0.06476	0.07317	0.01733	0.00861	0.00389	0
2854.14	0.0438	0.0762	0.0849	0.04536	0.05713	0.05584	0.0638	0.07365	0.01736	0.00867	0.00392	0
2852.71	0.04452	0.07656	0.08528	0.04576	0.05629	0.05512	0.06356	0.07305	0.01742	0.0087	0.00398	0
2851.29	0.04512	0.0766	0.08586	0.04576	0.05713	0.0532	0.06308	0.07257	0.01748	0.00873	0.00404	0
2849.86	0.0453	0.07634	0.08614	0.0456	0.06025	0.05128	0.06224	0.07281	0.01748	0.0087	0.00407	0
2848.43	0.04512	0.07602	0.08576	0.04544	0.06565	0.05116	0.06188	0.07353	0.01739	0.00861	0.00407	0
2847.01	0.04476	0.07588	0.0848	0.04552	0.07081	0.05236	0.062	0.07365	0.01721	0.00858	0.00404	0
2845.58	0.0447	0.07596	0.08384	0.0456	0.07213	0.05344	0.06188	0.07209	0.01712	0.00861	0.00398	0
2844.15	0.0447	0.07616	0.08317	0.04536	0.06949	0.05356	0.06116	0.06861	0.01712	0.0087	0.00392	0
2842.72	0.04428	0.07642	0.08307	0.04512	0.06565	0.0538	0.0614	0.06525	0.01721	0.00882	0.00389	0
2841.3	0.0435	0.07658	0.08326	0.04512	0.06301	0.05452	0.06272	0.06429	0.0173	0.00888	0.00386	0
2839.87	0.04278	0.07648	0.08317	0.0452	0.06085	0.05512	0.06404	0.06597	0.01736	0.00894	0.0038	0
2838.44	0.04254	0.07616	0.08259	0.04512	0.05785	0.05476	0.06416	0.06813	0.01745	0.00891	0.00377	0
2837.02	0.04272	0.07576	0.08182	0.04496	0.05449	0.05392	0.0632	0.06921	0.01757	0.00888	0.00377	0
2835.59	0.04296	0.07538	0.08192	0.0448	0.05293	0.05404	0.06248	0.06981	0.01769	0.00882	0.0038	0
2834.16	0.04308	0.07512	0.08307	0.0448	0.05545	0.05596	0.06284	0.07005	0.01781	0.00885	0.00386	0
2832.73	0.04296	0.07506	0.0847	0.0448	0.06157	0.05836	0.06428	0.06957	0.01787	0.00888	0.00389	0
2831.31	0.04272	0.07512	0.08566	0.0448	0.06793	0.05956	0.06632	0.06777	0.01793	0.00894	0.00392	0
2829.88	0.0426	0.07514	0.08586	0.0448	0.07093	0.05872	0.06836	0.06561	0.0179	0.00894	0.00395	0
2828.45	0.04266	0.07512	0.08538	0.0448	0.07045	0.05668	0.0698	0.06465	0.01778	0.00891	0.00389	0
2827.03	0.04296	0.0752	0.08432	0.04472	0.06949	0.05416	0.07028	0.06501	0.0176	0.00888	0.00383	0
2825.6	0.04338	0.07544	0.08346	0.04456	0.06997	0.05224	0.06968	0.06561	0.01754	0.00888	0.00386	0
2824.17	0.04386	0.0757	0.08346	0.0444	0.07117	0.05236	0.0686	0.06549	0.01754	0.00888	0.00392	0
2822.74	0.04434	0.0758	0.08451	0.0444	0.07129	0.055	0.068	0.06489	0.01754	0.00888	0.00395	0
2821.32	0.04446	0.07576	0.08566	0.0444	0.06961	0.05872	0.06776	0.06405	0.01748	0.00888	0.00395	0
2819.89	0.04398	0.0757	0.08605	0.04432	0.06781	0.06088	0.06728	0.06321	0.01748	0.00891	0.00392	0
2818.46	0.04314	0.07564	0.08614	0.04432	0.06793	0.06064	0.06656	0.06273	0.0176	0.00897	0.00395	0
2817.04	0.0426	0.07554	0.08643	0.04448	0.07081	0.06016	0.06584	0.06273	0.01778	0.00906	0.00398	0
2815.61	0.04278	0.07534	0.08701	0.0448	0.07465	0.06088	0.065	0.06297	0.01793	0.00918	0.00395	0
2814.18	0.04326	0.07508	0.0873	0.04512	0.07693	0.06208	0.06368	0.06321	0.01799	0.00924	0.00389	0
2812.76	0.04356	0.07486	0.08739	0.04536	0.07645	0.06232	0.06248	0.06381	0.01796	0.00927	0.00383	0
2811.33	0.04374	0.07482	0.0873	0.04552	0.07441	0.0616	0.06224	0.06501	0.01787	0.00924	0.0038	0
2809.9	0.0438	0.07494	0.08691	0.0456	0.07213	0.0604	0.06248	0.06573	0.01781	0.00918	0.00386	0
2808.47	0.04374	0.075	0.08614	0.0456	0.07045	0.05932	0.06224	0.06453	0.01769	0.00912	0.00395	0
2807.05	0.04362	0.07494	0.08528	0.04544	0.06913	0.05908	0.06164	0.06201	0.01751	0.00903	0.00401	0
2805.62	0.04362	0.07494	0.0848	0.0452	0.06805	0.06028	0.06104	0.06069	0.01736	0.00897	0.00404	0
2804.19	0.04392	0.07518	0.0849	0.04512	0.06733	0.06196	0.06152	0.06177	0.01736	0.00897	0.00404	0
2802.77	0.04446	0.07558	0.08499	0.04512	0.06709	0.06232	0.06308	0.06369	0.01751	0.00903	0.00404	0
2801.34	0.045	0.07582	0.08518	0.04496	0.06745	0.06088	0.06548	0.06489	0.01766	0.00909	0.0041	0
2200.54	0.0456	0.07664	0.08931	0.04776	0.07741	0.06981	0.07266	0.07225	0.01784	0.00965	0.00455	3e-05
2199.12	0.04572	0.07674	0.08922	0.04768	0.0775	0.0699	0.07277	0.07223	0.01784	0.00964	0.00456	3e-05
2197.69	0.04592	0.07676	0.08918	0.04776	0.0775	0.06995	0.07286	0.07229	0.01785	0.00964	0.00457	3e-05
2196.26	0.04604	0.0766	0.08922	0.048	0.07742	0.06994	0.07297	0.07245	0.0179	0.00965	0.00458	3e-05
2194.83	0.04598	0.07642	0.08915	0.04824	0.07737	0.06992	0.07311	0.07262	0.01796	0.00967	0.00459	3e-05
2193.41	0.0459	0.07636	0.08912	0.04848	0.07742	0.06994	0.07329	0.07273	0.01799	0.00969	0.00458	3e-05
2191.98	0.04588	0.07646	0.08931	0.04856	0.07753	0.07001	0.07346	0.07278	0.01799	0.00971	0.00458	3e-05
2190.55	0.04594	0.07654	0.08963	0.04864	0.07764	0.07009	0.07357	0.07284	0.01797	0.00972	0.00458	3e-05
2189.13	0.04594	0.07662	0.08992	0.0488	0.0778	0.07019	0.0736	0.07294	0.01793	0.00974	0.00459	3e-05
2187.7	0.04592	0.07676	0.09008	0.04888	0.07807	0.07038	0.07359	0.07308	0.0179	0.00976	0.00459	3e-05
2186.27	0.04594	0.07692	0.09034	0.04904	0.07843	0.07065	0.07363	0.07322	0.01788	0.00976	0.00458	3e-05
2184.84	0.04606	0.0769	0.09066	0.04912	0.07873	0.07089	0.07372	0.07336	0.01787	0.00976	0.00459	3e-05
2183.42	0.0462	0.07674	0.09094	0.04912	0.07885	0.07099	0.07383	0.07348	0.01788	0.00976	0.00459	3e-05
2181.99	0.04624	0.07656	0.09101	0.04904	0.07876	0.07096	0.07386	0.07353	0.0179	0.00976	0.0046	3e-05
2180.56	0.04616	0.07648	0.09075	0.04896	0.07858	0.07088	0.07385	0.07349	0.01794	0.00978	0.00461	3e-05
2179.14	0.04604	0.07648	0.09037	0.04888	0.07844	0.07083	0.07384	0.07342	0.01798	0.0098	0.00461	3e-05
2177.71	0.04588	0.07652	0.09005	0.04872	0.07836	0.07085	0.0739	0.07338	0.01802	0.00981	0.00461	3e-05
2176.28	0.04572	0.07662	0.08986	0.04856	0.0783	0.07097	0.07399	0.07339	0.01806	0.0098	0.00461	3e-05
2174.86	0.04566	0.0768	0.08986	0.04856	0.07827	0.07117	0.07408	0.07343	0.01808	0.00979	0.00461	3e-05
2173.43	0.0457	0.07694	0.08992	0.04856	0.0783	0.07134	0.07419	0.07346	0.01806	0.00979	0.00462	3e-05
2172	0.04578	0.07694	0.08998	0.04856	0.07839	0.07138	0.07431	0.07349	0.01802	0.00979	0.00462	3e-05
2170.57	0.04582	0.07684	0.08998	0.04856	0.07847	0.07131	0.07442	0.07353	0.01798	0.0098	0.00463	3e-05
2169.15	0.04582	0.0768	0.08986	0.04856	0.07857	0.0712	0.07451	0.07363	0.01797	0.00978	0.00463	3e-05
2167.72	0.0459	0.07682	0.08973	0.04864	0.07872	0.07114	0.07457	0.07382	0.01797	0.00975	0.00462	3e-05
2166.29	0.04602	0.07684	0.08966	0.04872	0.07883	0.07115	0.07458	0.07401	0.01797	0.00973	0.00461	3e-05
2164.87	0.0461	0.07682	0.08963	0.04864	0.07887	0.07118	0.07454	0.07412	0.01796	0.00972	0.00459	3e-05
2163.44	0.04616	0.07674	0.0895	0.04856	0.07887	0.07119	0.07449	0.07409	0.01794	0.00972	0.00459	3e-05
2162.01	0.04622	0.07658	0.08938	0.0484	0.07888	0.07117	0.07448	0.074	0.01793	0.00973	0.00458	3e-05
2160.58	0.04626	0.07634	0.08922	0.04832	0.07881	0.07118	0.07454	0.07391	0.01791	0.00974	0.00458	3e-05
2159.16	0.04624	0.07614	0.08899	0.04816	0.07863	0.07126	0.07458	0.07379	0.01789	0.00975	0.00457	3e-05
2157.73	0.0462	0.0761	0.0888	0.04784	0.07844	0.07133	0.07452	0.07362	0.01785	0.00975	0.00457	3e-05
2156.3	0.04616	0.07616	0.08861	0.04744	0.07833	0.07132	0.07439	0.07347	0.01781	0.00972	0.00457	3e-05
2154.88	0.04612	0.07614	0.08842	0.04704	0.07829	0.07118	0.07427	0.0734	0.01778	0.00969	0.00457	3e-05
2153.45	0.04604	0.076	0.08819	0.0468	0.0782	0.07096	0.07418	0.07341	0.01777	0.00966	0.00456	3e-05
2152.02	0.04588	0.0759	0.088	0.04656	0.07805	0.07075	0.07411	0.07339	0.01776	0.00964	0.00454	3e-05
2150.59	0.0457	0.07598	0.08787	0.0464	0.07795	0.0706	0.07402	0.07333	0.01775	0.00963	0.00453	3e-05
2149.17	0.04562	0.0761	0.08774	0.04632	0.07798	0.0705	0.07394	0.07329	0.01773	0.00962	0.00451	3e-05
2147.74	0.04572	0.07612	0.08758	0.04624	0.07814	0.07046	0.07387	0.07328	0.01773	0.00959	0.0045	3e-05
2146.31	0.04592	0.07612	0.08742	0.04616	0.07831	0.07049	0.07382	0.07325	0.01774	0.00956	0.00449	3e-05
2144.89	0.0461	0.07612	0.0873	0.046	0.07834	0.07055	0.07378	0.07317	0.01773	0.00955	0.00448	3e-05
2143.46	0.04616	0.07614	0.0872	0.04608	0.07821	0.07056	0.07372	0.07308	0.01769	0.00956	0.00448	4e-05
2142.03	0.04618	0.07622	0.08736	0.0464	0.07806	0.07055	0.0737	0.07302	0.01766	0.00958	0.00448	4e-05
2140.61	0.04624	0.07644	0.0879	0.0472	0.07809	0.07063	0.07376	0.07304	0.01766	0.0096	0.00448	4e-05
2139.18	0.04636	0.07688	0.08886	0.04856	0.07828	0.07088	0.07386	0.07314	0.01766	0.0096	0.00449	4e-05
2137.75	0.0464	0.07748	0.08998	0.05056	0.07853	0.07124	0.07395	0.07327	0.01767	0.00959	0.00451	3e-05
2136.32	0.04634	0.07824	0.0913	0.05296	0.07876	0.07155	0.074	0.0734	0.01768	0.0096	0.00452	3e-05
2134.9	0.0463	0.07922	0.09299	0.05568	0.07906	0.07172	0.07405	0.07354	0.01773	0.00963	0.00454	3e-05
2133.47	0.04646	0.08048	0.09523	0.05888	0.07948	0.07185	0.07416	0.07371	0.0178	0.00967	0.00455	3e-05
2132.04	0.0468	0.082	0.09792	0.0624	0.07999	0.07209	0.07443	0.07391	0.01786	0.00973	0.00457	3e-05
2130.62	0.04728	0.08362	0.10083	0.06624	0.08052	0.07245	0.07481	0.07412	0.01791	0.00979	0.00461	3e-05
2129.19	0.0477	0.08516	0.10374	0.07	0.08107	0.07288	0.07521	0.07431	0.01798	0.00986	0.00465	3e-05
2127.76	0.04802	0.08654	0.1064	0.07344	0.08166	0.07331	0.07556	0.07445	0.0181	0.00992	0.00469	2e-05
2126.33	0.04818	0.08782	0.10858	0.07608	0.08233	0.07377	0.07586	0.07457	0.01827	0.01	0.00472	2e-05
2124.91	0.04826	0.08906	0.10998	0.07776	0.08313	0.0743	0.07615	0.0747	0.01851	0.01011	0.00477	2e-05
2123.48	0.04836	0.09032	0.11085	0.07816	0.08408	0.07493	0.0765	0.07487	0.0188	0.01026	0.00484	2e-05
2122.05	0.04852	0.09136	0.11136	0.07712	0.08512	0.0756	0.07695	0.07506	0.01917	0.01042	0.00492	2e-05
2120.63	0.04872	0.09188	0.11142	0.07472	0.0862	0.07631	0.07752	0.07529	0.01961	0.01061	0.005	2e-05
2119.2	0.04882	0.09176	0.11082	0.07152	0.08732	0.07709	0.0782	0.0756	0.02012	0.0108	0.00507	2e-05
2117.77	0.04876	0.0911	0.1096	0.06832	0.08849	0.07802	0.07897	0.07603	0.02071	0.01098	0.00513	2e-05
2116.35	0.04858	0.09016	0.10813	0.06536	0.08963	0.07907	0.07975	0.07657	0.02135	0.01114	0.00519	2e-05
2114.92	0.04832	0.08908	0.10672	0.06272	0.09061	0.08008	0.08051	0.07717	0.02203	0.01128	0.00522	3e-05
2113.49	0.04806	0.08804	0.10541	0.0604	0.09131	0.08084	0.08125	0.07775	0.02264	0.01139	0.00524	3e-05
2112.06	0.04784	0.08708	0.10403	0.05824	0.09168	0.08121	0.08187	0.07819	0.02311	0.01145	0.00524	3e-05
2110.64	0.04772	0.0862	0.10266	0.0564	0.09169	0.08122	0.08227	0.07845	0.02334	0.01144	0.00524	3e-05
2109.21	0.04766	0.08532	0.10138	0.05496	0.0913	0.08096	0.08237	0.07858	0.02332	0.01137	0.00522	3e-05
2107.78	0.04754	0.08446	0.10022	0.05392	0.09054	0.08053	0.08214	0.0786	0.02307	0.01124	0.00518	3e-05
2106.36	0.04734	0.0837	0.09917	0.0532	0.08954	0.07995	0.08162	0.07846	0.02263	0.01106	0.00511	3e-05
2104.93	0.04712	0.08306	0.09824	0.05264	0.08848	0.07922	0.08092	0.07816	0.02208	0.01087	0.00503	3e-05
2103.5	0.04696	0.08258	0.09754	0.05216	0.08749	0.07839	0.08021	0.0778	0.02147	0.01068	0.00495	3e-05
2102.07	0.04686	0.08222	0.09706	0.05176	0.08659	0.07757	0.07958	0.07747	0.02089	0.01053	0.00488	3e-05
2100.65	0.0468	0.08196	0.0968	0.05152	0.08582	0.07686	0.07903	0.07715	0.02042	0.01041	0.00483	3e-05
2099.22	0.04674	0.08174	0.09674	0.05136	0.08518	0.07629	0.07856	0.07681	0.02007	0.0103	0.00479	3e-05
2097.79	0.0467	0.0816	0.09686	0.05128	0.08467	0.07584	0.07817	0.07646	0.0198	0.01021	0.00475	3e-05
2096.37	0.04666	0.08152	0.09706	0.05136	0.08426	0.0755	0.07789	0.07618	0.0196	0.01013	0.00472	3e-05
2094.94	0.04662	0.08154	0.09725	0.0516	0.08392	0.07525	0.07767	0.07598	0.01943	0.01006	0.00469	3e-05
2093.51	0.04654	0.08164	0.09728	0.05152	0.08359	0.07508	0.07748	0.07587	0.01926	0.01001	0.00466	3e-05
2092.09	0.04648	0.0818	0.09728	0.05136	0.08326	0.07497	0.07731	0.07587	0.01909	0.00995	0.00464	3e-05
2090.66	0.04646	0.08208	0.09744	0.0512	0.08307	0.07494	0.07716	0.07596	0.01893	0.00989	0.00461	3e-05
2089.23	0.04648	0.08244	0.09786	0.0512	0.08312	0.07498	0.07709	0.07608	0.01883	0.00986	0.00459	3e-05
2087.8	0.04656	0.08282	0.09856	0.05144	0.0833	0.07512	0.07713	0.07616	0.01878	0.00986	0.00459	3e-05
2086.38	0.04668	0.08324	0.09942	0.05176	0.08347	0.07536	0.07724	0.07625	0.01877	0.00989	0.0046	3e-05
2084.95	0.04684	0.08366	0.10029	0.052	0.08359	0.07561	0.07736	0.07636	0.01877	0.00991	0.00462	3e-05
2083.52	0.04694	0.0841	0.10118	0.0524	0.08375	0.07579	0.07746	0.07647	0.01876	0.00991	0.00462	3e-05
2082.1	0.0469	0.08458	0.10221	0.05304	0.08408	0.0759	0.07761	0.07658	0.01874	0.00991	0.0046	3e-05
2080.67	0.0468	0.08512	0.10352	0.054	0.08461	0.07605	0.07789	0.07673	0.01871	0.0099	0.00459	3e-05
2079.24	0.04672	0.08584	0.10515	0.05528	0.08531	0.07634	0.07832	0.07699	0.01871	0.00991	0.0046	3e-05
2077.81	0.04668	0.0867	0.10694	0.05648	0.08606	0.07673	0.0788	0.07729	0.01872	0.00992	0.00462	3e-05
2076.39	0.04668	0.08756	0.10854	0.05712	0.08665	0.07707	0.0791	0.0775	0.01874	0.00991	0.00463	3e-05
2074.96	0.04678	0.08836	0.10986	0.05744	0.08702	0.0773	0.07915	0.07755	0.01873	0.00989	0.00462	3e-05
2073.53	0.047	0.08912	0.11114	0.05792	0.08737	0.07758	0.07914	0.07755	0.01874	0.00989	0.0046	3e-05
2072.11	0.04724	0.08994	0.11264	0.05896	0.08788	0.07811	0.0793	0.07764	0.01879	0.00992	0.0046	3e-05
2070.68	0.0474	0.09094	0.11453	0.0604	0.08865	0.07894	0.07968	0.07793	0.0189	0.00996	0.00461	3e-05
2069.25	0.0475	0.0922	0.1168	0.06216	0.08964	0.07987	0.0802	0.07836	0.01902	0.01	0.00461	3e-05
2067.82	0.04758	0.09366	0.11936	0.06392	0.09076	0.08071	0.08079	0.07877	0.0191	0.01	0.00459	3e-05
2066.4	0.04766	0.09524	0.12214	0.06576	0.09198	0.08147	0.08143	0.07911	0.01916	0.00996	0.00456	4e-05
2064.97	0.04772	0.0969	0.12515	0.06792	0.09344	0.08242	0.08222	0.07951	0.01928	0.00996	0.00455	4e-05
2063.54	0.04778	0.09866	0.12851	0.07048	0.09533	0.08382	0.08324	0.08012	0.01954	0.01006	0.00459	4e-05
2062.12	0.04784	0.10062	0.13238	0.07376	0.09771	0.08566	0.0845	0.08095	0.01992	0.01025	0.00467	3e-05
2060.69	0.04792	0.1028	0.13686	0.07776	0.10047	0.08774	0.08589	0.08188	0.02029	0.01042	0.00476	3e-05
2059.26	0.04802	0.10526	0.14198	0.08264	0.10357	0.08996	0.08738	0.08288	0.02062	0.01056	0.00485	3e-05
2057.84	0.04818	0.10802	0.1479	0.0884	0.10714	0.09242	0.08904	0.08403	0.02096	0.01069	0.00493	3e-05
2056.41	0.04836	0.11114	0.15491	0.09512	0.11132	0.09533	0.09096	0.08536	0.02136	0.01086	0.00501	3e-05
2054.98	0.0486	0.11472	0.16333	0.10296	0.1162	0.09886	0.09308	0.0868	0.02182	0.01106	0.0051	3e-05
2053.55	0.04886	0.11888	0.17306	0.11192	0.12177	0.10297	0.09533	0.08824	0.02231	0.01128	0.00518	3e-05
2052.13	0.04914	0.1237	0.18387	0.122	0.12809	0.10751	0.09772	0.08969	0.02283	0.01152	0.00527	3e-05
2050.7	0.04938	0.12912	0.19549	0.13296	0.13523	0.11241	0.10035	0.09123	0.0234	0.01176	0.00537	3e-05
2049.27	0.04956	0.13498	0.20784	0.14472	0.14316	0.11762	0.10321	0.09291	0.02402	0.01203	0.00549	3e-05
2047.85	0.04968	0.14114	0.22093	0.1572	0.15174	0.12311	0.10618	0.09467	0.02468	0.01232	0.00563	2e-05
2046.42	0.04984	0.14752	0.23475	0.17072	0.16069	0.12874	0.10916	0.09635	0.02535	0.01262	0.00579	2e-05
2044.99	0.0501	0.15404	0.24874	0.18568	0.16965	0.13436	0.11206	0.09787	0.02601	0.01293	0.00594	2e-05
2043.56	0.05044	0.16068	0.2624	0.20232	0.17837	0.13992	0.11486	0.09931	0.02667	0.01323	0.00609	2e-05
2042.14	0.05076	0.16746	0.27549	0.22048	0.18694	0.14545	0.11757	0.10079	0.02738	0.01357	0.00625	2e-05
2040.71	0.05104	0.17428	0.288	0.2396	0.19565	0.15102	0.12026	0.10239	0.02818	0.01399	0.00647	2e-05
2039.28	0.0513	0.1809	0.29974	0.2584	0.20449	0.1565	0.12296	0.10406	0.0291	0.0145	0.00676	2e-05
2037.86	0.05162	0.18704	0.3104	0.2752	0.213	0.1616	0.12569	0.10578	0.03005	0.01505	0.00707	1e-05
2036.43	0.052	0.19246	0.31962	0.2876	0.22052	0.16618	0.12845	0.10754	0.03099	0.01557	0.00737	1e-05
2035	0.05244	0.19694	0.32678	0.29328	0.22654	0.1703	0.13121	0.10929	0.0319	0.01607	0.00764	1e-05
2033.58	0.05282	0.20036	0.33126	0.29128	0.23101	0.17409	0.13394	0.11105	0.03281	0.01652	0.00789	1e-05
2032.15	0.05306	0.2026	0.33274	0.282	0.23419	0.17752	0.1366	0.11293	0.0337	0.01692	0.00808	1e-05
2030.72	0.05326	0.20358	0.33117	0.26728	0.23618	0.18038	0.13911	0.11501	0.03449	0.01722	0.0082	1e-05
2029.29	0.0535	0.2032	0.32682	0.24912	0.23677	0.1825	0.14136	0.1172	0.03517	0.01741	0.00825	1e-05
2027.87	0.05382	0.20166	0.32022	0.22952	0.2357	0.1838	0.14333	0.11937	0.03572	0.0175	0.00824	1e-05
2026.44	0.05406	0.19924	0.31187	0.21008	0.23304	0.18432	0.14512	0.12152	0.03612	0.01751	0.00819	1e-05
2025.01	0.05416	0.19622	0.30227	0.19208	0.22923	0.18409	0.14688	0.12369	0.03633	0.01746	0.00809	1e-05
2023.59	0.05418	0.19282	0.29174	0.17608	0.22484	0.1832	0.14869	0.1259	0.03638	0.01734	0.00798	1e-05
2022.16	0.05416	0.18914	0.28064	0.16192	0.22025	0.18174	0.15037	0.12803	0.03632	0.01717	0.00784	1e-05
2020.73	0.0541	0.18524	0.26938	0.14944	0.21552	0.17984	0.15161	0.12989	0.03616	0.01695	0.00768	1e-05
2019.3	0.05402	0.18126	0.25846	0.13808	0.2106	0.17766	0.15224	0.13141	0.03587	0.01667	0.00748	2e-05
2017.88	0.05394	0.17746	0.24835	0.128	0.2057	0.17547	0.15253	0.13275	0.03555	0.01641	0.00729	2e-05
2016.45	0.05396	0.17416	0.23949	0.11968	0.20137	0.17364	0.15292	0.13415	0.03541	0.01626	0.00719	2e-05
2015.02	0.05402	0.17144	0.23197	0.11328	0.19801	0.17238	0.1536	0.13569	0.03552	0.01625	0.0072	2e-05
2013.6	0.05402	0.16914	0.22573	0.10824	0.19542	0.17146	0.15439	0.13725	0.03573	0.0163	0.00725	2e-05
2012.17	0.05392	0.16714	0.22035	0.10392	0.19315	0.17053	0.15511	0.13874	0.03585	0.01631	0.00727	1e-05
2010.74	0.0538	0.16538	0.21558	0.1	0.19099	0.16949	0.15578	0.14014	0.03587	0.01627	0.00723	1e-05
2009.31	0.05362	0.16378	0.21126	0.0964	0.18902	0.16851	0.15645	0.14145	0.03587	0.01623	0.00719	1e-05
2007.89	0.05342	0.1622	0.20739	0.09344	0.18731	0.16769	0.15699	0.14257	0.03587	0.01621	0.00716	1e-05
2006.46	0.05322	0.16072	0.20413	0.09112	0.1859	0.16699	0.15726	0.14338	0.03586	0.0162	0.00714	0
2005.03	0.05312	0.15956	0.20163	0.08944	0.1849	0.16638	0.15727	0.1438	0.03584	0.01619	0.00714	0
2003.61	0.0531	0.15878	0.19971	0.08816	0.1843	0.16597	0.15716	0.14392	0.0358	0.01617	0.00714	0
2002.18	0.05316	0.15826	0.19818	0.08728	0.18397	0.16582	0.15709	0.14395	0.03576	0.01616	0.00715	0
2000.75	0.05322	0.15794	0.19712	0.08664	0.18381	0.16592	0.15718	0.14408	0.03578	0.01619	0.00718	0
1999.33	0.0534	0.15786	0.19667	0.0864	0.18391	0.16624	0.15751	0.1444	0.03593	0.01632	0.00725	0
1997.9	0.05372	0.1581	0.19677	0.0864	0.18444	0.16681	0.15821	0.14493	0.03631	0.01659	0.00737	0
1996.47	0.05412	0.1586	0.19715	0.08656	0.18539	0.1676	0.15925	0.14568	0.03688	0.01696	0.00753	0
1995.04	0.05446	0.1592	0.1976	0.08648	0.18652	0.16851	0.16044	0.1467	0.03751	0.01734	0.00765	0
1993.62	0.05462	0.15982	0.19821	0.08648	0.18777	0.16965	0.16171	0.14816	0.03819	0.01768	0.00776	0
1992.19	0.05478	0.16054	0.19939	0.08688	0.18946	0.17149	0.16345	0.15044	0.03919	0.01817	0.00795	0
1990.76	0.05506	0.16158	0.20141	0.08808	0.19201	0.17439	0.16619	0.15372	0.04075	0.01898	0.00834	1e-05
1989.34	0.05556	0.16304	0.20394	0.09	0.19553	0.17823	0.17005	0.15775	0.04279	0.02006	0.00891	0
1987.91	0.05612	0.1649	0.20669	0.09232	0.19987	0.18274	0.17485	0.16228	0.04504	0.02125	0.00954	0
1986.48	0.05668	0.1671	0.20976	0.0948	0.20486	0.18776	0.18034	0.16747	0.04731	0.02241	0.01016	0
1985.05	0.05716	0.1694	0.21318	0.0972	0.21029	0.1932	0.18634	0.17359	0.04949	0.0235	0.01072	0
1983.63	0.05752	0.17156	0.21686	0.09944	0.21588	0.19891	0.19269	0.18063	0.05148	0.02449	0.0112	0
1982.2	0.05776	0.17354	0.22054	0.10168	0.22148	0.2048	0.19937	0.18836	0.05328	0.02535	0.01159	0
1980.77	0.05796	0.17542	0.22397	0.10392	0.22698	0.21087	0.20627	0.19648	0.05496	0.0261	0.01194	0
1979.35	0.05814	0.1773	0.22717	0.10632	0.23221	0.21692	0.21317	0.20461	0.05655	0.02673	0.01225	0
1977.92	0.05832	0.1791	0.23034	0.1088	0.23694	0.22261	0.21975	0.21226	0.05801	0.02723	0.01249	0
1976.49	0.0585	0.1808	0.23338	0.1112	0.24119	0.22765	0.22578	0.21907	0.05932	0.02765	0.01269	0
1975.07	0.05864	0.18238	0.23606	0.1136	0.24512	0.23206	0.23113	0.22505	0.06056	0.02808	0.01285	0
1973.64	0.05874	0.18384	0.23834	0.11624	0.24884	0.236	0.23582	0.23055	0.06177	0.02857	0.01303	0
1972.21	0.05876	0.18518	0.24051	0.1192	0.25229	0.23958	0.23991	0.23585	0.06295	0.02908	0.01323	0
1970.78	0.05868	0.1864	0.24278	0.12256	0.25528	0.24272	0.24338	0.24082	0.06397	0.02949	0.01338	0
1969.36	0.05848	0.18754	0.24506	0.126	0.25763	0.24525	0.24628	0.24525	0.06471	0.02967	0.01343	0
1967.93	0.05824	0.18872	0.24736	0.12968	0.25957	0.24741	0.24896	0.24927	0.06535	0.02975	0.01343	0
1966.5	0.05816	0.1901	0.25018	0.13408	0.26167	0.24974	0.25197	0.25335	0.06633	0.03003	0.01356	0
1965.08	0.0583	0.19158	0.2537	0.13944	0.2642	0.25237	0.25532	0.25764	0.06788	0.0307	0.01392	0
1963.65	0.05846	0.19284	0.25728	0.14512	0.26671	0.25465	0.25824	0.26166	0.06973	0.03157	0.0144	0
1962.22	0.05844	0.19366	0.26019	0.15024	0.26848	0.25589	0.25989	0.26466	0.07147	0.03239	0.01487	0
1960.79	0.0582	0.194	0.26214	0.15464	0.26909	0.25597	0.25999	0.26604	0.07292	0.03306	0.01526	1e-05
1959.37	0.0579	0.19392	0.2633	0.15856	0.26852	0.25497	0.25868	0.26545	0.07399	0.03359	0.01559	1e-05
1957.94	0.05762	0.1935	0.26378	0.16232	0.26702	0.25282	0.25601	0.26277	0.07452	0.03394	0.01584	1e-05
1956.51	0.05738	0.19274	0.26365	0.16616	0.26491	0.24946	0.25188	0.2581	0.07432	0.03399	0.01594	1e-05
1955.09	0.05716	0.19176	0.26314	0.1704	0.26235	0.24521	0.24634	0.25166	0.07339	0.03372	0.01589	1e-05
1953.66	0.05698	0.19074	0.26269	0.1748	0.25941	0.24062	0.23978	0.24373	0.07185	0.03319	0.01572	1e-05
1952.23	0.05686	0.18976	0.26282	0.17928	0.25624	0.23595	0.23275	0.23471	0.06977	0.03243	0.01543	1e-05
1950.81	0.0568	0.18882	0.26346	0.18336	0.25309	0.23108	0.22557	0.22504	0.06721	0.03145	0.01501	1e-05
1949.38	0.0567	0.18796	0.26419	0.18656	0.25011	0.22598	0.2183	0.21522	0.06432	0.03027	0.01445	1e-05
1947.95	0.05654	0.18722	0.26477	0.18856	0.24724	0.22085	0.21109	0.20572	0.0613	0.02895	0.01378	1e-05
1946.52	0.0563	0.18654	0.26528	0.18912	0.24427	0.2159	0.20419	0.19691	0.05828	0.02752	0.01303	0
1945.1	0.056	0.1859	0.26579	0.18824	0.24121	0.21115	0.1977	0.18881	0.05529	0.026	0.0122	0
1943.67	0.05568	0.18544	0.26637	0.18664	0.23852	0.20679	0.19167	0.18134	0.05246	0.02454	0.01139	0
1942.24	0.05556	0.18548	0.26749	0.18552	0.23695	0.20346	0.18653	0.17466	0.05019	0.02346	0.01083	0
1940.82	0.05568	0.18602	0.26925	0.18536	0.23679	0.20165	0.18285	0.16923	0.0488	0.02298	0.01064	0
1939.39	0.05588	0.18646	0.27107	0.18536	0.23736	0.20079	0.18033	0.16503	0.04804	0.02286	0.0107	0
1937.96	0.0559	0.18626	0.2721	0.18456	0.2377	0.19981	0.1781	0.16151	0.04735	0.02272	0.01073	0
1936.53	0.05574	0.1853	0.27203	0.18272	0.2374	0.19823	0.17567	0.15828	0.0465	0.02238	0.0106	0
1935.11	0.05554	0.18392	0.27107	0.18032	0.2365	0.19626	0.17316	0.15534	0.04558	0.02195	0.0104	0
1933.68	0.05534	0.18236	0.26944	0.17768	0.23511	0.19422	0.17074	0.15272	0.04473	0.02154	0.0102	0
1932.25	0.05508	0.1807	0.26704	0.1748	0.23332	0.19231	0.16845	0.15033	0.04398	0.02119	0.01004	0
1930.83	0.0547	0.17884	0.26403	0.17168	0.23124	0.19053	0.16633	0.14812	0.04334	0.02091	0.00992	0
1929.4	0.05426	0.17674	0.26058	0.16816	0.22894	0.18883	0.16445	0.14615	0.04278	0.0207	0.00982	0
1927.97	0.0538	0.17446	0.25686	0.16432	0.22643	0.18707	0.16278	0.1445	0.04223	0.02052	0.00972	0
1926.54	0.05332	0.17204	0.25283	0.16008	0.2236	0.18511	0.16106	0.14304	0.04154	0.02022	0.00955	0
1925.12	0.05268	0.16942	0.24832	0.15536	0.22031	0.18269	0.15899	0.14153	0.04058	0.01969	0.00924	0
1923.69	0.052	0.1667	0.24374	0.15056	0.21691	0.17991	0.15669	0.13998	0.0395	0.01904	0.00886	0
1922.26	0.0515	0.16428	0.23984	0.14656	0.21416	0.17739	0.15472	0.1387	0.03868	0.01859	0.0086	0
1920.84	0.05122	0.16224	0.23667	0.14336	0.21214	0.17551	0.15333	0.13783	0.03823	0.01843	0.00852	0
1919.41	0.05096	0.16022	0.23347	0.1404	0.21	0.17387	0.1521	0.1371	0.0379	0.01836	0.00847	0
1917.98	0.05068	0.1581	0.23005	0.1376	0.20744	0.17219	0.15088	0.13638	0.03764	0.0183	0.00844	0
1916.56	0.05054	0.15628	0.22717	0.13576	0.20518	0.17083	0.15003	0.13594	0.03771	0.0184	0.00855	0
1915.13	0.05062	0.15484	0.22512	0.1348	0.20349	0.16988	0.14961	0.1358	0.03807	0.01868	0.00878	0
1913.7	0.05064	0.15332	0.22298	0.13352	0.20156	0.16876	0.14905	0.13548	0.03826	0.01887	0.00893	0
1912.27	0.0504	0.15134	0.22013	0.13096	0.19873	0.16701	0.14783	0.13464	0.03797	0.01875	0.00885	0
1910.85	0.04998	0.149	0.21664	0.12776	0.19529	0.16471	0.14603	0.1334	0.03732	0.01839	0.0086	0
1909.42	0.04956	0.14682	0.21328	0.12496	0.19206	0.16235	0.14416	0.13219	0.03672	0.01803	0.00837	0
1907.99	0.04926	0.14504	0.21056	0.1232	0.18961	0.16034	0.14272	0.13134	0.03645	0.01789	0.0083	0
1906.57	0.04912	0.14358	0.20845	0.12224	0.18778	0.15868	0.14168	0.13079	0.03644	0.01794	0.00838	0
1905.14	0.04906	0.1422	0.2064	0.12144	0.18604	0.15705	0.14066	0.13017	0.03642	0.01802	0.00848	0
1903.71	0.04902	0.14072	0.20422	0.1204	0.18402	0.15525	0.13934	0.12922	0.03621	0.01797	0.0085	0
1902.28	0.0489	0.13916	0.20189	0.1192	0.18177	0.15335	0.13769	0.12794	0.03584	0.01783	0.00845	0
1900.86	0.04874	0.13754	0.19949	0.11808	0.17948	0.1514	0.13584	0.12649	0.03538	0.01764	0.00838	0
1899.43	0.04854	0.13592	0.19696	0.11696	0.17725	0.14929	0.13395	0.12488	0.03481	0.01738	0.00827	0
1898	0.0483	0.13438	0.1943	0.11576	0.17494	0.14694	0.13203	0.12298	0.03402	0.01699	0.00806	0
1896.58	0.04806	0.13294	0.19174	0.1144	0.17244	0.14448	0.13003	0.12076	0.033	0.01645	0.00776	0
1895.15	0.04782	0.13164	0.18966	0.1132	0.16996	0.14229	0.12809	0.11848	0.03195	0.01592	0.00746	0
1893.72	0.0476	0.1305	0.18819	0.11264	0.16781	0.14056	0.12636	0.11642	0.03106	0.01547	0.00722	0
1892.3	0.04734	0.12932	0.18678	0.11224	0.1659	0.13893	0.12459	0.11454	0.03019	0.01501	0.00697	0
1890.87	0.04698	0.12798	0.18502	0.11144	0.16405	0.13706	0.12253	0.11267	0.02918	0.0144	0.00663	0
1889.44	0.04668	0.12666	0.1833	0.11056	0.16261	0.1353	0.12058	0.11096	0.02825	0.01384	0.00633	0
1888.01	0.04664	0.12578	0.18234	0.11056	0.16202	0.13432	0.11937	0.10972	0.02774	0.01361	0.00626	0
1886.59	0.04684	0.12532	0.18198	0.11128	0.16191	0.13401	0.11883	0.10892	0.02759	0.01367	0.00634	0
1885.16	0.047	0.1249	0.18157	0.11208	0.16152	0.13368	0.11831	0.10819	0.02746	0.01374	0.00641	0
1883.73	0.04698	0.12426	0.18083	0.1124	0.16062	0.133	0.11754	0.10732	0.02722	0.01369	0.00641	0
1882.31	0.0468	0.12346	0.17984	0.11224	0.15951	0.13208	0.11662	0.10633	0.02697	0.0136	0.00638	0
1880.88	0.04662	0.12264	0.17859	0.11176	0.15842	0.13108	0.11568	0.10536	0.02674	0.01351	0.00636	0
1879.45	0.04652	0.12184	0.17709	0.11096	0.15735	0.13008	0.11483	0.1045	0.0265	0.01342	0.00631	0
1878.02	0.04648	0.121	0.17549	0.10984	0.15622	0.1291	0.1141	0.10375	0.02623	0.01332	0.00626	0
1876.6	0.04646	0.12004	0.17389	0.10848	0.155	0.12809	0.11343	0.10302	0.02598	0.01322	0.00622	0
1875.17	0.04638	0.11894	0.17216	0.1068	0.15366	0.12698	0.11264	0.10222	0.0257	0.01308	0.00616	0
1873.74	0.0462	0.1177	0.17008	0.10464	0.15203	0.12564	0.11154	0.10135	0.02529	0.01284	0.00602	0
1872.32	0.04582	0.1161	0.16726	0.10184	0.14977	0.1238	0.10988	0.10028	0.02453	0.01235	0.00569	0
1870.89	0.04514	0.11396	0.16342	0.09776	0.14661	0.12118	0.10753	0.09883	0.02329	0.01152	0.00513	1e-05
1869.46	0.04432	0.11142	0.15888	0.09288	0.14298	0.11816	0.10494	0.09714	0.02189	0.01059	0.0045	3e-05
1868.03	0.04384	0.10932	0.15514	0.08912	0.14037	0.11607	0.1033	0.09595	0.02109	0.01008	0.00417	4e-05
1866.61	0.04408	0.10836	0.15354	0.0876	0.1398	0.11582	0.10328	0.09585	0.0213	0.01028	0.00432	3e-05
1865.18	0.04476	0.1082	0.15331	0.08752	0.1403	0.11657	0.10408	0.09633	0.02205	0.01085	0.00474	1e-05
1863.75	0.04532	0.108	0.15286	0.0872	0.14036	0.11697	0.10456	0.09657	0.02261	0.01128	0.00509	0
1862.33	0.04548	0.10732	0.1513	0.08584	0.13937	0.11652	0.10429	0.09625	0.02269	0.01138	0.00521	0
1860.9	0.04532	0.1062	0.14874	0.08376	0.13759	0.11544	0.1035	0.09558	0.02243	0.01127	0.00517	0
1859.47	0.04516	0.10488	0.14582	0.08144	0.13557	0.11414	0.10255	0.09486	0.02206	0.01111	0.00507	0
1858.05	0.0451	0.10358	0.14301	0.07928	0.13367	0.11284	0.10169	0.09424	0.02174	0.01097	0.005	0
1856.62	0.04512	0.10242	0.14035	0.07744	0.13192	0.11158	0.10096	0.09369	0.02148	0.01086	0.00496	0
1855.19	0.04506	0.10134	0.13779	0.07568	0.13016	0.11031	0.10027	0.09311	0.02126	0.01075	0.00492	0
1853.76	0.04494	0.10026	0.13526	0.07392	0.12825	0.109	0.09953	0.09248	0.02101	0.01062	0.00486	0
1852.34	0.04482	0.09916	0.13283	0.07208	0.12617	0.10758	0.09865	0.09185	0.02069	0.01044	0.00476	0
1850.91	0.04468	0.09802	0.1305	0.07032	0.12396	0.10595	0.09759	0.09122	0.0202	0.01018	0.00459	0
1849.48	0.04446	0.09682	0.1281	0.0684	0.12164	0.10398	0.09632	0.09044	0.01949	0.00978	0.00434	1e-05
1848.06	0.04408	0.09544	0.12538	0.06624	0.1192	0.10171	0.09481	0.08937	0.0186	0.00925	0.004	1e-05
1846.63	0.04356	0.0938	0.12221	0.06376	0.11653	0.09923	0.09306	0.08809	0.0176	0.00861	0.0036	3e-05
1845.2	0.043	0.09208	0.11885	0.06136	0.11376	0.09677	0.09128	0.08689	0.0167	0.00802	0.00322	4e-05
1843.77	0.04276	0.09088	0.11632	0.06008	0.11169	0.0951	0.09017	0.08627	0.01631	0.0078	0.0031	5e-05
1842.35	0.043	0.09064	0.11549	0.06048	0.11104	0.09487	0.09026	0.08644	0.01668	0.00812	0.00334	3e-05
1840.92	0.04346	0.0909	0.11571	0.06184	0.11121	0.09545	0.09093	0.08688	0.01737	0.00865	0.00374	2e-05
1839.49	0.04374	0.09098	0.11581	0.0628	0.11117	0.09577	0.09128	0.08701	0.01778	0.00898	0.004	1e-05
1838.07	0.04382	0.0907	0.11549	0.06312	0.11061	0.09553	0.09107	0.08676	0.01777	0.00901	0.00404	1e-05
1836.64	0.04388	0.09026	0.11501	0.06336	0.10988	0.09505	0.09062	0.08642	0.01759	0.00893	0.00399	1e-05
1835.21	0.04396	0.08988	0.11456	0.06368	0.10928	0.0946	0.09021	0.08617	0.01748	0.00889	0.00396	1e-05
1833.79	0.04396	0.08934	0.11382	0.06368	0.10849	0.0939	0.08964	0.08584	0.01728	0.00876	0.00388	1e-05
1832.36	0.04366	0.0884	0.11245	0.0628	0.10698	0.09251	0.08853	0.08519	0.0167	0.00835	0.00362	1e-05
1830.93	0.0431	0.08718	0.11062	0.06112	0.10489	0.09057	0.08693	0.08427	0.01579	0.00772	0.00321	3e-05
1829.5	0.04264	0.08638	0.10938	0.06	0.10329	0.08904	0.08567	0.08351	0.01508	0.00725	0.00291	4e-05
1828.08	0.04256	0.08644	0.10941	0.06024	0.1029	0.08866	0.08539	0.08319	0.01495	0.00719	0.00289	4e-05
1826.65	0.04266	0.08688	0.11005	0.06128	0.10309	0.08892	0.08567	0.0831	0.01515	0.00737	0.00302	3e-05
1825.22	0.04274	0.08714	0.11062	0.06248	0.10316	0.08917	0.08586	0.08298	0.01536	0.00755	0.00315	3e-05
1823.8	0.04288	0.08728	0.11133	0.06384	0.10335	0.08955	0.08602	0.08297	0.01565	0.0078	0.00333	2e-05
1822.37	0.04316	0.08752	0.11235	0.06552	0.1039	0.0902	0.08638	0.08322	0.01609	0.00815	0.00357	1e-05
1820.94	0.04342	0.08776	0.11338	0.06696	0.1044	0.09075	0.08672	0.08352	0.01647	0.00845	0.00379	0
1819.51	0.04352	0.08778	0.11389	0.06776	0.10445	0.09082	0.08674	0.08358	0.01659	0.00855	0.00387	0
1818.09	0.0435	0.08766	0.11392	0.06816	0.10418	0.09051	0.08649	0.08335	0.0165	0.0085	0.00387	0
1816.66	0.0435	0.08756	0.11386	0.06848	0.1039	0.09006	0.08622	0.08301	0.01638	0.00844	0.00384	0
1815.23	0.04348	0.08744	0.11373	0.06856	0.10355	0.08951	0.08593	0.08266	0.01624	0.00838	0.0038	0
1813.81	0.04334	0.08708	0.11331	0.06816	0.10283	0.08863	0.08541	0.08219	0.01594	0.00819	0.00367	0
1812.38	0.04302	0.08638	0.11242	0.06712	0.10173	0.08741	0.0846	0.08156	0.01544	0.00785	0.00344	1e-05
1810.95	0.04266	0.0857	0.11139	0.06608	0.10073	0.08632	0.08384	0.08099	0.01497	0.00754	0.00323	1e-05
1809.53	0.04252	0.08544	0.11085	0.06584	0.10032	0.08594	0.08357	0.08077	0.01484	0.00746	0.00319	1e-05
1808.1	0.04264	0.08556	0.11085	0.0664	0.10046	0.08622	0.08379	0.0809	0.01503	0.00762	0.00332	1e-05
1806.67	0.04282	0.08568	0.11082	0.06696	0.10062	0.08657	0.08402	0.08105	0.01528	0.00782	0.00346	1e-05
1805.24	0.0429	0.08546	0.11027	0.06688	0.10029	0.08649	0.08385	0.08092	0.01529	0.00785	0.00349	1e-05
1803.82	0.04276	0.08484	0.10912	0.06592	0.09919	0.08573	0.08309	0.08043	0.01491	0.00761	0.00333	1e-05
1802.39	0.04246	0.08384	0.10742	0.06424	0.09746	0.08444	0.08194	0.07972	0.01426	0.00718	0.00302	2e-05
1800.96	0.04216	0.08276	0.10563	0.06248	0.09582	0.08323	0.08092	0.07915	0.01367	0.0068	0.00276	3e-05
1799.54	0.04202	0.08198	0.10426	0.0612	0.09493	0.0826	0.08047	0.07897	0.01344	0.00667	0.00268	3e-05
1798.11	0.04202	0.08158	0.10349	0.06048	0.09467	0.08241	0.08041	0.07895	0.0135	0.00675	0.00275	3e-05
1796.68	0.04196	0.08122	0.10288	0.05968	0.09432	0.08206	0.0802	0.07873	0.01352	0.00677	0.00278	2e-05
1795.25	0.04172	0.08056	0.10173	0.05824	0.09336	0.08114	0.07949	0.07814	0.01321	0.00655	0.00264	3e-05
1793.83	0.04128	0.07946	0.09974	0.056	0.0917	0.07967	0.07833	0.07729	0.0126	0.00612	0.00236	5e-05
1792.4	0.04092	0.07842	0.09763	0.05384	0.09012	0.07832	0.07732	0.07662	0.01208	0.00578	0.00213	7e-05
1790.97	0.04108	0.07816	0.09674	0.05328	0.08986	0.07823	0.07746	0.07674	0.01224	0.00591	0.00221	6e-05
1789.55	0.0417	0.07872	0.09722	0.05416	0.0909	0.07938	0.07869	0.07755	0.01304	0.00649	0.00259	3e-05
1788.12	0.0423	0.07932	0.09773	0.0552	0.09187	0.08056	0.07986	0.07827	0.01383	0.00704	0.00297	1e-05
1786.69	0.04256	0.07946	0.09741	0.05528	0.09193	0.08089	0.0802	0.07842	0.01411	0.00723	0.00313	1e-05
1785.26	0.0425	0.07908	0.09635	0.0544	0.09129	0.08045	0.07983	0.07808	0.01395	0.00713	0.00307	1e-05
1783.84	0.04232	0.07842	0.0951	0.05328	0.0905	0.07973	0.0792	0.07764	0.01363	0.00694	0.00295	1e-05
1782.41	0.04214	0.07768	0.09395	0.052	0.0897	0.079	0.07855	0.07732	0.01332	0.00674	0.00282	2e-05
1780.98	0.04202	0.077	0.09299	0.0508	0.08893	0.07837	0.07799	0.07716	0.01309	0.00658	0.00272	2e-05
1779.56	0.04202	0.0766	0.09229	0.05008	0.08838	0.07798	0.07774	0.07715	0.01305	0.00654	0.0027	2e-05
1778.13	0.04208	0.07646	0.09171	0.04976	0.08804	0.07783	0.07779	0.07718	0.01315	0.0066	0.00274	2e-05
1776.7	0.04192	0.07618	0.09072	0.04904	0.08742	0.07745	0.07766	0.07694	0.01306	0.00653	0.0027	2e-05
1775.28	0.04136	0.07538	0.0889	0.0472	0.08605	0.07631	0.07685	0.07621	0.01248	0.00612	0.00243	3e-05
1773.85	0.04048	0.074	0.08637	0.0444	0.08402	0.07443	0.07531	0.07512	0.01148	0.00544	0.002	6e-05
1772.42	0.03972	0.0726	0.08413	0.04176	0.08221	0.07266	0.07376	0.07423	0.01061	0.00487	0.00165	0.0001
1770.99	0.03962	0.0721	0.08346	0.04072	0.08171	0.07218	0.07327	0.07412	0.01044	0.00477	0.0016	0.0001
1769.57	0.04012	0.07264	0.08419	0.04144	0.0825	0.073	0.07401	0.07464	0.01097	0.00514	0.00183	8e-05
1768.14	0.0408	0.07362	0.08525	0.04296	0.08369	0.07429	0.07526	0.07531	0.01176	0.00572	0.00218	4e-05
1766.71	0.0414	0.07448	0.08608	0.04448	0.0847	0.07544	0.07642	0.07594	0.01247	0.00626	0.00253	2e-05
1765.29	0.0418	0.07484	0.08637	0.0452	0.08515	0.07603	0.07706	0.07635	0.01288	0.00658	0.00274	1e-05
1763.86	0.04182	0.07456	0.08592	0.0448	0.08479	0.07572	0.07687	0.07636	0.0128	0.00652	0.00271	1e-05
1762.43	0.04154	0.07388	0.08486	0.04368	0.08388	0.07476	0.07604	0.07605	0.01237	0.0062	0.00251	2e-05
1761	0.04132	0.07342	0.08394	0.04288	0.08317	0.07404	0.07539	0.07586	0.01206	0.00599	0.00237	3e-05
1759.58	0.0413	0.07336	0.08355	0.04264	0.08294	0.07395	0.07529	0.0759	0.01204	0.00599	0.00236	3e-05
1758.15	0.04132	0.07336	0.08336	0.04264	0.08281	0.07404	0.0754	0.0759	0.01212	0.00604	0.00239	3e-05
1756.72	0.04134	0.07324	0.0831	0.04256	0.0827	0.07407	0.07551	0.07586	0.0122	0.00607	0.00242	2e-05
1755.3	0.04144	0.07314	0.08291	0.04248	0.08272	0.07414	0.07564	0.07591	0.0123	0.00611	0.00247	2e-05
1753.87	0.04138	0.07288	0.0824	0.04216	0.0824	0.07383	0.07538	0.07578	0.01215	0.006	0.00241	2e-05
1752.44	0.04088	0.07208	0.08106	0.0408	0.08103	0.07253	0.07419	0.075	0.01146	0.0055	0.0021	4e-05
1751.02	0.03998	0.0707	0.07882	0.0384	0.07871	0.07037	0.07218	0.07358	0.01037	0.00474	0.00163	9e-05
1749.59	0.03918	0.06942	0.07677	0.03624	0.07669	0.06854	0.07049	0.07238	0.00954	0.0042	0.00131	0.00013
1748.16	0.03904	0.06896	0.07613	0.03552	0.07621	0.06817	0.07018	0.07223	0.00945	0.00417	0.00129	0.00012
1746.73	0.0394	0.06924	0.07661	0.036	0.07693	0.06891	0.07098	0.07288	0.00985	0.00448	0.00147	9e-05
1745.31	0.03984	0.06972	0.07731	0.0368	0.07782	0.0698	0.07191	0.07359	0.01032	0.00481	0.00166	7e-05
1743.88	0.0401	0.07002	0.07773	0.03728	0.07833	0.07036	0.07244	0.07404	0.0106	0.005	0.00178	6e-05
1742.45	0.04012	0.0701	0.07779	0.03736	0.07848	0.07058	0.0726	0.07424	0.01069	0.00505	0.00182	5e-05
1741.03	0.04002	0.07002	0.07773	0.03728	0.0785	0.07063	0.07265	0.07432	0.01068	0.00503	0.00182	5e-05
1739.6	0.03998	0.07002	0.07786	0.03736	0.07863	0.07071	0.07284	0.07439	0.01072	0.00506	0.00185	5e-05
1738.17	0.04012	0.07014	0.07808	0.0376	0.07875	0.07075	0.07306	0.07447	0.01079	0.0051	0.00189	5e-05
1736.74	0.04008	0.06998	0.07782	0.0372	0.07826	0.07014	0.07271	0.07423	0.01052	0.00493	0.00178	6e-05
1735.32	0.03958	0.06914	0.07645	0.03552	0.07667	0.06841	0.07133	0.0733	0.0097	0.00439	0.00144	9e-05
1733.89	0.03888	0.06806	0.07456	0.03344	0.07481	0.06648	0.06967	0.07205	0.00883	0.00382	0.0011	0.00015
1732.46	0.03884	0.06794	0.07418	0.03328	0.07461	0.06642	0.06956	0.07175	0.00881	0.00384	0.0011	0.00014
1731.04	0.03956	0.06886	0.07552	0.03504	0.07618	0.06824	0.07111	0.07267	0.00962	0.00441	0.00142	9e-05
1729.61	0.04046	0.07002	0.07728	0.03728	0.07816	0.07039	0.07302	0.07398	0.01066	0.00514	0.00187	4e-05
1728.18	0.04124	0.07098	0.07872	0.03928	0.07989	0.07215	0.07464	0.07519	0.01159	0.00579	0.0023	1e-05
1726.76	0.0418	0.07162	0.07968	0.04048	0.08099	0.07323	0.07566	0.07602	0.01226	0.00625	0.00262	0
1725.33	0.04202	0.0718	0.07994	0.04072	0.08124	0.07351	0.07592	0.07633	0.01251	0.0064	0.00272	0
1723.9	0.0419	0.07168	0.07965	0.04032	0.08089	0.07328	0.07562	0.07625	0.01241	0.00631	0.00266	0
1722.47	0.04156	0.07132	0.0791	0.03968	0.08033	0.07282	0.07504	0.07596	0.01212	0.00609	0.0025	1e-05
1721.05	0.04092	0.07058	0.07811	0.03856	0.07931	0.07182	0.07399	0.0753	0.0115	0.00565	0.0022	2e-05
1719.62	0.0398	0.0691	0.07606	0.03632	0.07721	0.06966	0.072	0.07396	0.0103	0.00481	0.00167	5e-05
1718.19	0.0383	0.06698	0.07299	0.0332	0.07409	0.06651	0.06919	0.07197	0.00873	0.00376	0.00106	0.00012
1716.77	0.03728	0.06558	0.07072	0.03096	0.07178	0.06428	0.0673	0.07048	0.00776	0.00313	0.00074	0.00019
1715.34	0.03764	0.06616	0.0713	0.03152	0.07226	0.06484	0.068	0.07072	0.00806	0.00332	0.00085	0.00016
1713.91	0.03882	0.06792	0.07373	0.034	0.07464	0.06717	0.07032	0.07217	0.00923	0.00408	0.00129	8e-05
1712.48	0.03992	0.0695	0.076	0.03656	0.07703	0.06944	0.07248	0.07368	0.01042	0.00492	0.00178	3e-05
1711.06	0.04058	0.07034	0.07722	0.03832	0.0785	0.07088	0.07375	0.0747	0.01117	0.00547	0.00211	1e-05
1709.63	0.04074	0.07042	0.07728	0.03872	0.07878	0.07128	0.074	0.07504	0.01129	0.00558	0.00217	1e-05
1708.2	0.04044	0.06988	0.07632	0.03768	0.07792	0.07061	0.0733	0.07468	0.01084	0.00527	0.00197	2e-05
1706.78	0.03984	0.06902	0.07491	0.03592	0.07639	0.06923	0.072	0.07385	0.01009	0.00474	0.00164	4e-05
1705.35	0.0393	0.06836	0.07379	0.0344	0.07512	0.068	0.0709	0.0731	0.00947	0.00431	0.0014	6e-05
1703.92	0.03904	0.06802	0.07322	0.03368	0.07449	0.06737	0.07036	0.07274	0.00911	0.00405	0.00126	8e-05
1702.49	0.0387	0.06748	0.07232	0.03288	0.07372	0.06668	0.06974	0.07235	0.00863	0.0037	0.00106	0.00011
1701.07	0.03796	0.06632	0.07046	0.0312	0.07203	0.06515	0.0683	0.07145	0.00777	0.00311	0.00075	0.00016
1699.64	0.03704	0.06496	0.06832	0.02936	0.07013	0.06338	0.06652	0.07042	0.00699	0.00259	0.00051	0.00023
1698.21	0.03672	0.06444	0.06752	0.02888	0.06955	0.06284	0.06576	0.07018	0.00686	0.00251	0.00048	0.00023
1696.79	0.03714	0.065	0.06835	0.03	0.07057	0.06382	0.0665	0.07095	0.00731	0.00281	0.00063	0.00018
1695.36	0.0382	0.06646	0.07059	0.0324	0.07286	0.06598	0.06863	0.07245	0.00826	0.00345	0.00095	0.00011
1693.93	0.03952	0.06832	0.07347	0.03536	0.07569	0.06856	0.07141	0.07412	0.00955	0.00433	0.00145	5e-05
1692.51	0.04044	0.0697	0.07555	0.03744	0.07766	0.07025	0.07336	0.07518	0.01054	0.00504	0.00189	2e-05
1691.08	0.04066	0.07008	0.0761	0.03784	0.07806	0.07052	0.07377	0.07531	0.0108	0.00523	0.00201	1e-05
1689.65	0.0404	0.06972	0.07546	0.0372	0.07727	0.0698	0.07301	0.07473	0.01047	0.00501	0.00186	2e-05
1688.22	0.03992	0.06892	0.07421	0.036	0.07592	0.06866	0.07173	0.07381	0.00987	0.00459	0.00159	3e-05
1686.8	0.0392	0.0677	0.07242	0.03408	0.07404	0.06699	0.07004	0.07263	0.00895	0.00395	0.00121	6e-05
1685.37	0.03804	0.0659	0.06992	0.03128	0.07136	0.06449	0.06774	0.07115	0.00767	0.00309	0.00075	0.00013
1683.94	0.03702	0.0645	0.06813	0.02904	0.06927	0.06245	0.06602	0.07018	0.00676	0.00251	0.00048	0.0002
1682.52	0.0373	0.06506	0.06922	0.03008	0.07009	0.06322	0.06687	0.07092	0.00713	0.00275	0.0006	0.00017
1681.09	0.03848	0.06688	0.07194	0.03312	0.07279	0.06586	0.0693	0.0726	0.00837	0.00358	0.00103	9e-05
1679.66	0.03954	0.06842	0.07408	0.03576	0.07513	0.06816	0.07133	0.07396	0.00949	0.00436	0.00148	4e-05
1678.23	0.04014	0.0692	0.07507	0.03704	0.07628	0.06931	0.07234	0.07466	0.01	0.00474	0.0017	2e-05
1676.81	0.04028	0.06924	0.07514	0.0372	0.0762	0.06934	0.07242	0.0747	0.00991	0.00469	0.00166	2e-05
1675.38	0.04012	0.0689	0.07469	0.03656	0.07536	0.06877	0.072	0.07433	0.00953	0.00443	0.00149	3e-05
1673.95	0.03994	0.06856	0.0744	0.036	0.0746	0.0683	0.07167	0.07398	0.00927	0.00424	0.00137	3e-05
1672.53	0.0398	0.06828	0.07424	0.03552	0.07408	0.06793	0.07141	0.07374	0.00907	0.0041	0.00128	4e-05
1671.1	0.03954	0.06794	0.07379	0.03472	0.07345	0.06725	0.07085	0.0734	0.00868	0.00384	0.00114	5e-05
1669.67	0.03942	0.06792	0.07357	0.03448	0.07322	0.06688	0.07052	0.07331	0.00841	0.00367	0.00105	6e-05
1668.25	0.03998	0.06882	0.07456	0.03592	0.07444	0.06797	0.07156	0.07414	0.00884	0.00398	0.00123	4e-05
1666.82	0.04092	0.07016	0.07635	0.03832	0.07645	0.06994	0.07345	0.07547	0.00978	0.00465	0.00164	1e-05
1665.39	0.04152	0.07102	0.07757	0.03968	0.07763	0.07114	0.07464	0.07624	0.0104	0.00509	0.00192	0
1663.96	0.04154	0.07118	0.0777	0.03976	0.07748	0.07105	0.07461	0.07619	0.01039	0.00507	0.00191	0
1662.54	0.04134	0.07114	0.07757	0.0396	0.07691	0.07055	0.07416	0.07591	0.01019	0.00491	0.00181	0
1661.11	0.04154	0.0716	0.07818	0.0404	0.07715	0.07083	0.07447	0.07615	0.0104	0.00503	0.00189	0
1659.68	0.04206	0.07236	0.07926	0.042	0.07807	0.07176	0.07543	0.0768	0.01089	0.00538	0.00211	0
1658.26	0.04236	0.0727	0.07981	0.04296	0.07847	0.07217	0.07586	0.07711	0.01103	0.00548	0.00218	0
1656.83	0.04198	0.07212	0.07904	0.04224	0.07743	0.07117	0.07491	0.07657	0.01035	0.005	0.00187	0
1655.4	0.04076	0.07046	0.0767	0.03952	0.07463	0.06839	0.07231	0.07498	0.00873	0.00389	0.0012	3e-05
1653.97	0.03902	0.06818	0.07338	0.03568	0.07085	0.06453	0.06879	0.07274	0.00678	0.00263	0.00054	0.00011
1652.55	0.03836	0.06744	0.07229	0.0344	0.06952	0.06305	0.06747	0.07181	0.00605	0.00217	0.00034	0.00016
1651.12	0.0394	0.06884	0.07453	0.03696	0.07165	0.06519	0.06934	0.07302	0.0069	0.00269	0.00059	0.0001
1649.69	0.04026	0.06986	0.07616	0.03896	0.0731	0.06681	0.07074	0.074	0.00768	0.00318	0.00085	6e-05
1648.27	0.04024	0.06984	0.07597	0.03912	0.07256	0.06646	0.07049	0.07389	0.00758	0.00311	0.00082	6e-05
1646.84	0.04018	0.07	0.07574	0.03936	0.07194	0.06587	0.07028	0.07372	0.00735	0.00297	0.00073	7e-05
1645.41	0.04112	0.0717	0.07792	0.04232	0.07368	0.06743	0.07212	0.0748	0.008	0.00342	0.00095	4e-05
1643.98	0.0427	0.07418	0.0816	0.0468	0.07688	0.07043	0.07507	0.07661	0.00937	0.00439	0.0015	0
1642.56	0.04394	0.07604	0.08451	0.05056	0.0792	0.07273	0.07713	0.07789	0.01047	0.00519	0.002	0
1641.13	0.04454	0.07696	0.08595	0.05272	0.08001	0.0736	0.07776	0.07829	0.01085	0.00546	0.00219	0
1639.7	0.0445	0.07702	0.08598	0.0532	0.07944	0.07312	0.07708	0.07792	0.01048	0.00516	0.00202	0
1638.28	0.04384	0.07622	0.0847	0.052	0.07761	0.07138	0.07522	0.07681	0.00944	0.00439	0.00156	0
1636.85	0.0429	0.07504	0.08288	0.05008	0.07507	0.06901	0.07278	0.07527	0.00816	0.00351	0.00105	1e-05
1635.42	0.0427	0.07502	0.08294	0.0508	0.07394	0.06801	0.07175	0.07449	0.00763	0.00318	0.00087	2e-05
1634	0.04394	0.07704	0.08618	0.05592	0.07577	0.06981	0.07349	0.07538	0.00847	0.00377	0.0012	0
1632.57	0.04562	0.07944	0.09011	0.06224	0.0785	0.07241	0.07602	0.07672	0.00982	0.00473	0.0018	1e-05
1631.14	0.0467	0.0809	0.09248	0.06656	0.07996	0.07377	0.07735	0.07726	0.01061	0.00531	0.00218	3e-05
1629.71	0.047	0.08138	0.09331	0.06896	0.07983	0.07356	0.07722	0.07681	0.01059	0.0053	0.00218	3e-05
1628.29	0.04684	0.08136	0.09334	0.07048	0.07875	0.07243	0.07617	0.07574	0.01013	0.005	0.002	3e-05
1626.86	0.04652	0.08114	0.09338	0.072	0.0775	0.07112	0.07485	0.07454	0.00962	0.00468	0.00181	3e-05
1625.43	0.04616	0.08062	0.09334	0.07352	0.07625	0.06977	0.07343	0.07333	0.00913	0.0044	0.00165	2e-05
1624.01	0.04578	0.07986	0.09309	0.07504	0.07493	0.06833	0.07189	0.07201	0.00867	0.00413	0.0015	2e-05
1622.58	0.04562	0.07942	0.09309	0.07728	0.07408	0.06736	0.07082	0.07085	0.00851	0.00406	0.00147	3e-05
1621.15	0.04576	0.07956	0.09354	0.08032	0.07391	0.06721	0.07051	0.07011	0.0087	0.00421	0.00158	5e-05
1619.72	0.04574	0.07956	0.09347	0.08216	0.07352	0.06699	0.0702	0.06941	0.00876	0.00427	0.00163	6e-05
1618.3	0.04522	0.07876	0.09222	0.08168	0.07209	0.06589	0.06908	0.06827	0.00832	0.00397	0.00146	5e-05
1616.87	0.04452	0.07762	0.09069	0.08032	0.07036	0.06448	0.06764	0.06699	0.00774	0.00359	0.00125	4e-05
1615.44	0.04448	0.0774	0.09062	0.08072	0.07018	0.06433	0.06732	0.06658	0.00777	0.00364	0.0013	5e-05
1614.02	0.045	0.07814	0.09194	0.0828	0.07161	0.06547	0.06818	0.06712	0.00841	0.00412	0.0016	8e-05
1612.59	0.0454	0.0787	0.09283	0.08376	0.07295	0.0665	0.06897	0.06776	0.00899	0.00455	0.00187	0.00011
1611.16	0.04538	0.07852	0.09248	0.0824	0.07338	0.06678	0.06909	0.06808	0.00914	0.00466	0.00192	0.00011
1609.74	0.0451	0.07788	0.0913	0.07936	0.07323	0.06662	0.06886	0.06825	0.00903	0.00457	0.00184	0.0001
1608.31	0.04482	0.07724	0.09014	0.07616	0.07322	0.06663	0.06884	0.06863	0.00895	0.00451	0.00179	8e-05
1606.88	0.04466	0.07686	0.08938	0.07376	0.07369	0.06709	0.06928	0.06933	0.00905	0.00458	0.00183	8e-05
1605.45	0.04452	0.07658	0.08886	0.072	0.07428	0.06773	0.06997	0.07014	0.00923	0.00471	0.00191	7e-05
1604.03	0.04426	0.0762	0.08829	0.07008	0.07458	0.06815	0.07058	0.07078	0.00933	0.00479	0.00195	7e-05
1602.6	0.04388	0.0758	0.08765	0.06784	0.07461	0.06834	0.071	0.07125	0.00938	0.00483	0.00196	7e-05
1601.17	0.0435	0.0755	0.08704	0.06552	0.07466	0.06854	0.07136	0.07163	0.00948	0.00489	0.002	7e-05
1599.75	0.0432	0.07524	0.08662	0.06336	0.07482	0.06883	0.07169	0.07195	0.00963	0.00497	0.00207	7e-05
1598.32	0.04284	0.07488	0.08611	0.0612	0.07487	0.06896	0.07186	0.0721	0.0097	0.005	0.00209	6e-05
1596.89	0.04238	0.0743	0.08522	0.05896	0.07472	0.06871	0.07175	0.07206	0.00963	0.00492	0.00203	6e-05
1595.46	0.0419	0.07366	0.08419	0.05672	0.07451	0.06823	0.07152	0.07193	0.0095	0.0048	0.00195	5e-05
1594.04	0.04158	0.07314	0.08339	0.0548	0.07441	0.0679	0.07141	0.07191	0.00943	0.00474	0.00191	4e-05
1592.61	0.04144	0.07282	0.0831	0.05352	0.07442	0.0679	0.07148	0.07207	0.00946	0.00476	0.00194	4e-05
1591.18	0.04136	0.0726	0.08307	0.0528	0.07447	0.06806	0.07156	0.07232	0.00954	0.00482	0.00198	4e-05
1589.76	0.04126	0.07242	0.08304	0.05224	0.07455	0.06822	0.07158	0.07251	0.00962	0.00488	0.00202	5e-05
1588.33	0.04106	0.07232	0.08285	0.05184	0.07466	0.06837	0.07161	0.07261	0.00971	0.00494	0.00206	5e-05
1586.9	0.04084	0.0723	0.08246	0.05136	0.07472	0.0685	0.07169	0.07266	0.00978	0.005	0.00208	5e-05
1585.48	0.04062	0.0723	0.08205	0.0508	0.07469	0.06856	0.07172	0.07264	0.00978	0.00501	0.00207	6e-05
1584.05	0.04042	0.07224	0.08176	0.05024	0.07456	0.06851	0.07161	0.07259	0.00971	0.00496	0.00205	6e-05
1582.62	0.0402	0.07216	0.08157	0.0496	0.07438	0.06827	0.0714	0.07252	0.0096	0.00489	0.00201	5e-05
1581.19	0.03988	0.07194	0.08118	0.04872	0.07402	0.06774	0.07105	0.07235	0.00943	0.00475	0.00194	5e-05
1579.77	0.03926	0.07136	0.08026	0.0472	0.0731	0.06667	0.07026	0.07182	0.00899	0.00442	0.00174	3e-05
1578.34	0.03824	0.07022	0.0784	0.0448	0.07128	0.06491	0.06877	0.07073	0.00816	0.00383	0.00136	1e-05
1576.91	0.03702	0.06882	0.07635	0.04208	0.0691	0.06294	0.06701	0.06944	0.00723	0.0032	0.00098	0
1575.49	0.03642	0.0683	0.07597	0.0412	0.06832	0.06229	0.06642	0.06897	0.00693	0.00301	0.00087	0
1574.06	0.03668	0.0691	0.0775	0.04248	0.0694	0.06328	0.06731	0.06958	0.00738	0.00332	0.00105	1e-05
1572.63	0.037	0.06994	0.07878	0.0436	0.07042	0.06418	0.06807	0.07014	0.00775	0.00358	0.00121	1e-05
1571.2	0.03678	0.07	0.07862	0.04296	0.07012	0.06387	0.06765	0.06999	0.00751	0.00343	0.00112	1e-05
1569.78	0.03628	0.06968	0.07779	0.0416	0.06911	0.06293	0.0666	0.06946	0.00698	0.00308	0.00093	0
1568.35	0.0361	0.0698	0.07798	0.04144	0.06887	0.0627	0.06628	0.0693	0.00684	0.003	0.0009	0
1566.92	0.03632	0.0704	0.07926	0.04256	0.06955	0.06336	0.06689	0.06956	0.00715	0.00321	0.00104	1e-05
1565.5	0.0365	0.07086	0.08042	0.04368	0.07015	0.06395	0.06749	0.06975	0.00745	0.00342	0.00118	2e-05
1564.07	0.03644	0.07092	0.08086	0.044	0.07007	0.06388	0.06753	0.06966	0.00743	0.0034	0.00117	2e-05
1562.64	0.03598	0.0704	0.08022	0.04304	0.06898	0.06279	0.06669	0.06914	0.00691	0.00303	0.00095	1e-05
1561.21	0.03472	0.06874	0.07782	0.04008	0.06617	0.05996	0.06434	0.06772	0.00564	0.00218	0.00049	0
1559.79	0.03234	0.06568	0.0735	0.03488	0.06141	0.05519	0.06013	0.06504	0.00384	0.00112	7e-05	7e-05
1558.36	0.03034	0.06344	0.07078	0.0312	0.0582	0.05195	0.05695	0.06276	0.00284	0.00063	0	0.00015
1556.93	0.03084	0.06492	0.07331	0.03304	0.06039	0.05398	0.05837	0.06334	0.00341	0.00094	3e-05	8e-05
1555.51	0.03238	0.06778	0.07731	0.03696	0.06426	0.05769	0.06148	0.06517	0.00467	0.00166	0.00026	1e-05
1554.08	0.0335	0.07002	0.08032	0.04	0.06692	0.06024	0.06372	0.06666	0.00567	0.00228	0.00055	0
1552.65	0.03418	0.07148	0.08237	0.04208	0.06828	0.06159	0.06496	0.0676	0.00622	0.00264	0.00075	0
1551.23	0.0345	0.07224	0.08371	0.04328	0.06882	0.06218	0.0655	0.06809	0.00645	0.00282	0.00084	1e-05
1549.8	0.03458	0.07246	0.08448	0.04384	0.06912	0.06252	0.06574	0.06833	0.00655	0.00291	0.00088	1e-05
1548.37	0.03452	0.07238	0.08474	0.044	0.06934	0.06272	0.06585	0.06842	0.00659	0.00295	0.0009	1e-05
1546.94	0.03418	0.07188	0.0841	0.04328	0.0689	0.06221	0.06537	0.06805	0.00636	0.00279	0.00082	1e-05
1545.52	0.03326	0.07066	0.08214	0.04088	0.06707	0.06037	0.06373	0.0669	0.00562	0.00229	0.00056	0
1544.09	0.03176	0.06858	0.07885	0.03712	0.06393	0.05736	0.06097	0.06515	0.00452	0.00158	0.00024	1e-05
1542.66	0.02996	0.066	0.07488	0.03264	0.06024	0.05393	0.05784	0.06335	0.00342	0.00093	3e-05	6e-05
1541.24	0.02838	0.06372	0.07155	0.02888	0.05724	0.05121	0.05551	0.06214	0.00263	0.00053	0	0.00013
1539.81	0.02816	0.06356	0.07181	0.02888	0.05746	0.05156	0.05605	0.06267	0.00262	0.00054	1e-05	0.00012
1538.38	0.02966	0.06612	0.07638	0.03352	0.06156	0.05546	0.05972	0.06509	0.00361	0.00107	5e-05	3e-05
1536.95	0.03122	0.06874	0.08086	0.03848	0.06565	0.05922	0.06315	0.06733	0.00484	0.00181	0.0003	0
1535.53	0.03184	0.06992	0.08269	0.04056	0.06742	0.06075	0.0646	0.06835	0.00544	0.00218	0.00048	0
1534.1	0.03176	0.07	0.08266	0.04056	0.06751	0.06076	0.06476	0.06859	0.00546	0.00216	0.00048	0
1532.67	0.03176	0.07002	0.08266	0.04064	0.06775	0.06104	0.06517	0.06903	0.00554	0.00217	0.00049	0
1531.25	0.0322	0.0704	0.08365	0.04192	0.06892	0.06228	0.06634	0.06994	0.00597	0.00243	0.00063	1e-05
1529.82	0.03252	0.07046	0.08438	0.04304	0.06975	0.06322	0.06708	0.07052	0.00629	0.00264	0.00074	1e-05
1528.39	0.0322	0.06974	0.08374	0.04272	0.06922	0.06282	0.06649	0.07018	0.00609	0.00253	0.00068	1e-05
1526.97	0.0314	0.06846	0.08202	0.04128	0.06756	0.06126	0.0649	0.06905	0.00549	0.00217	0.0005	0
1525.54	0.03054	0.0671	0.07987	0.0396	0.0656	0.05932	0.06318	0.06768	0.00487	0.00181	0.00033	0
1524.11	0.02974	0.06562	0.07738	0.03776	0.06358	0.05722	0.06158	0.06629	0.00431	0.00149	0.0002	0
1522.68	0.02892	0.06382	0.07443	0.0356	0.06146	0.05491	0.05984	0.06475	0.00377	0.00118	0.0001	2e-05
1521.26	0.02832	0.06228	0.07203	0.034	0.05996	0.05326	0.05845	0.06348	0.00345	0.001	5e-05	3e-05
1519.83	0.02834	0.06172	0.07126	0.034	0.05968	0.05311	0.05813	0.063	0.00351	0.00103	6e-05	3e-05
1518.4	0.02864	0.06172	0.07133	0.03472	0.05984	0.05367	0.05832	0.06289	0.00373	0.00114	9e-05	2e-05
1516.98	0.02898	0.06174	0.07142	0.03528	0.05999	0.05417	0.05845	0.06275	0.00399	0.00128	0.00013	1e-05
1515.55	0.02944	0.062	0.07181	0.03648	0.06059	0.0549	0.05882	0.06287	0.00441	0.00152	0.00022	0
1514.12	0.02994	0.06244	0.07242	0.038	0.06151	0.05575	0.05941	0.06323	0.00492	0.00184	0.00036	0
1512.69	0.03008	0.06244	0.07232	0.03872	0.06165	0.05578	0.05937	0.06312	0.00512	0.00199	0.00043	0
1511.27	0.02954	0.06144	0.07069	0.03736	0.06015	0.05424	0.05796	0.06198	0.00468	0.00174	0.00031	0
1509.84	0.02826	0.05924	0.06726	0.03368	0.05685	0.05102	0.05501	0.0598	0.00364	0.00113	9e-05	2e-05
1508.41	0.02644	0.05616	0.0625	0.02856	0.05239	0.04675	0.05111	0.05707	0.00242	0.00049	0	0.00011
1506.99	0.0252	0.05392	0.05907	0.02512	0.0496	0.04415	0.04882	0.05548	0.00183	0.00024	8e-05	0.00017
1505.56	0.02604	0.05486	0.06077	0.0272	0.0519	0.04641	0.05108	0.05692	0.00251	0.00052	0	8e-05
1504.13	0.0278	0.05742	0.06499	0.03184	0.05636	0.05066	0.05506	0.05948	0.00403	0.00134	0.00017	0
1502.7	0.0289	0.05906	0.06771	0.03472	0.0591	0.05324	0.05739	0.06096	0.00521	0.00207	0.0005	1e-05
1501.28	0.02916	0.0594	0.06829	0.03528	0.05968	0.0538	0.05785	0.06121	0.00556	0.0023	0.00062	1e-05
1499.85	0.02878	0.05872	0.06726	0.03424	0.05873	0.05301	0.05705	0.06062	0.00528	0.00212	0.00052	0
1498.42	0.02812	0.0575	0.06547	0.03256	0.05717	0.05171	0.05578	0.05968	0.00478	0.00181	0.00037	0
1497	0.02764	0.05664	0.06419	0.03168	0.05627	0.05101	0.05512	0.05912	0.00456	0.00168	0.00032	0
1495.57	0.0277	0.0567	0.06429	0.03224	0.05678	0.05151	0.05565	0.05931	0.00483	0.00187	0.00041	0
1494.14	0.02802	0.05712	0.06486	0.03328	0.0577	0.05232	0.05643	0.05967	0.00525	0.00215	0.00055	0
1492.72	0.02796	0.05702	0.06445	0.03304	0.05754	0.05216	0.05614	0.05932	0.00525	0.00215	0.00055	0
1491.29	0.0273	0.05604	0.06243	0.0312	0.05584	0.05065	0.05439	0.05804	0.00465	0.00177	0.00036	0
1489.86	0.02638	0.0547	0.05997	0.0288	0.05357	0.04871	0.05222	0.05651	0.00394	0.00134	0.00017	1e-05
1488.43	0.026	0.05416	0.0591	0.028	0.05274	0.04813	0.05156	0.05609	0.00378	0.00125	0.00014	1e-05
1487.01	0.02648	0.05474	0.06048	0.02944	0.05394	0.04937	0.05289	0.05702	0.00431	0.00158	0.00028	0
1485.58	0.0272	0.05566	0.06243	0.0316	0.05575	0.05111	0.05472	0.05823	0.0051	0.00209	0.00053	0
1484.15	0.02764	0.05622	0.06365	0.03304	0.05693	0.05225	0.05586	0.05892	0.00567	0.00247	0.00074	2e-05
1482.73	0.02768	0.05626	0.06394	0.03344	0.05726	0.05252	0.05614	0.059	0.00587	0.00263	0.00082	2e-05
1481.3	0.02748	0.05598	0.06358	0.03328	0.05706	0.05226	0.0559	0.05876	0.00584	0.00263	0.00081	2e-05
1479.87	0.02724	0.05556	0.06298	0.03296	0.05663	0.0518	0.05544	0.0584	0.00571	0.00256	0.00077	2e-05
1478.44	0.02694	0.05496	0.06208	0.03224	0.05585	0.05101	0.05466	0.05783	0.00543	0.00237	0.00067	1e-05
1477.02	0.02636	0.05398	0.06064	0.0308	0.0544	0.04956	0.05332	0.0568	0.00488	0.002	0.00049	0
1475.59	0.02544	0.0526	0.05853	0.02856	0.05231	0.0474	0.05145	0.05539	0.00411	0.00151	0.00026	0
1474.16	0.02438	0.05106	0.05622	0.02616	0.05017	0.04519	0.04953	0.05406	0.00342	0.0011	0.00011	1e-05
1472.74	0.02374	0.05016	0.05494	0.02512	0.04921	0.04425	0.0486	0.05354	0.00318	0.00097	7e-05	2e-05
1471.31	0.02412	0.05052	0.05578	0.02648	0.05026	0.04544	0.0495	0.0542	0.00364	0.00123	0.00016	0
1469.88	0.02506	0.0516	0.05776	0.02904	0.05225	0.04759	0.05138	0.05532	0.00449	0.00176	0.00038	0
1468.46	0.0257	0.05228	0.0591	0.0308	0.0535	0.04891	0.0527	0.05593	0.00512	0.00215	0.00059	1e-05
1467.03	0.02574	0.05214	0.05901	0.03104	0.0534	0.04886	0.05284	0.05579	0.00518	0.00219	0.00061	2e-05
1465.6	0.02534	0.05162	0.05805	0.0304	0.05252	0.04802	0.05219	0.05529	0.00491	0.00201	0.00051	1e-05
1464.17	0.02504	0.05142	0.0575	0.03016	0.05199	0.04751	0.05175	0.05507	0.00478	0.00193	0.00047	1e-05
1462.75	0.02496	0.05158	0.05773	0.0304	0.05205	0.04753	0.05177	0.05517	0.00486	0.002	0.0005	1e-05
1461.32	0.02468	0.05134	0.05754	0.02992	0.05167	0.04706	0.05135	0.05491	0.00474	0.00195	0.00047	1e-05
1459.89	0.02378	0.0501	0.05578	0.02768	0.04992	0.04525	0.04965	0.05373	0.00406	0.00154	0.00027	0
1458.47	0.02236	0.04798	0.05254	0.02416	0.04692	0.04229	0.0468	0.05172	0.00303	0.00094	5e-05	1e-05
1457.04	0.02134	0.04642	0.05018	0.02208	0.04472	0.04028	0.04477	0.05023	0.00241	0.0006	0	4e-05
1455.61	0.02176	0.04712	0.05133	0.02368	0.04562	0.04134	0.04571	0.05082	0.00273	0.00078	2e-05	2e-05
1454.18	0.0229	0.049	0.05427	0.02712	0.04819	0.04388	0.04817	0.05252	0.00363	0.00129	0.00017	0
1452.76	0.02378	0.05046	0.05658	0.02976	0.05023	0.04578	0.05	0.05383	0.00443	0.00179	0.00038	1e-05
1451.33	0.02412	0.05112	0.05766	0.03112	0.0512	0.0466	0.05075	0.05439	0.00485	0.00204	0.00052	2e-05
1449.9	0.02404	0.05112	0.05789	0.03136	0.05127	0.04656	0.05066	0.0543	0.00493	0.00206	0.00053	3e-05
1448.48	0.02376	0.05084	0.05773	0.0312	0.05093	0.04613	0.05029	0.05395	0.00485	0.002	0.0005	3e-05
1447.05	0.02362	0.05082	0.05786	0.03144	0.05087	0.04604	0.05027	0.05382	0.00486	0.00202	0.00051	3e-05
1445.62	0.02376	0.05118	0.0585	0.0324	0.05132	0.04657	0.05078	0.05407	0.00507	0.00219	0.0006	5e-05
1444.2	0.024	0.05154	0.05926	0.03344	0.05185	0.04724	0.05139	0.0544	0.00534	0.0024	0.00072	7e-05
1442.77	0.02416	0.05166	0.05968	0.03392	0.05203	0.04752	0.05171	0.05449	0.00548	0.00251	0.00079	8e-05
1441.34	0.02408	0.05152	0.05962	0.03392	0.05172	0.04723	0.0516	0.05422	0.00543	0.00248	0.00077	9e-05
1439.91	0.02372	0.05114	0.05888	0.03328	0.05085	0.04639	0.05092	0.05356	0.00513	0.00228	0.00066	7e-05
1438.49	0.02308	0.05044	0.0575	0.03192	0.04936	0.04503	0.04956	0.0525	0.00456	0.0019	0.00046	4e-05
1437.06	0.02238	0.04958	0.05603	0.03024	0.04774	0.04356	0.04791	0.05135	0.00397	0.00153	0.00028	2e-05
1435.63	0.022	0.04916	0.05552	0.02944	0.04704	0.0429	0.04704	0.0508	0.00377	0.00141	0.00024	1e-05
1434.21	0.02202	0.04936	0.05606	0.02992	0.04741	0.04317	0.04723	0.05096	0.004	0.00157	0.00032	3e-05
1432.78	0.02206	0.04964	0.05651	0.03048	0.0478	0.04348	0.04753	0.05117	0.00426	0.00174	0.00041	4e-05
1431.35	0.02196	0.04958	0.05626	0.03056	0.04767	0.04331	0.04739	0.05104	0.00429	0.00177	0.00043	5e-05
1429.92	0.0219	0.04926	0.05571	0.03032	0.04741	0.04293	0.04705	0.05074	0.00423	0.00176	0.00042	5e-05
1428.5	0.02202	0.04902	0.05549	0.03048	0.04747	0.04276	0.04691	0.05049	0.00427	0.00181	0.00044	6e-05
1427.07	0.02214	0.04878	0.05542	0.03048	0.04751	0.04267	0.04679	0.05018	0.00433	0.00186	0.00047	7e-05
1425.64	0.02206	0.0483	0.05504	0.03008	0.04701	0.04226	0.04634	0.04965	0.00423	0.0018	0.00044	7e-05
1424.22	0.02176	0.04756	0.05421	0.02928	0.0461	0.04155	0.04563	0.04898	0.00398	0.00165	0.00037	6e-05
1422.79	0.02132	0.04678	0.05331	0.02848	0.04521	0.04076	0.04492	0.0484	0.0037	0.0015	0.0003	5e-05
1421.36	0.0208	0.0459	0.05219	0.02736	0.0442	0.03974	0.04404	0.04775	0.00337	0.0013	0.00021	3e-05
1419.93	0.02012	0.04478	0.05066	0.02576	0.04272	0.03831	0.04274	0.04684	0.00296	0.00103	0.00011	1e-05
1418.51	0.01964	0.04384	0.04944	0.0244	0.04143	0.03721	0.04166	0.04605	0.00269	0.00086	6e-05	1e-05
1417.08	0.01972	0.04384	0.04944	0.02472	0.04152	0.03749	0.04181	0.04608	0.00287	0.00097	9e-05	1e-05
1415.65	0.02012	0.04454	0.05027	0.02616	0.04261	0.03866	0.04281	0.04667	0.00338	0.00128	0.00021	4e-05
1414.23	0.02038	0.04512	0.05078	0.0272	0.04345	0.03952	0.04358	0.04708	0.00381	0.00158	0.00035	7e-05
1412.8	0.02042	0.04526	0.05075	0.02736	0.04361	0.03966	0.04374	0.04706	0.00399	0.00171	0.00042	9e-05
1411.37	0.02036	0.0451	0.0505	0.0272	0.0434	0.03941	0.04353	0.04677	0.00401	0.00173	0.00044	0.0001
1409.95	0.0203	0.0448	0.05024	0.02704	0.04315	0.03916	0.04329	0.04647	0.00401	0.00172	0.00044	0.00011
1408.52	0.02018	0.04438	0.04979	0.02688	0.04285	0.03894	0.04305	0.04618	0.00398	0.0017	0.00044	0.00011
1407.09	0.01988	0.04376	0.04893	0.02632	0.04224	0.03847	0.0426	0.04575	0.00386	0.00164	0.0004	0.00011
1405.66	0.0195	0.04308	0.04781	0.02544	0.04141	0.03773	0.04198	0.04523	0.00368	0.00153	0.00034	0.00011
1404.24	0.01922	0.04258	0.04701	0.02496	0.04084	0.03716	0.04158	0.0449	0.00359	0.00147	0.00032	0.00012
1402.81	0.01906	0.04228	0.04669	0.02512	0.04062	0.03697	0.04149	0.04478	0.0036	0.00147	0.00034	0.00014
1401.38	0.01884	0.04188	0.0463	0.0252	0.04025	0.03666	0.0412	0.04451	0.0035	0.0014	0.00031	0.00015
1399.96	0.01842	0.04118	0.04544	0.02456	0.03939	0.0358	0.04036	0.04385	0.0032	0.00119	0.00022	0.00012
1398.53	0.01794	0.0404	0.04429	0.02344	0.03828	0.03458	0.03918	0.043	0.00284	0.00095	0.00012	7e-05
1397.1	0.01754	0.03984	0.04336	0.02232	0.03738	0.0335	0.03814	0.04224	0.00257	0.00079	7e-05	4e-05
1395.67	0.01736	0.03958	0.04288	0.02168	0.03697	0.03292	0.03759	0.04177	0.00247	0.00076	6e-05	3e-05
1394.25	0.01744	0.03972	0.04304	0.02192	0.03725	0.0331	0.03774	0.04173	0.00259	0.00087	9e-05	4e-05
1392.82	0.01774	0.04012	0.04371	0.02288	0.03805	0.03388	0.03844	0.04207	0.00287	0.00107	0.00016	6e-05
1391.39	0.01796	0.04038	0.04432	0.02368	0.03869	0.03455	0.03897	0.04233	0.00311	0.00125	0.00022	8e-05
1389.97	0.01784	0.0402	0.04432	0.02368	0.03859	0.0345	0.03882	0.04213	0.00311	0.00126	0.00022	8e-05
1388.54	0.01742	0.03968	0.04374	0.02304	0.03784	0.03381	0.03813	0.04155	0.00291	0.00113	0.00016	6e-05
1387.11	0.017	0.0393	0.04336	0.02264	0.0372	0.03321	0.0376	0.04115	0.00277	0.00103	0.00012	5e-05
1385.69	0.01692	0.03948	0.04365	0.02304	0.03729	0.03327	0.03769	0.04133	0.00284	0.00108	0.00015	5e-05
1384.26	0.01708	0.03998	0.04435	0.02368	0.03777	0.03376	0.03808	0.04177	0.00303	0.00122	0.00022	7e-05
1382.83	0.01718	0.04038	0.0448	0.02392	0.03799	0.03407	0.0382	0.04201	0.00316	0.00132	0.00027	8e-05
1381.4	0.01704	0.04046	0.0448	0.0236	0.03779	0.03402	0.03793	0.04191	0.00313	0.00131	0.00027	8e-05
1379.98	0.01676	0.04022	0.04451	0.0232	0.03737	0.03374	0.03747	0.04155	0.00301	0.00123	0.00024	7e-05
1378.55	0.01644	0.0397	0.04413	0.02272	0.03685	0.0333	0.03693	0.04101	0.00286	0.00111	0.0002	6e-05
1377.12	0.0161	0.03898	0.04355	0.02208	0.03612	0.0326	0.03626	0.04031	0.00266	0.00095	0.00014	4e-05
1375.7	0.01572	0.03822	0.04272	0.02112	0.0352	0.03172	0.03549	0.0396	0.00241	0.00079	9e-05	3e-05
1374.27	0.01544	0.03774	0.04211	0.02048	0.0345	0.0311	0.03497	0.03917	0.00225	0.0007	6e-05	2e-05
1372.84	0.0154	0.03778	0.04214	0.02064	0.03442	0.03112	0.03508	0.03921	0.0023	0.00074	7e-05	3e-05
1371.41	0.0155	0.03808	0.04266	0.02144	0.03479	0.03152	0.03557	0.03954	0.00246	0.00086	0.00011	4e-05
1369.99	0.0155	0.03824	0.04288	0.02176	0.03509	0.03178	0.03594	0.0398	0.00259	0.00096	0.00014	5e-05
1368.56	0.01538	0.03818	0.04269	0.02168	0.03517	0.0318	0.03605	0.03986	0.00264	0.00099	0.00016	6e-05
1367.13	0.0152	0.03806	0.04221	0.02136	0.03513	0.03174	0.03602	0.03981	0.00264	0.00099	0.00016	6e-05
1365.71	0.01502	0.03786	0.0417	0.02096	0.03488	0.03151	0.03585	0.03968	0.00256	0.00092	0.00013	6e-05
1364.28	0.01474	0.0375	0.04115	0.0204	0.03437	0.03106	0.03552	0.03957	0.00236	0.00078	9e-05	5e-05
1362.85	0.01446	0.0373	0.04112	0.02008	0.03406	0.03082	0.0354	0.03977	0.00217	0.00067	5e-05	3e-05
1361.43	0.01438	0.03758	0.04202	0.02064	0.03451	0.03135	0.036	0.04055	0.00221	0.00069	6e-05	4e-05
1360	0.01448	0.03814	0.04342	0.02192	0.03552	0.03245	0.03706	0.04161	0.00244	0.00085	0.00011	6e-05
1358.57	0.01464	0.03838	0.04422	0.02304	0.03627	0.03336	0.03783	0.04236	0.00268	0.00102	0.00017	9e-05
1357.14	0.01466	0.03814	0.044	0.02344	0.03638	0.03363	0.03796	0.04253	0.00279	0.0011	0.00021	0.0001
1355.72	0.01458	0.03766	0.0432	0.02336	0.03613	0.03343	0.03772	0.04231	0.00279	0.00111	0.00021	0.00011
1354.29	0.01442	0.03728	0.04253	0.02336	0.036	0.03321	0.03759	0.0421	0.00279	0.00112	0.00022	0.00012
1352.86	0.01432	0.03722	0.04246	0.02368	0.03619	0.03333	0.03783	0.04216	0.00283	0.00116	0.00024	0.00013
1351.44	0.01426	0.03748	0.04285	0.02424	0.03652	0.03374	0.03834	0.04252	0.00286	0.00121	0.00026	0.00014
1350.01	0.01426	0.0379	0.04333	0.02472	0.03684	0.03422	0.0389	0.04308	0.00287	0.00122	0.00027	0.00015
1348.58	0.01422	0.03824	0.04368	0.02488	0.03711	0.03459	0.03936	0.04371	0.00286	0.00122	0.00027	0.00015
1347.15	0.01412	0.03834	0.04378	0.02472	0.03728	0.03476	0.03965	0.04422	0.00285	0.00121	0.00026	0.00014
1345.73	0.01396	0.03808	0.04352	0.02424	0.03724	0.03467	0.03971	0.04442	0.00283	0.00119	0.00025	0.00014
1344.3	0.01372	0.03742	0.04285	0.02336	0.03683	0.0342	0.03941	0.04421	0.00274	0.00112	0.00023	0.00013
1342.87	0.01342	0.0364	0.04157	0.02216	0.03588	0.03317	0.03858	0.04348	0.0025	0.00097	0.00017	0.00011
1341.45	0.01302	0.03512	0.03965	0.02056	0.03434	0.03154	0.03708	0.04211	0.00214	0.00076	9e-05	7e-05
1340.02	0.01258	0.03386	0.03754	0.01888	0.03257	0.02976	0.03521	0.04033	0.00181	0.00058	3e-05	4e-05
1338.59	0.01226	0.03292	0.03581	0.01768	0.03126	0.02854	0.03371	0.0388	0.00168	0.00051	2e-05	3e-05
1337.16	0.0122	0.03232	0.03462	0.01736	0.03068	0.0281	0.03295	0.03789	0.00177	0.00057	3e-05	5e-05
1335.74	0.01228	0.03178	0.03366	0.0172	0.03047	0.02797	0.03261	0.03737	0.00197	0.00069	7e-05	7e-05
1334.31	0.01232	0.0311	0.03267	0.01688	0.03018	0.02771	0.03223	0.03686	0.0021	0.0008	0.00011	0.0001
1332.88	0.01226	0.03026	0.03152	0.01608	0.02965	0.02722	0.0316	0.03623	0.00215	0.00084	0.00013	0.00011
1331.46	0.01216	0.0294	0.03037	0.01528	0.02892	0.02657	0.03079	0.03545	0.00213	0.00084	0.00013	0.00012
1330.03	0.01202	0.02864	0.02928	0.01448	0.02809	0.02586	0.02994	0.03458	0.0021	0.00082	0.00012	0.00013
1328.6	0.01188	0.02798	0.02826	0.01376	0.02731	0.02515	0.02919	0.03372	0.00206	0.00079	0.00012	0.00013
1327.18	0.01174	0.02736	0.0272	0.0132	0.02661	0.02445	0.02852	0.03292	0.00201	0.00077	0.00012	0.00013
1325.75	0.0116	0.02672	0.02624	0.01264	0.02597	0.02375	0.02791	0.03217	0.00195	0.00074	0.00011	0.00013
1324.32	0.01142	0.02602	0.02538	0.01224	0.02532	0.02308	0.02731	0.03149	0.00186	0.00072	0.0001	0.00013
1322.89	0.0112	0.0253	0.02454	0.01184	0.02463	0.02241	0.02667	0.03086	0.00176	0.00068	8e-05	0.00013
1321.47	0.0109	0.02458	0.02362	0.01136	0.02388	0.02172	0.02591	0.03023	0.00164	0.00062	6e-05	0.00012
1320.04	0.0106	0.02388	0.02262	0.01064	0.02312	0.02098	0.02508	0.02957	0.00152	0.00055	4e-05	0.00011
1318.61	0.01036	0.0233	0.0217	0.01	0.02247	0.02034	0.02436	0.02899	0.00144	0.0005	2e-05	0.0001
1317.19	0.0102	0.02284	0.02096	0.00952	0.022	0.0199	0.02389	0.02856	0.00142	0.00048	2e-05	0.00011
1315.76	0.01004	0.02248	0.02035	0.0092	0.02162	0.01962	0.02363	0.0282	0.00141	0.00049	2e-05	0.00012
1314.33	0.00986	0.02208	0.01984	0.00904	0.02125	0.01939	0.02343	0.02784	0.00141	0.00049	2e-05	0.00013
1312.9	0.00968	0.0217	0.01942	0.00896	0.02092	0.01918	0.02326	0.0275	0.0014	0.0005	3e-05	0.00014
1311.48	0.00956	0.02138	0.01901	0.00888	0.02067	0.01896	0.02311	0.02722	0.00143	0.00051	4e-05	0.00015
1310.05	0.00948	0.02108	0.01859	0.0088	0.02046	0.01869	0.02294	0.02705	0.00148	0.00053	5e-05	0.00015
1308.62	0.0094	0.0208	0.01811	0.00856	0.02026	0.01846	0.0228	0.02712	0.00151	0.00053	5e-05	0.00016
1307.2	0.0093	0.0205	0.0177	0.00832	0.0201	0.01836	0.02279	0.02752	0.00151	0.00054	5e-05	0.00015
1305.77	0.00916	0.02016	0.01728	0.00808	0.01993	0.01832	0.02287	0.02798	0.00149	0.00054	5e-05	0.00016
1304.34	0.00902	0.01982	0.0169	0.00784	0.01967	0.01814	0.02278	0.02802	0.00146	0.00054	5e-05	0.00016
1302.92	0.00888	0.01944	0.01651	0.0076	0.01933	0.01776	0.02241	0.02744	0.00143	0.00053	5e-05	0.00017
1301.49	0.00882	0.01904	0.01616	0.00744	0.01899	0.01734	0.0219	0.02652	0.00142	0.00051	5e-05	0.00018
1300.06	0.00878	0.01866	0.0159	0.00736	0.01867	0.01703	0.02145	0.02567	0.0014	0.0005	4e-05	0.00018
1298.63	0.00872	0.01836	0.01568	0.00728	0.01834	0.01681	0.02107	0.02507	0.00138	0.00049	4e-05	0.00019
1297.21	0.0086	0.01814	0.01539	0.0072	0.01797	0.01655	0.02073	0.02468	0.00134	0.00048	3e-05	0.00019
1295.78	0.0084	0.0179	0.01504	0.00704	0.01759	0.01621	0.02041	0.0244	0.0013	0.00046	3e-05	0.0002
1294.35	0.00816	0.01762	0.01466	0.0068	0.01722	0.01587	0.0201	0.02412	0.00127	0.00044	3e-05	0.0002
1292.93	0.00794	0.01736	0.0143	0.00648	0.01688	0.01557	0.01976	0.02381	0.00123	0.00042	3e-05	0.00019
1291.5	0.00776	0.01718	0.01398	0.00624	0.01657	0.01528	0.01939	0.02353	0.00119	0.00041	2e-05	0.00018
1290.07	0.00766	0.01704	0.0137	0.006	0.01627	0.01496	0.019	0.0233	0.00114	0.00039	2e-05	0.00018
1288.64	0.0076	0.01688	0.01338	0.00592	0.01598	0.01465	0.01864	0.0231	0.0011	0.00037	2e-05	0.00018
1287.22	0.00752	0.01662	0.01306	0.00576	0.01573	0.01438	0.01836	0.02287	0.00108	0.00036	2e-05	0.00019
1285.79	0.00742	0.01632	0.0128	0.00576	0.01553	0.01417	0.0182	0.02266	0.00108	0.00036	2e-05	0.0002
1284.36	0.0073	0.01598	0.01261	0.00568	0.01534	0.01399	0.0181	0.02248	0.00108	0.00037	2e-05	0.00021
1282.94	0.0072	0.01566	0.01238	0.00568	0.01514	0.01381	0.018	0.02227	0.00107	0.00038	2e-05	0.00021
1281.51	0.0071	0.01538	0.01213	0.0056	0.01492	0.01361	0.01781	0.02196	0.00105	0.00038	2e-05	0.00021
1280.08	0.00698	0.01512	0.01181	0.00536	0.01467	0.0134	0.01752	0.0216	0.00103	0.00038	2e-05	0.0002
1278.65	0.00686	0.0149	0.01149	0.00512	0.01438	0.01319	0.01717	0.02129	0.00102	0.00038	2e-05	0.0002
1277.23	0.00672	0.01472	0.0112	0.00496	0.01408	0.01298	0.01684	0.02105	0.00101	0.00037	1e-05	0.00021
1275.8	0.00658	0.01452	0.01098	0.00496	0.0138	0.01276	0.01656	0.02083	0.00099	0.00035	1e-05	0.00022
1274.37	0.00642	0.0143	0.01075	0.00488	0.01355	0.01249	0.01627	0.02055	0.00096	0.00033	1e-05	0.00023
1272.95	0.00624	0.014	0.0105	0.00472	0.01329	0.01219	0.01594	0.02026	0.00092	0.00031	1e-05	0.00023
1271.52	0.00614	0.01366	0.01021	0.00456	0.01303	0.01191	0.01559	0.02	0.00088	0.00029	0	0.00022
1270.09	0.00608	0.01336	0.00995	0.0044	0.0128	0.01166	0.0153	0.01974	0.00085	0.00027	0	0.00022
1268.67	0.00602	0.01316	0.0097	0.00432	0.01259	0.01147	0.01509	0.01946	0.00083	0.00026	0	0.00023
1267.24	0.0059	0.01308	0.00944	0.00432	0.01236	0.0113	0.01492	0.01917	0.00083	0.00026	0	0.00024
1265.81	0.00576	0.013	0.00912	0.00424	0.01212	0.0111	0.01476	0.01893	0.00083	0.00026	0	0.00024
1264.38	0.00562	0.01282	0.00886	0.00408	0.01188	0.01086	0.01462	0.01871	0.00084	0.00026	0	0.00024
1262.96	0.00548	0.01252	0.00867	0.00392	0.01161	0.01061	0.01444	0.01848	0.00083	0.00025	0	0.00024
1261.53	0.00534	0.01222	0.00845	0.00384	0.01131	0.01037	0.01417	0.01823	0.0008	0.00023	0	0.00024
1260.1	0.0052	0.01198	0.00822	0.00368	0.01097	0.01015	0.01383	0.01799	0.00077	0.00022	0	0.00023
1258.68	0.0051	0.01184	0.008	0.0036	0.01066	0.00994	0.01352	0.01777	0.00075	0.00021	0	0.00024
1257.25	0.005	0.01164	0.00784	0.00352	0.01039	0.00974	0.01329	0.01755	0.00074	0.00022	0	0.00024
1255.82	0.00486	0.01138	0.00765	0.00336	0.01014	0.00952	0.01312	0.01729	0.00072	0.00022	0	0.00026
1254.39	0.00474	0.01108	0.00746	0.00328	0.00992	0.0093	0.01295	0.01698	0.00069	0.00021	0	0.00026
1252.97	0.00464	0.01084	0.0072	0.0032	0.00977	0.00907	0.01276	0.01666	0.00066	0.0002	0	0.00027
1251.54	0.00458	0.01072	0.00698	0.00312	0.00967	0.00885	0.01253	0.01636	0.00063	0.00019	0	0.00027
1250.11	0.00454	0.0106	0.00682	0.00312	0.00955	0.00864	0.01226	0.01611	0.00061	0.00019	0	0.00028
1248.69	0.00444	0.01046	0.00662	0.00312	0.00936	0.00844	0.012	0.01589	0.00059	0.00018	0	0.00028
1247.26	0.00428	0.01028	0.0064	0.00312	0.0091	0.00824	0.01176	0.0157	0.00056	0.00016	1e-05	0.00028
1245.83	0.00414	0.01006	0.00618	0.00296	0.00882	0.00801	0.01153	0.0155	0.00053	0.00014	1e-05	0.00027
1244.41	0.00402	0.00978	0.00598	0.0028	0.00855	0.00777	0.0113	0.01527	0.00049	0.00013	0	0.00027
1242.98	0.00398	0.00946	0.00586	0.00272	0.00827	0.00754	0.01107	0.01505	0.00046	0.00012	0	0.00027
1241.55	0.00398	0.0092	0.00579	0.00264	0.008	0.00732	0.01085	0.01487	0.00044	0.00012	0	0.00028
1240.12	0.00396	0.00898	0.00566	0.00272	0.00774	0.00707	0.01065	0.01472	0.00041	0.00011	1e-05	0.00028
1238.7	0.00388	0.00886	0.00544	0.00264	0.00751	0.0068	0.01043	0.01453	0.00039	0.0001	1e-05	0.00028
1237.27	0.00378	0.00872	0.00515	0.00248	0.00727	0.00657	0.01018	0.01428	0.00037	9e-05	2e-05	0.00027
1235.84	0.00364	0.00852	0.0048	0.00224	0.007	0.00642	0.00993	0.01395	0.00036	8e-05	2e-05	0.00028
1234.42	0.00348	0.00824	0.00451	0.002	0.00673	0.00631	0.0097	0.0136	0.00036	8e-05	2e-05	0.00031
1232.99	0.00334	0.00794	0.00429	0.00184	0.0065	0.00619	0.00953	0.01328	0.00036	7e-05	3e-05	0.00034
1231.56	0.00322	0.00772	0.0041	0.00176	0.00632	0.00605	0.00938	0.01301	0.00036	7e-05	3e-05	0.00037
1230.13	0.00308	0.00758	0.00387	0.00168	0.00616	0.00585	0.00917	0.01277	0.00035	6e-05	3e-05	0.00038
1228.71	0.00298	0.00742	0.00371	0.00152	0.00599	0.00561	0.00887	0.01254	0.00033	5e-05	3e-05	0.0004
1227.28	0.0029	0.00724	0.00358	0.00144	0.00581	0.00534	0.00854	0.01235	0.00029	4e-05	4e-05	0.00043
1225.85	0.00286	0.00704	0.00342	0.00136	0.00562	0.0051	0.00826	0.0122	0.00025	4e-05	5e-05	0.00047
1224.43	0.00282	0.0069	0.0033	0.0012	0.00543	0.00491	0.00806	0.01207	0.00022	4e-05	6e-05	0.00051
1223	0.00278	0.00686	0.0032	0.0012	0.00527	0.00477	0.00795	0.01195	0.00019	4e-05	6e-05	0.00054
1221.57	0.00274	0.00688	0.0032	0.0012	0.00516	0.00469	0.0079	0.01184	0.00018	5e-05	6e-05	0.00054
1220.15	0.00272	0.00686	0.0032	0.0012	0.00508	0.00465	0.00786	0.01175	0.00017	5e-05	5e-05	0.00053
1218.72	0.0027	0.00674	0.00326	0.0012	0.00497	0.00462	0.00779	0.01164	0.00017	6e-05	5e-05	0.0005
1217.29	0.00264	0.00658	0.00326	0.00128	0.00481	0.00457	0.00769	0.01149	0.00017	5e-05	4e-05	0.00047
1215.86	0.00256	0.0065	0.00323	0.00128	0.00465	0.00448	0.0076	0.01133	0.00018	5e-05	4e-05	0.00044
1214.44	0.0025	0.0065	0.00317	0.00136	0.00453	0.00437	0.00756	0.01121	0.0002	5e-05	4e-05	0.00041
1213.01	0.0025	0.00654	0.00314	0.00136	0.00446	0.00425	0.00753	0.01115	0.00021	6e-05	4e-05	0.00038
1211.58	0.00252	0.00652	0.00307	0.00136	0.00443	0.00413	0.00746	0.01111	0.00022	5e-05	4e-05	0.00033
1210.16	0.0025	0.00644	0.00298	0.00128	0.00437	0.00402	0.0073	0.01103	0.00022	4e-05	4e-05	0.0003
1208.73	0.00242	0.0063	0.00285	0.0012	0.00426	0.00392	0.00705	0.01087	0.00022	3e-05	5e-05	0.00028
1207.3	0.0023	0.00618	0.00269	0.00104	0.00407	0.00381	0.0068	0.01063	0.00023	3e-05	5e-05	0.00028
1205.87	0.00216	0.00606	0.00243	0.00088	0.00387	0.00368	0.00662	0.01037	0.00023	3e-05	7e-05	0.00028
1204.45	0.00202	0.00594	0.00214	0.0008	0.0037	0.00353	0.0065	0.01016	0.00024	4e-05	9e-05	0.00028
1203.02	0.00194	0.00576	0.00192	0.00072	0.00356	0.00336	0.00636	0.01007	0.00024	3e-05	0.00011	0.00029
1201.59	0.0019	0.00558	0.00182	0.00064	0.00345	0.0032	0.00617	0.01003	0.00021	2e-05	0.00013	0.00031
1200.17	0.00192	0.00544	0.00189	0.00056	0.00336	0.00308	0.00596	0.00997	0.00017	1e-05	0.00015	0.00032

## Sheet: 3f
Tempareture	0.5wt%Re1/TiO2			Tempareture	12.0wt%Re1/TiO2
50.0943	1.86479e-05			50.018	1.59358e-05
50.2135	1.83405e-05			50.137	1.5731e-05
50.3325	1.85597e-05			50.2447	1.56995e-05
50.4402	1.84102e-05			50.3635	1.57699e-05
50.5477	1.85799e-05			50.4712	1.58664e-05
50.6667	1.86882e-05			50.5787	1.56377e-05
50.7743	1.84799e-05			50.6977	1.5771e-05
50.8818	1.86e-05			50.8168	1.56649e-05
51.0008	1.84799e-05			50.9243	1.58234e-05
51.12	1.84766e-05			51.0435	1.59789e-05
51.239	1.85454e-05			51.151	1.59882e-05
51.358	1.83951e-05			51.2702	1.57929e-05
51.4772	1.85018e-05			51.3892	1.5813e-05
51.5962	1.85253e-05			51.5082	1.58161e-05
51.7152	1.84472e-05			51.6273	1.5729e-05
51.8343	1.85286e-05			51.7463	1.59389e-05
51.9418	1.85782e-05			51.8655	1.59095e-05
52.061	1.8542e-05			51.9845	1.57499e-05
52.157	1.84959e-05			52.0922	1.56838e-05
52.276	1.85488e-05			52.1997	1.57741e-05
52.395	1.84993e-05			52.3072	1.56355e-05
52.5027	1.84556e-05			52.4263	1.58707e-05
52.6217	1.85505e-05			52.5452	1.59547e-05
52.7408	1.86353e-05			52.6413	1.5687e-05
52.8598	1.86269e-05			52.7603	1.58549e-05
52.9788	1.85547e-05			52.868	1.59085e-05
53.098	1.84279e-05			52.987	1.57741e-05
53.217	1.83724e-05			53.0947	1.57762e-05
53.336	1.83464e-05			53.2137	1.5835e-05
53.4552	1.83044e-05			53.3097	1.56586e-05
53.5627	1.84329e-05			53.4057	1.5835e-05
53.6818	1.85925e-05			53.5133	1.57814e-05
53.8008	1.84128e-05			53.6323	1.58927e-05
53.92	1.85773e-05			53.7515	1.58612e-05
54.039	1.84497e-05			53.8705	1.56744e-05
54.158	1.85329e-05			53.978	1.58392e-05
54.2655	1.87369e-05			54.0972	1.59232e-05
54.3847	1.84682e-05			54.2163	1.58224e-05
54.5037	1.83388e-05			54.3353	1.57594e-05
54.5997	1.84841e-05			54.4543	1.58906e-05
54.7188	1.85572e-05			54.5505	1.59347e-05
54.838	1.85118e-05			54.6695	1.58014e-05
54.957	1.84505e-05			54.7885	1.58739e-05
55.076	1.85387e-05			54.8962	1.58896e-05
55.195	1.85387e-05			55.0037	1.57794e-05
55.3142	1.83195e-05			55.0997	1.59872e-05
55.4333	1.84782e-05			55.2188	1.58717e-05
55.5523	1.84665e-05			55.338	1.57405e-05
55.6713	1.85462e-05			55.4455	1.573e-05
55.7675	1.8469e-05			55.5645	1.58686e-05
55.8865	1.84388e-05			55.6835	1.5877e-05
56.0055	1.84312e-05			55.8027	1.59862e-05
56.1247	1.84766e-05			55.9217	1.57657e-05
56.2437	1.8422e-05			56.0293	1.58832e-05
56.3627	1.84573e-05			56.1368	1.5731e-05
56.4703	1.84446e-05			56.2443	1.57468e-05
56.5893	1.84371e-05			56.3635	1.57825e-05
56.7085	1.84867e-05			56.4825	1.59369e-05
56.8275	1.84766e-05			56.6015	1.57174e-05
56.9235	1.85916e-05			56.7207	1.57804e-05
57.0425	1.85034e-05			56.8398	1.59274e-05
57.1385	1.85068e-05			56.9588	1.5625e-05
57.2462	1.82843e-05			57.078	1.58171e-05
57.3537	1.84279e-05			57.197	1.57889e-05
57.4613	1.83203e-05			57.316	1.57531e-05
57.5803	1.85135e-05			57.4352	1.5835e-05
57.6993	1.83968e-05			57.5542	1.57352e-05
57.8185	1.827e-05			57.6617	1.57814e-05
57.926	1.85664e-05			57.7807	1.5814e-05
58.0222	1.83767e-05			57.8883	1.56429e-05
58.1412	1.84236e-05			57.9958	1.59694e-05
58.2602	1.8448e-05			58.1035	1.57342e-05
58.3793	1.84446e-05			58.2225	1.5814e-05
58.4868	1.85631e-05			58.3415	1.58287e-05
58.606	1.84681e-05			58.4607	1.59274e-05
58.725	1.84161e-05			58.5797	1.58444e-05
58.8442	1.84489e-05			58.6988	1.57909e-05
58.9632	1.82649e-05			58.8063	1.59683e-05
59.0822	1.84606e-05			58.9255	1.58193e-05
59.2013	1.85035e-05			59.0443	1.5752e-05
59.3203	1.84665e-05			59.1635	1.59095e-05
59.4393	1.85446e-05			59.2825	1.56775e-05
59.5585	1.85076e-05			59.3902	1.57572e-05
59.6775	1.86487e-05			59.5092	1.57185e-05
59.7967	1.84161e-05			59.6168	1.58266e-05
59.9042	1.85035e-05			59.7358	1.5814e-05
60.0232	1.85673e-05			59.8433	1.56712e-05
60.1422	1.8359e-05			59.9623	1.56513e-05
60.2613	1.85085e-05			60.07	1.58014e-05
60.3803	1.85563e-05			60.166	1.57384e-05
60.4763	1.8474e-05			60.2735	1.57899e-05
60.5838	1.84681e-05			60.381	1.58801e-05
60.703	1.84665e-05			60.5002	1.56786e-05
60.822	1.84262e-05			60.6077	1.58949e-05
60.941	1.84506e-05			60.7268	1.57227e-05
61.0602	1.83539e-05			60.8458	1.58224e-05
61.1793	1.84295e-05			60.9648	1.57972e-05
61.2983	1.8443e-05			61.084	1.58518e-05
61.4175	1.8537e-05			61.1915	1.5773e-05
61.5365	1.84237e-05			61.3105	1.57227e-05
61.6555	1.84354e-05			61.4297	1.59567e-05
61.7747	1.84178e-05			61.5488	1.57678e-05
61.8822	1.83808e-05			61.6678	1.58497e-05
62.0013	1.82313e-05			61.7868	1.57657e-05
62.1088	1.84841e-05			61.906	1.57079e-05
62.228	1.83598e-05			62.025	1.58812e-05
62.347	1.84455e-05			62.144	1.59337e-05
62.4545	1.84413e-05			62.2402	1.57416e-05
62.5735	1.84615e-05			62.3362	1.57741e-05
62.6927	1.84312e-05			62.4552	1.58906e-05
62.8117	1.84732e-05			62.5628	1.60702e-05
62.9308	1.84018e-05			62.6588	1.57574e-05
63.0383	1.85278e-05			62.778	1.5834e-05
63.1575	1.8427e-05			62.897	1.57489e-05
63.2535	1.82414e-05			63.016	1.57574e-05
63.3725	1.84631e-05			63.1235	1.57458e-05
63.4685	1.84623e-05			63.2427	1.58371e-05
63.5762	1.84774e-05			63.3617	1.57447e-05
63.6837	1.85269e-05			63.4577	1.57992e-05
63.7913	1.83321e-05			63.5653	1.58654e-05
63.9103	1.85017e-05			63.6843	1.58392e-05
64.0293	1.84413e-05			63.8035	1.60375e-05
64.1368	1.84539e-05			63.911	1.58412e-05
64.2445	1.8511e-05			64.0302	1.5793e-05
64.3635	1.84161e-05			64.1377	1.58518e-05
64.471	1.84799e-05			64.2452	1.57531e-05
64.5902	1.85379e-05			64.3642	1.58665e-05
64.7092	1.84514e-05			64.4832	1.59011e-05
64.8283	1.83724e-05			64.6023	1.58244e-05
64.9473	1.83993e-05			64.7213	1.58465e-05
65.0665	1.84304e-05			64.8405	1.59011e-05
65.1855	1.85782e-05			64.948	1.59232e-05
65.3047	1.83665e-05			65.0557	1.5942e-05
65.4122	1.85118e-05			65.1747	1.57889e-05
65.5197	1.84405e-05			65.2822	1.59127e-05
65.6388	1.84673e-05			65.4013	1.58055e-05
65.7578	1.85126e-05			65.5203	1.5857e-05
65.8768	1.85446e-05			65.628	1.57993e-05
65.996	1.85757e-05			65.7355	1.5667e-05
66.1035	1.85706e-05			65.8545	1.57499e-05
66.211	1.84144e-05			65.9622	1.57332e-05
66.3302	1.85832e-05			66.0812	1.58916e-05
66.4377	1.84808e-05			66.1888	1.58633e-05
66.5338	1.8422e-05			66.3078	1.58307e-05
66.6528	1.8406e-05			66.4268	1.58833e-05
66.7718	1.84564e-05			66.5343	1.58739e-05
66.891	1.83355e-05			66.6418	1.60187e-05
67.01	1.84782e-05			66.761	1.57647e-05
67.1292	1.84833e-05			66.88	1.57584e-05
67.2483	1.83674e-05			66.9992	1.5772e-05
67.3673	1.86076e-05			67.1182	1.55526e-05
67.4863	1.84908e-05			67.2373	1.58098e-05
67.5938	1.86092e-05			67.3563	1.57741e-05
67.713	1.85378e-05			67.4755	1.59127e-05
67.8205	1.85463e-05			67.583	1.57889e-05
67.9397	1.84816e-05			67.6905	1.58739e-05
68.0587	1.84993e-05			67.775	1.58307e-05
68.1662	1.85168e-05			67.8827	1.5773e-05
68.2852	1.83649e-05			68.0017	1.57195e-05
68.4043	1.85126e-05			68.1093	1.57783e-05
68.5233	1.8532e-05			68.2168	1.58014e-05
68.631	1.85387e-05			68.3358	1.57247e-05
68.7385	1.85841e-05			68.4548	1.57521e-05
68.8575	1.83665e-05			68.574	1.5921e-05
68.9767	1.85076e-05			68.693	1.58854e-05
69.0842	1.84152e-05			68.8122	1.57006e-05
69.1917	1.84086e-05			68.9312	1.58329e-05
69.2992	1.84279e-05			69.0272	1.57856e-05
69.4068	1.84842e-05			69.1348	1.5877e-05
69.5143	1.84472e-05			69.2423	1.58423e-05
69.6103	1.84858e-05			69.3615	1.58518e-05
69.7063	1.84598e-05			69.4805	1.57625e-05
69.8025	1.83749e-05			69.5997	1.58203e-05
69.91	1.82918e-05			69.7072	1.58004e-05
70.0292	1.85396e-05			69.8262	1.56765e-05
70.1482	1.84279e-05			69.9452	1.58276e-05
70.2557	1.86177e-05			70.0643	1.56995e-05
70.3633	1.8642e-05			70.1833	1.57625e-05
70.4823	1.86311e-05			70.291	1.59694e-05
70.59	1.84488e-05			70.41	1.59158e-05
70.709	1.84598e-05			70.529	1.57552e-05
70.828	1.86126e-05			70.6482	1.58319e-05
70.9355	1.86596e-05			70.7672	1.58465e-05
71.0432	1.84959e-05			70.8748	1.57112e-05
71.1622	1.85035e-05			70.9823	1.57625e-05
71.2697	1.84363e-05			71.0898	1.58465e-05
71.3773	1.84648e-05			71.1973	1.5729e-05
71.4848	1.84782e-05			71.3165	1.5771e-05
71.6038	1.85026e-05			71.4357	1.5793e-05
71.7115	1.8684e-05			71.5432	1.59442e-05
71.8305	1.84892e-05			71.6622	1.57468e-05
71.9497	1.84724e-05			71.7698	1.57741e-05
72.0687	1.84371e-05			71.8888	1.58665e-05
72.1877	1.85236e-05			71.9963	1.58979e-05
72.2953	1.85496e-05			72.1155	1.59285e-05
72.4143	1.84413e-05			72.2115	1.58423e-05
72.5335	1.84144e-05			72.3305	1.5751e-05
72.6295	1.8548e-05			72.4497	1.57993e-05
72.7485	1.86235e-05			72.5457	1.58885e-05
72.8677	1.8553e-05			72.6648	1.58319e-05
72.9867	1.84287e-05			72.7838	1.58382e-05
73.1058	1.8479e-05			72.903	1.5899e-05
73.2248	1.85647e-05			73.022	1.56429e-05
73.3325	1.85454e-05			73.1297	1.60145e-05
73.4515	1.86344e-05			73.2372	1.59767e-05
73.5705	1.83203e-05			73.3562	1.57174e-05
73.6897	1.848e-05			73.4752	1.57384e-05
73.8088	1.83716e-05			73.5943	1.58024e-05
73.9278	1.85446e-05			73.7133	1.59337e-05
74.0468	1.85236e-05			73.821	1.56523e-05
74.166	1.86395e-05			73.9285	1.58581e-05
74.285	1.84606e-05			74.0475	1.59515e-05
74.4042	1.85026e-05			74.1552	1.57447e-05
74.5117	1.86101e-05			74.2627	1.56869e-05
74.6192	1.85126e-05			74.3702	1.57962e-05
74.7383	1.85278e-05			74.4893	1.58035e-05
74.8573	1.85664e-05			74.5968	1.56912e-05
74.9533	1.8647e-05			74.716	1.58444e-05
75.0725	1.85975e-05			74.835	1.5646e-05
75.18	1.86084e-05			74.954	1.5835e-05
75.2992	1.84766e-05			75.0732	1.58402e-05
75.4067	1.84295e-05			75.1922	1.55977e-05
75.5142	1.86143e-05			75.3113	1.57572e-05
75.6333	1.85547e-05			75.4188	1.58759e-05
75.7408	1.84572e-05			75.5378	1.57804e-05
75.8598	1.8453e-05			75.6455	1.56366e-05
75.9788	1.84505e-05			75.7645	1.56586e-05
76.098	1.85505e-05			75.8835	1.55442e-05
76.217	1.86026e-05			75.9912	1.57048e-05
76.336	1.84875e-05			76.1102	1.55977e-05
76.4207	1.84791e-05			76.2293	1.5729e-05
76.5397	1.85614e-05			76.3368	1.55452e-05
76.6588	1.8469e-05			76.4328	1.55684e-05
76.7778	1.85345e-05			76.5518	1.57205e-05
76.8968	1.84429e-05			76.671	1.57992e-05
77.016	1.85438e-05			76.7902	1.55851e-05
77.1235	1.85606e-05			76.9092	1.54245e-05
77.2425	1.86437e-05			77.0282	1.56523e-05
77.3502	1.84438e-05			77.1473	1.59084e-05
77.4692	1.84908e-05			77.2663	1.58707e-05
77.5883	1.83262e-05			77.3855	1.59557e-05
77.7073	1.85127e-05			77.5045	1.57415e-05
77.8263	1.84514e-05			77.6235	1.58434e-05
77.9455	1.8684e-05			77.7427	1.57205e-05
78.0647	1.84858e-05			77.8618	1.57562e-05
78.1837	1.83598e-05			77.9693	1.59074e-05
78.2912	1.84514e-05			78.0768	1.56051e-05
78.3987	1.85438e-05			78.196	1.58402e-05
78.5063	1.85421e-05			78.315	1.56954e-05
78.6253	1.86059e-05			78.434	1.57489e-05
78.733	1.85395e-05			78.5415	1.58329e-05
78.852	1.85378e-05			78.6607	1.58529e-05
78.971	1.85202e-05			78.7797	1.56775e-05
79.0902	1.86798e-05			78.8873	1.573e-05
79.2092	1.86185e-05			78.9948	1.58214e-05
79.3283	1.85748e-05			79.114	1.57625e-05
79.4358	1.85144e-05			79.233	1.57195e-05
79.5548	1.85269e-05			79.3522	1.58371e-05
79.674	1.85782e-05			79.4597	1.57027e-05
79.7815	1.85387e-05			79.5787	1.57689e-05
79.8775	1.87101e-05			79.6863	1.5729e-05
79.985	1.85857e-05			79.8053	1.57458e-05
80.0927	1.86e-05			79.9243	1.57657e-05
80.2117	1.86269e-05			80.0435	1.5731e-05
80.3308	1.86966e-05			80.151	1.58455e-05
80.4383	1.85463e-05			80.2702	1.59399e-05
80.5575	1.86403e-05			80.3777	1.57919e-05
80.6765	1.85631e-05			80.4968	1.57154e-05
80.7955	1.85572e-05			80.6043	1.58739e-05
80.9032	1.87294e-05			80.7233	1.57237e-05
81.0107	1.85874e-05			80.8423	1.57469e-05
81.1297	1.83942e-05			80.9615	1.58109e-05
81.2488	1.85706e-05			81.0805	1.58329e-05
81.368	1.86278e-05			81.1882	1.59158e-05
81.4868	1.8427e-05			81.3072	1.58822e-05
81.5945	1.85706e-05			81.4263	1.57584e-05
81.7135	1.85253e-05			81.5223	1.58465e-05
81.8327	1.84841e-05			81.6413	1.57069e-05
81.9518	1.85681e-05			81.749	1.59158e-05
82.0593	1.85471e-05			81.868	1.58843e-05
82.1783	1.849e-05			81.9872	1.5793e-05
82.2975	1.8537e-05			82.1062	1.56092e-05
82.4165	1.85496e-05			82.2138	1.5899e-05
82.5242	1.8605e-05			82.3328	1.58276e-05
82.6432	1.84959e-05			82.4518	1.5793e-05
82.7622	1.85354e-05			82.571	1.59767e-05
82.8813	1.84665e-05			82.69	1.5941e-05
82.9888	1.84799e-05			82.809	1.58927e-05
83.0963	1.85958e-05			82.9165	1.57489e-05
83.2155	1.85849e-05			83.0357	1.56744e-05
83.3115	1.84438e-05			83.1548	1.57877e-05
83.419	1.84086e-05			83.2738	1.57982e-05
83.538	1.86143e-05			83.3698	1.59242e-05
83.6572	1.85219e-05			83.489	1.58067e-05
83.7762	1.86269e-05			83.608	1.573e-05
83.8608	1.84001e-05			83.7272	1.55715e-05
83.9568	1.84967e-05			83.8347	1.57846e-05
84.0758	1.84774e-05			83.9307	1.57489e-05
84.1835	1.85454e-05			84.0382	1.59064e-05
84.3025	1.84287e-05			84.1573	1.57804e-05
84.4217	1.85807e-05			84.2763	1.57321e-05
84.5292	1.84329e-05			84.3955	1.57227e-05
84.6367	1.85085e-05			84.503	1.59326e-05
84.7558	1.84144e-05			84.6222	1.5688e-05
84.8748	1.85614e-05			84.7297	1.55704e-05
84.9938	1.86236e-05			84.8487	1.5773e-05
85.113	1.84488e-05			84.9677	1.57079e-05
85.232	1.84119e-05			85.0868	1.57184e-05
85.351	1.85563e-05			85.2058	1.57836e-05
85.4702	1.85236e-05			85.3248	1.58906e-05
85.5777	1.85287e-05			85.4325	1.57825e-05
85.6853	1.84993e-05			85.5515	1.59127e-05
85.8043	1.8406e-05			85.6592	1.57384e-05
85.9118	1.84152e-05			85.7782	1.56565e-05
86.031	1.8322e-05			85.8973	1.57941e-05
86.15	1.84522e-05			86.0048	1.59316e-05
86.2575	1.84959e-05			86.1123	1.5729e-05
86.3767	1.85496e-05			86.2085	1.58497e-05
86.4958	1.85278e-05			86.3275	1.57426e-05
86.6148	1.85648e-05			86.4467	1.56901e-05
86.7223	1.84337e-05			86.5657	1.57258e-05
86.8413	1.84933e-05			86.6848	1.58098e-05
86.9605	1.8506e-05			86.7923	1.58906e-05
87.0797	1.84984e-05			86.8998	1.57059e-05
87.1985	1.84874e-05			87.0075	1.59315e-05
87.3177	1.85127e-05			87.1265	1.57867e-05
87.4252	1.86252e-05			87.2457	1.57111e-05
87.5443	1.8485e-05			87.3647	1.57258e-05
87.6633	1.83422e-05			87.4722	1.57458e-05
87.7825	1.84051e-05			87.5913	1.57794e-05
87.9015	1.85488e-05			87.7103	1.5731e-05
88.0205	1.86454e-05			87.8295	1.573e-05
88.128	1.84018e-05			87.9485	1.56922e-05
88.2472	1.83984e-05			88.0677	1.56408e-05
88.3663	1.8516e-05			88.1867	1.5814e-05
88.4852	1.85068e-05			88.3057	1.58979e-05
88.5928	1.85136e-05			88.4132	1.57038e-05
88.7003	1.8637e-05			88.5093	1.56608e-05
88.7963	1.83909e-05			88.6283	1.56209e-05
88.904	1.84959e-05			88.736	1.57227e-05
89.023	1.85539e-05			88.855	1.58727e-05
89.1422	1.84933e-05			88.974	1.59547e-05
89.2612	1.85102e-05			89.0932	1.594e-05
89.3803	1.85421e-05			89.2122	1.56797e-05
89.4993	1.85841e-05			89.3313	1.55999e-05
89.6185	1.85496e-05			89.4503	1.56765e-05
89.7375	1.86689e-05			89.5693	1.59315e-05
89.8452	1.85269e-05			89.6885	1.56922e-05
89.9642	1.84598e-05			89.7847	1.58319e-05
90.0833	1.85983e-05			89.9037	1.58045e-05
90.2023	1.84598e-05			90.0112	1.57909e-05
90.3213	1.87092e-05			90.1188	1.58412e-05
90.429	1.84975e-05			90.2378	1.57426e-05
90.548	1.86614e-05			90.3568	1.58224e-05
90.6672	1.85807e-05			90.476	1.57825e-05
90.7747	1.82843e-05			90.5835	1.59022e-05
90.8822	1.84463e-05			90.7027	1.56681e-05
91.0013	1.84976e-05			90.8102	1.59348e-05
91.1203	1.85841e-05			90.9293	1.58843e-05
91.2393	1.84581e-05			91.0482	1.58172e-05
91.3468	1.83791e-05			91.1558	1.57835e-05
91.466	1.83598e-05			91.2748	1.58319e-05
91.5852	1.84791e-05			91.394	1.57332e-05
91.6812	1.84228e-05			91.513	1.57637e-05
91.7887	1.83825e-05			91.6207	1.56135e-05
91.8963	1.84405e-05			91.7397	1.57111e-05
92.0038	1.85857e-05			91.8588	1.58266e-05
92.123	1.84396e-05			91.9778	1.58602e-05
92.242	1.8511e-05			92.0968	1.56817e-05
92.3495	1.86e-05			92.216	1.57856e-05
92.4572	1.84396e-05			92.335	1.5792e-05
92.5762	1.85857e-05			92.454	1.58864e-05
92.6838	1.85538e-05			92.5615	1.57364e-05
92.8027	1.86008e-05			92.6807	1.57762e-05
92.9103	1.86739e-05			92.7882	1.56482e-05
93.0293	1.8553e-05			92.9073	1.55862e-05
93.1368	1.84749e-05			93.0148	1.57332e-05
93.2445	1.85219e-05			93.134	1.57857e-05
93.3522	1.84715e-05			93.2415	1.58319e-05
93.4597	1.85018e-05			93.3605	1.55631e-05
93.5787	1.86059e-05			93.4797	1.58055e-05
93.6977	1.8506e-05			93.5872	1.58109e-05
93.8168	1.85446e-05			93.7063	1.5708e-05
93.9358	1.85614e-05			93.8253	1.57825e-05
94.0435	1.84791e-05			93.9443	1.56964e-05
94.1625	1.84236e-05			94.0635	1.56155e-05
94.2817	1.85186e-05			94.1827	1.58633e-05
94.4007	1.84942e-05			94.3017	1.57279e-05
94.5083	1.84488e-05			94.4207	1.57384e-05
94.6272	1.85547e-05			94.5398	1.58865e-05
94.7463	1.85698e-05			94.6588	1.58664e-05
94.8538	1.84245e-05			94.7663	1.5856e-05
94.973	1.85244e-05			94.8855	1.57027e-05
95.092	1.84942e-05			95.0045	1.57059e-05
95.1995	1.84463e-05			95.1122	1.571e-05
95.3185	1.84774e-05			95.2312	1.56124e-05
95.4147	1.8537e-05			95.3502	1.58602e-05
95.5108	1.84707e-05			95.4693	1.57794e-05
95.6298	1.83262e-05			95.5883	1.55316e-05
95.7488	1.85118e-05			95.7073	1.57437e-05
95.868	1.84875e-05			95.815	1.56838e-05
95.964	1.85051e-05			95.934	1.58014e-05
96.0715	1.83683e-05			96.053	1.58098e-05
96.1905	1.85387e-05			96.1722	1.56439e-05
96.2982	1.85127e-05			96.2913	1.56229e-05
96.4057	1.8469e-05			96.3988	1.56733e-05
96.5133	1.8474e-05			96.4948	1.5878e-05
96.6323	1.83942e-05			96.6023	1.56849e-05
96.7513	1.8569e-05			96.71	1.58245e-05
96.8705	1.84866e-05			96.829	1.57028e-05
96.9895	1.85202e-05			96.9482	1.5731e-05
97.0972	1.84909e-05			97.0672	1.57237e-05
97.2162	1.84866e-05			97.1863	1.55946e-05
97.3352	1.85815e-05			97.3053	1.56985e-05
97.4427	1.8521e-05			97.4243	1.57247e-05
97.5618	1.85211e-05			97.5435	1.56482e-05
97.681	1.85043e-05			97.6625	1.57049e-05
97.8	1.85354e-05			97.7702	1.56701e-05
97.9192	1.84942e-05			97.8892	1.5687e-05
98.0267	1.84573e-05			98.0082	1.57899e-05
98.1342	1.84967e-05			98.1043	1.57164e-05
98.2418	1.84195e-05			98.2003	1.58833e-05
98.3493	1.85378e-05			98.3193	1.58833e-05
98.4683	1.85093e-05			98.4385	1.57499e-05
98.5875	1.84975e-05			98.5575	1.57037e-05
98.695	1.85009e-05			98.6765	1.57247e-05
98.8142	1.86353e-05			98.7957	1.58109e-05
98.9332	1.84959e-05			98.9032	1.5603e-05
99.0522	1.85253e-05			99.0223	1.57552e-05
99.1598	1.83489e-05			99.1413	1.5814e-05
99.2788	1.84539e-05			99.2488	1.57468e-05
99.3863	1.84757e-05			99.368	1.59064e-05
99.5055	1.84842e-05			99.487	1.57121e-05
99.6245	1.85144e-05			99.6062	1.57185e-05
99.7435	1.84993e-05			99.7137	1.57468e-05
99.8627	1.84598e-05			99.8327	1.57363e-05
99.9587	1.84152e-05			99.9403	1.56334e-05
100.078	1.85017e-05			100.059	1.57751e-05
100.197	1.8605e-05			100.178	1.58287e-05
100.304	1.85698e-05			100.297	1.58486e-05
100.424	1.84505e-05			100.416	1.57972e-05
100.543	1.8548e-05			100.536	1.58707e-05
100.662	1.86218e-05			100.643	1.5836e-05
100.769	1.85035e-05			100.762	1.56575e-05
100.888	1.83951e-05			100.87	1.5688e-05
101.007	1.86193e-05			100.989	1.58067e-05
101.126	1.84413e-05			101.097	1.57436e-05
101.234	1.84749e-05			101.216	1.57217e-05
101.353	1.84631e-05			101.323	1.5561e-05
101.472	1.85001e-05			101.442	1.57059e-05
101.579	1.86261e-05			101.561	1.57405e-05
101.698	1.84472e-05			101.669	1.57489e-05
101.818	1.84908e-05			101.788	1.55557e-05
101.937	1.84287e-05			101.907	1.57468e-05
102.044	1.85765e-05			102.026	1.56303e-05
102.163	1.84993e-05			102.145	1.59085e-05
102.282	1.84262e-05			102.264	1.571e-05
102.401	1.84446e-05			102.383	1.58938e-05
102.52	1.86286e-05			102.502	1.58644e-05
102.64	1.85438e-05			102.61	1.56019e-05
102.759	1.83691e-05			102.729	1.56314e-05
102.878	1.84547e-05			102.848	1.57121e-05
102.997	1.84866e-05			102.967	1.55851e-05
103.104	1.85085e-05			103.086	1.56208e-05
103.224	1.84657e-05			103.205	1.56691e-05
103.331	1.849e-05			103.324	1.5582e-05
103.439	1.85118e-05			103.443	1.57384e-05
103.546	1.84951e-05			103.562	1.5667e-05
103.654	1.85278e-05			103.67	1.5857e-05
103.773	1.86622e-05			103.777	1.55904e-05
103.88	1.8333e-05			103.885	1.55274e-05
103.999	1.8448e-05			103.993	1.56114e-05
104.118	1.86059e-05			104.1	1.58067e-05
104.237	1.8385e-05			104.219	1.56827e-05
104.357	1.84691e-05			104.338	1.57625e-05
104.476	1.83884e-05			104.457	1.57804e-05
104.583	1.85623e-05			104.576	1.57888e-05
104.702	1.8385e-05			104.695	1.57952e-05
104.81	1.8422e-05			104.803	1.56596e-05
104.929	1.85144e-05			104.922	1.58518e-05
105.048	1.84413e-05			105.041	1.56607e-05
105.167	1.84254e-05			105.16	1.56817e-05
105.286	1.84514e-05			105.279	1.58591e-05
105.405	1.84144e-05			105.387	1.5857e-05
105.524	1.84967e-05			105.506	1.57825e-05
105.643	1.849e-05			105.614	1.55862e-05
105.751	1.84102e-05			105.733	1.5688e-05
105.87	1.84547e-05			105.84	1.56482e-05
105.978	1.84379e-05			105.948	1.56545e-05
106.097	1.84254e-05			106.055	1.57594e-05
106.216	1.84908e-05			106.174	1.56135e-05
106.323	1.84648e-05			106.282	1.57289e-05
106.442	1.85379e-05			106.401	1.56575e-05
106.561	1.8485e-05			106.52	1.57447e-05
106.68	1.83934e-05			106.639	1.56512e-05
106.799	1.84455e-05			106.746	1.57479e-05
106.918	1.84917e-05			106.866	1.57247e-05
107.037	1.85043e-05			106.973	1.57572e-05
107.156	1.85866e-05			107.092	1.56271e-05
107.275	1.85093e-05			107.211	1.57751e-05
107.395	1.84505e-05			107.331	1.56797e-05
107.514	1.83942e-05			107.45	1.54539e-05
107.633	1.84237e-05			107.569	1.55138e-05
107.752	1.85748e-05			107.688	1.55747e-05
107.871	1.83725e-05			107.795	1.56796e-05
107.99	1.83833e-05			107.903	1.56565e-05
108.086	1.84774e-05			108.01	1.56954e-05
108.205	1.83489e-05			108.129	1.57877e-05
108.313	1.8343e-05			108.237	1.57059e-05
108.432	1.84363e-05			108.344	1.57153e-05
108.551	1.83674e-05			108.452	1.56964e-05
108.67	1.84194e-05			108.571	1.58067e-05
108.778	1.83497e-05			108.69	1.58203e-05
108.897	1.8322e-05			108.809	1.57667e-05
109.016	1.83615e-05			108.917	1.56429e-05
109.135	1.84648e-05			109.036	1.5666e-05
109.242	1.84463e-05			109.155	1.55358e-05
109.361	1.8448e-05			109.274	1.57164e-05
109.48	1.84144e-05			109.393	1.56019e-05
109.588	1.84194e-05			109.512	1.56943e-05
109.707	1.84329e-05			109.631	1.56429e-05
109.814	1.85631e-05			109.739	1.58349e-05
109.934	1.84782e-05			109.846	1.57689e-05
110.053	1.85094e-05			109.965	1.55547e-05
110.172	1.83346e-05			110.084	1.56145e-05
110.291	1.84749e-05			110.192	1.56838e-05
110.41	1.85765e-05			110.3	1.56513e-05
110.529	1.84304e-05			110.419	1.57111e-05
110.648	1.84186e-05			110.538	1.5667e-05
110.767	1.84405e-05			110.657	1.5689e-05
110.875	1.84505e-05			110.764	1.56188e-05
110.994	1.84699e-05			110.883	1.5583e-05
111.113	1.84572e-05			111.002	1.57415e-05
111.22	1.83699e-05			111.099	1.56965e-05
111.316	1.84278e-05			111.206	1.5689e-05
111.436	1.84362e-05			111.325	1.55946e-05
111.543	1.85018e-05			111.444	1.56082e-05
111.65	1.85631e-05			111.552	1.59084e-05
111.758	1.83733e-05			111.671	1.55935e-05
111.877	1.82683e-05			111.767	1.56009e-05
111.985	1.84514e-05			111.886	1.56082e-05
112.104	1.85211e-05			112.005	1.55904e-05
112.223	1.84287e-05			112.112	1.55589e-05
112.342	1.8495e-05			112.22	1.55516e-05
112.461	1.84572e-05			112.328	1.55914e-05
112.58	1.8574e-05			112.447	1.56754e-05
112.699	1.83573e-05			112.554	1.56093e-05
112.818	1.84195e-05			112.65	1.56786e-05
112.937	1.84111e-05			112.769	1.55348e-05
113.033	1.85396e-05			112.888	1.55085e-05
113.152	1.84892e-05			113.007	1.5689e-05
113.272	1.84446e-05			113.126	1.56544e-05
113.379	1.83749e-05			113.246	1.55883e-05
113.498	1.8291e-05			113.365	1.56786e-05
113.617	1.84035e-05			113.472	1.5582e-05
113.736	1.85698e-05			113.591	1.55558e-05
113.844	1.84346e-05			113.71	1.56513e-05
113.963	1.84094e-05			113.818	1.56734e-05
114.07	1.83506e-05			113.937	1.5689e-05
114.189	1.85043e-05			114.045	1.57773e-05
114.308	1.8327e-05			114.152	1.56702e-05
114.427	1.85462e-05			114.271	1.56681e-05
114.547	1.83674e-05			114.367	1.54875e-05
114.654	1.83817e-05			114.486	1.56051e-05
114.773	1.83682e-05			114.606	1.57562e-05
114.881	1.83968e-05			114.725	1.56229e-05
115	1.85144e-05			114.832	1.56282e-05
115.108	1.84665e-05			114.951	1.57332e-05
115.215	1.83531e-05			115.07	1.58402e-05
115.334	1.85471e-05			115.189	1.57164e-05
115.442	1.83842e-05			115.297	1.56062e-05
115.561	1.84984e-05			115.404	1.57217e-05
115.657	1.84572e-05			115.523	1.55179e-05
115.776	1.83615e-05			115.642	1.55694e-05
115.895	1.84194e-05			115.762	1.56177e-05
116.014	1.84531e-05			115.881	1.57017e-05
116.133	1.84589e-05			115.988	1.573e-05
116.252	1.84572e-05			116.096	1.56565e-05
116.371	1.85227e-05			116.215	1.57321e-05
116.49	1.83052e-05			116.334	1.55704e-05
116.609	1.84438e-05			116.453	1.57857e-05
116.717	1.85891e-05			116.572	1.56408e-05
116.836	1.85589e-05			116.691	1.57227e-05
116.955	1.83347e-05			116.81	1.5645e-05
117.074	1.83204e-05			116.918	1.5647e-05
117.193	1.83455e-05			117.037	1.56786e-05
117.301	1.83296e-05			117.144	1.56534e-05
117.42	1.81969e-05			117.263	1.55579e-05
117.539	1.82531e-05			117.383	1.56502e-05
117.658	1.83665e-05			117.502	1.56009e-05
117.765	1.84043e-05			117.621	1.57615e-05
117.885	1.8369e-05			117.728	1.56061e-05
118.004	1.83598e-05			117.847	1.55505e-05
118.123	1.82934e-05			117.966	1.56072e-05
118.242	1.83506e-05			118.062	1.58402e-05
118.361	1.83842e-05			118.159	1.55547e-05
118.48	1.82876e-05			118.278	1.56849e-05
118.599	1.84178e-05			118.397	1.57521e-05
118.707	1.82943e-05			118.516	1.56565e-05
118.802	1.82666e-05			118.635	1.5793e-05
118.921	1.83691e-05			118.754	1.57521e-05
119.041	1.84228e-05			118.862	1.56439e-05
119.16	1.83464e-05			118.981	1.55295e-05
119.279	1.83725e-05			119.1	1.56208e-05
119.398	1.83539e-05			119.219	1.57562e-05
119.505	1.84497e-05			119.315	1.56786e-05
119.613	1.84833e-05			119.422	1.57374e-05
119.732	1.84463e-05			119.541	1.57027e-05
119.851	1.83338e-05			119.66	1.57342e-05
119.97	1.83615e-05			119.779	1.56534e-05
120.089	1.85102e-05			119.898	1.57751e-05
120.208	1.839e-05			120.018	1.56912e-05
120.327	1.84363e-05			120.137	1.56019e-05
120.446	1.86269e-05			120.244	1.56219e-05
120.566	1.83732e-05			120.363	1.56807e-05
120.673	1.83061e-05			120.459	1.57111e-05
120.792	1.84548e-05			120.555	1.55935e-05
120.888	1.84144e-05			120.663	1.58287e-05
121.007	1.83363e-05			120.782	1.57562e-05
121.126	1.85311e-05			120.878	1.57154e-05
121.245	1.83027e-05			120.997	1.57142e-05
121.365	1.83061e-05			121.105	1.55105e-05
121.484	1.82624e-05			121.224	1.56576e-05
121.603	1.84539e-05			121.343	1.5772e-05
121.722	1.84657e-05			121.462	1.58613e-05
121.841	1.85076e-05			121.581	1.55369e-05
121.96	1.83413e-05			121.689	1.57605e-05
122.079	1.83011e-05			121.808	1.57951e-05
122.186	1.84111e-05			121.927	1.56849e-05
122.305	1.83724e-05			122.046	1.57667e-05
122.424	1.8343e-05			122.165	1.57269e-05
122.543	1.83405e-05			122.284	1.55095e-05
122.663	1.84799e-05			122.403	1.57216e-05
122.782	1.83464e-05			122.499	1.57205e-05
122.901	1.83405e-05			122.618	1.56072e-05
122.997	1.83649e-05			122.737	1.58203e-05
123.116	1.84522e-05			122.856	1.55589e-05
123.235	1.85076e-05			122.975	1.56586e-05
123.343	1.84085e-05			123.083	1.57562e-05
123.462	1.84497e-05			123.202	1.55673e-05
123.581	1.85714e-05			123.321	1.56145e-05
123.688	1.83212e-05			123.44	1.57762e-05
123.796	1.84488e-05			123.525	1.57185e-05
123.915	1.83136e-05			123.644	1.56775e-05
124.022	1.82187e-05			123.74	1.56565e-05
124.141	1.84354e-05			123.859	1.55925e-05
124.26	1.84699e-05			123.978	1.56764e-05
124.379	1.83934e-05			124.097	1.56082e-05
124.487	1.82632e-05			124.204	1.56797e-05
124.606	1.84052e-05			124.312	1.55872e-05
124.725	1.83531e-05			124.42	1.57227e-05
124.844	1.82414e-05			124.539	1.58665e-05
124.952	1.83489e-05			124.658	1.57132e-05
125.071	1.84001e-05			124.777	1.56617e-05
125.19	1.83279e-05			124.884	1.57993e-05
125.309	1.82624e-05			124.992	1.57562e-05
125.428	1.82523e-05			125.111	1.57635e-05
125.536	1.84212e-05			125.23	1.55946e-05
125.655	1.83976e-05			125.349	1.57772e-05
125.774	1.84194e-05			125.457	1.5645e-05
125.893	1.84228e-05			125.576	1.57594e-05
126.001	1.83951e-05			125.695	1.569e-05
126.108	1.83707e-05			125.802	1.56765e-05
126.227	1.84212e-05			125.921	1.55505e-05
126.346	1.84195e-05			126.029	1.56901e-05
126.465	1.83523e-05			126.148	1.57332e-05
126.573	1.83136e-05			126.267	1.57909e-05
126.692	1.8422e-05			126.386	1.57395e-05
126.811	1.84295e-05			126.505	1.55064e-05
126.918	1.85026e-05			126.624	1.57027e-05
127.037	1.84337e-05			126.743	1.58686e-05
127.145	1.83187e-05			126.851	1.554e-05
127.253	1.83363e-05			126.97	1.56303e-05
127.372	1.84917e-05			127.078	1.56019e-05
127.491	1.83808e-05			127.185	1.56019e-05
127.61	1.8338e-05			127.293	1.5772e-05
127.729	1.84051e-05			127.4	1.56618e-05
127.848	1.82825e-05			127.519	1.55861e-05
127.967	1.83766e-05			127.638	1.554e-05
128.075	1.84909e-05			127.746	1.56649e-05
128.182	1.84287e-05			127.865	1.55672e-05
128.301	1.82977e-05			127.984	1.56261e-05
128.42	1.83262e-05			128.092	1.55631e-05
128.516	1.83128e-05			128.211	1.55945e-05
128.624	1.83876e-05			128.318	1.5774e-05
128.743	1.84069e-05			128.437	1.56355e-05
128.862	1.83632e-05			128.556	1.56271e-05
128.981	1.84102e-05			128.675	1.56482e-05
129.077	1.82397e-05			128.795	1.57762e-05
129.173	1.83506e-05			128.914	1.55914e-05
129.281	1.83069e-05			129.033	1.57562e-05
129.388	1.82885e-05			129.152	1.56754e-05
129.496	1.84245e-05			129.271	1.5709e-05
129.603	1.83095e-05			129.39	1.55568e-05
129.711	1.83304e-05			129.509	1.58255e-05
129.819	1.8301e-05			129.617	1.55989e-05
129.938	1.84144e-05			129.736	1.58497e-05
130.045	1.84346e-05			129.855	1.58098e-05
130.153	1.84136e-05			129.974	1.56219e-05
130.26	1.83405e-05			130.081	1.56303e-05
130.356	1.83514e-05			130.2	1.56734e-05
130.475	1.83884e-05			130.319	1.57405e-05
130.594	1.83288e-05			130.427	1.57279e-05
130.702	1.82582e-05			130.546	1.58349e-05
130.821	1.83145e-05			130.665	1.54633e-05
130.929	1.82876e-05			130.784	1.55347e-05
131.036	1.81557e-05			130.892	1.57332e-05
131.132	1.83388e-05			130.999	1.55327e-05
131.251	1.83909e-05			131.118	1.57993e-05
131.37	1.8453e-05			131.237	1.5773e-05
131.478	1.84228e-05			131.357	1.55662e-05
131.597	1.83699e-05			131.476	1.55684e-05
131.716	1.82296e-05			131.595	1.56513e-05
131.835	1.83918e-05			131.714	1.57542e-05
131.954	1.83481e-05			131.821	1.57699e-05
132.073	1.82868e-05			131.94	1.57342e-05
132.192	1.82893e-05			132.048	1.56345e-05
132.311	1.83707e-05			132.167	1.57079e-05
132.419	1.83968e-05			132.274	1.57027e-05
132.538	1.8343e-05			132.382	1.57615e-05
132.657	1.8401e-05			132.501	1.57405e-05
132.776	1.83867e-05			132.62	1.56765e-05
132.884	1.83431e-05			132.739	1.56482e-05
132.991	1.82682e-05			132.847	1.57384e-05
133.11	1.83792e-05			132.966	1.59462e-05
133.229	1.83884e-05			133.085	1.55757e-05
133.348	1.83237e-05			133.192	1.56355e-05
133.468	1.83531e-05			133.311	1.57142e-05
133.587	1.85227e-05			133.43	1.57709e-05
133.706	1.83758e-05			133.55	1.57205e-05
133.825	1.84077e-05			133.657	1.55809e-05
133.944	1.84119e-05			133.753	1.56334e-05
134.051	1.82733e-05			133.872	1.56555e-05
134.17	1.82842e-05			133.991	1.56733e-05
134.289	1.84051e-05			134.11	1.56817e-05
134.409	1.827e-05			134.207	1.57112e-05
134.528	1.83649e-05			134.326	1.55672e-05
134.635	1.84295e-05			134.433	1.56586e-05
134.754	1.8406e-05			134.552	1.56712e-05
134.873	1.84732e-05			134.66	1.56482e-05
134.981	1.85118e-05			134.779	1.57237e-05
135.088	1.84656e-05			134.898	1.569e-05
135.196	1.83817e-05			135.017	1.57038e-05
135.315	1.84119e-05			135.113	1.57867e-05
135.423	1.82775e-05			135.22	1.56797e-05
135.542	1.81482e-05			135.328	1.54592e-05
135.649	1.84539e-05			135.447	1.56954e-05
135.757	1.83674e-05			135.566	1.5604e-05
135.853	1.84102e-05			135.685	1.56775e-05
135.949	1.83573e-05			135.804	1.57426e-05
136.056	1.8317e-05			135.912	1.56765e-05
136.175	1.82876e-05			136.031	1.54781e-05
136.294	1.83985e-05			136.15	1.57185e-05
136.402	1.83707e-05			136.246	1.57667e-05
136.521	1.84119e-05			136.365	1.575e-05
136.64	1.82658e-05			136.484	1.54675e-05
136.759	1.83817e-05			136.603	1.56975e-05
136.878	1.84061e-05			136.722	1.56261e-05
136.998	1.83245e-05			136.841	1.56933e-05
137.117	1.82532e-05			136.96	1.5541e-05
137.236	1.8364e-05			137.079	1.57154e-05
137.355	1.84782e-05			137.187	1.57237e-05
137.474	1.82885e-05			137.306	1.58171e-05
137.593	1.84715e-05			137.425	1.57436e-05
137.689	1.82548e-05			137.544	1.56837e-05
137.785	1.82582e-05			137.663	1.55767e-05
137.893	1.82112e-05			137.782	1.56114e-05
138.012	1.8327e-05			137.89	1.57772e-05
138.119	1.83002e-05			137.998	1.5815e-05
138.227	1.8406e-05			138.117	1.56734e-05
138.334	1.8385e-05			138.224	1.56271e-05
138.453	1.83876e-05			138.343	1.56859e-05
138.572	1.83288e-05			138.439	1.57637e-05
138.691	1.85815e-05			138.535	1.56975e-05
138.799	1.82952e-05			138.654	1.5624e-05
138.918	1.8495e-05			138.762	1.56744e-05
139.037	1.8254e-05			138.881	1.55998e-05
139.156	1.82624e-05			138.988	1.57499e-05
139.275	1.83203e-05			139.108	1.56859e-05
139.383	1.8333e-05			139.227	1.58613e-05
139.49	1.83422e-05			139.346	1.54633e-05
139.609	1.83993e-05			139.465	1.55987e-05
139.728	1.82078e-05			139.584	1.5774e-05
139.847	1.8364e-05			139.691	1.57899e-05
139.955	1.83573e-05			139.81	1.5752e-05
140.074	1.83657e-05			139.93	1.56565e-05
140.17	1.83867e-05			140.037	1.57353e-05
140.289	1.84581e-05			140.145	1.58739e-05
140.408	1.84178e-05			140.264	1.56512e-05
140.527	1.82817e-05			140.383	1.5645e-05
140.646	1.83884e-05			140.502	1.56827e-05
140.766	1.84539e-05			140.621	1.5584e-05
140.873	1.82649e-05			140.74	1.56439e-05
140.981	1.8474e-05			140.859	1.55914e-05
141.1	1.83002e-05			140.978	1.56995e-05
141.207	1.83506e-05			141.086	1.57227e-05
141.326	1.83405e-05			141.205	1.5581e-05
141.445	1.82498e-05			141.301	1.57279e-05
141.553	1.84379e-05			141.42	1.56817e-05
141.672	1.83598e-05			141.539	1.56617e-05
141.791	1.84438e-05			141.658	1.57867e-05
141.91	1.83498e-05			141.777	1.55893e-05
142.029	1.83069e-05			141.896	1.552e-05
142.148	1.84463e-05			142.015	1.56597e-05
142.256	1.83556e-05			142.134	1.5604e-05
142.363	1.82692e-05			142.253	1.57142e-05
142.471	1.83985e-05			142.372	1.56534e-05
142.59	1.83506e-05			142.492	1.56943e-05
142.709	1.82935e-05			142.587	1.55904e-05
142.828	1.84186e-05			142.707	1.55368e-05
142.947	1.83682e-05			142.814	1.55935e-05
143.066	1.84312e-05			142.933	1.57227e-05
143.185	1.84152e-05			143.052	1.5729e-05
143.304	1.83187e-05			143.16	1.58697e-05
143.412	1.84388e-05			143.279	1.54854e-05
143.519	1.82716e-05			143.398	1.55778e-05
143.638	1.84069e-05			143.506	1.56177e-05
143.758	1.82851e-05			143.625	1.55652e-05
143.877	1.82843e-05			143.744	1.57436e-05
143.984	1.8359e-05			143.863	1.55684e-05
144.103	1.82616e-05			143.982	1.56429e-05
144.222	1.82246e-05			144.101	1.56596e-05
144.341	1.82246e-05			144.22	1.55442e-05
144.46	1.8254e-05			144.339	1.55579e-05
144.58	1.8385e-05			144.446	1.55537e-05
144.687	1.83077e-05			144.565	1.56628e-05
144.795	1.83422e-05			144.685	1.57562e-05
144.902	1.83262e-05			144.804	1.54602e-05
145.021	1.83044e-05			144.923	1.56639e-05
145.129	1.83212e-05			145.042	1.55999e-05
145.248	1.83354e-05			145.161	1.58938e-05
145.356	1.8422e-05			145.28	1.58045e-05
145.475	1.83187e-05			145.399	1.57332e-05
145.594	1.82658e-05			145.506	1.57227e-05
145.713	1.83279e-05			145.626	1.57227e-05
145.832	1.84228e-05			145.745	1.55453e-05
145.951	1.82238e-05			145.864	1.56545e-05
146.07	1.84337e-05			145.983	1.56639e-05
146.189	1.84119e-05			146.102	1.54507e-05
146.297	1.83775e-05			146.221	1.55242e-05
146.416	1.83153e-05			146.34	1.54424e-05
146.535	1.83775e-05			146.459	1.54592e-05
146.642	1.82817e-05			146.578	1.54225e-05
146.75	1.83422e-05			146.697	1.53626e-05
146.869	1.82783e-05			146.816	1.55924e-05
146.988	1.83052e-05			146.935	1.56596e-05
147.095	1.8291e-05			147.054	1.55053e-05
147.192	1.83288e-05			147.173	1.54707e-05
147.311	1.83473e-05			147.292	1.53269e-05
147.43	1.83825e-05			147.388	1.5413e-05
147.537	1.83145e-05			147.496	1.53027e-05
147.645	1.83514e-05			147.592	1.55032e-05
147.764	1.84354e-05			147.711	1.55631e-05
147.871	1.83229e-05			147.819	1.55054e-05
147.979	1.83119e-05			147.938	1.55316e-05
148.098	1.82582e-05			148.057	1.55001e-05
148.217	1.8338e-05			148.176	1.53951e-05
148.336	1.84051e-05			148.284	1.53584e-05
148.455	1.82473e-05			148.391	1.57069e-05
148.574	1.82632e-05			148.499	1.54287e-05
148.693	1.83069e-05			148.606	1.55284e-05
148.812	1.83581e-05			148.714	1.54612e-05
148.931	1.81977e-05			148.833	1.56555e-05
149.05	1.83187e-05			148.952	1.55672e-05
149.17	1.83237e-05			149.06	1.57437e-05
149.289	1.82473e-05			149.179	1.54897e-05
149.408	1.84169e-05			149.298	1.53332e-05
149.515	1.83212e-05			149.405	1.55316e-05
149.634	1.84791e-05			149.524	1.55305e-05
149.742	1.83489e-05			149.62	1.55012e-05
149.861	1.82893e-05			149.739	1.55274e-05
149.969	1.84799e-05			149.847	1.54675e-05
150.076	1.8118e-05			149.966	1.55725e-05
150.195	1.82716e-05			150.085	1.54539e-05
150.314	1.83447e-05			150.204	1.54455e-05
150.433	1.84732e-05			150.323	1.5434e-05
150.553	1.83842e-05			150.442	1.53237e-05
150.66	1.82322e-05			150.561	1.55305e-05
150.779	1.83128e-05			150.68	1.55558e-05
150.898	1.83506e-05			150.799	1.55368e-05
151.006	1.82985e-05			150.918	1.55012e-05
151.125	1.8338e-05			151.037	1.53752e-05
151.232	1.84228e-05			151.156	1.55274e-05
151.351	1.83145e-05			151.276	1.5626e-05
151.47	1.82985e-05			151.395	1.53731e-05
151.589	1.84152e-05			151.514	1.53122e-05
151.708	1.83951e-05			151.633	1.54455e-05
151.828	1.85152e-05			151.752	1.5582e-05
151.947	1.82338e-05			151.86	1.5584e-05
152.054	1.83246e-05			151.979	1.52818e-05
152.173	1.82448e-05			152.098	1.54424e-05
152.281	1.82968e-05			152.205	1.53279e-05
152.377	1.83707e-05			152.324	1.55012e-05
152.496	1.8254e-05			152.432	1.54192e-05
152.615	1.83027e-05			152.551	1.53625e-05
152.723	1.84657e-05			152.67	1.54613e-05
152.83	1.8406e-05			152.789	1.54308e-05
152.938	1.82313e-05			152.908	1.56019e-05
153.057	1.83355e-05			153.027	1.53153e-05
153.164	1.81583e-05			153.146	1.55085e-05
153.272	1.82398e-05			153.265	1.54162e-05
153.379	1.84236e-05			153.384	1.55075e-05
153.499	1.83103e-05			153.492	1.53164e-05
153.606	1.8359e-05			153.6	1.54235e-05
153.725	1.8327e-05			153.719	1.56702e-05
153.833	1.82431e-05			153.838	1.55327e-05
153.952	1.84639e-05			153.957	1.54035e-05
154.071	1.82078e-05			154.076	1.54529e-05
154.178	1.8254e-05			154.195	1.53574e-05
154.286	1.82666e-05			154.314	1.53762e-05
154.405	1.82473e-05			154.433	1.53762e-05
154.524	1.82549e-05			154.552	1.54917e-05
154.632	1.83254e-05			154.66	1.53132e-05
154.739	1.83103e-05			154.767	1.54759e-05
154.847	1.83296e-05			154.886	1.53615e-05
154.966	1.83909e-05			155.005	1.54403e-05
155.085	1.81809e-05			155.124	1.5542e-05
155.204	1.83271e-05			155.244	1.54119e-05
155.311	1.82616e-05			155.363	1.5561e-05
155.43	1.84161e-05			155.482	1.55704e-05
155.55	1.83145e-05			155.601	1.54214e-05
155.669	1.83716e-05			155.708	1.53972e-05
155.788	1.83212e-05			155.816	1.54444e-05
155.895	1.82783e-05			155.935	1.54508e-05
156.014	1.83506e-05			156.054	1.54067e-05
156.133	1.83011e-05			156.173	1.54235e-05
156.241	1.82632e-05			156.28	1.52292e-05
156.349	1.82171e-05			156.4	1.54297e-05
156.456	1.83725e-05			156.519	1.54959e-05
156.575	1.83019e-05			156.626	1.535e-05
156.694	1.84984e-05			156.722	1.55442e-05
156.813	1.83002e-05			156.841	1.54214e-05
156.932	1.82515e-05			156.949	1.52544e-05
157.051	1.81952e-05			157.068	1.52355e-05
157.171	1.82406e-05			157.187	1.53857e-05
157.29	1.81431e-05			157.306	1.56586e-05
157.386	1.83397e-05			157.425	1.531e-05
157.505	1.82381e-05			157.544	1.54424e-05
157.624	1.82237e-05			157.663	1.54497e-05
157.731	1.84648e-05			157.782	1.5245e-05
157.85	1.83069e-05			157.901	1.53845e-05
157.958	1.84379e-05			158.009	1.55116e-05
158.077	1.83413e-05			158.128	1.54361e-05
158.196	1.8249e-05			158.247	1.54655e-05
158.315	1.82515e-05			158.366	1.54634e-05
158.423	1.8238e-05			158.474	1.53679e-05
158.542	1.82708e-05			158.593	1.53972e-05
158.661	1.82599e-05			158.712	1.54644e-05
158.78	1.83842e-05			158.831	1.5413e-05
158.899	1.82985e-05			158.95	1.54203e-05
159.018	1.82599e-05			159.069	1.55201e-05
159.137	1.8233e-05			159.188	1.53804e-05
159.245	1.82817e-05			159.307	1.55012e-05
159.364	1.81877e-05			159.415	1.54759e-05
159.483	1.8401e-05			159.534	1.54087e-05
159.602	1.83699e-05			159.642	1.5415e-05
159.721	1.82355e-05			159.749	1.5287e-05
159.828	1.82775e-05			159.857	1.54287e-05
159.936	1.83128e-05			159.976	1.54077e-05
160.055	1.82582e-05			160.083	1.54875e-05
160.174	1.82632e-05			160.202	1.54277e-05
160.293	1.82817e-05			160.321	1.54455e-05
160.412	1.83943e-05			160.429	1.53122e-05
160.531	1.82481e-05			160.548	1.54655e-05
160.65	1.84026e-05			160.667	1.53815e-05
160.746	1.83842e-05			160.775	1.55295e-05
160.854	1.82406e-05			160.894	1.54802e-05
160.973	1.82481e-05			161.001	1.54907e-05
161.092	1.83128e-05			161.109	1.55579e-05
161.211	1.83682e-05			161.228	1.54077e-05
161.33	1.82607e-05			161.347	1.53657e-05
161.438	1.82834e-05			161.454	1.56051e-05
161.557	1.84589e-05			161.573	1.55106e-05
161.664	1.83615e-05			161.681	1.55127e-05
161.783	1.83564e-05			161.8	1.52817e-05
161.903	1.8212e-05			161.919	1.55463e-05
162.01	1.82952e-05			162.038	1.5456e-05
162.129	1.85412e-05			162.157	1.54917e-05
162.248	1.83648e-05			162.276	1.53994e-05
162.367	1.84102e-05			162.395	1.54287e-05
162.486	1.83506e-05			162.515	1.54582e-05
162.605	1.84388e-05			162.634	1.5478e-05
162.724	1.83858e-05			162.753	1.54235e-05
162.844	1.82918e-05			162.861	1.52597e-05
162.963	1.83204e-05			162.968	1.54476e-05
163.07	1.83582e-05			163.087	1.53877e-05
163.189	1.82414e-05			163.195	1.54507e-05
163.297	1.81952e-05			163.314	1.53259e-05
163.416	1.84203e-05			163.421	1.52849e-05
163.523	1.83162e-05			163.529	1.54529e-05
163.643	1.85656e-05			163.648	1.52167e-05
163.762	1.83338e-05			163.767	1.53342e-05
163.869	1.83027e-05			163.886	1.54875e-05
163.977	1.84732e-05			163.994	1.54623e-05
164.084	1.82674e-05			164.113	1.53258e-05
164.203	1.83296e-05			164.232	1.56313e-05
164.322	1.84321e-05			164.351	1.53888e-05
164.43	1.83338e-05			164.458	1.53248e-05
164.549	1.82692e-05			164.577	1.54255e-05
164.656	1.83749e-05			164.685	1.54497e-05
164.775	1.83111e-05			164.804	1.53794e-05
164.895	1.82565e-05			164.9	1.5457e-05
165.014	1.82532e-05			165.019	1.54329e-05
165.133	1.83842e-05			165.138	1.54203e-05
165.252	1.83934e-05			165.257	1.52692e-05
165.371	1.84707e-05			165.376	1.54707e-05
165.467	1.83422e-05			165.495	1.54255e-05
165.586	1.83128e-05			165.614	1.5413e-05
165.705	1.81919e-05			165.711	1.54182e-05
165.824	1.83095e-05			165.83	1.53815e-05
165.943	1.82792e-05			165.949	1.53521e-05
166.062	1.83161e-05			166.068	1.55e-05
166.181	1.8254e-05			166.187	1.54329e-05
166.3	1.84715e-05			166.306	1.53594e-05
166.419	1.83094e-05			166.425	1.5266e-05
166.538	1.83455e-05			166.532	1.53689e-05
166.658	1.82775e-05			166.651	1.54749e-05
166.777	1.83825e-05			166.771	1.54161e-05
166.884	1.83464e-05			166.89	1.55526e-05
167.003	1.82422e-05			167.009	1.53752e-05
167.123	1.84808e-05			167.128	1.54109e-05
167.242	1.83582e-05			167.247	1.54707e-05
167.361	1.82288e-05			167.355	1.55127e-05
167.48	1.83674e-05			167.474	1.54245e-05
167.576	1.82918e-05			167.581	1.53962e-05
167.695	1.83556e-05			167.7	1.53878e-05
167.814	1.82431e-05			167.819	1.54214e-05
167.921	1.84018e-05			167.927	1.53836e-05
168.04	1.8448e-05			168.034	1.53364e-05
168.159	1.81935e-05			168.154	1.54948e-05
168.279	1.83179e-05			168.273	1.54004e-05
168.398	1.83321e-05			168.392	1.54644e-05
168.517	1.83934e-05			168.499	1.53762e-05
168.624	1.83136e-05			168.607	1.54949e-05
168.743	1.84295e-05			168.726	1.52597e-05
168.851	1.82145e-05			168.833	1.54675e-05
168.97	1.8291e-05			168.941	1.53835e-05
169.089	1.84203e-05			169.048	1.53815e-05
169.208	1.82431e-05			169.167	1.52733e-05
169.327	1.82692e-05			169.275	1.52292e-05
169.446	1.83716e-05			169.383	1.55e-05
169.565	1.84027e-05			169.49	1.54087e-05
169.684	1.83808e-05			169.609	1.54844e-05
169.792	1.82641e-05			169.717	1.55788e-05
169.911	1.83296e-05			169.824	1.53238e-05
170.03	1.84388e-05			169.932	1.54718e-05
170.137	1.83388e-05			170.051	1.54297e-05
170.256	1.8375e-05			170.159	1.53101e-05
170.375	1.82952e-05			170.278	1.54959e-05
170.495	1.82801e-05			170.385	1.52775e-05
170.614	1.84043e-05			170.493	1.53027e-05
170.733	1.82733e-05			170.612	1.5458e-05
170.852	1.85841e-05			170.731	1.54466e-05
170.971	1.83061e-05			170.838	1.54225e-05
171.09	1.82885e-05			170.946	1.55085e-05
171.197	1.83497e-05			171.054	1.53195e-05
171.317	1.83161e-05			171.173	1.55148e-05
171.436	1.83918e-05			171.28	1.53961e-05
171.543	1.83985e-05			171.399	1.54371e-05
171.662	1.83086e-05			171.507	1.53521e-05
171.77	1.82649e-05			171.614	1.55242e-05
171.889	1.81977e-05			171.722	1.54696e-05
172.008	1.83019e-05			171.829	1.53048e-05
172.127	1.82632e-05			171.948	1.5415e-05
172.235	1.82986e-05			172.067	1.53679e-05
172.354	1.81776e-05			172.186	1.53469e-05
172.473	1.84707e-05			172.306	1.5267e-05
172.58	1.84396e-05			172.425	1.54161e-05
172.699	1.83414e-05			172.544	1.54612e-05
172.819	1.84203e-05			172.663	1.53889e-05
172.938	1.83985e-05			172.77	1.53321e-05
173.045	1.83405e-05			172.878	1.54276e-05
173.164	1.85009e-05			172.997	1.53259e-05
173.283	1.82246e-05			173.105	1.54046e-05
173.402	1.83187e-05			173.212	1.55295e-05
173.521	1.82867e-05			173.32	1.54109e-05
173.641	1.83842e-05			173.439	1.54612e-05
173.76	1.83582e-05			173.558	1.53626e-05
173.867	1.84245e-05			173.677	1.5413e-05
173.975	1.83229e-05			173.796	1.5331e-05
174.094	1.84035e-05			173.904	1.5478e-05
174.213	1.82708e-05			174.023	1.54203e-05
174.332	1.83212e-05			174.13	1.55106e-05
174.451	1.83884e-05			174.249	1.54539e-05
174.57	1.83388e-05			174.357	1.54319e-05
174.678	1.84388e-05			174.476	1.5436e-05
174.785	1.83371e-05			174.595	1.54834e-05
174.893	1.83077e-05			174.702	1.5391e-05
175.012	1.84043e-05			174.821	1.53541e-05
175.131	1.82229e-05			174.941	1.54077e-05
175.238	1.83808e-05			175.06	1.55305e-05
175.357	1.83489e-05			175.167	1.55883e-05
175.476	1.84757e-05			175.286	1.53447e-05
175.595	1.83733e-05			175.405	1.54213e-05
175.715	1.84892e-05			175.524	1.54424e-05
175.822	1.84194e-05			175.643	1.55872e-05
175.93	1.8343e-05			175.763	1.53679e-05
176.049	1.83942e-05			175.882	1.54382e-05
176.168	1.84051e-05			176.001	1.53007e-05
176.287	1.84211e-05			176.12	1.53342e-05
176.394	1.83304e-05			176.227	1.53605e-05
176.513	1.84254e-05			176.335	1.5371e-05
176.632	1.82548e-05			176.454	1.54077e-05
176.74	1.83044e-05			176.561	1.53342e-05
176.859	1.83179e-05			176.681	1.54592e-05
176.955	1.8359e-05			176.8	1.54759e-05
177.063	1.83817e-05			176.919	1.54686e-05
177.182	1.8443e-05			177.015	1.54087e-05
177.301	1.84061e-05			177.134	1.53185e-05
177.42	1.84043e-05			177.253	1.5351e-05
177.539	1.8306e-05			177.372	1.5434e-05
177.658	1.83061e-05			177.491	1.54276e-05
177.777	1.82876e-05			177.587	1.53626e-05
177.896	1.83985e-05			177.706	1.52471e-05
178.015	1.8238e-05			177.825	1.53322e-05
178.134	1.82372e-05			177.944	1.5541e-05
178.242	1.8364e-05			178.063	1.52849e-05
178.361	1.83464e-05			178.171	1.53259e-05
178.469	1.84774e-05			178.279	1.5392e-05
178.588	1.83707e-05			178.398	1.52576e-05
178.707	1.83858e-05			178.517	1.53111e-05
178.826	1.8453e-05			178.636	1.53951e-05
178.945	1.83246e-05			178.743	1.54245e-05
179.052	1.84463e-05			178.851	1.54497e-05
179.171	1.83397e-05			178.958	1.53972e-05
179.268	1.84228e-05			179.077	1.53846e-05
179.375	1.82296e-05			179.196	1.53541e-05
179.494	1.82985e-05			179.315	1.54245e-05
179.613	1.82599e-05			179.435	1.53415e-05
179.721	1.82288e-05			179.554	1.54927e-05
179.84	1.83556e-05			179.661	1.54276e-05
179.959	1.82423e-05			179.78	1.55201e-05
180.078	1.82145e-05			179.888	1.54224e-05
180.197	1.82842e-05			179.995	1.54739e-05
180.304	1.8076e-05			180.114	1.52839e-05
180.412	1.84497e-05			180.222	1.52345e-05
180.531	1.82867e-05			180.341	1.52828e-05
180.65	1.84673e-05			180.46	1.53059e-05
180.769	1.83288e-05			180.579	1.52912e-05
180.888	1.83439e-05			180.687	1.55043e-05
180.996	1.83514e-05			180.806	1.53752e-05
181.115	1.82011e-05			180.925	1.52785e-05
181.234	1.83775e-05			181.044	1.54644e-05
181.353	1.8275e-05			181.151	1.53563e-05
181.472	1.83775e-05			181.259	1.52167e-05
181.591	1.82825e-05			181.367	1.55442e-05
181.71	1.84673e-05			181.486	1.54088e-05
181.806	1.84522e-05			181.593	1.53573e-05
181.925	1.83876e-05			181.712	1.54224e-05
182.033	1.82943e-05			181.82	1.54024e-05
182.152	1.84421e-05			181.939	1.55242e-05
182.271	1.83707e-05			182.058	1.54129e-05
182.39	1.8343e-05			182.166	1.56229e-05
182.509	1.82952e-05			182.285	1.5457e-05
182.628	1.83212e-05			182.404	1.54004e-05
182.724	1.84564e-05			182.523	1.53951e-05
182.843	1.81927e-05			182.642	1.53531e-05
182.963	1.83212e-05			182.761	1.54329e-05
183.07	1.84413e-05			182.88	1.53143e-05
183.189	1.82691e-05			182.999	1.53553e-05
183.297	1.83767e-05			183.118	1.53395e-05
183.416	1.84514e-05			183.226	1.53636e-05
183.535	1.84009e-05			183.345	1.533e-05
183.642	1.83153e-05			183.464	1.54707e-05
183.761	1.83808e-05			183.583	1.55505e-05
183.881	1.82095e-05			183.702	1.53563e-05
184	1.828e-05			183.81	1.53604e-05
184.119	1.84094e-05			183.929	1.53878e-05
184.238	1.83111e-05			184.036	1.52649e-05
184.357	1.84245e-05			184.155	1.54613e-05
184.476	1.82742e-05			184.274	1.54802e-05
184.595	1.83842e-05			184.382	1.52996e-05
184.714	1.8301e-05			184.501	1.54256e-05
184.833	1.82885e-05			184.608	1.54046e-05
184.952	1.8254e-05			184.716	1.53384e-05
185.071	1.82859e-05			184.835	1.54129e-05
185.19	1.81809e-05			184.954	1.54718e-05
185.298	1.81952e-05			185.073	1.54487e-05
185.417	1.83179e-05			185.192	1.54539e-05
185.536	1.83388e-05			185.3	1.52303e-05
185.655	1.84446e-05			185.419	1.54004e-05
185.762	1.84321e-05			185.538	1.53154e-05
185.882	1.84212e-05			185.646	1.52597e-05
186.001	1.81675e-05			185.753	1.55285e-05
186.12	1.84052e-05			185.872	1.53762e-05
186.216	1.83346e-05			185.991	1.5393e-05
186.312	1.83153e-05			186.099	1.53007e-05
186.419	1.82935e-05			186.218	1.55137e-05
186.527	1.83657e-05			186.337	1.5223e-05
186.646	1.84102e-05			186.445	1.5497e-05
186.742	1.82909e-05			186.564	1.53941e-05
186.838	1.83212e-05			186.671	1.5456e-05
186.957	1.84186e-05			186.79	1.53615e-05
187.065	1.8396e-05			186.909	1.53226e-05
187.184	1.84035e-05			187.029	1.54434e-05
187.303	1.83867e-05			187.148	1.54392e-05
187.41	1.83279e-05			187.244	1.5329e-05
187.529	1.84001e-05			187.363	1.54403e-05
187.649	1.83791e-05			187.482	1.53469e-05
187.768	1.83262e-05			187.589	1.54266e-05
187.887	1.83808e-05			187.708	1.53227e-05
188.006	1.85186e-05			187.827	1.52376e-05
188.125	1.82187e-05			187.935	1.53364e-05
188.244	1.83363e-05			188.031	1.5393e-05
188.363	1.83439e-05			188.15	1.5414e-05
188.482	1.83422e-05			188.269	1.54854e-05
188.601	1.82834e-05			188.377	1.53227e-05
188.708	1.82641e-05			188.484	1.5414e-05
188.816	1.838e-05			188.603	1.53657e-05
188.912	1.82683e-05			188.722	1.5456e-05
189.031	1.82909e-05			188.841	1.54487e-05
189.15	1.82523e-05			188.949	1.53625e-05
189.269	1.82859e-05			189.068	1.53752e-05
189.377	1.82608e-05			189.176	1.52901e-05
189.496	1.81927e-05			189.295	1.53415e-05
189.615	1.83296e-05			189.414	1.55117e-05
189.723	1.82616e-05			189.533	1.53458e-05
189.83	1.84707e-05			189.641	1.5161e-05
189.949	1.83489e-05			189.76	1.53835e-05
190.057	1.83044e-05			189.879	1.54004e-05
190.176	1.83371e-05			189.998	1.53983e-05
190.295	1.83036e-05			190.117	1.55211e-05
190.403	1.82968e-05			190.213	1.55589e-05
190.522	1.82154e-05			190.332	1.5415e-05
190.641	1.83825e-05			190.44	1.53845e-05
190.76	1.82372e-05			190.559	1.5309e-05
190.879	1.82934e-05			190.666	1.53437e-05
190.998	1.83976e-05			190.774	1.52692e-05
191.106	1.84421e-05			190.881	1.5499e-05
191.225	1.82943e-05			191	1.54854e-05
191.344	1.83447e-05			191.085	1.54949e-05
191.451	1.83489e-05			191.192	1.52922e-05
191.57	1.83145e-05			191.3	1.52912e-05
191.678	1.83355e-05			191.419	1.5266e-05
191.797	1.84396e-05			191.538	1.51232e-05
191.916	1.83489e-05			191.657	1.5351e-05
192.035	1.83237e-05			191.776	1.533e-05
192.131	1.82885e-05			191.895	1.53458e-05
192.25	1.82078e-05			192.014	1.53679e-05
192.369	1.83296e-05			192.122	1.54203e-05
192.488	1.8291e-05			192.241	1.54738e-05
192.607	1.8259e-05			192.36	1.54046e-05
192.726	1.82481e-05			192.479	1.53248e-05
192.845	1.83279e-05			192.587	1.53427e-05
192.964	1.82364e-05			192.706	1.5478e-05
193.083	1.82809e-05			192.813	1.53395e-05
193.191	1.82507e-05			192.932	1.52639e-05
193.298	1.83153e-05			193.051	1.54046e-05
193.418	1.82826e-05			193.171	1.53279e-05
193.525	1.83867e-05			193.29	1.54665e-05
193.633	1.82229e-05			193.409	1.52954e-05
193.74	1.84035e-05			193.516	1.54046e-05
193.859	1.82599e-05			193.635	1.55043e-05
193.967	1.83439e-05			193.754	1.53132e-05
194.086	1.83943e-05			193.873	1.54424e-05
194.205	1.83716e-05			193.992	1.55252e-05
194.313	1.83884e-05			194.112	1.5371e-05
194.432	1.83447e-05			194.231	1.52817e-05
194.551	1.83682e-05			194.35	1.54696e-05
194.658	1.83859e-05			194.446	1.54655e-05
194.778	1.8453e-05			194.553	1.53415e-05
194.874	1.82817e-05			194.672	1.53479e-05
194.993	1.84194e-05			194.78	1.53699e-05
195.089	1.83153e-05			194.899	1.52692e-05
195.196	1.82423e-05			195.018	1.55525e-05
195.315	1.83808e-05			195.137	1.52859e-05
195.434	1.83137e-05			195.256	1.54255e-05
195.553	1.82422e-05			195.375	1.53037e-05
195.661	1.83682e-05			195.494	1.53994e-05
195.78	1.82255e-05			195.613	1.54099e-05
195.899	1.84497e-05			195.721	1.54045e-05
195.995	1.82171e-05			195.84	1.52934e-05
196.114	1.83926e-05			195.947	1.52828e-05
196.233	1.839e-05			196.066	1.54791e-05
196.341	1.83481e-05			196.185	1.54844e-05
196.46	1.82859e-05			196.305	1.53783e-05
196.567	1.83363e-05			196.424	1.53972e-05
196.686	1.83421e-05			196.531	1.54224e-05
196.805	1.83229e-05			196.627	1.53364e-05
196.924	1.8301e-05			196.735	1.53069e-05
197.043	1.82272e-05			196.854	1.54791e-05
197.163	1.83808e-05			196.973	1.52922e-05
197.282	1.81843e-05			197.092	1.5393e-05
197.401	1.83178e-05			197.2	1.54162e-05
197.52	1.83506e-05			197.319	1.53657e-05
197.639	1.83094e-05			197.426	1.54854e-05
197.758	1.84337e-05			197.534	1.5476e-05
197.877	1.8317e-05			197.653	1.54225e-05
197.996	1.81927e-05			197.761	1.53447e-05
198.104	1.82658e-05			197.88	1.54224e-05
198.223	1.83061e-05			197.999	1.53237e-05
198.342	1.82355e-05			198.118	1.54801e-05
198.461	1.83985e-05			198.225	1.531e-05
198.569	1.84363e-05			198.333	1.53132e-05
198.688	1.84085e-05			198.429	1.52408e-05
198.807	1.84295e-05			198.548	1.54487e-05
198.926	1.83145e-05			198.667	1.54791e-05
199.045	1.8333e-05			198.786	1.53447e-05
199.164	1.83405e-05			198.905	1.53132e-05
199.283	1.83111e-05			199.024	1.54844e-05
199.391	1.8275e-05			199.132	1.54864e-05
199.51	1.83624e-05			199.251	1.53699e-05
199.629	1.82515e-05			199.37	1.54864e-05
199.748	1.83094e-05			199.489	1.55211e-05
199.855	1.82271e-05			199.585	1.54612e-05
199.974	1.84446e-05			199.704	1.55201e-05
200.082	1.84522e-05			199.811	1.55001e-05
200.201	1.82439e-05			199.931	1.52902e-05
200.32	1.82767e-05			200.05	1.55189e-05
200.439	1.83002e-05			200.169	1.54414e-05
200.558	1.83691e-05			200.288	1.53689e-05
200.677	1.83288e-05			200.407	1.52502e-05
200.796	1.82313e-05			200.526	1.54675e-05
200.904	1.83346e-05			200.634	1.53279e-05
201.023	1.83867e-05			200.741	1.5392e-05
201.142	1.8396e-05			200.86	1.52692e-05
201.261	1.84581e-05			200.979	1.52555e-05
201.369	1.84472e-05			201.098	1.54665e-05
201.488	1.82994e-05			201.217	1.5372e-05
201.595	1.839e-05			201.325	1.52555e-05
201.703	1.83876e-05			201.433	1.54822e-05
201.822	1.83313e-05			201.552	1.54969e-05
201.941	1.82338e-05			201.659	1.54361e-05
202.06	1.84681e-05			201.767	1.55516e-05
202.167	1.83514e-05			201.886	1.54759e-05
202.275	1.83153e-05			202.005	1.54067e-05
202.394	1.85059e-05			202.124	1.53437e-05
202.513	1.84598e-05			202.243	1.54129e-05
202.621	1.82557e-05			202.351	1.5434e-05
202.728	1.83767e-05			202.458	1.53574e-05
202.847	1.82943e-05			202.577	1.53457e-05
202.966	1.82901e-05			202.696	1.53689e-05
203.085	1.8354e-05			202.815	1.52734e-05
203.193	1.83413e-05			202.934	1.53762e-05
203.312	1.8359e-05			203.042	1.5436e-05
203.42	1.83808e-05			203.149	1.53857e-05
203.539	1.83791e-05			203.268	1.53994e-05
203.658	1.83338e-05			203.388	1.53352e-05
203.777	1.82876e-05			203.507	1.54077e-05
203.896	1.83497e-05			203.626	1.55149e-05
204.015	1.83497e-05			203.745	1.53489e-05
204.134	1.828e-05			203.841	1.52723e-05
204.253	1.83212e-05			203.96	1.53574e-05
204.361	1.84942e-05			204.067	1.54287e-05
204.468	1.82658e-05			204.186	1.5287e-05
204.587	1.83354e-05			204.283	1.51946e-05
204.706	1.82608e-05			204.402	1.53962e-05
204.826	1.83582e-05			204.521	1.55254e-05
204.945	1.83338e-05			204.64	1.5539e-05
205.064	1.81885e-05			204.759	1.52922e-05
205.171	1.82154e-05			204.878	1.5539e-05
205.279	1.82221e-05			204.997	1.56492e-05
205.398	1.8202e-05			205.105	1.53541e-05
205.517	1.82313e-05			205.224	1.55085e-05
205.636	1.8443e-05			205.343	1.53857e-05
205.755	1.81986e-05			205.462	1.55715e-05
205.874	1.8327e-05			205.581	1.54099e-05
205.982	1.83757e-05			205.7	1.55232e-05
206.101	1.83808e-05			205.808	1.5223e-05
206.22	1.85177e-05			205.927	1.5308e-05
206.327	1.838e-05			206.034	1.55536e-05
206.446	1.83414e-05			206.153	1.55494e-05
206.565	1.82624e-05			206.261	1.52922e-05
206.684	1.82885e-05			206.38	1.53195e-05
206.804	1.83119e-05			206.499	1.54444e-05
206.911	1.83388e-05			206.618	1.55054e-05
207.019	1.84001e-05			206.714	1.53143e-05
207.126	1.83271e-05			206.833	1.53668e-05
207.245	1.82053e-05			206.952	1.54466e-05
207.364	1.83548e-05			207.071	1.5435e-05
207.483	1.83792e-05			207.179	1.52712e-05
207.591	1.84228e-05			207.298	1.5393e-05
207.71	1.82918e-05			207.394	1.53259e-05
207.818	1.83019e-05			207.513	1.52366e-05
207.937	1.82809e-05			207.632	1.54834e-05
208.044	1.84984e-05			207.751	1.53825e-05
208.163	1.81826e-05			207.87	1.54414e-05
208.282	1.82809e-05			207.989	1.53878e-05
208.401	1.82481e-05			208.108	1.54414e-05
208.509	1.83455e-05			208.216	1.53059e-05
208.617	1.81776e-05			208.335	1.54403e-05
208.736	1.83245e-05			208.454	1.53195e-05
208.855	1.8359e-05			208.538	1.55684e-05
208.962	1.84488e-05			208.658	1.53845e-05
209.07	1.83565e-05			208.777	1.55116e-05
209.177	1.82809e-05			208.896	1.53972e-05
209.285	1.82607e-05			209.015	1.54203e-05
209.392	1.83724e-05			209.134	1.53888e-05
209.511	1.84069e-05			209.242	1.533e-05
209.631	1.84127e-05			209.361	1.53447e-05
209.75	1.82994e-05			209.48	1.53563e-05
209.869	1.82557e-05			209.599	1.53867e-05
209.988	1.84069e-05			209.706	1.54014e-05
210.095	1.83665e-05			209.825	1.552e-05
210.214	1.83288e-05			209.944	1.5246e-05
210.333	1.84639e-05			210.064	1.52932e-05
210.441	1.83632e-05			210.183	1.53647e-05
210.56	1.83279e-05			210.29	1.54529e-05
210.667	1.8396e-05			210.409	1.56387e-05
210.787	1.82489e-05			210.517	1.54834e-05
210.894	1.83346e-05			210.624	1.53773e-05
211.013	1.83598e-05			210.743	1.53815e-05
211.132	1.83405e-05			210.862	1.54224e-05
211.251	1.8432e-05			210.982	1.54822e-05
211.37	1.84464e-05			211.101	1.54077e-05
211.489	1.83119e-05			211.208	1.55526e-05
211.608	1.84069e-05			211.327	1.54203e-05
211.728	1.82355e-05			211.446	1.54371e-05
211.847	1.82271e-05			211.565	1.54255e-05
211.954	1.83514e-05			211.673	1.53563e-05
212.073	1.84068e-05			211.792	1.53395e-05
212.192	1.84262e-05			211.911	1.52524e-05
212.3	1.83481e-05			212.018	1.51988e-05
212.419	1.82859e-05			212.138	1.53678e-05
212.538	1.82733e-05			212.245	1.5414e-05
212.657	1.83825e-05			212.353	1.52818e-05
212.753	1.82481e-05			212.472	1.54025e-05
212.861	1.83632e-05			212.591	1.54077e-05
212.968	1.82154e-05			212.698	1.53877e-05
213.087	1.84228e-05			212.817	1.5583e-05
213.206	1.83833e-05			212.936	1.53468e-05
213.326	1.82406e-05			213.056	1.53794e-05
213.445	1.83439e-05			213.175	1.54381e-05
213.552	1.83749e-05			213.282	1.53805e-05
213.671	1.82968e-05			213.401	1.52922e-05
213.79	1.83279e-05			213.52	1.53059e-05
213.909	1.82104e-05			213.628	1.53899e-05
214.017	1.82683e-05			213.736	1.54319e-05
214.113	1.82616e-05			213.832	1.53709e-05
214.232	1.82843e-05			213.951	1.55159e-05
214.351	1.84035e-05			214.047	1.54392e-05
214.47	1.82624e-05			214.166	1.55001e-05
214.578	1.83397e-05			214.273	1.56408e-05
214.685	1.82255e-05			214.392	1.54497e-05
214.804	1.85144e-05			214.512	1.55053e-05
214.9	1.83439e-05			214.631	1.56103e-05
215.008	1.83396e-05			214.75	1.56114e-05
215.127	1.8327e-05			214.869	1.55085e-05
215.246	1.81591e-05			214.988	1.55032e-05
215.365	1.82599e-05			215.095	1.53626e-05
215.484	1.82968e-05			215.214	1.55222e-05
215.603	1.84111e-05			215.333	1.54927e-05
215.722	1.84026e-05			215.441	1.53584e-05
215.841	1.84455e-05			215.56	1.554e-05
215.96	1.82926e-05			215.679	1.54414e-05
216.079	1.83137e-05			215.798	1.5457e-05
216.198	1.8333e-05			215.906	1.53437e-05
216.317	1.83539e-05			216.025	1.53657e-05
216.437	1.83363e-05			216.144	1.54455e-05
216.544	1.82952e-05			216.263	1.54077e-05
216.652	1.83489e-05			216.382	1.5351e-05
216.771	1.83582e-05			216.501	1.55075e-05
216.89	1.83397e-05			216.62	1.52649e-05
216.998	1.81692e-05			216.739	1.53531e-05
217.105	1.8238e-05			216.858	1.54697e-05
217.224	1.83665e-05			216.977	1.55673e-05
217.343	1.83884e-05			217.096	1.54424e-05
217.439	1.82573e-05			217.215	1.54424e-05
217.558	1.82767e-05			217.334	1.54602e-05
217.677	1.82573e-05			217.454	1.55242e-05
217.796	1.81986e-05			217.573	1.54592e-05
217.916	1.83783e-05			217.692	1.53772e-05
218.035	1.83615e-05			217.811	1.54329e-05
218.154	1.82952e-05			217.918	1.55767e-05
218.273	1.82347e-05			218.026	1.54864e-05
218.392	1.82801e-05			218.145	1.5413e-05
218.511	1.83128e-05			218.252	1.55672e-05
218.63	1.83111e-05			218.36	1.53657e-05
218.738	1.82885e-05			218.479	1.54487e-05
218.857	1.82582e-05			218.587	1.54235e-05
218.976	1.83968e-05			218.694	1.55064e-05
219.095	1.84144e-05			218.813	1.53825e-05
219.214	1.82884e-05			218.932	1.54434e-05
219.333	1.83019e-05			219.052	1.54529e-05
219.452	1.83548e-05			219.159	1.55106e-05
219.571	1.82867e-05			219.278	1.52712e-05
219.678	1.83287e-05			219.386	1.55105e-05
219.798	1.82742e-05			219.493	1.55558e-05
219.917	1.8338e-05			219.612	1.54907e-05
220.024	1.8322e-05			219.731	1.53657e-05
220.143	1.83573e-05			219.851	1.55641e-05
220.262	1.83447e-05			219.97	1.53815e-05
220.381	1.82926e-05			220.089	1.5582e-05
220.5	1.82725e-05			220.208	1.55609e-05
220.608	1.83993e-05			220.327	1.5414e-05
220.715	1.83808e-05			220.434	1.55033e-05
220.823	1.83304e-05			220.553	1.54613e-05
220.93	1.82498e-05			220.672	1.55201e-05
221.05	1.84522e-05			220.78	1.5413e-05
221.169	1.83338e-05			220.887	1.53447e-05
221.276	1.83304e-05			220.995	1.53993e-05
221.384	1.82078e-05			221.114	1.55347e-05
221.491	1.81826e-05			221.233	1.54539e-05
221.611	1.82632e-05			221.352	1.55442e-05
221.718	1.83456e-05			221.471	1.55274e-05
221.837	1.81515e-05			221.59	1.55924e-05
221.945	1.83128e-05			221.709	1.53752e-05
222.064	1.82422e-05			221.828	1.54224e-05
222.183	1.84388e-05			221.936	1.54424e-05
222.29	1.828e-05			222.043	1.5434e-05
222.398	1.83481e-05			222.163	1.54539e-05
222.517	1.82221e-05			222.282	1.54665e-05
222.636	1.82036e-05			222.401	1.55599e-05
222.755	1.82926e-05			222.52	1.56366e-05
222.874	1.82826e-05			222.639	1.55179e-05
222.993	1.83119e-05			222.758	1.55799e-05
223.112	1.82574e-05			222.877	1.55075e-05
223.231	1.83715e-05			222.996	1.56954e-05
223.339	1.82322e-05			223.104	1.55347e-05
223.458	1.8443e-05			223.2	1.53878e-05
223.554	1.82541e-05			223.296	1.54444e-05
223.662	1.82255e-05			223.415	1.53637e-05
223.781	1.8317e-05			223.534	1.535e-05
223.9	1.82489e-05			223.653	1.53877e-05
224.019	1.84387e-05			223.772	1.54182e-05
224.126	1.83976e-05			223.88	1.53573e-05
224.234	1.82322e-05			223.999	1.56009e-05
224.353	1.82565e-05			224.118	1.55211e-05
224.472	1.83128e-05			224.225	1.55463e-05
224.591	1.82632e-05			224.333	1.55337e-05
224.71	1.82893e-05			224.452	1.56922e-05
224.829	1.83867e-05			224.571	1.55264e-05
224.948	1.83195e-05			224.69	1.5457e-05
225.067	1.83422e-05			224.798	1.556e-05
225.186	1.83052e-05			224.905	1.55075e-05
225.305	1.83136e-05			225.024	1.55925e-05
225.424	1.83808e-05			225.143	1.54949e-05
225.532	1.83229e-05			225.262	1.55379e-05
225.628	1.83632e-05			225.37	1.54245e-05
225.747	1.83161e-05			225.489	1.54381e-05
225.866	1.82918e-05			225.585	1.54885e-05
225.985	1.82128e-05			225.692	1.52324e-05
226.104	1.82002e-05			225.8	1.54728e-05
226.224	1.83036e-05			225.908	1.54182e-05
226.343	1.8264e-05			226.027	1.5541e-05
226.462	1.83179e-05			226.146	1.55012e-05
226.581	1.83716e-05			226.265	1.55736e-05
226.7	1.83246e-05			226.384	1.54896e-05
226.807	1.84413e-05			226.503	1.53941e-05
226.915	1.82288e-05			226.622	1.54602e-05
227.034	1.83817e-05			226.741	1.5392e-05
227.153	1.81188e-05			226.849	1.54235e-05
227.272	1.84136e-05			226.968	1.54864e-05
227.391	1.82137e-05			227.087	1.5562e-05
227.499	1.81641e-05			227.206	1.51789e-05
227.618	1.8338e-05			227.325	1.54287e-05
227.725	1.81029e-05			227.444	1.54854e-05
227.833	1.81851e-05			227.563	1.54119e-05
227.952	1.8212e-05			227.671	1.53689e-05
228.06	1.81818e-05			227.778	1.53773e-05
228.179	1.83431e-05			227.897	1.55337e-05
228.298	1.81876e-05			228.016	1.52934e-05
228.417	1.828e-05			228.135	1.5583e-05
228.536	1.83607e-05			228.254	1.54424e-05
228.655	1.8212e-05			228.362	1.54434e-05
228.774	1.82095e-05			228.481	1.5457e-05
228.893	1.83531e-05			228.6	1.54424e-05
229.012	1.82599e-05			228.719	1.54245e-05
229.12	1.83153e-05			228.838	1.53794e-05
229.239	1.81641e-05			228.957	1.53972e-05
229.346	1.82255e-05			229.065	1.55652e-05
229.454	1.82246e-05			229.172	1.53573e-05
229.573	1.80693e-05			229.292	1.54906e-05
229.68	1.81877e-05			229.411	1.54875e-05
229.799	1.83346e-05			229.518	1.53899e-05
229.895	1.82952e-05			229.637	1.54623e-05
230.015	1.81927e-05			229.756	1.5603e-05
230.134	1.82195e-05			229.864	1.54645e-05
230.241	1.82918e-05			229.971	1.55642e-05
230.36	1.83103e-05			230.09	1.53552e-05
230.479	1.83002e-05			230.209	1.53657e-05
230.599	1.82372e-05			230.328	1.54014e-05
230.718	1.83027e-05			230.447	1.54077e-05
230.837	1.82691e-05			230.566	1.53657e-05
230.956	1.81415e-05			230.674	1.54718e-05
231.075	1.8296e-05			230.77	1.54844e-05
231.194	1.81709e-05			230.878	1.54255e-05
231.313	1.82834e-05			230.997	1.53447e-05
231.432	1.8322e-05			231.116	1.55705e-05
231.551	1.83077e-05			231.224	1.54413e-05
231.67	1.83044e-05			231.331	1.54424e-05
231.789	1.8212e-05			231.427	1.55389e-05
231.908	1.83195e-05			231.546	1.5582e-05
232.027	1.83783e-05			231.665	1.53983e-05
232.146	1.83069e-05			231.784	1.5392e-05
232.266	1.82557e-05			231.903	1.54309e-05
232.373	1.82548e-05			232.011	1.55369e-05
232.481	1.82137e-05			232.119	1.52408e-05
232.6	1.83707e-05			232.238	1.55064e-05
232.696	1.83918e-05			232.345	1.53447e-05
232.803	1.82632e-05			232.464	1.55137e-05
232.922	1.8317e-05			232.572	1.55662e-05
233.041	1.81608e-05			232.679	1.54403e-05
233.161	1.81969e-05			232.798	1.52755e-05
233.28	1.83069e-05			232.917	1.53238e-05
233.387	1.81793e-05			233.025	1.55494e-05
233.506	1.82296e-05			233.144	1.54277e-05
233.625	1.82456e-05			233.251	1.56419e-05
233.744	1.83145e-05			233.359	1.55001e-05
233.84	1.82456e-05			233.478	1.54024e-05
233.948	1.82045e-05			233.586	1.54959e-05
234.055	1.83061e-05			233.693	1.53584e-05
234.163	1.827e-05			233.801	1.55924e-05
234.282	1.82296e-05			233.92	1.5497e-05
234.401	1.83069e-05			234.039	1.54549e-05
234.509	1.82859e-05			234.158	1.5414e-05
234.628	1.83506e-05			234.277	1.55579e-05
234.735	1.83061e-05			234.396	1.53342e-05
234.843	1.83002e-05			234.515	1.55022e-05
234.962	1.82137e-05			234.634	1.53794e-05
235.081	1.83758e-05			234.742	1.53752e-05
235.189	1.82414e-05			234.85	1.54004e-05
235.296	1.81969e-05			234.969	1.54424e-05
235.415	1.82044e-05			235.088	1.55179e-05
235.534	1.83019e-05			235.207	1.53594e-05
235.653	1.83867e-05			235.314	1.55851e-05
235.772	1.83069e-05			235.422	1.53899e-05
235.88	1.8322e-05			235.541	1.54319e-05
235.999	1.83128e-05			235.66	1.54822e-05
236.118	1.82271e-05			235.768	1.53542e-05
236.237	1.83069e-05			235.887	1.52818e-05
236.356	1.83019e-05			236.006	1.53962e-05
236.475	1.82288e-05			236.125	1.5542e-05
236.594	1.83657e-05			236.244	1.55022e-05
236.713	1.83346e-05			236.363	1.54791e-05
236.833	1.83296e-05			236.482	1.5371e-05
236.952	1.83489e-05			236.59	1.53573e-05
237.071	1.83413e-05			236.709	1.54507e-05
237.19	1.82398e-05			236.828	1.5478e-05
237.297	1.82624e-05			236.947	1.55516e-05
237.416	1.8296e-05			237.066	1.54517e-05
237.535	1.82952e-05			237.185	1.54265e-05
237.654	1.84749e-05			237.304	1.54875e-05
237.774	1.83556e-05			237.423	1.53647e-05
237.869	1.83355e-05			237.542	1.5392e-05
237.977	1.81994e-05			237.661	1.53835e-05
238.096	1.82691e-05			237.78	1.54172e-05
238.215	1.82934e-05			237.899	1.54613e-05
238.334	1.8301e-05			238.007	1.55641e-05
238.442	1.81792e-05			238.126	1.53752e-05
238.561	1.82599e-05			238.245	1.54834e-05
238.68	1.84144e-05			238.364	1.55127e-05
238.787	1.82968e-05			238.483	1.54014e-05
238.895	1.84178e-05			238.602	1.54287e-05
239.014	1.82422e-05			238.721	1.54749e-05
239.133	1.80306e-05			238.84	1.53846e-05
239.241	1.83036e-05			238.959	1.53122e-05
239.36	1.81768e-05			239.055	1.53836e-05
239.479	1.81599e-05			239.174	1.55096e-05
239.598	1.82632e-05			239.282	1.5457e-05
239.706	1.83313e-05			239.401	1.5435e-05
239.825	1.82876e-05			239.497	1.53279e-05
239.944	1.82154e-05			239.593	1.54424e-05
240.063	1.82926e-05			239.712	1.55547e-05
240.182	1.82305e-05			239.82	1.56051e-05
240.301	1.83103e-05			239.939	1.55e-05
240.42	1.82448e-05			240.047	1.53877e-05
240.528	1.81809e-05			240.166	1.5497e-05
240.624	1.82926e-05			240.285	1.535e-05
240.743	1.82422e-05			240.404	1.54087e-05
240.85	1.83388e-05			240.5	1.52932e-05
240.969	1.82944e-05			240.619	1.55536e-05
241.088	1.83783e-05			240.738	1.54413e-05
241.207	1.8254e-05			240.857	1.55851e-05
241.326	1.83506e-05			240.976	1.55704e-05
241.446	1.83531e-05			241.095	1.52335e-05
241.565	1.83792e-05			241.203	1.53689e-05
241.684	1.82439e-05			241.322	1.53301e-05
241.803	1.82876e-05			241.429	1.53994e-05
241.922	1.81213e-05			241.548	1.53973e-05
242.041	1.82313e-05			241.667	1.54907e-05
242.16	1.83053e-05			241.775	1.54182e-05
242.279	1.82868e-05			241.894	1.53238e-05
242.398	1.83615e-05			242.013	1.54224e-05
242.506	1.82708e-05			242.121	1.54287e-05
242.625	1.83187e-05			242.24	1.53573e-05
242.732	1.82305e-05			242.359	1.54371e-05
242.851	1.82742e-05			242.466	1.5309e-05
242.97	1.83312e-05			242.585	1.55725e-05
243.089	1.83077e-05			242.693	1.53584e-05
243.208	1.83094e-05			242.812	1.54675e-05
243.327	1.82825e-05			242.931	1.53457e-05
243.447	1.80214e-05			243.05	1.53342e-05
243.554	1.82801e-05			243.169	1.54203e-05
243.673	1.82465e-05			243.288	1.54371e-05
243.792	1.82179e-05			243.407	1.55127e-05
243.911	1.82112e-05			243.526	1.54182e-05
244.03	1.83606e-05			243.646	1.53689e-05
244.138	1.82733e-05			243.753	1.53395e-05
244.257	1.81885e-05			243.872	1.55317e-05
244.376	1.82129e-05			243.98	1.54529e-05
244.495	1.83489e-05			244.087	1.5266e-05
244.591	1.83187e-05			244.195	1.55201e-05
244.71	1.81961e-05			244.314	1.5393e-05
244.806	1.82229e-05			244.433	1.54046e-05
244.914	1.83993e-05			244.541	1.54466e-05
245.033	1.82859e-05			244.648	1.5391e-05
245.152	1.83086e-05			244.767	1.54319e-05
245.271	1.81599e-05			244.875	1.54329e-05
245.39	1.83959e-05			244.994	1.5436e-05
245.498	1.83968e-05			245.113	1.5583e-05
245.617	1.81616e-05			245.22	1.5436e-05
245.736	1.83212e-05			245.339	1.55347e-05
245.855	1.81994e-05			245.458	1.54056e-05
245.974	1.83808e-05			245.578	1.55106e-05
246.082	1.83598e-05			245.697	1.54476e-05
246.201	1.81994e-05			245.816	1.54414e-05
246.308	1.83338e-05			245.923	1.54644e-05
246.427	1.83237e-05			246.031	1.54035e-05
246.546	1.83044e-05			246.127	1.54077e-05
246.665	1.82456e-05			246.223	1.54371e-05
246.773	1.81213e-05			246.342	1.54193e-05
246.881	1.828e-05			246.461	1.54371e-05
247	1.83455e-05			246.58	1.53479e-05
247.119	1.82515e-05			246.699	1.54959e-05
247.226	1.82523e-05			246.807	1.54759e-05
247.345	1.82271e-05			246.915	1.55116e-05
247.464	1.81734e-05			247.022	1.5308e-05
247.583	1.82036e-05			247.141	1.55778e-05
247.702	1.84009e-05			247.26	1.52397e-05
247.821	1.82775e-05			247.379	1.55064e-05
247.94	1.83195e-05			247.498	1.53689e-05
248.06	1.81667e-05			247.617	1.53289e-05
248.179	1.81919e-05			247.725	1.54444e-05
248.298	1.82817e-05			247.844	1.53479e-05
248.405	1.83061e-05			247.963	1.55705e-05
248.513	1.81835e-05			248.082	1.53269e-05
248.632	1.83623e-05			248.201	1.54067e-05
248.751	1.82448e-05			248.321	1.54476e-05
248.87	1.82775e-05			248.44	1.53961e-05
248.989	1.83187e-05			248.559	1.53679e-05
249.108	1.8364e-05			248.666	1.55252e-05
249.216	1.82775e-05			248.774	1.54046e-05
249.323	1.82783e-05			248.893	1.53489e-05
249.442	1.83179e-05			249.012	1.5519e-05
249.55	1.82398e-05			249.131	1.54277e-05
249.669	1.83397e-05			249.25	1.55558e-05
249.788	1.81641e-05			249.357	1.56072e-05
249.896	1.83463e-05			249.476	1.53657e-05
250.015	1.82641e-05			249.596	1.5349e-05
250.134	1.8291e-05			249.715	1.55368e-05
250.253	1.83287e-05			249.834	1.55085e-05
250.372	1.82624e-05			249.941	1.54602e-05
250.491	1.82632e-05			250.049	1.54907e-05
250.61	1.81323e-05			250.168	1.53625e-05
250.706	1.82658e-05			250.287	1.5436e-05
250.825	1.82893e-05			250.406	1.54739e-05
250.933	1.82372e-05			250.525	1.53993e-05
251.052	1.82086e-05			250.644	1.54844e-05
251.159	1.82624e-05			250.763	1.54927e-05
251.278	1.81868e-05			250.871	1.55148e-05
251.398	1.82422e-05			250.978	1.5582e-05
251.505	1.82708e-05			251.097	1.54665e-05
251.624	1.82095e-05			251.216	1.5624e-05
251.743	1.8322e-05			251.336	1.56082e-05
251.862	1.8322e-05			251.455	1.54099e-05
251.981	1.83506e-05			251.574	1.55254e-05
252.1	1.82775e-05			251.681	1.53027e-05
252.208	1.82162e-05			251.8	1.55989e-05
252.327	1.82137e-05			251.919	1.55505e-05
252.446	1.82406e-05			252.038	1.5583e-05
252.565	1.83288e-05			252.158	1.5436e-05
252.661	1.8396e-05			252.265	1.53867e-05
252.78	1.82868e-05			252.384	1.55043e-05
252.888	1.8301e-05			252.492	1.54045e-05
252.984	1.82876e-05			252.611	1.5307e-05
253.091	1.827e-05			252.718	1.54255e-05
253.21	1.82061e-05			252.837	1.53552e-05
253.33	1.8212e-05			252.957	1.5415e-05
253.449	1.8338e-05			253.076	1.54834e-05
253.568	1.83044e-05			253.183	1.54812e-05
253.687	1.83036e-05			253.302	1.5373e-05
253.806	1.83892e-05			253.41	1.56397e-05
253.925	1.81911e-05			253.529	1.5541e-05
254.044	1.82356e-05			253.648	1.53269e-05
254.163	1.84043e-05			253.767	1.55211e-05
254.271	1.82691e-05			253.886	1.53594e-05
254.39	1.82339e-05			254.005	1.54162e-05
254.509	1.83145e-05			254.124	1.53846e-05
254.605	1.81877e-05			254.243	1.54728e-05
254.724	1.82431e-05			254.362	1.52555e-05
254.831	1.82674e-05			254.47	1.55106e-05
254.951	1.81196e-05			254.589	1.53668e-05
255.07	1.8265e-05			254.708	1.53825e-05
255.189	1.83237e-05			254.816	1.55379e-05
255.308	1.81381e-05			254.935	1.54119e-05
255.427	1.8212e-05			255.054	1.54424e-05
255.546	1.83682e-05			255.161	1.55652e-05
255.653	1.82422e-05			255.28	1.54729e-05
255.773	1.8327e-05			255.388	1.54403e-05
255.892	1.82952e-05			255.495	1.54109e-05
255.999	1.84464e-05			255.615	1.53437e-05
256.118	1.82817e-05			255.734	1.53951e-05
256.226	1.82506e-05			255.853	1.54582e-05
256.333	1.82044e-05			255.972	1.54434e-05
256.441	1.81239e-05			256.091	1.55369e-05
256.56	1.82187e-05			256.21	1.54927e-05
256.679	1.82557e-05			256.329	1.5667e-05
256.798	1.81079e-05			256.437	1.55284e-05
256.917	1.83296e-05			256.544	1.54235e-05
257.036	1.82716e-05			256.652	1.5457e-05
257.155	1.82943e-05			256.759	1.56366e-05
257.274	1.83271e-05			256.867	1.54907e-05
257.382	1.82935e-05			256.986	1.54172e-05
257.501	1.83413e-05			257.094	1.55127e-05
257.62	1.82431e-05			257.212	1.55694e-05
257.728	1.82951e-05			257.332	1.54834e-05
257.846	1.82624e-05			257.451	1.53762e-05
257.966	1.81507e-05			257.558	1.54875e-05
258.085	1.82431e-05			257.654	1.55117e-05
258.204	1.82154e-05			257.762	1.5477e-05
258.323	1.83254e-05			257.869	1.55473e-05
258.419	1.83683e-05			257.988	1.54927e-05
258.538	1.83237e-05			258.108	1.5457e-05
258.657	1.80852e-05			258.226	1.53973e-05
258.776	1.8228e-05			258.346	1.53742e-05
258.895	1.82414e-05			258.465	1.55652e-05
259.014	1.8202e-05			258.572	1.54791e-05
259.122	1.83229e-05			258.691	1.54812e-05
259.241	1.81574e-05			258.81	1.55642e-05
259.36	1.81952e-05			258.93	1.54424e-05
259.456	1.82086e-05			259.048	1.54476e-05
259.575	1.83002e-05			259.168	1.56922e-05
259.683	1.82431e-05			259.287	1.56219e-05
259.802	1.83161e-05			259.394	1.55284e-05
259.921	1.839e-05			259.502	1.55621e-05
260.04	1.82356e-05			259.621	1.56197e-05
260.159	1.82565e-05			259.717	1.54434e-05
260.278	1.81323e-05			259.836	1.5394e-05
260.397	1.8128e-05			259.943	1.5519e-05
260.516	1.838e-05			260.063	1.55957e-05
260.635	1.83237e-05			260.182	1.54696e-05
260.754	1.83875e-05			260.301	1.54308e-05
260.873	1.84321e-05			260.42	1.55516e-05
260.981	1.83573e-05			260.527	1.55295e-05
261.1	1.8207e-05			260.635	1.56093e-05
261.219	1.81565e-05			260.743	1.56272e-05
261.338	1.84379e-05			260.861	1.55075e-05
261.457	1.83413e-05			260.981	1.55116e-05
261.576	1.82909e-05			261.088	1.55925e-05
261.695	1.83044e-05			261.196	1.54791e-05
261.814	1.81944e-05			261.315	1.55536e-05
261.922	1.81398e-05			261.422	1.54162e-05
262.029	1.83606e-05			261.53	1.55116e-05
262.149	1.82926e-05			261.649	1.5646e-05
262.256	1.83582e-05			261.745	1.54801e-05
262.363	1.82322e-05			261.864	1.5688e-05
262.471	1.82893e-05			261.983	1.5539e-05
262.59	1.82489e-05			262.091	1.56523e-05
262.709	1.83086e-05			262.21	1.54644e-05
262.828	1.81927e-05			262.329	1.55169e-05
262.947	1.83279e-05			262.448	1.53352e-05
263.055	1.8396e-05			262.567	1.55757e-05
263.174	1.81205e-05			262.686	1.56985e-05
263.282	1.82986e-05			262.805	1.54791e-05
263.401	1.82506e-05			262.913	1.55463e-05
263.52	1.81625e-05			263.02	1.55652e-05
263.627	1.8259e-05			263.128	1.55e-05
263.746	1.8317e-05			263.236	1.554e-05
263.865	1.82448e-05			263.343	1.55999e-05
263.984	1.82859e-05			263.462	1.55883e-05
264.092	1.83027e-05			263.581	1.55347e-05
264.2	1.83749e-05			263.7	1.55169e-05
264.319	1.82154e-05			263.819	1.55043e-05
264.438	1.82616e-05			263.938	1.56596e-05
264.557	1.81415e-05			264.057	1.54361e-05
264.676	1.82775e-05			264.176	1.54907e-05
264.795	1.82229e-05			264.296	1.56051e-05
264.914	1.83195e-05			264.415	1.54728e-05
265.033	1.8249e-05			264.534	1.54938e-05
265.141	1.82531e-05			264.653	1.54854e-05
265.248	1.82431e-05			264.76	1.54927e-05
265.356	1.82221e-05			264.868	1.55106e-05
265.475	1.83473e-05			264.976	1.54549e-05
265.594	1.83884e-05			265.095	1.55054e-05
265.713	1.83775e-05			265.202	1.55201e-05
265.832	1.83279e-05			265.298	1.53731e-05
265.951	1.83363e-05			265.417	1.55883e-05
266.058	1.82817e-05			265.536	1.55169e-05
266.166	1.83237e-05			265.655	1.54822e-05
266.285	1.82356e-05			265.751	1.54812e-05
266.404	1.81927e-05			265.87	1.54403e-05
266.523	1.81742e-05			265.978	1.55169e-05
266.642	1.83052e-05			266.086	1.56219e-05
266.75	1.81583e-05			266.205	1.55242e-05
266.858	1.82817e-05			266.324	1.55379e-05
266.977	1.81952e-05			266.431	1.56103e-05
267.084	1.82372e-05			266.55	1.55851e-05
267.203	1.83514e-05			266.67	1.54875e-05
267.322	1.8296e-05			266.788	1.55505e-05
267.441	1.8264e-05			266.908	1.55873e-05
267.56	1.81448e-05			267.015	1.54109e-05
267.668	1.827e-05			267.134	1.53542e-05
267.787	1.82632e-05			267.242	1.56397e-05
267.906	1.81415e-05			267.349	1.55064e-05
268.002	1.83439e-05			267.457	1.53867e-05
268.098	1.82843e-05			267.576	1.5562e-05
268.206	1.84236e-05			267.683	1.56366e-05
268.313	1.82851e-05			267.78	1.5434e-05
268.433	1.82053e-05			267.887	1.5541e-05
268.54	1.84094e-05			267.995	1.55715e-05
268.659	1.82489e-05			268.114	1.55568e-05
268.767	1.83674e-05			268.233	1.53531e-05
268.886	1.82666e-05			268.341	1.54099e-05
269.005	1.82103e-05			268.459	1.5561e-05
269.124	1.83095e-05			268.579	1.56072e-05
269.243	1.83884e-05			268.698	1.56145e-05
269.362	1.83271e-05			268.817	1.57647e-05
269.481	1.82758e-05			268.936	1.55316e-05
269.6	1.83245e-05			269.055	1.55652e-05
269.719	1.83741e-05			269.174	1.54235e-05
269.838	1.83019e-05			269.293	1.55347e-05
269.957	1.82876e-05			269.412	1.54371e-05
270.053	1.81498e-05			269.531	1.54592e-05
270.173	1.84178e-05			269.65	1.53909e-05
270.291	1.84379e-05			269.769	1.5435e-05
270.387	1.81902e-05			269.888	1.55189e-05
270.507	1.82388e-05			269.996	1.54098e-05
270.626	1.82364e-05			270.115	1.5457e-05
270.745	1.82364e-05			270.222	1.55232e-05
270.864	1.82885e-05			270.33	1.56062e-05
270.983	1.83674e-05			270.449	1.54822e-05
271.102	1.83371e-05			270.568	1.55747e-05
271.221	1.83128e-05			270.687	1.56597e-05
271.34	1.82255e-05			270.783	1.57499e-05
271.448	1.82934e-05			270.891	1.57205e-05
271.544	1.82775e-05			271.01	1.55201e-05
271.651	1.83086e-05			271.117	1.54822e-05
271.77	1.82507e-05			271.236	1.55074e-05
271.889	1.82843e-05			271.356	1.54885e-05
272.009	1.83304e-05			271.475	1.54602e-05
272.127	1.82061e-05			271.594	1.55274e-05
272.247	1.81717e-05			271.701	1.53845e-05
272.354	1.83808e-05			271.809	1.55368e-05
272.45	1.82465e-05			271.928	1.5435e-05
272.558	1.8359e-05			272.036	1.56922e-05
272.665	1.8364e-05			272.154	1.54403e-05
272.784	1.82783e-05			272.274	1.55211e-05
272.904	1.82406e-05			272.393	1.5689e-05
273.022	1.82238e-05			272.512	1.54602e-05
273.142	1.82263e-05			272.631	1.5478e-05
273.261	1.8191e-05			272.75	1.5539e-05
273.368	1.82372e-05			272.869	1.5497e-05
273.464	1.82507e-05			272.988	1.55494e-05
273.583	1.81809e-05			273.107	1.55642e-05
273.702	1.84069e-05			273.226	1.5581e-05
273.822	1.82187e-05			273.345	1.56995e-05
273.94	1.83506e-05			273.464	1.5583e-05
274.06	1.82305e-05			273.572	1.56639e-05
274.179	1.83582e-05			273.691	1.5581e-05
274.286	1.83691e-05			273.81	1.54844e-05
274.394	1.82599e-05			273.929	1.55053e-05
274.513	1.828e-05			274.048	1.56062e-05
274.632	1.83405e-05			274.167	1.54739e-05
274.74	1.83296e-05			274.286	1.55033e-05
274.847	1.80163e-05			274.405	1.56313e-05
274.966	1.82532e-05			274.524	1.54844e-05
275.085	1.83145e-05			274.644	1.55684e-05
275.204	1.81818e-05			274.763	1.5478e-05
275.323	1.82968e-05			274.882	1.55316e-05
275.431	1.8212e-05			275.001	1.54812e-05
275.55	1.82347e-05			275.12	1.5561e-05
275.658	1.8202e-05			275.239	1.55569e-05
275.777	1.82086e-05			275.346	1.54182e-05
275.873	1.82339e-05			275.431	1.55946e-05
275.98	1.83288e-05			275.55	1.54276e-05
276.099	1.82053e-05			275.658	1.56356e-05
276.207	1.84186e-05			275.776	1.554e-05
276.303	1.82137e-05			275.896	1.54371e-05
276.422	1.82977e-05			276.015	1.54854e-05
276.541	1.83405e-05			276.134	1.54634e-05
276.649	1.83825e-05			276.253	1.5541e-05
276.756	1.8306e-05			276.361	1.54948e-05
276.852	1.82549e-05			276.48	1.54424e-05
276.948	1.82406e-05			276.599	1.54087e-05
277.067	1.83061e-05			276.718	1.55347e-05
277.186	1.83027e-05			276.837	1.55264e-05
277.305	1.83439e-05			276.956	1.55809e-05
277.424	1.8238e-05			277.063	1.57342e-05
277.532	1.83086e-05			277.182	1.54644e-05
277.639	1.81684e-05			277.301	1.56512e-05
277.759	1.81482e-05			277.421	1.56282e-05
277.866	1.81902e-05			277.528	1.55631e-05
277.974	1.8448e-05			277.647	1.53342e-05
278.081	1.8296e-05			277.743	1.54045e-05
278.2	1.8233e-05			277.862	1.54539e-05
278.319	1.84556e-05			277.97	1.54665e-05
278.438	1.82112e-05			278.089	1.55012e-05
278.558	1.82968e-05			278.208	1.55673e-05
278.677	1.82507e-05			278.327	1.54844e-05
278.796	1.82531e-05			278.435	1.55305e-05
278.903	1.82213e-05			278.554	1.54875e-05
279.011	1.83699e-05			278.661	1.56797e-05
279.13	1.82658e-05			278.78	1.5626e-05
279.249	1.82607e-05			278.899	1.56786e-05
279.368	1.82288e-05			279.019	1.54644e-05
279.487	1.84043e-05			279.137	1.55568e-05
279.595	1.81725e-05			279.245	1.5434e-05
279.702	1.82221e-05			279.364	1.55274e-05
[truncated: 3,667 more rows]
